# Supplementary material
Source: PubMed Central journal article supplement (PMC9046384)
Supplement: 41598_2022_10168_MOESM1_ESM.pdf [file 41598_2022_10168_MOESM1_ESM.pdf]

## **Supplementary Table Legends.**

**Table S1. Mitochondrial proteins more highly expressed in heart than lung or vice-versa.** ND - not detected, VL - very low expression <0.01, L - low expression, <0.1, see Table S5 for specific values.

**Table S2. List of quantified proteins significantly different between group B vs. A, from which GO analysis in the upper part of Table 1 is derived.**

**Table S3. List of quantified proteins significantly different between group C vs. A, from which GO analysis in the lower part of Table 1 is derived.**

**Table S4. List of quantified proteins significantly different between hearts of mice treated with (B and C) or without (A) 2DG intermittently for 8 months.** Data used for GO analysis of biological processes and volcano plots, Table 2 and Figure 1, respectively.

**Table S5. Relative abundance of proteins in murine heart and lung.** Total protein from heart or lung homogenates was analysed by mass spectrometry. The values are relative abundance; A - controls, B and C - mice treated with 2DG. The data in Table S1 are derived from this complete list.

| Function     | Protein   | Heart > Lung | Lung > Heart | Protein ID | Function         | Protein | Heart > Lung | Lung > Heart | Protein ID |
|--------------|-----------|--------------|--------------|------------|------------------|---------|--------------|--------------|------------|
| OXPHOS       |           |              |              |            |                  |         |              |              |            |
| Complex I    | NDUAC     | 28 fold      |              | Q7TMF3     | ADP/ATP exchange | ADT1    | 4 fold       |              | P48962     |
|              | NDUS1     | 15 fold      |              | Q91VD9     |                  |         |              |              |            |
|              | NDUAA     | 14 fold      |              | Q99LC3     | TCA cycle        | IDHP    | 5 fold       |              | P54071     |
|              | NDUV1     | 15 fold      |              | Q91YT0     |                  | FUMH    | 7 fold       |              | P97807     |
|              | NDUB9     | 16 fold      |              | Q9CQJ8     |                  | ACON    | 25 fold      |              | Q99KI0     |
|              | NDUA6     | 5 fold       |              | Q9CQZ5     |                  | CISY    | 5 fold       |              | Q9CZU6     |
|              | NDUB8     | 10 fold      |              | Q9D6J5     |                  | ODO1    | 16 fold      |              | Q60597     |
|              | NDUV2     | 15 fold      |              | Q9D6J6     |                  | ODO2    |              | 12 fold      | Q9D2G2     |
|              | NDUA9     | 40 fold      |              | Q9DC69     |                  | SUCA    | 11 fold      |              | Q9WUM5     |
|              | NDUBA     | 8 fold       |              | Q9DCS9     |                  | SUCB1   | 10 fold      |              | Q9Z219     |
|              | NDUS3     | 16 fold      |              | Q9DCT2     |                  |         |              |              |            |
|              | NDUAD     | 15 fold      |              | Q9ERS2     | PDH              | ODP2    | 100 fold     |              | Q8BMF4     |
|              | NDUB6     | ND           | L            | Q3UIU2     |                  | ODPB    | 5 fold       |              | Q9D051     |
|              | NDUA2     | ND           | VL           | Q9CQ75     |                  | PDK2    | 6 fold       |              | Q9JK42     |
|              | NDUA3     | ND           | VL           | Q9CQ91     |                  | PDP1    | 4 fold       |              | Q3UV70     |
|              | NDUB4     | ND           | L            | Q9CQC7     |                  |         |              |              |            |
|              | NDUB5     | ND           | L            | Q9CQH3     | Beta-oxidation   | ACADV   | 10 fold      |              | P50544     |
|              | NDUB3     | ND           | VL           | Q9CQZ6     |                  | ACADL   | 10 fold      |              | P51174     |
|              | NDUB7     | 5 fold       |              | Q9CR61     |                  | ECHA    | 30 fold      |              | Q8BMS1     |
|              |           |              |              |            |                  | ECHB    | 9 fold       |              | Q99JY0     |
| Complex II   | SDHA      | 25 fold      |              | Q8K2B3     |                  | THIL    | 10 fold      |              | Q8QZT1     |
|              | SDHB      | 3 fold       |              | Q9CQA3     |                  |         |              |              |            |
| Complex III  | QCR1      | 9 fold       |              | Q9CZ13     | Morphology       | OPA1    | 7.5 fold     |              | P58281     |
|              | QCR2      | 20 fold      |              | Q9DB77     |                  |         |              |              |            |
|              | UQCC1     | ND           | VL           | Q9CWU6     | RNA metabolism   | LRPPRC  | 8 fold       |              | Q6PB66     |
| Complex IV   | COX2      | 4 fold       |              | P00405     |                  | VWA8    | 7.5 fold     |              | Q8CC88     |
|              | CX6B1     | 24 fold      |              | P56391     | Carrier          | CMC1    | 10 fold      |              | Q8BH59     |
|              | COX20     | L            | ND           | Q9D7J4     |                  |         |              |              |            |
| Cytochrome c | CY1       | 40 fold      |              | Q9D0M3     | Protease         | AFG32   |              | 7 fold       | Q8JZQ2     |
| ATP synthase | ATP5B     | 20 fold      |              | P56480     | Fatty Acetyl CoA | ACOT2   |              | 5 fold       | Q9QYR9     |
|              | ATP5J     | 13 fold      |              | P97450     |                  |         |              |              |            |
|              | ATP5A     | 12 fold      |              | Q03265     |                  |         |              |              |            |
|              | ATP5I (e) | ND           | L            | Q06185     |                  |         |              |              |            |
|              | ATPMD (k) | ND           | L            | Q78IK2     |                  |         |              |              |            |
|              | ATPO      | 6 fold       |              | Q9DB20     |                  |         |              |              |            |
|              | ATP5H     | 30 fold      |              | Q9DCX2     |                  |         |              |              |            |

**Table S1. Mitochondrial proteins more highly expressed in heart than lung or vice-versa.**

Table S2. List of quantified proteins significantly different between group B vs. A from which GO analysis in the upper part of Table 1 is derived.

| T: Accession | T: Entry    | T: Description B/A                                                                                                     | T: #Peptides | T: #Unique | Student's T-test Significant A_B | Student's T-test significant A_B | N: -Log test p-value A_B | N: Student's T-test Difference p value A_B | B/A         | N: Student's T-test Test statistic A_B | A4       | A6      | B21     | B20     | C34     | C35     |         |
|--------------|-------------|------------------------------------------------------------------------------------------------------------------------|--------------|------------|----------------------------------|----------------------------------|--------------------------|--------------------------------------------|-------------|----------------------------------------|----------|---------|---------|---------|---------|---------|---------|
| Q61081       | CDC37_MOUSE | Hsp90 co-chaperone Cdc37 OS=Mus musculus OX=10090 GN=Cdc37 PE=1 SV=1                                                   | 2            | 2          | +                                | A_B                              | 3.10671                  | 0.672746                                   | 0.00078215  | 0.627311537                            | 35.7357  | 10.6707 | 10.7056 | 10.0224 | 10.0084 | 10.6348 | 11.4147 |
| Q9E546       | PARVB_MOUSE | Beta-parvin OS=Mus musculus OX=10090 GN=Parvb PE=1 SV=1                                                                | 3            | 3          | +                                | A_B                              | 3.08095                  | -0.756808                                  | 0.000829946 | 1.689747875                            | -34.69   | 12.2015 | 12.2198 | 12.9476 | 12.9873 | 12.4409 | 13.4767 |
| Q791V5       | MTCH2_MOUSE | Mitochondrial carrier homolog 2 OS=Mus musculus OX=10090 GN=Mtch2 PE=1 SV=1                                            | 5            | 5          | +                                | A_B                              | 2.69117                  | -0.829558                                  | 0.002036245 | 1.777140814                            | -22.1269 | 13.0189 | 13.0668 | 13.8435 | 13.9012 | 13.8138 | 14.5687 |
| Q62000       | MIME_MOUSE  | Mimican OS=Mus musculus OX=10090 GN=Ogn PE=1 SV=1                                                                      | 2            | 2          | +                                | A_B                              | 2.50541                  | -4.01523                                   | 0.00312313  | 16.16980079                            | -17.852  | 5.35403 | 4.97728 | 9.05799 | 9.30378 | 9.88722 | 10.7731 |
| Q99JY3       | GIMA4_MOUSE | GTPase IMAP family member 4 OS=Mus musculus OX=10090 GN=Gimap4 PE=1 SV=2                                               | 2            | 2          | +                                | A_B                              | 2.49148                  | -1.34826                                   | 0.003224928 | 2.546048674                            | -17.5665 | 11.0084 | 11.1611 | 12.4409 | 12.4252 | 13.1098 | 11.8178 |
| Q9E597       | RTN3_MOUSE  | Reticulon-3 OS=Mus musculus OX=10090 GN=Rtn3 PE=1 SV=2                                                                 | 2            | 2          | +                                | A_B                              | 2.4667                   | 3.73875                                    | 0.003414287 | 0.074907293                            | 17.07    | 11.5507 | 11.3049 | 7.87036 | 7.50779 | 11.1163 | 9.88264 |
| Q99L43       | CDS2_MOUSE  | Phosphatidate cytidyltransferase 2 OS=Mus musculus OX=10090 GN=Cds2 PE=1 SV=1                                          | 2            | 2          | +                                | A_B                              | 2.46579                  | -1.10738                                   | 0.003421448 | 2.154540175                            | -17.0522 | 10.388  | 10.388  | 11.5603 | 11.4305 | 10.944  | 11.6027 |
| Q9EP89       | LACTB_MOUSE | Serine beta-lactamase-like protein LACTB mitochondrial OS=Mus musculus OX=10090 GN=Lactb PE=1 SV=1                     | 2            | 2          | +                                | A_B                              | 2.22779                  | -0.449347                                  | 0.005918477 | 1.365422093                            | -12.9408 | 9.5216  | 9.50184 | 9.99435 | 9.92778 | 9.87805 | 8.98584 |
| P55264       | ADK_MOUSE   | Adenosine kinase OS=Mus musculus OX=10090 GN=Adk PE=1 SV=2                                                             | 3            | 3          | +                                | A_B                              | 2.12615                  | -1.18322                                   | 0.007479111 | 2.270830462                            | -11.4982 | 11.7398 | 11.8803 | 12.9181 | 13.0684 | 12.7855 | 11.3332 |
| Q9D6J5       | NDUB8_MOUSE | NADH dehydrogenase [ubiquinone] 1 beta subcomplex subunit 8 mitochondrial OS=Mus musculus OX=10090 GN=Ndufb8 PE=1 SV=1 | 5            | 5          | +                                | A_B                              | 2.10517                  | -0.93843                                   | 0.007849283 | 1.916441553                            | -11.2207 | 14.8337 | 14.8386 | 15.691  | 15.8582 | 15.4318 | 15.6964 |
| Q8K3J1       | NDUS8_MOUSE | NADH dehydrogenase [ubiquinone] iron-sulfur protein 8 mitochondrial OS=Mus musculus OX=10090 GN=Ndufs8 PE=1 SV=1       | 2            | 2          | +                                | A_B                              | 2.02313                  | 1.63995                                    | 0.009481346 | 0.320867595                            | 10.1967  | 13.4893 | 13.7207 | 12.0768 | 11.8533 | 12.7936 | 13.8823 |
| P26043       | RADI_MOUSE  | Radixin OS=Mus musculus OX=10090 GN=Rdx PE=1 SV=3                                                                      | 4            | 3          | +                                | A_B                              | 2.02094                  | -1.01052                                   | 0.009529278 | 2.014637118                            | -10.1706 | 11.3498 | 11.1548 | 12.2819 | 12.2438 | 11.744  | 12.2527 |
| P53994       | RAB2A_MOUSE | Ras-related protein Rab-2A OS=Mus musculus OX=10090 GN=Rab2a PE=1 SV=1                                                 | 4            | 4          | +                                | A_B                              | 1.92248                  | -0.341427                                  | 0.011954186 | 1.2670092                              | -9.064   | 11.9256 | 11.8727 | 12.2137 | 12.2674 | 12.3134 | 12.7524 |
| Q8K310       | MATR3_MOUSE | Matrin-3 OS=Mus musculus OX=10090 GN=Matr3 PE=1 SV=1                                                                   | 3            | 3          | +                                | A_B                              | 1.91693                  | -0.901247                                  | 0.012107933 | 1.867679623                            | -9.0052  | 9.98014 | 9.89482 | 10.7482 | 10.9293 | 10.7313 | 11.3987 |
| Q8R4N0       | CLYBL_MOUSE | Citramalyl-CoA lyase mitochondrial OS=Mus musculus OX=10090 GN=Clybl PE=1 SV=2                                         | 4            | 4          | +                                | A_B                              | 1.87364                  | -0.978233                                  | 0.013377039 | 1.97005103                             | -8.55909 | 11.5265 | 11.5216 | 12.6165 | 12.388  | 12.7711 | 11.9658 |
| A2AN08       | UBR4_MOUSE  | E3 ubiquitin-protein ligase UBR4 OS=Mus musculus OX=10090 GN=Ubr4 PE=1 SV=1                                            | 4            | 4          | +                                | A_B                              | 1.87356                  | 0.978334                                   | 0.013379504 | 0.50756553                             | 8.5583   | 11.0224 | 11.0154 | 10.1548 | 9.9263  | 9.74987 | 10.2408 |
| P47791       | GSHR_MOUSE  | Glutathione reductase mitochondrial OS=Mus musculus OX=10090 GN=Gsr PE=1 SV=3                                          | 2            | 2          | +                                | A_B                              | 1.85936                  | -0.644831                                  | 0.0138242   | 1.563556118                            | -8.4167  | 9.40514 | 9.36413 | 9.95565 | 10.1033 | 10.1674 | 9.81218 |
| P18242       | CATD_MOUSE  | Cathepsin D OS=Mus musculus OX=10090 GN=Ctsd PE=1 SV=1                                                                 | 3            | 3          | +                                | A_B                              | 1.80448                  | -0.649932                                  | 0.015686281 | 1.569094236                            | -7.89014 | 12.7628 | 12.5981 | 13.3304 | 13.3304 | 14.1115 | 13.4893 |
| Q91VH6       | MEMO1_MOUSE | Protein MEMO1 OS=Mus musculus OX=10090 GN=Memo1 PE=1 SV=1                                                              | 2            | 2          | +                                | A_B                              | 1.79356                  | -0.597191                                  | 0.016085701 | 1.512768261                            | -7.78916 | 8.52748 | 8.66178 | 9.22882 | 9.15482 | 9.35755 | 9.13955 |
| P09055       | ITB1_MOUSE  | Integrin beta-1 OS=Mus musculus OX=10090 GN=Itgb1 PE=1 SV=1                                                            | 3            | 3          | +                                | A_B                              | 1.75813                  | -0.606489                                  | 0.017452996 | 1.52254936                             | -7.46997 | 7.45121 | 7.53916 | 8.03342 | 8.16992 | 8.2384  | 7.2854  |
| Q9DCT1       | AKCL2_MOUSE | 1,5-anhydro-D-fructose reductase OS=Mus musculus OX=10090 GN=Akr1e2 PE=1 SV=1                                          | 2            | 2          | +                                | A_B                              | 1.73776                  | -0.846251                                  | 0.018291107 | 1.797823011                            | -7.29214 | 9.7211  | 9.87805 | 10.7313 | 10.5603 | 9.83131 | 10.6439 |
| Q91V61       | SFXN3_MOUSE | Sideroflexin-3 OS=Mus musculus OX=10090 GN=Sfxn3 PE=1 SV=1                                                             | 3            | 3          | +                                | A_B                              | 1.73335                  | 1.28717                                    | 0.018477789 | 0.409754018                            | 7.25423  | 9.47167 | 9.82655 | 8.36194 | 8.36194 | 9.16992 | 9.36194 |
| Q9R0Y5       | KAD1_MOUSE  | Adenylate kinase isoenzyme 1 OS=Mus musculus OX=10090 GN=Ak1 PE=1 SV=1                                                 | 5            | 5          | +                                | A_B                              | 1.72903                  | -1.42676                                   | 0.018662508 | 2.688422718                            | -7.21717 | 15.1908 | 14.887  | 16.3391 | 16.5922 | 15.4383 | 16.5893 |
| Q3TZ27       | ESYT2_MOUSE | Extended synaptotagmin-2 OS=Mus musculus OX=10090 GN=Esyt2 PE=1 SV=1                                                   | 2            | 2          | +                                | A_B                              | 1.70486                  | -0.907253                                  | 0.019730587 | 1.875471058                            | -7.01337 | 7.7211  | 7.46761 | 8.47573 | 8.52748 | 8.92184 | 9.00562 |
| P63017       | HSP7C_MOUSE | Heat shock cognate 71 kDa protein OS=Mus musculus OX=10090 GN=Hspa8 PE=1 SV=1                                          | 11           | 7          | +                                | A_B                              | 1.68549                  | -0.389038                                  | 0.020630512 | 1.309519915                            | -6.85397 | 15.4318 | 15.3233 | 15.7498 | 15.7834 | 15.6068 | 16.68   |
| P98192       | GNPAT_MOUSE | Dihydroxyacetone phosphate acyltransferase OS=Mus musculus OX=10090 GN=Gnpat PE=1 SV=1                                 | 5            | 5          | +                                | A_B                              | 1.66998                  | -1.33806                                   | 0.021380605 | 2.528111336                            | -6.7288  | 9.40301 | 9.21432 | 10.8218 | 10.4717 | 10.5793 | 10.6073 |
| A2AGL3       | RYR3_MOUSE  | Ryanodine receptor 3 OS=Mus musculus OX=10090 GN=Ryr3 PE=1 SV=1                                                        | 2            | 1          | +                                | A_B                              | 1.61814                  | -0.278427                                  | 0.024091287 | 1.212871744                            | -6.32573 | 8.53138 | 8.45121 | 8.7879  | 8.75154 | 9.41574 | 9.41363 |
| Q9Z1Z2       | STRAP_MOUSE | OX=10090 GN=Strap PE=1 SV=2                                                                                            | 3            | 3          | +                                | A_B                              | 1.60892                  | 0.376356                                   | 0.024608209 | 0.770380985                            | 6.25646  | 11.2107 | 11.1674 | 10.7566 | 10.8688 | 12.0224 | 11.3663 |
| Q912X7       | LRP1_MOUSE  | OX=10090 GN=Lrp1 PE=1 SV=1                                                                                             | 2            | 2          | +                                | A_B                              | 1.57932                  | -1.19163                                   | 0.026343896 | 2.284106626                            | -6.03868 | 6.46271 | 6.57847 | 7.52356 | 7.90087 | 7.21917 | 5.97499 |
| Q9WXT5       | SKP1_MOUSE  | S-phase kinase-associated protein 1 OS=Mus musculus OX=10090 GN=Skp1 PE=1 SV=3                                         | 3            | 3          | +                                | A_B                              | 1.5782                   | -1.12365                                   | 0.026411922 | 2.178975538                            | -6.03066 | 11.043  | 10.6795 | 11.944  | 12.0258 | 11.2935 | 11.6393 |
| P23492       | PNPH_MOUSE  | Purine nucleoside phosphorylase OS=Mus musculus OX=10090 GN=Pnp PE=1 SV=2                                              | 3            | 3          | +                                | A_B                              | 1.56876                  | -0.986352                                  | 0.026992307 | 1.981169066                            | -5.96274 | 10.0224 | 10.1421 | 11.2228 | 10.9144 | 11.0566 | 10.3106 |
| P23591       | FCL_MOUSE   | GDP-L-fucose synthase OS=Mus musculus OX=10090 GN=Fsta3 PE=1 SV=3                                                      | 3            | 3          | +                                | A_B                              | 1.56125                  | -0.3153                                    | 0.027463128 | 1.244270365                            | -5.90925 | 9.84235 | 9.94837 | 10.2046 | 10.2167 | 9.80252 | 10.4409 |
| Q9D0E1       | HNRPM_MOUSE | Heterogeneous nuclear ribonucleoprotein M OS=Mus musculus OX=10090 GN=Hnrpm PE=1 SV=3                                  | 8            | 8          | +                                | A_B                              | 1.54878                  | -0.574329                                  | 0.028263113 | 1.488984773                            | -5.82143 | 11.8803 | 11.9873 | 12.4252 | 12.5911 | 13.0549 | 13.1357 |
| P08032       | SPTA1_MOUSE | Spectrin alpha chain erythrocytic 1 OS=Mus musculus OX=10090 GN=Spta1 PE=1 SV=3                                        | 15           | 15         | +                                | A_B                              | 1.54613                  | -0.565808                                  | 0.028436098 | 1.480216291                            | -5.80291 | 11.5216 | 11.6926 | 12.1261 | 12.2198 | 12.2703 | 12.2137 |
| P51667       | MLRV_MOUSE  | Myosin regulatory light chain 2 ventricular/cardiac muscle isoform OS=Mus musculus OX=10090 GN=Myl2 PE=1 SV=3          | 8            | 8          | +                                | A_B                              | 1.53185                  | -1.47235                                   | 0.029386645 | 2.774735012                            | -5.70406 | 12.5507 | 12.0396 | 13.7313 | 13.8037 | 12.905  | 13.6883 |
| Q8VU6        | SFPQ_MOUSE  | Splicing factor proline- and glutamine-rich OS=Mus musculus OX=10090 GN=Sfpq PE=1 SV=1                                 | 2            | 2          | +                                | A_B                              | 1.52527                  | 0.361922                                   | 0.029835272 | 0.778127245                            | 5.65906  | 10.1033 | 10.1293 | 9.81698 | 9.69174 | 10.3106 | 10.3987 |
| Q9QYQ0       | NDRG2_MOUSE | Protein NDRG2 OS=Mus musculus OX=10090 GN=Ndr2 PE=1 SV=1                                                               | 7            | 7          | +                                | A_B                              | 1.51658                  | -0.883662                                  | 0.030438272 | 1.845052669                            | -5.60008 | 15.2622 | 15.1596 | 16.2438 | 15.9454 | 15.8113 | 16.2344 |
| Q99MN9       | PCCB_MOUSE  | Propionyl-CoA carboxylase beta chain mitochondrial OS=Mus musculus OX=10090 GN=Pccb PE=1 SV=2                          | 11           | 11         | +                                | A_B                              | 1.51447                  | -0.4984                                    | 0.030586515 | 1.412646019                            | -5.58588 | 14.3512 | 14.3092 | 14.9153 | 14.7419 | 14.9703 | 15.1236 |

|        |             |                                                                                                                                      |    |    |   |     |         |           |             |             |          |         |         |         |         |         |         |
|--------|-------------|--------------------------------------------------------------------------------------------------------------------------------------|----|----|---|-----|---------|-----------|-------------|-------------|----------|---------|---------|---------|---------|---------|---------|
| Q9DCW4 | ETFB_MOUSE  | Electron transfer flavoprotein subunit beta OS=Mus musculus OX=10090 GN=Etfb PE=1 SV=3                                               | 4  | 4  | + | A_B | 1.5138  | -0.700689 | 0.030633738 | 1.625280806 | -5.58133 | 17.4576 | 17.7073 | 18.2967 | 18.2696 | 18.2232 | 18.2832 |
| Q8VDM4 | PSMD2_MOUSE | 26S proteasome non-ATPase regulatory subunit 2 OS=Mus musculus OX=10090 GN=Psmd2 PE=1 SV=1                                           | 6  | 6  | + | A_B | 1.50117 | -1.12808  | 0.031537699 | 2.185676674 | -5.49695 | 9.53528 | 9.66178 | 10.5314 | 10.9218 | 10.0084 | 9.82177 |
| A2AAJ9 | OBSCN_MOUSE | Obscurin OS=Mus musculus OX=10090 GN=Obscn PE=1 SV=3                                                                                 | 50 | 50 | + | A_B | 1.48455 | -0.251754 | 0.032768005 | 1.190653809 | -5.38759 | 15.5111 | 15.4186 | 15.7233 | 15.7099 | 16.0868 | 16.0575 |
| P17710 | HXK1_MOUSE  | Hexokinase-1 OS=Mus musculus OX=10090 GN=Hk1 PE=1 SV=3                                                                               | 7  | 7  | + | A_B | 1.47399 | -0.530436 | 0.033574534 | 1.444365634 | -5.31912 | 12.2408 | 12.4357 | 12.8899 | 12.8474 | 12.8238 | 13.169  |
| P56399 | UBP5_MOUSE  | Ubiquitin carboxyl-terminal hydrolase 5 OS=Mus musculus OX=10090 GN=Usp5                                                             | 7  | 7  | + | A_B | 1.46269 | -0.736024 | 0.034459582 | 1.665579249 | -5.24677 | 13.6096 | 13.3443 | 14.1674 | 14.2586 | 14.3581 | 14.2732 |
| Q91YM4 | FAKD4_MOUSE | FAST kinase domain-containing protein 4 OS=Mus musculus OX=10090                                                                     | 2  | 2  | + | A_B | 1.4568  | -1.38703  | 0.034930114 | 2.615397082 | -5.20937 | 8.26209 | 8.41363 | 9.46964 | 9.98014 | 9.22159 | 9.45327 |
| Q9DCV4 | RMD1_MOUSE  | Regulator of microtubule dynamics protein 1 OS=Mus musculus OX=10090                                                                 | 2  | 2  | + | A_B | 1.44448 | 0.581348  | 0.035935195 | 0.668339015 | 5.13199  | 12.9961 | 12.8553 | 12.2556 | 12.4331 | 13.1    | 13.7524 |
| P56501 | UCP3_MOUSE  | Mitochondrial uncoupling protein 3 OS=Mus musculus OX=10090 GN=Ucp3                                                                  | 3  | 3  | + | A_B | 1.418   | -1.066    | 0.038194427 | 2.093620564 | -4.96907 | 12.0014 | 12.4305 | 13.2834 | 13.2805 | 12.577  | 11.4818 |
| Q91VT4 | CBR4_MOUSE  | Carbonyl reductase family member 4 OS=Mus musculus OX=10090 GN=Cbr4                                                                  | 5  | 5  | + | A_B | 1.40742 | -0.763546 | 0.039136321 | 1.697658175 | -4.90528 | 11.5068 | 11.5887 | 12.4615 | 12.1611 | 11.933  | 12.4919 |
| P35564 | CALX_MOUSE  | Calnexin OS=Mus musculus OX=10090 GN=Canx PE=1 SV=1                                                                                  | 4  | 4  | + | A_B | 1.3923  | -0.936227 | 0.040522852 | 1.913517374 | -4.81539 | 12.4331 | 12.5093 | 13.5981 | 13.2167 | 13.7313 | 13.0345 |
| Q60864 | STIP1_MOUSE | Stress-induced-phosphoprotein 1 OS=Mus musculus OX=10090 GN=Stip1 PE=1 SV=1                                                          | 5  | 5  | + | A_B | 1.38785 | -0.928177 | 0.040940204 | 1.902869996 | -4.78917 | 11.2228 | 10.8376 | 11.9366 | 11.9801 | 11.4666 | 11.6165 |
| P00920 | CAH2_MOUSE  | Carbonic anhydrase 2 OS=Mus musculus OX=10090 GN=Ca2 PE=1 SV=4                                                                       | 4  | 4  | + | A_B | 1.38773 | -2.21398  | 0.040951518 | 4.6395343   | -4.78848 | 11.4409 | 10.6073 | 13.0379 | 13.4383 | 12.8975 | 10.7649 |
| P70168 | IMB1_MOUSE  | Importin subunit beta-1 OS=Mus musculus OX=10090 GN=Kpnb1 PE=1 SV=2 ATP-binding cassette sub-family B member 10 mitochondrial OS=Mus | 6  | 6  | + | A_B | 1.38759 | -1.2172   | 0.040964721 | 2.324950499 | -4.78769 | 11.9144 | 11.4094 | 12.8494 | 12.9088 | 12.4226 | 12.7313 |
| Q9JI39 | ABCBA_MOUSE | musculus OX=10090 GN=Abcb10 PE=1 SV=1                                                                                                | 4  | 4  | + | A_B | 1.38014 | -1.62376  | 0.041673502 | 3.081771722 | -4.74411 | 9.65105 | 10.1799 | 11.7566 | 11.3219 | 12.5142 | 11.8297 |
| Q62165 | DAG1_MOUSE  | Dystroglycan OS=Mus musculus OX=10090 GN=Dag1 PE=1 SV=4                                                                              | 3  | 3  | + | A_B | 1.37991 | -0.98923  | 0.041695578 | 1.9851252   | -4.7428  | 10.9218 | 10.7649 | 12.0258 | 11.6393 | 12.158  | 11.3554 |
| P12382 | PFKAL_MOUSE | GN=Pfk1 PE=1 SV=4                                                                                                                    | 4  | 4  | + | A_B | 1.37366 | -0.626094 | 0.042299964 | 1.543380732 | -4.70656 | 11.6073 | 11.3826 | 12.1923 | 12.0498 | 11.9979 | 11.3106 |
| Q8K2I3 | FMO2_MOUSE  | Dimethylaniline monooxygenase [N-oxide-forming] 2 OS=Mus musculus OX=10090 GN=Fmo2 PE=1 SV=3                                         | 2  | 2  | + | A_B | 1.37079 | 0.875666  | 0.042580426 | 0.545002216 | 4.68996  | 11.0901 | 11.2877 | 10.1548 | 10.4717 | 10.5699 | 10.6707 |
| O09174 | AMACR_MOUSE | Alpha-methylacyl-CoA racemase OS=Mus musculus OX=10090 GN=Amacr PE=1 SV=4                                                            | 5  | 5  | + | A_B | 1.35218 | -0.237444 | 0.044444702 | 1.178902168 | -4.58383 | 12.1066 | 12.158  | 12.4147 | 12.3247 | 11.9403 | 12.1066 |
| P40336 | VP26A_MOUSE | Vacuolar protein sorting-associated protein 26A OS=Mus musculus OX=10090                                                             | 5  | 5  | + | A_B | 1.34156 | -1.05359  | 0.045544926 | 2.075688567 | -4.52416 | 10.9069 | 11.1163 | 12.2732 | 11.8572 | 11.7056 | 11.8376 |
| Q91WD5 | NDUS2_MOUSE | NADH dehydrogenase [ubiquinone] iron-sulfur protein 2 mitochondrial OS=Mus musculus OX=10090 GN=Ndufs2 PE=1 SV=1                     | 6  | 6  | + | A_B | 1.33191 | -0.84458  | 0.046568259 | 1.79574189  | -4.47056 | 11.5934 | 11.2586 | 12.3581 | 12.183  | 13.3443 | 13.183  |
| Q9CWX2 | CIA30_MOUSE | Complex I intermediate-associated protein 30 mitochondrial OS=Mus musculus OX=10090 GN=Ndufa1 PE=1 SV=2                              | 3  | 3  | + | A_B | 1.32012 | -1.02511  | 0.047849786 | 2.035114548 | -4.40579 | 9.8009  | 9.35975 | 10.6795 | 10.5314 | 9.96434 | 9.84706 |
| Q99K41 | EMIL1_MOUSE | EMILIN-1 OS=Mus musculus OX=10090 GN=Emilin1 PE=1 SV=1                                                                               | 2  | 2  | + | A_B | 1.31195 | -0.760081 | 0.048758462 | 1.693585708 | -4.36141 | 6.63372 | 6.6865  | 7.24793 | 7.59246 | 6.17393 | 6.80872 |
| Q9D1D4 | TMEDA_MOUSE | Transmembrane emp24 domain-containing protein 10 OS=Mus musculus OX=10090 GN=Tmed10 PE=1 SV=1                                        | 2  | 2  | + | A_B | 1.31161 | -1.84454  | 0.048796649 | 3.591384204 | -4.35953 | 8.14975 | 7.52356 | 9.96578 | 9.3966  | 9.98014 | 9.37504 |
| Q9D7A8 | ARMC1_MOUSE | Armadillo repeat-containing protein 1 OS=Mus musculus OX=10090 GN=Armc1 PE=1 SV=1                                                    | 3  | 3  | + | A_B | 1.30921 | -1.60271  | 0.049067056 | 3.037132816 | -4.3466  | 9.44708 | 9.62571 | 10.7814 | 11.4969 | 11.5699 | 11.5216 |
| P48722 | HS74L_MOUSE | Heat shock 70 kDa protein 4L OS=Mus musculus OX=10090 GN=Hspa4l PE=1 SV=2                                                            | 4  | 4  | + | A_B | 1.30759 | -0.464736 | 0.049250427 | 1.380064791 | -4.33785 | 10.4615 | 10.4818 | 11.043  | 10.8297 | 10.8842 | 11.2527 |
| Q9D6Y9 | GLGB_MOUSE  | 1,4-alpha-glucan-branching enzyme OS=Mus musculus OX=10090 GN=Gbe1 PE=1 SV=1                                                         | 7  | 7  | + | A_B | 1.3055  | -0.938919 | 0.049488011 | 1.917091239 | -4.32659 | 10.4512 | 10.3987 | 11.5793 | 11.1485 | 11.1799 | 10.42   |

Table S3. List of quantified proteins significantly different between group C vs. A from which GO analysis in the lower part of Table 1 is derived.

| T: Accession | T: Entry    | T: Description C/A                                                                                                      | T: #Peptides | T: #Unique | C: Student's T-test Significant A_C | T: Student's T-test significant | N: -Log Student's T-test p-value A_C | N: Student's T-test Difference | p value     | C/A         | N: Student's T-test statistic A_C | A4      | A6      | B21     | B20     | C34     | C35     |
|--------------|-------------|-------------------------------------------------------------------------------------------------------------------------|--------------|------------|-------------------------------------|---------------------------------|--------------------------------------|--------------------------------|-------------|-------------|-----------------------------------|---------|---------|---------|---------|---------|---------|
| Q8CDN6       | TXNL1_MOUSE | Thioredoxin-like protein 1 OS=Mus musculus OX=10090 GN=Txnl1 PE=1 SV=3                                                  | 2            | 2          | +                                   | A_C                             | 4.00278                              | -1.46047                       | 9.93619E-05 | 2.751980028 | -100.313                          | 7.98868 | 8.01123 | 8.3837  | 8.79766 | 9.46964 | 9.45121 |
| A2ASS6       | TITIN_MOUSE | Titin OS=Mus musculus OX=10090 GN=Ttn PE=1 SV=1                                                                         | 516          | 516        | +                                   | A_C                             | 3.52091                              | -0.37571                       | 0.000301363 | 1.297477931 | -57.5913                          | 21.1825 | 21.1704 | 21.5592 | 21.3962 | 21.5545 | 21.5498 |
| Q9QZE5       | COPG1_MOUSE | Coatamer subunit gamma-1 OS=Mus musculus OX=10090 GN=Copg1 PE=1 SV=1                                                    | 2            | 2          | +                                   | A_C                             | 3.29336                              | -2.51828                       | 0.000508909 | 5.728986746 | -44.3114                          | 6.54844 | 6.53957 | 6.78136 | 4.66107 | 9.00562 | 9.11894 |
| A2AGL3       | RYR3_MOUSE  | Ryanodine receptor 3 OS=Mus musculus OX=10090 GN=Ryr3 PE=1 SV=1                                                         | 2            | 1          | +                                   | A_C                             | 2.72572                              | -0.923388                      | 0.001880529 | 1.896563926 | -23.0276                          | 8.53138 | 8.45121 | 8.7879  | 8.75154 | 9.41574 | 9.41363 |
| Q9D7A8       | ARMC1_MOUSE | Armadillo repeat-containing protein 1 OS=Mus musculus OX=10090 GN=Armc1 PE=1 SV=1                                       | 3            | 3          | +                                   | A_C                             | 2.67507                              | -2.00933                       | 0.002113148 | 4.025952079 | -21.7192                          | 9.44708 | 9.62571 | 10.7814 | 11.4969 | 11.5699 | 11.5216 |
| Q9D0E1       | HNRPM_MOUSE | Heterogeneous nuclear ribonucleoprotein M OS=Mus musculus OX=10090 GN=Hnrpnm PE=1 SV=3                                  | 8            | 8          | +                                   | A_C                             | 2.48011                              | -1.16152                       | 0.003310473 | 2.236929828 | -17.3371                          | 11.8803 | 11.9873 | 12.4252 | 12.5911 | 13.0549 | 13.1357 |
| Q8K1M6       | DNM1L_MOUSE | Dynamin-1-like protein OS=Mus musculus OX=10090 GN=Dnm1l PE=1 SV=2                                                      | 12           | 12         | +                                   | A_C                             | 2.44455                              | -1.25832                       | 0.00359294  | 2.392170135 | -16.638                           | 12.0293 | 11.9549 | 13.2061 | 12.7228 | 13.1846 | 13.3163 |
| Q8CC88       | VWA8_MOUSE  | von Willebrand factor A domain-containing protein 8 OS=Mus musculus OX=10090 GN=Vwa8 PE=1 SV=2                          | 24           | 24         | +                                   | A_C                             | 2.42153                              | -0.618814                      | 0.003788524 | 1.535612278 | -16.2004                          | 14.4383 | 14.5142 | 14.8582 | 14.4186 | 15.0909 | 15.0992 |
| P46935       | NEDD4_MOUSE | E3 ubiquitin-protein ligase NEDD4 OS=Mus musculus OX=10090 GN=Nedd4 PE=1 SV=3                                           | 5            | 5          | +                                   | A_C                             | 2.33593                              | -0.568904                      | 0.004613919 | 1.483396222 | -14.671                           | 10.6073 | 10.5887 | 11.0293 | 10.5018 | 11.2046 | 11.1293 |
| P98192       | GNPAT_MOUSE | Dihydroxyacetone phosphate acyltransferase OS=Mus musculus OX=10090 GN=Gnpat PE=1 SV=1                                  | 5            | 5          | +                                   | A_C                             | 2.26223                              | -1.28466                       | 0.005467263 | 2.436246309 | -13.4687                          | 9.40301 | 9.21432 | 10.8218 | 10.4717 | 10.5793 | 10.6073 |
| Q9EQK5       | MVP_MOUSE   | Major vault protein OS=Mus musculus OX=10090 GN=Mvp PE=1 SV=4                                                           | 7            | 7          | +                                   | A_C                             | 2.22121                              | -0.712732                      | 0.006008831 | 1.638904738 | -12.8422                          | 11.5314 | 11.4305 | 12.2408 | 11.6926 | 12.2167 | 12.1706 |
| A2AAJ9       | OBSCN_MOUSE | Obscurin OS=Mus musculus OX=10090 GN=Obscn PE=1 SV=3                                                                    | 50           | 50         | +                                   | A_C                             | 2.19915                              | -0.607253                      | 0.006321935 | 1.523355861 | -12.5172                          | 15.5111 | 15.4186 | 15.7233 | 15.7099 | 16.0868 | 16.0575 |
| P50396       | GDIA_MOUSE  | Rab GDP dissociation inhibitor alpha OS=Mus musculus OX=10090 GN=Gdi1 PE=1 SV=3                                         | 5            | 4          | +                                   | A_C                             | 2.11028                              | -0.748717                      | 0.007757468 | 1.680297864 | -11.2876                          | 12.1357 | 12.1131 | 12.2258 | 11.5459 | 12.8078 | 12.9385 |
| Q62188       | DPYL3_MOUSE | Dihydropyrimidinase-related protein 3 OS=Mus musculus OX=10090 GN=Dpyl3 PE=1 SV=1                                       | 5            | 4          | +                                   | A_C                             | 2.07023                              | -0.855741                      | 0.008506874 | 1.809688012 | -10.7728                          | 9.76321 | 9.90989 | 10.5216 | 10.1548 | 10.7228 | 10.6618 |
| Q62000       | MIME_MOUSE  | Mimecan OS=Mus musculus OX=10090 GN=Mgn PE=1 SV=1                                                                       | 2            | 2          | +                                   | A_C                             | 2.06675                              | -5.16453                       | 0.008575313 | 35.86562832 | -10.7292                          | 5.35403 | 4.97728 | 9.05799 | 9.30378 | 9.88722 | 10.7731 |
| Q8QZS1       | HIBCH_MOUSE | 3-hydroxyisobutyryl-CoA hydrolase mitochondrial OS=Mus musculus OX=10090 GN=Hibch PE=1 SV=1                             | 3            | 3          | +                                   | A_C                             | 2.04536                              | -2.02525                       | 0.009008241 | 4.070624093 | -10.4648                          | 12.5887 | 12.8803 | 14.183  | 13.5507 | 14.887  | 14.6325 |
| Q3TZ77       | ESYT2_MOUSE | Extended synaptotagmin-2 OS=Mus musculus OX=10090 GN=Esyt2 PE=1 SV=1                                                    | 2            | 2          | +                                   | A_C                             | 2.02828                              | -1.36938                       | 0.009369577 | 2.583595119 | -10.2583                          | 7.7211  | 7.46761 | 8.47573 | 8.52748 | 8.92184 | 9.00562 |
| Q91WD5       | NDUS2_MOUSE | NADH dehydrogenase [ubiquinone] iron-sulfur protein 2 mitochondrial OS=Mus musculus OX=10090 GN=Ndufs2 PE=1 SV=1        | 6            | 6          | +                                   | A_C                             | 1.99694                              | -1.83768                       | 0.010070708 | 3.574347746 | -9.88943                          | 11.5934 | 11.2586 | 12.3581 | 12.183  | 13.3443 | 13.183  |
| Q9CZW5       | TOM70_MOUSE | Mitochondrial import receptor subunit TOM70 OS=Mus musculus OX=10090 GN=Tom70 PE=1 SV=2                                 | 5            | 5          | +                                   | A_C                             | 1.97585                              | -1.25983                       | 0.010571826 | 2.394675216 | -9.64854                          | 10.0901 | 9.87958 | 10.7895 | 11.6257 | 11.1674 | 11.3219 |
| Q99MN9       | PCCB_MOUSE  | Propionyl-CoA carboxylase beta chain mitochondrial OS=Mus musculus OX=10090 GN=Pccb PE=1 SV=2                           | 11           | 11         | +                                   | A_C                             | 1.91791                              | -0.716757                      | 0.012080642 | 1.643483532 | -9.01555                          | 14.3512 | 14.3092 | 14.9153 | 14.7419 | 14.9703 | 15.1236 |
| Q99KF1       | TMED9_MOUSE | Transmembrane emp24 domain-containing protein 9 OS=Mus musculus OX=10090 GN=Tmed9 PE=1 SV=2                             | 2            | 2          | +                                   | A_C                             | 1.91358                              | -0.932148                      | 0.01220169  | 1.908114837 | -8.96985                          | 10.0634 | 9.88417 | 9.67948 | 10.5699 | 10.8533 | 10.9586 |
| P54071       | IDHP_MOUSE  | Isocitrate dehydrogenase [NADP] mitochondrial OS=Mus musculus OX=10090 GN=idh2 PE=1 SV=3                                | 10           | 10         | +                                   | A_C                             | 1.90374                              | -0.427423                      | 0.012481305 | 1.344829242 | -8.86693                          | 17.68   | 17.7406 | 18.1801 | 17.6937 | 18.1002 | 18.1752 |
| Q99MN1       | SYK_MOUSE   | Lysine-tRNA ligase OS=Mus musculus OX=10090 GN=Kars1 PE=1 SV=1                                                          | 3            | 3          | +                                   | A_C                             | 1.90346                              | -0.404115                      | 0.012489355 | 1.323276917 | -8.86406                          | 10.6795 | 10.5981 | 11.4666 | 10.8994 | 11.0224 | 11.0634 |
| OS4724       | CAVN1_MOUSE | Caveolae-associated protein 1 OS=Mus musculus OX=10090 GN=Cavin1 PE=1 SV=1                                              | 6            | 6          | +                                   | A_C                             | 1.86694                              | -1.01323                       | 0.013585011 | 2.018425027 | -8.49201                          | 15.5356 | 15.435  | 15.6828 | 15.2805 | 16.3904 | 16.6068 |
| Q9DC69       | NDUA9_MOUSE | NADH dehydrogenase [ubiquinone] 1 alpha subcomplex subunit 9 mitochondrial OS=Mus musculus OX=10090 GN=Ndufa9 PE=1 SV=2 | 6            | 6          | +                                   | A_C                             | 1.85234                              | -0.952422                      | 0.014049472 | 1.935118614 | -8.34745                          | 16.5507 | 16.6382 | 17.3667 | 17.0847 | 17.6523 | 17.4415 |
| Q5SW19       | CLU_MOUSE   | Clustered mitochondria protein homolog OS=Mus musculus OX=10090 GN=Cluh PE=1 SV=2                                       | 6            | 6          | +                                   | A_C                             | 1.82675                              | -1.02027                       | 0.014902187 | 2.02829852  | -8.09985                          | 11.4409 | 11.4969 | 11.5411 | 11.5507 | 12.6119 | 12.3663 |
| Q9CWD8       | NUBPL_MOUSE | Iron-sulfur protein NUBPL OS=Mus musculus OX=10090 GN=Nubpl PE=1 SV=2                                                   | 2            | 2          | +                                   | A_C                             | 1.806                                | -1.35197                       | 0.015631476 | 2.552604457 | -7.90427                          | 8.29002 | 8.11374 | 9.50184 | 8.91886 | 9.70044 | 9.40727 |
| O55106       | STRN_MOUSE  | Striatin OS=Mus musculus OX=10090 GN=Strn PE=1 SV=2                                                                     | 3            | 3          | +                                   | A_C                             | 1.80491                              | -1.05294                       | 0.015670758 | 2.074753585 | -7.8941                           | 8.73132 | 8.69697 | 8.84862 | 8.54689 | 9.63481 | 9.89936 |
| Q02788       | CO6A2_MOUSE | Collagen alpha-2(VI) chain OS=Mus musculus OX=10090 GN=Col6a2 PE=1 SV=3                                                 | 8            | 8          | +                                   | A_C                             | 1.78732                              | 0.252648                       | 0.016318491 | 0.839354404 | 7.73202                           | 13.92   | 13.8727 | 13.2423 | 14.0701 | 13.6211 | 13.6662 |
| P51125       | ICAL_MOUSE  | Calpastatin OS=Mus musculus OX=10090 GN=Cast PE=1 SV=2                                                                  | 3            | 3          | +                                   | A_C                             | 1.76777                              | 0.661633                       | 0.017069862 | 0.632162341 | 7.55564                           | 10.6348 | 10.6707 | 10.4512 | 9.57175 | 9.90539 | 10.0768 |
| Q9DB20       | ATPO_MOUSE  | ATP synthase subunit O mitochondrial OS=Mus musculus OX=10090 GN=Atp5po PE=1 SV=1                                       | 2            | 2          | +                                   | A_C                             | 1.75214                              | -0.802829                      | 0.017695384 | 1.744518625 | -7.41726                          | 14.726  | 14.8533 | 16.9083 | 16.0617 | 15.68   | 15.5049 |

|        |             |                                                                                                                        |    |    |   |     |         |           |             |             |          |         |         |         |         |         |         |
|--------|-------------|------------------------------------------------------------------------------------------------------------------------|----|----|---|-----|---------|-----------|-------------|-------------|----------|---------|---------|---------|---------|---------|---------|
| Q91YM4 | FAKD4_MOUSE | FAST kinase domain-containing protein 4 OS=Mus musculus OX=10090 GN=Tbrg4 PE=1 SV=1                                    | 2  | 2  | + | A_C | 1.72951 | -0.999568 | 0.018641893 | 1.99940121  | -7.2213  | 8.26209 | 8.41363 | 9.46964 | 9.98014 | 9.22159 | 9.45327 |
| G5E8K5 | ANK3_MOUSE  | Ankyrin-3 OS=Mus musculus OX=10090 GN=Ank3 PE=1 SV=1                                                                   | 3  | 1  | + | A_C | 1.727   | -1.80523  | 0.018749945 | 3.494848701 | -7.19991 | 6.75489 | 6.54998 | 8.74819 | 7.62936 | 8.6865  | 8.22882 |
| P08032 | SPTA1_MOUSE | Spectrin alpha chain erythrocytic 1 OS=Mus musculus OX=10090 GN=Spta1 PE=1 SV=3                                        | 15 | 15 | + | A_C | 1.70915 | -0.634895 | 0.019536646 | 1.552824731 | -7.0492  | 11.5216 | 11.6926 | 12.1261 | 12.2198 | 12.2703 | 12.2137 |
| Q9JIQ3 | DBLOH_MOUSE | Diablo homolog mitochondrial OS=Mus musculus OX=10090 GN=Diablo PE=1 SV=2                                              | 3  | 3  | + | A_C | 1.67739 | -0.757741 | 0.021018901 | 1.690840999 | -6.78833 | 8.81378 | 9.01959 | 9.53916 | 8.41785 | 9.71768 | 9.63118 |
| P49442 | INPP_MOUSE  | Inositol polyphosphate 1-phosphatase OS=Mus musculus OX=10090 GN=Inpp1 PE=1 SV=2                                       | 3  | 3  | + | A_C | 1.66791 | -0.58572  | 0.021482756 | 1.500787795 | -6.71228 | 9.9542  | 9.95128 | 10.8533 | 10.2877 | 10.6257 | 10.4512 |
| P29758 | OAT_MOUSE   | Ornithine aminotransferase mitochondrial OS=Mus musculus OX=10090 GN=Oat PE=1 SV=1                                     | 7  | 7  | + | A_C | 1.65396 | -2.48523  | 0.022184007 | 5.599236043 | -6.60177 | 13.6883 | 12.944  | 15.9882 | 15.1869 | 15.8582 | 15.7445 |
| P27546 | MAP4_MOUSE  | Microtubule-associated protein 4 OS=Mus musculus OX=10090 GN=Map4 PE=1 SV=3                                            | 7  | 7  | + | A_C | 1.65392 | -0.831233 | 0.022186051 | 1.779205311 | -6.6014  | 11.7356 | 11.6027 | 12.1033 | 11.9293 | 12.6073 | 12.3934 |
| P54116 | STOM_MOUSE  | Erythrocyte band 7 integral membrane protein OS=Mus musculus OX=10090 GN=Stom PE=1 SV=3                                | 3  | 3  | + | A_C | 1.64148 | -0.37578  | 0.022830741 | 1.297540887 | -6.50437 | 12.5911 | 12.4767 | 12.4486 | 11.6073 | 12.9012 | 12.9181 |
| P40336 | VP26A_MOUSE | Vacuolar protein sorting-associated protein 26A OS=Mus musculus OX=10090 GN=Vps26a PE=1 SV=1                           | 5  | 5  | + | A_C | 1.59316 | -0.760013 | 0.02551761  | 1.693505885 | -6.13966 | 10.9069 | 11.1163 | 12.2732 | 11.8572 | 11.7056 | 11.8376 |
| P98156 | VLDLR_MOUSE | Very low-density lipoprotein receptor OS=Mus musculus OX=10090 GN=Vldlr PE=1 SV=1                                      | 3  | 3  | + | A_C | 1.58565 | -0.767229 | 0.025962709 | 1.701997597 | -6.08465 | 9.16992 | 9.23122 | 9.29692 | 9.00562 | 9.84549 | 10.0901 |
| Q68FD5 | CLH1_MOUSE  | Clathrin heavy chain 1 OS=Mus musculus OX=10090 GN=Cltc PE=1 SV=3                                                      | 23 | 23 | + | A_C | 1.58553 | -0.521711 | 0.025969883 | 1.435656892 | -6.08383 | 13.5507 | 13.3987 | 14.1984 | 13.8727 | 13.9567 | 14.0362 |
| Q8CI94 | PYGB_MOUSE  | Glycogen phosphorylase brain form OS=Mus musculus OX=10090 GN=Pygb PE=1 SV=3                                           | 18 | 14 | + | A_C | 1.57943 | -1.14986  | 0.026337224 | 2.218923608 | -6.03948 | 15.5204 | 15.1397 | 16.8965 | 16.3701 | 16.4752 | 16.4846 |
| P56399 | UBP5_MOUSE  | Ubiquitin carboxyl-terminal hydrolase 5 OS=Mus musculus OX=10090 GN=Usp5 PE=1 SV=1                                     | 7  | 7  | + | A_C | 1.57685 | -0.838689 | 0.026494151 | 1.788424234 | -6.0209  | 13.6096 | 13.3443 | 14.1674 | 14.2586 | 14.3581 | 14.2732 |
| Q02257 | PLAK_MOUSE  | Junction plakoglobin OS=Mus musculus OX=10090 GN=Jup PE=1 SV=3                                                         | 7  | 7  | + | A_C | 1.57127 | -1.25751  | 0.026836755 | 2.39082743  | -5.98076 | 10.6528 | 11.0634 | 11.5603 | 11.8533 | 12.1611 | 12.0701 |
| Q8BND5 | QSOX1_MOUSE | Sulphydryl oxidase 1 OS=Mus musculus OX=10090 GN=Qsox1 PE=1 SV=1                                                       | 2  | 2  | + | A_C | 1.56872 | -0.804775 | 0.026994793 | 1.746873332 | -5.96247 | 9.46964 | 9.20457 | 9.8933  | 10.6883 | 10.1674 | 10.1163 |
| Q9JJW5 | MYOZ2_MOUSE | Myozenin-2 OS=Mus musculus OX=10090 GN=Myoz2 PE=1 SV=1                                                                 | 6  | 6  | + | A_C | 1.55578 | -0.903382 | 0.027811217 | 1.870445591 | -5.87059 | 15.8942 | 15.5893 | 16.3127 | 16.0232 | 16.624  | 16.6662 |
| Q64310 | SURF4_MOUSE | Surfeit locus protein 4 OS=Mus musculus OX=10090 GN=Surf4 PE=1 SV=1                                                    | 2  | 2  | + | A_C | 1.53466 | -1.24603  | 0.029197119 | 2.37187832  | -5.72343 | 10.2288 | 10.6439 | 11.9586 | 10.9873 | 11.7482 | 11.6165 |
| Q9D0K2 | SCOT1_MOUSE | Succinyl-CoA:3-ketoacid coenzyme A transferase 1 mitochondrial OS=Mus musculus OX=10090 GN=Oxct1 PE=1 SV=1             | 6  | 6  | + | A_C | 1.5123  | -0.943067 | 0.030739727 | 1.922611142 | -5.57125 | 15.8533 | 15.5805 | 16.5597 | 15.5049 | 16.7602 | 16.5597 |
| P01867 | IGG2B_MOUSE | Ig gamma-2B chain C region OS=Mus musculus OX=10090 GN=Igh-3 PE=1 SV=3                                                 | 3  | 3  | + | A_C | 1.50181 | -2.38273  | 0.031491257 | 5.215226821 | -5.50117 | 10.6348 | 10.3106 | 10.0634 | 11.8494 | 13.2571 | 12.4538 |
| Q9D6J5 | NDUB8_MOUSE | NADH dehydrogenase [ubiquinone] 1 beta subcomplex subunit 8 mitochondrial OS=Mus musculus OX=10090 GN=Ndufb8 PE=1 SV=1 | 5  | 5  | + | A_C | 1.50162 | -0.727944 | 0.031505037 | 1.656277031 | -5.49991 | 14.8337 | 14.8386 | 15.691  | 15.8582 | 15.4318 | 15.6964 |
| P62702 | RS4X_MOUSE  | 40S ribosomal protein S4 X isoform OS=Mus musculus OX=10090 GN=Rps4x PE=1 SV=2                                         | 2  | 2  | + | A_C | 1.49941 | -1.38552  | 0.031665766 | 2.612661103 | -5.48523 | 11.3554 | 11.7731 | 12.664  | 12.0049 | 12.8078 | 13.0918 |
| P47811 | MK14_MOUSE  | Mitogen-activated protein kinase 14 OS=Mus musculus OX=10090 GN=Mapk14 PE=1 SV=3                                       | 3  | 3  | + | A_C | 1.4956  | -0.510536 | 0.031944787 | 1.424579367 | -5.46008 | 8.37504 | 8.30834 | 9.66711 | 8.42626 | 8.76487 | 8.93958 |
| O88844 | IDHC_MOUSE  | Isocitrate dehydrogenase [NADP] cytoplasmic OS=Mus musculus OX=10090 GN=Idh1 PE=1 SV=2                                 | 4  | 4  | + | A_C | 1.49431 | -1.19678  | 0.032039815 | 2.29227479  | -5.45155 | 11.9293 | 11.6303 | 12.6684 | 11.8572 | 12.8158 | 13.1373 |
| Q9WUR2 | ECI2_MOUSE  | Enoyl-CoA delta isomerase 2 OS=Mus musculus OX=10090 GN=Eci2 PE=1 SV=2                                                 | 3  | 3  | + | A_C | 1.49005 | -0.922753 | 0.03235564  | 1.89572934  | -5.42352 | 14.2732 | 13.9476 | 14.3373 | 14.7834 | 15.0826 | 14.9837 |
| Q61937 | NPM_MOUSE   | Nucleophosmin OS=Mus musculus OX=10090 GN=Npm1 PE=1 SV=1                                                               | 2  | 2  | + | A_C | 1.47736 | -0.878369 | 0.033315014 | 1.83829589  | -5.3409  | 10.4919 | 10.7313 | 11.4252 | 11.1737 | 11.6027 | 11.3772 |
| Q9DCW4 | ETFB_MOUSE  | Electron transfer flavoprotein subunit beta OS=Mus musculus OX=10090 GN=Etfb PE=1 SV=3                                 | 4  | 4  | + | A_C | 1.45931 | -0.67074  | 0.034728818 | 1.591889284 | -5.22528 | 17.4576 | 17.7073 | 18.2967 | 18.2696 | 18.2232 | 18.2832 |
| Q9JI39 | ABCBA_MOUSE | ATP-binding cassette sub-family B member 10 mitochondrial OS=Mus musculus OX=10090 GN=Abcb10 PE=1 SV=1                 | 4  | 4  | + | A_C | 1.45806 | -2.25649  | 0.034828919 | 4.778275376 | -5.21731 | 9.65105 | 10.1799 | 11.7566 | 11.3219 | 12.5142 | 11.8297 |
| Q8VIJ6 | SFPQ_MOUSE  | Splicing factor proline- and glutamine-rich OS=Mus musculus OX=10090 GN=Sfpq PE=1 SV=1                                 | 2  | 2  | + | A_C | 1.45357 | -0.238393 | 0.03519087  | 1.179677901 | -5.18895 | 10.1033 | 10.1293 | 9.81698 | 9.69174 | 10.3106 | 10.3987 |
| Q6PER3 | MARE3_MOUSE | Microtubule-associated protein RP/EB family member 3 OS=Mus musculus OX=10090 GN=Mapre3 PE=1 SV=1                      | 2  | 2  | + | A_C | 1.45132 | -1.09492  | 0.03537366  | 2.136012367 | -5.1748  | 9.0634  | 8.71425 | 9.19229 | 9.28309 | 10.1033 | 9.86419 |
| Q8K2I3 | FMO2_MOUSE  | Dimethylaniline monooxygenase [N-oxide-forming] 2 OS=Mus musculus OX=10090 GN=Fmo2 PE=1 SV=3                           | 2  | 2  | + | A_C | 1.4437  | 0.568656  | 0.035999793 | 0.674244615 | 5.12708  | 11.0901 | 11.2877 | 10.1548 | 10.4717 | 10.5699 | 10.6707 |
| Q91VH6 | MEMO1_MOUSE | Protein MEMO1 OS=Mus musculus OX=10090 GN=Memo1 PE=1 SV=1                                                              | 2  | 2  | + | A_C | 1.4406  | -0.653924 | 0.036257679 | 1.573442001 | -5.1078  | 8.52748 | 8.66178 | 9.22882 | 9.15482 | 9.35755 | 9.13955 |
| P63330 | PP2AA_MOUSE | Serine/threonine-protein phosphatase 2A catalytic subunit alpha isoform OS=Mus musculus OX=10090 GN=Ppp2ca PE=1 SV=1   | 6  | 1  | + | A_C | 1.43772 | -0.944699 | 0.036498919 | 1.924787262 | -5.0899  | 11.6393 | 11.9476 | 9.44087 | 11.446  | 12.6348 | 12.8416 |
| Q8R1B4 | EIF3C_MOUSE | Eukaryotic translation initiation factor 3 subunit C OS=Mus musculus OX=10090 GN=EIF3c PE=1 SV=1                       | 2  | 2  | + | A_C | 1.42567 | -0.402625 | 0.037525803 | 1.321910956 | -5.01575 | 10.1293 | 10.0362 | 11.2703 | 10.7228 | 10.5507 | 10.42   |
| Q9CZS1 | AL1B1_MOUSE | Aldehyde dehydrogenase X mitochondrial OS=Mus musculus OX=10090 GN=Alhd1b1 PE=1 SV=1                                   | 6  | 6  | + | A_C | 1.41644 | -0.959572 | 0.038331869 | 1.944732871 | -4.95962 | 11.4512 | 11.1485 | 11.3663 | 11.6883 | 12.1389 | 12.3799 |

|        |             |                                                                                                                          |    |    |   |     |         |           |             |             |          |         |         |         |         |         |         |
|--------|-------------|--------------------------------------------------------------------------------------------------------------------------|----|----|---|-----|---------|-----------|-------------|-------------|----------|---------|---------|---------|---------|---------|---------|
| Q99MI1 | RB6I2_MOUSE | ELKS/Rab6-interacting/CAST family member 1 OS=Mus musculus OX=10090 GN=Erc1 PE=1 SV=1                                    | 2  | 2  | + | A_C | 1.41132 | -0.764175 | 0.038786447 | 1.698398497 | -4.92872 | 9       | 8.69    | 9.11634 | 8.69697 | 9.60548 | 9.61287 |
| P80317 | TCPZ_MOUSE  | T-complex protein 1 subunit zeta OS=Mus musculus OX=10090 GN=Cct6a PE=1 SV=3                                             | 3  | 3  | + | A_C | 1.40763 | -0.451151 | 0.039117402 | 1.367130535 | -4.90654 | 10.0362 | 10.1799 | 11.1033 | 9.15228 | 10.5018 | 10.6165 |
| P70333 | HNRH2_MOUSE | Heterogeneous nuclear ribonucleoprotein H2 OS=Mus musculus OX=10090 GN=Hnrnp2 PE=1 SV=1                                  | 3  | 1  | + | A_C | 1.38931 | -1.32563  | 0.040802803 | 2.50642315  | -4.79774 | 9.05257 | 8.53528 | 9.89785 | 9.69697 | 10.0224 | 10.2167 |
| Q91YE8 | SYNP2_MOUSE | Synaptopodin-2 OS=Mus musculus OX=10090 GN=Synpo2 PE=1 SV=2                                                              | 9  | 9  | + | A_C | 1.38441 | -0.484961 | 0.041265774 | 1.399548031 | -4.76901 | 12.8688 | 12.6707 | 12.7875 | 12.5191 | 13.2318 | 13.2776 |
| Q80XB4 | NRAP_MOUSE  | Nebulin-related-anchoring protein OS=Mus musculus OX=10090 GN=Nrap PE=1 SV=3                                             | 9  | 9  | + | A_C | 1.38179 | -0.763886 | 0.041515474 | 1.698058309 | -4.75374 | 12.9819 | 13.3021 | 13.6662 | 13.4893 | 13.8918 | 13.92   |
| Q60854 | SPB6_MOUSE  | Serpin B6 OS=Mus musculus OX=10090 GN=Serpnb6 PE=1 SV=1                                                                  | 6  | 6  | + | A_C | 1.37591 | -0.776038 | 0.042081383 | 1.712421673 | -4.71954 | 12.2408 | 11.973  | 12.1453 | 12.3853 | 12.7875 | 12.9784 |
| Q9CQ54 | NDUC2_MOUSE | NADH dehydrogenase [ubiquinone] 1 subunit C2 OS=Mus musculus OX=10090 GN=Ndufc2 PE=1 SV=1                                | 2  | 2  | + | A_C | 1.3662  | -1.67183  | 0.043032839 | 3.186184919 | -4.66362 | 12.2288 | 12.1706 | 13.1861 | 13.9567 | 13.5142 | 14.2288 |
| P48036 | ANXA5_MOUSE | Annexin A5 OS=Mus musculus OX=10090 GN=Anxa5 PE=1 SV=1                                                                   | 4  | 4  | + | A_C | 1.36488 | -0.8661   | 0.043163833 | 1.822728899 | -4.65605 | 13.6883 | 13.3163 | 14.0102 | 13.6439 | 14.365  | 14.3718 |
| Q55RX1 | TM1L2_MOUSE | TOM1-like protein 2 OS=Mus musculus OX=10090 GN=Tom1l2 PE=1 SV=1                                                         | 2  | 2  | + | A_C | 1.36215 | -0.779094 | 0.043436018 | 1.716052868 | -4.64042 | 7.40939 | 7.72792 | 8.24317 | 7.35755 | 8.29462 | 8.40088 |
| Q11011 | PSA_MOUSE   | Puromycin-sensitive aminopeptidase OS=Mus musculus OX=10090 GN=Npepps PE=1 SV=2                                          | 6  | 6  | + | A_C | 1.35549 | -0.654981 | 0.044107252 | 1.574595216 | -4.60256 | 9.96578 | 9.75154 | 11.0084 | 10.2167 | 10.42   | 10.6073 |
| Q8BKE9 | IFT74_MOUSE | Intraflagellar transport protein 74 homolog OS=Mus musculus OX=10090 GN=ift74 PE=1 SV=2                                  | 2  | 2  | + | A_C | 1.34424 | -0.870433 | 0.045264737 | 1.828211524 | -4.53915 | 8.77149 | 9.07146 | 9.09276 | 8.50779 | 9.91139 | 9.67243 |
| Q9WVJ2 | PSD13_MOUSE | 26S proteasome non-ATPase regulatory subunit 13 OS=Mus musculus OX=10090 GN=Psm13 PE=1 SV=1                              | 5  | 5  | + | A_C | 1.33625 | -0.497382 | 0.04610521  | 1.411649574 | -4.49456 | 12.2732 | 12.0532 | 12.4818 | 12.5627 | 12.6484 | 12.6729 |
| Q9CXI0 | COQ5_MOUSE  | 2-methoxy-6-polyprenyl-1 4-benzoquinol methylase mitochondrial OS=Mus musculus OX=10090 GN=Coq5 PE=1 SV=2                | 4  | 4  | + | A_C | 1.32917 | -0.623242 | 0.046862991 | 1.540332705 | -4.45543 | 11.8138 | 12.0154 | 13.1611 | 12.1674 | 12.6348 | 12.4409 |
| Q9QXS1 | PLEC_MOUSE  | Plectin OS=Mus musculus OX=10090 GN=Plec PE=1 SV=3                                                                       | 46 | 46 | + | A_C | 1.3256  | -0.320806 | 0.047249803 | 1.249028157 | -4.43581 | 16.1965 | 16.0868 | 16.4087 | 16.3056 | 16.4153 | 16.5096 |
| P35486 | ODPA_MOUSE  | Pyruvate dehydrogenase E1 component subunit alpha somatic form mitochondrial OS=Mus musculus OX=10090 GN=Pdha1 PE=1 SV=1 | 6  | 6  | + | A_C | 1.30857 | -0.963436 | 0.049139417 | 1.949948471 | -4.34316 | 15.3443 | 14.9703 | 16.0102 | 15.3512 | 16.0014 | 16.24   |
| P09541 | MYL4_MOUSE  | Myosin light chain 4 OS=Mus musculus OX=10090 GN=Myl4 PE=1 SV=3                                                          | 4  | 4  | + | A_C | 1.30608 | -1.24452  | 0.049421964 | 2.369397087 | -4.32973 | 12.0327 | 11.5887 | 11.8727 | 12.1984 | 12.8727 | 13.2378 |

Table S4. List of quantified proteins significantly different between hearts of mice treated with (B and C) or without (A) 2DG intermittently for 8 months. Data used for GO analysis of biological processes and volcano plots, Table 2 and Figure 1, respectively.

| T: Accession | T: Entry | T: Description (B + C)/A                                                                                             | #Peptides | #Unique | C: Student's T-test <0.05 | C: Student's T-test <0.05 | N: -Log Student's T-test p-value Unt_Treated | N: Student's T-test Difference Unt_Treated | p value    | Treated/Untreated | N: Student's T-test Test statistic Unt_Treated |
|--------------|----------|----------------------------------------------------------------------------------------------------------------------|-----------|---------|---------------------------|---------------------------|----------------------------------------------|--------------------------------------------|------------|-------------------|------------------------------------------------|
| Q91VR5       | DDX1_M   | ATP-dependent RNA helicase DDX1 OS=Mus musculus OX=10090 GN=Ddx1 PE=1 SV=1                                           | 3         | 3       | +                         | Unt_Treated               | 1.9373                                       | 2.40136                                    | 0.01155314 | 0.18928605        | 4.41528                                        |
| A2AN08       | UBR4_M   | E3 ubiquitin-protein ligase UBR4 OS=Mus musculus OX=10090 GN=Ubr4 PE=1                                               | 4         | 4       | +                         | Unt_Treated               | 2.40953                                      | 1.00095                                    | 0.00389466 | 0.499670863       | 5.99489                                        |
| Q8K2I3       | FMO2_M   | Dimethylamine monooxygenase [N-oxide-forming] 2 OS=Mus musculus OX=10090 GN=Fmo2 PE=1 SV=3                           | 2         | 2       | +                         | Unt_Treated               | 1.81256                                      | 0.722161                                   | 0.01539714 | 0.606188757       | 4.05617                                        |
| Q9DBG3       | AP2B1_N  | AP-2 complex subunit beta OS=Mus musculus OX=10090 GN=Ap2b1 PE=1 SV=1                                                | 3         | 1       | +                         | Unt_Treated               | 1.50585                                      | 0.499063                                   | 0.03119967 | 0.707566181       | 3.25594                                        |
| Q8R081       | HNRPL_N  | Heterogeneous nuclear ribonucleoprotein L OS=Mus musculus OX=10090 GN=Hnrpl PE=1 SV=2                                | 4         | 4       | +                         | Unt_Treated               | 2.05482                                      | -0.232103                                  | 0.00881414 | 1.174545824       | -4.77401                                       |
| Q9QXS1       | PLEC_MC  | Plectin OS=Mus musculus OX=10090 GN=Plec PE=1 SV=3                                                                   | 46        | 46      | +                         | Unt_Treated               | 1.7109                                       | -0.268162                                  | 0.01945808 | 1.204272601       | -3.77867                                       |
| A2ASS6       | TITIN_M  | Titin OS=Mus musculus OX=10090 GN=Ttn PE=1 SV=1                                                                      | 516       | 516     | +                         | Unt_Treated               | 2.32564                                      | -0.338487                                  | 0.00472455 | 1.264429851       | -5.68575                                       |
| Q64471       | GSTT1_N  | Glutathione S-transferase theta-1 OS=Mus musculus OX=10090 GN=Gstt1                                                  | 2         | 2       | +                         | Unt_Treated               | 1.35069                                      | -0.346004                                  | 0.04459745 | 1.271035213       | -2.88924                                       |
| Q9WVJ2       | PSD13_N  | 26S proteasome non-ATPase regulatory subunit 13 OS=Mus musculus OX=10090 GN=Psm13 PE=1 SV=1                          | 5         | 5       | +                         | Unt_Treated               | 1.98748                                      | -0.428206                                  | 0.01029248 | 1.345559325       | -4.56592                                       |
| O35855       | BCAT2_N  | Branched-chain-amino-acid aminotransferase mitochondrial OS=Mus musculus OX=10090 GN=Bcat2 PE=1 SV=2                 | 4         | 4       | +                         | Unt_Treated               | 1.3774                                       | -0.446025                                  | 0.04193725 | 1.362281641       | -2.95076                                       |
| P70670       | NACAM_M  | Nascent polypeptide-associated complex subunit alpha muscle-specific form OS=Mus musculus OX=10090 GN=Naca PE=1 SV=2 | 19        | 19      | +                         | Unt_Treated               | 2.34553                                      | -0.459993                                  | 0.00451305 | 1.375535144       | -5.75781                                       |
| P47857       | PFKAM_I  | ATP-dependent 6-phosphofructokinase muscle type OS=Mus musculus OX=10090 GN=Pfkm PE=1 SV=3                           | 9         | 9       | +                         | Unt_Treated               | 1.50475                                      | -0.517613                                  | 0.03127879 | 1.43158467        | -3.25328                                       |
| P48722       | HS74L_N  | Heat shock 70 kDa protein 4L OS=Mus musculus OX=10090 GN=Hspa4l PE=1 SV=2                                            | 4         | 4       | +                         | Unt_Treated               | 1.69063                                      | -0.530757                                  | 0.02038778 | 1.444687042       | -3.72486                                       |
| Q68FD5       | CLH1_M   | Clathrin heavy chain 1 OS=Mus musculus OX=10090 GN=Cltc PE=1 SV=3                                                    | 23        | 23      | +                         | Unt_Treated               | 2.04664                                      | -0.541262                                  | 0.00898173 | 1.455244939       | -4.74835                                       |
| Q61702       | ITIH1_M  | Inter-alpha-trypsin inhibitor heavy chain H1 OS=Mus musculus OX=10090 GN=Itih1 PE=1 SV=2                             | 3         | 3       | +                         | Unt_Treated               | 1.3017                                       | -0.56004                                   | 0.04992292 | 1.474310093       | -2.77795                                       |
| P14152       | MDHC_N   | Malate dehydrogenase cytoplasmic OS=Mus musculus OX=10090 GN=Mdh1 PE=1 SV=3                                          | 7         | 7       | +                         | Unt_Treated               | 1.42471                                      | -0.571765                                  | 0.03760885 | 1.486340855       | -3.06136                                       |
| P17710       | HXK1_M   | Hexokinase-1 OS=Mus musculus OX=10090 GN=Hk1 PE=1 SV=3                                                               | 7         | 7       | +                         | Unt_Treated               | 1.94377                                      | -0.59429                                   | 0.0113823  | 1.509729413       | -4.43448                                       |
| Q9EQK5       | MVP_MC   | Major vault protein OS=Mus musculus OX=10090 GN=Mvp PE=1 SV=4                                                        | 7         | 7       | +                         | Unt_Treated               | 1.41356                                      | -0.599259                                  | 0.03858691 | 1.514938261       | -3.0351                                        |
| Q80XB4       | NRAP_M   | Nebulin-related-anchoring protein OS=Mus musculus OX=10090 GN=Nrap PE=1 SV=3                                         | 9         | 9       | +                         | Unt_Treated               | 1.52873                                      | -0.599837                                  | 0.02959852 | 1.515545326       | -3.31203                                       |
| P08032       | SPTA1_N  | Spectrin alpha chain erythrocytic 1 OS=Mus musculus OX=10090 GN=Spta1 PE=1 SV=3                                      | 15        | 15      | +                         | Unt_Treated               | 3.01751                                      | -0.600352                                  | 0.00096048 | 1.516086428       | -8.70139                                       |



|        |         |                                                                                                                            |    |    |   |             |         |           |            |             |          |
|--------|---------|----------------------------------------------------------------------------------------------------------------------------|----|----|---|-------------|---------|-----------|------------|-------------|----------|
| P49442 | INPP_MC | Inositol polyphosphate 1-phosphatase OS=Mus musculus OX=10090<br>GN=Inpp1 PE=1 SV=2                                        | 3  | 3  | + | Unt_Treated | 1.52814 | -0.601745 | 0.02963876 | 1.517550998 | -3.31056 |
| Q99MN9 | PCCB_MC | Propionyl-CoA carboxylase beta chain mitochondrial OS=Mus musculus<br>OX=10090 GN=Pccb PE=1 SV=2                           | 11 | 11 | + | Unt_Treated | 2.1594  | -0.607578 | 0.00692787 | 1.523699071 | -5.11129 |
| Q8BH61 | F13A_MC | Coagulation factor XIII A chain OS=Mus musculus OX=10090 GN=F13a1 PE=1                                                     | 4  | 4  | + | Unt_Treated | 1.59621 | -0.623968 | 0.02533903 | 1.541108033 | -3.48057 |
| P47791 | GSHR_M  | Glutathione reductase mitochondrial OS=Mus musculus OX=10090 GN=Gsr<br>PE=1 SV=3                                           | 2  | 2  | + | Unt_Treated | 2.19242 | -0.624995 | 0.00642066 | 1.542205481 | -5.22154 |
| Q91VH6 | MEMO1_M | Protein MEMO1 OS=Mus musculus OX=10090 GN=Memo1 PE=1 SV=1                                                                  | 2  | 2  | + | Unt_Treated | 2.73657 | -0.625557 | 0.00183413 | 1.542806362 | -7.34011 |
| P19123 | TNNC1_M | Troponin C slow skeletal and cardiac muscles OS=Mus musculus OX=10090<br>GN=Tnnc1 PE=1 SV=1                                | 2  | 2  | + | Unt_Treated | 1.36115 | -0.634947 | 0.04353615 | 1.552880701 | -2.91325 |
| Q8CGY6 | UN45B_M | Protein unc-45 homolog B OS=Mus musculus OX=10090 GN=Unc45b PE=1                                                           | 5  | 5  | + | Unt_Treated | 1.46726 | -0.645688 | 0.03409887 | 1.564485188 | -3.16259 |
| Q8BG32 | PSD11_M | 26S proteasome non-ATPase regulatory subunit 11 OS=Mus musculus<br>OX=10090 GN=Psm11 PE=1 SV=3                             | 4  | 4  | + | Unt_Treated | 1.71035 | -0.647996 | 0.01948274 | 1.566990029 | -3.7772  |
| P05201 | AATC_M  | Aspartate aminotransferase cytoplasmic OS=Mus musculus OX=10090<br>GN=Got1 PE=1 SV=3                                       | 5  | 5  | + | Unt_Treated | 1.33517 | -0.664185 | 0.04622001 | 1.584672815 | -2.85376 |
| Q62188 | DPYL3_M | Dihydropyrimidinase-related protein 3 OS=Mus musculus OX=10090<br>GN=Dpysl3 PE=1 SV=1                                      | 5  | 4  | + | Unt_Treated | 1.58792 | -0.678698 | 0.02582736 | 1.600694512 | -3.45959 |
| Q9DCW4 | ETFB_MC | Electron transfer flavoprotein subunit beta OS=Mus musculus OX=10090<br>GN=Etfb PE=1 SV=3                                  | 4  | 4  | + | Unt_Treated | 2.99038 | -0.685715 | 0.0010224  | 1.608498956 | -8.5606  |
| Q91VT4 | CBR4_MC | Carbonyl reductase family member 4 OS=Mus musculus OX=10090 GN=Cbr4<br>PE=1 SV=2                                           | 5  | 5  | + | Unt_Treated | 1.62788 | -0.714096 | 0.023557   | 1.640454978 | -3.56137 |
| Q61207 | SAP_MO  | Prosaposin OS=Mus musculus OX=10090 GN=Psap PE=1 SV=2                                                                      | 2  | 2  | + | Unt_Treated | 2.03361 | -0.715453 | 0.00925529 | 1.641998717 | -4.70773 |
| P13541 | MYH3_M  | Myosin-3 OS=Mus musculus OX=10090 GN=Myh3 PE=2 SV=2                                                                        | 12 | 3  | + | Unt_Treated | 1.30754 | -0.715562 | 0.0492561  | 1.642122278 | -2.79111 |
| Q60864 | STIP1_M | Stress-induced-phosphoprotein 1 OS=Mus musculus OX=10090 GN=Stip1                                                          | 5  | 5  | + | Unt_Treated | 1.50719 | -0.719767 | 0.03110355 | 1.646916031 | -3.25923 |
| Q9DBR7 | MYPT1_M | Protein phosphatase 1 regulatory subunit 12A OS=Mus musculus OX=10090<br>GN=Ppp1r12a PE=1 SV=2                             | 3  | 2  | + | Unt_Treated | 1.5469  | -0.721128 | 0.02838573 | 1.64847042  | -3.35693 |
| P05132 | KAPCA_M | cAMP-dependent protein kinase catalytic subunit alpha OS=Mus musculus<br>OX=10090 GN=Prkaca PE=1 SV=3                      | 3  | 3  | + | Unt_Treated | 1.4485  | -0.765817 | 0.0356041  | 1.700332626 | -3.11776 |
| P68040 | RACK1_M | Receptor of activated protein C kinase 1 OS=Mus musculus OX=10090<br>GN=Rack1 PE=1 SV=3                                    | 4  | 4  | + | Unt_Treated | 1.35387 | -0.774983 | 0.04427209 | 1.711169888 | -2.89652 |
| Q61937 | NPM_MC  | Nucleophosmin OS=Mus musculus OX=10090 GN=Npm1 PE=1 SV=1                                                                   | 2  | 2  | + | Unt_Treated | 2.17923 | -0.783114 | 0.00661866 | 1.720841235 | -5.17729 |
| P56399 | UBP5_M  | Ubiquitin carboxyl-terminal hydrolase 5 OS=Mus musculus OX=10090<br>GN=Usp5 PE=1 SV=1                                      | 7  | 7  | + | Unt_Treated | 2.84926 | -0.787357 | 0.00141495 | 1.725909719 | -7.86119 |
| Q9DC69 | NDUA9_M | NADH dehydrogenase [ubiquinone] 1 alpha subcomplex subunit 9<br>mitochondrial OS=Mus musculus OX=10090 GN=Ndufa9 PE=1 SV=2 | 6  | 6  | + | Unt_Treated | 1.94857 | -0.79182  | 0.01125719 | 1.731257115 | -4.44878 |
| P61202 | CSN2_M  | COP9 signalosome complex subunit 2 OS=Mus musculus OX=10090<br>GN=Cops2 PE=1 SV=1                                          | 3  | 3  | + | Unt_Treated | 1.34516 | -0.814705 | 0.04516895 | 1.75893845  | -2.87657 |
| P52480 | KPYM_M  | Pyruvate kinase PKM OS=Mus musculus OX=10090 GN=Pkm PE=1 SV=4                                                              | 13 | 13 | + | Unt_Treated | 1.4807  | -0.815856 | 0.03305978 | 1.760342313 | -3.19495 |
| Q9D6J5 | NDUB8_M | NADH dehydrogenase [ubiquinone] 1 beta subcomplex subunit 8<br>mitochondrial OS=Mus musculus OX=10090 GN=Ndufb8 PE=1 SV=1  | 5  | 5  | + | Unt_Treated | 2.48856 | -0.833188 | 0.00324668 | 1.781617952 | -6.29884 |
| Q8R2Q4 | RRF2M_M | Ribosome-releasing factor 2 mitochondrial OS=Mus musculus OX=10090<br>GN=Gfm2 PE=1 SV=2                                    | 6  | 6  | + | Unt_Treated | 1.39239 | -0.83823  | 0.04051445 | 1.787855329 | -2.98559 |
| Q9QYG0 | NDRG2_M | Protein NDRG2 OS=Mus musculus OX=10090 GN=Ndr2 PE=1 SV=1                                                                   | 7  | 7  | + | Unt_Treated | 2.17139 | -0.847811 | 0.00673923 | 1.799768066 | -5.15111 |

|        |         |                                                                                                                           |   |   |   |             |         |           |            |             |          |
|--------|---------|---------------------------------------------------------------------------------------------------------------------------|---|---|---|-------------|---------|-----------|------------|-------------|----------|
| Q922B2 | SYDC_M  | Aspartate--tRNA ligase cytoplasmic OS=Mus musculus OX=10090 GN=Dars1 PE=1 SV=2                                            | 6 | 6 | + | Unt_Treated | 1.32992 | -0.853759 | 0.04678213 | 1.807203538 | -2.8418  |
| Q9WTX5 | SKP1_M  | S-phase kinase-associated protein 1 OS=Mus musculus OX=10090 GN=Skp1 PE=1 SV=3                                            | 3 | 3 | + | Unt_Treated | 1.46781 | -0.864402 | 0.03405571 | 1.820584875 | -3.16393 |
| Q9D0E1 | HNRPM   | Heterogeneous nuclear ribonucleoprotein M OS=Mus musculus OX=10090 GN=Hnrpm PE=1 SV=3                                     | 8 | 8 | + | Unt_Treated | 1.5264  | -0.867925 | 0.02975774 | 1.825036098 | -3.30628 |
| Q99LC3 | NDUAA   | NADH dehydrogenase [ubiquinone] 1 alpha subcomplex subunit 10 mitochondrial OS=Mus musculus OX=10090 GN=Ndufa10 PE=1 SV=1 | 7 | 7 | + | Unt_Treated | 1.41059 | -0.873585 | 0.0388517  | 1.832210167 | -3.02814 |
| Q9D1X0 | NOL3_M  | Nucleolar protein 3 OS=Mus musculus OX=10090 GN=Nol3 PE=1 SV=1                                                            | 3 | 3 | + | Unt_Treated | 1.93249 | -0.876691 | 0.01168181 | 1.836159009 | -4.40103 |
| P26043 | RADI_M  | Radixin OS=Mus musculus OX=10090 GN=Rdx PE=1 SV=3                                                                         | 4 | 3 | + | Unt_Treated | 1.90946 | -0.878264 | 0.01231799 | 1.838162103 | -4.33326 |
| Q8BND5 | QSOX1_M | Sulfhydryl oxidase 1 OS=Mus musculus OX=10090 GN=Qsox1 PE=1 SV=1                                                          | 2 | 2 | + | Unt_Treated | 1.53101 | -0.879221 | 0.02944354 | 1.839381837 | -3.31762 |
| P18242 | CATD_M  | Cathepsin D OS=Mus musculus OX=10090 GN=Ctsd PE=1 SV=1                                                                    | 3 | 3 | + | Unt_Treated | 1.45104 | -0.884954 | 0.03539647 | 1.846705739 | -3.1238  |
| Q8BML9 | SYQ_MO  | Glutamine--tRNA ligase OS=Mus musculus OX=10090 GN=Qars1 PE=1 SV=1                                                        | 3 | 3 | + | Unt_Treated | 1.35759 | -0.889644 | 0.04389449 | 1.85271889  | -2.90506 |
| P09411 | PGK1_M  | Phosphoglycerate kinase 1 OS=Mus musculus OX=10090 GN=Pgk1 PE=1 SV=4                                                      | 6 | 6 | + | Unt_Treated | 1.68153 | -0.900005 | 0.02081949 | 1.86607245  | -3.70087 |
| Q80W93 | HYDIN_N | Hydrocephalus-inducing protein OS=Mus musculus OX=10090 GN=Hydin PE=1 SV=2                                                | 2 | 2 | + | Unt_Treated | 1.56595 | -0.905824 | 0.02716752 | 1.87361431  | -3.40438 |
| P40336 | VP26A_N | Vacuolar protein sorting-associated protein 26A OS=Mus musculus OX=10090 GN=Vps26a PE=1 SV=1                              | 5 | 5 | + | Unt_Treated | 2.01294 | -0.906802 | 0.00970644 | 1.87488486  | -4.64379 |
| Q61879 | MYH10_M | Myosin-10 OS=Mus musculus OX=10090 GN=Myh10 PE=1 SV=2                                                                     | 3 | 2 | + | Unt_Treated | 1.53568 | -0.907629 | 0.02912863 | 1.875959914 | -3.32916 |
| Q8R4N0 | CLYBL_M | Citramalyl-CoA lyase mitochondrial OS=Mus musculus OX=10090 GN=Clybl PE=1 SV=2                                            | 4 | 4 | + | Unt_Treated | 1.59122 | -0.911307 | 0.02563185 | 1.880748579 | -3.46792 |
| Q9CZ13 | QCR1_M  | Cytochrome b-c1 complex subunit 1 mitochondrial OS=Mus musculus OX=10090 GN=Uqcrc1 PE=1 SV=2                              | 7 | 7 | + | Unt_Treated | 1.9117  | -0.91255  | 0.01225462 | 1.882369696 | -4.33982 |
| P63085 | MK01_M  | Mitogen-activated protein kinase 1 OS=Mus musculus OX=10090 GN=Mapk1 PE=1 SV=3                                            | 2 | 2 | + | Unt_Treated | 1.45998 | -0.917703 | 0.03467528 | 1.889105142 | -3.14517 |
| P62334 | PRS10_N | 26S proteasome regulatory subunit 10B OS=Mus musculus OX=10090 GN=Psmc6 PE=1 SV=1                                         | 4 | 4 | + | Unt_Treated | 1.44803 | -0.922661 | 0.03564265 | 1.895608454 | -3.11662 |
| P35564 | CALX_M  | Calnexin OS=Mus musculus OX=10090 GN=Canx PE=1 SV=1                                                                       | 4 | 4 | + | Unt_Treated | 1.71062 | -0.923971 | 0.01947063 | 1.897330491 | -3.77792 |
| P97449 | AMPN_N  | Aminopeptidase N OS=Mus musculus OX=10090 GN=Anpep PE=1 SV=4                                                              | 3 | 3 | + | Unt_Treated | 1.30814 | -0.932181 | 0.04918809 | 1.908158483 | -2.79247 |
| Q9CRB8 | MTFP1_N | Mitochondrial fission process protein 1 OS=Mus musculus OX=10090 GN=Mtfp1 PE=1 SV=1                                       | 2 | 2 | + | Unt_Treated | 1.32576 | -0.935766 | 0.0472324  | 1.912906024 | -2.83236 |
| Q3UTJ2 | SRBS2_N | Sorbin and SH3 domain-containing protein 2 OS=Mus musculus OX=10090 GN=Sorbs2 PE=1 SV=2                                   | 2 | 2 | + | Unt_Treated | 1.65366 | -0.949986 | 0.02219934 | 1.931853911 | -3.62799 |
| Q62165 | DAG1_M  | Dystroglycan OS=Mus musculus OX=10090 GN=Dag1 PE=1 SV=4                                                                   | 3 | 3 | + | Unt_Treated | 1.56847 | -0.951269 | 0.02701034 | 1.933572688 | -3.4107  |
| P06151 | LDHA_M  | L-lactate dehydrogenase A chain OS=Mus musculus OX=10090 GN=Ldha PE=1 SV=3                                                | 5 | 5 | + | Unt_Treated | 1.81496 | -0.953271 | 0.01531228 | 1.936257732 | -4.06289 |
| P62897 | CYC_MO  | Cytochrome c somatic OS=Mus musculus OX=10090 GN=Cycc PE=1 SV=2                                                           | 2 | 2 | + | Unt_Treated | 1.50073 | -0.956752 | 0.03156967 | 1.940935263 | -3.24348 |
| P27773 | PDIA3_M | Protein disulfide-isomerase A3 OS=Mus musculus OX=10090 GN=Pdia3 PE=1 SV=2                                                | 4 | 4 | + | Unt_Treated | 1.65934 | -0.964516 | 0.02191089 | 1.951408747 | -3.64278 |
| Q8BU30 | SYIC_MO | Isoleucine--tRNA ligase cytoplasmic OS=Mus musculus OX=10090 GN=lars1 PE=1 SV=2                                           | 2 | 2 | + | Unt_Treated | 1.47866 | -0.968565 | 0.03321544 | 1.956893171 | -3.19002 |
| Q9JLT4 | TRXR2_N | Thioredoxin reductase 2 mitochondrial OS=Mus musculus OX=10090 GN=Txnrd2 PE=1 SV=4                                        | 6 | 5 | + | Unt_Treated | 1.39281 | -0.981322 | 0.04047529 | 1.974273687 | -2.98656 |

|        |         |                                                                                                                    |    |    |   |             |         |           |            |             |          |
|--------|---------|--------------------------------------------------------------------------------------------------------------------|----|----|---|-------------|---------|-----------|------------|-------------|----------|
| Q791V5 | MTCH2_I | Mitochondrial carrier homolog 2 OS=Mus musculus OX=10090 GN=Mtch2 PE=1 SV=1                                        | 5  | 5  | + | Unt_Treated | 1.66597 | -0.988976 | 0.02157893 | 1.984775731 | -3.66007 |
| Q99L43 | CDS2_M  | Phosphatidate cytidyltransferase 2 OS=Mus musculus OX=10090 GN=Cds2 PE=1 SV=1                                      | 2  | 2  | + | Unt_Treated | 1.92882 | -0.996348 | 0.01178094 | 1.994943655 | -4.39018 |
| P47802 | MTX1_M  | Metaxin-1 OS=Mus musculus OX=10090 GN=Mtx1 PE=1 SV=1                                                               | 3  | 3  | + | Unt_Treated | 1.48237 | -1.00348  | 0.0329329  | 2.004830128 | -3.19898 |
| Q8K310 | MATR3_I | Matrin-3 OS=Mus musculus OX=10090 GN=Matr3 PE=1 SV=1                                                               | 3  | 3  | + | Unt_Treated | 1.90516 | -1.0144   | 0.01244056 | 2.020062598 | -4.3207  |
| Q9CY73 | RM44_M  | 39S ribosomal protein L44 mitochondrial OS=Mus musculus OX=10090 GN=Mrpl44 PE=1 SV=3                               | 2  | 2  | + | Unt_Treated | 1.54022 | -1.04184  | 0.02882571 | 2.05885182  | -3.34038 |
| Q02257 | PLAK_M  | Junction plakoglobin OS=Mus musculus OX=10090 GN=Jup PE=1 SV=3                                                     | 7  | 7  | + | Unt_Treated | 1.94956 | -1.0531   | 0.01123156 | 2.074983695 | -4.45174 |
| P70168 | IMB1_M  | Importin subunit beta-1 OS=Mus musculus OX=10090 GN=Kpnb1 PE=1 SV=2                                                | 6  | 6  | + | Unt_Treated | 2.04849 | -1.06613  | 0.00894355 | 2.093809227 | -4.75414 |
| P62702 | RS4X_M  | 40S ribosomal protein S4 X isoform OS=Mus musculus OX=10090 GN=Rps4x PE=1 SV=2                                     | 2  | 2  | + | Unt_Treated | 1.36699 | -1.07787  | 0.04295463 | 2.110917214 | -2.9267  |
| Q9Z1E4 | GYS1_M  | Glycogen [starch] synthase muscle OS=Mus musculus OX=10090 GN=Gys1 PE=1 SV=2                                       | 8  | 8  | + | Unt_Treated | 1.47467 | -1.08651  | 0.03352201 | 2.123596988 | -3.18042 |
| Q76LL6 | FHOD3_I | FH1/FH2 domain-containing protein 3 OS=Mus musculus OX=10090 GN=Fhod3 PE=1 SV=1                                    | 4  | 4  | + | Unt_Treated | 1.70879 | -1.11066  | 0.01955285 | 2.159444143 | -3.77304 |
| Q8K1M6 | DNM1L_I | Dynamin-1-like protein OS=Mus musculus OX=10090 GN=Dnm1l PE=1 SV=2                                                 | 12 | 12 | + | Unt_Treated | 2.30751 | -1.11533  | 0.00492595 | 2.166445584 | -5.62069 |
| Q3TZZ7 | ESYT2_M | Extended synaptotagmin-2 OS=Mus musculus OX=10090 GN=Esyt2 PE=1 SV=1                                               | 2  | 2  | + | Unt_Treated | 2.20144 | -1.13832  | 0.00628869 | 2.201245416 | -5.252   |
| Q64310 | SURF4_N | Surfeit locus protein 4 OS=Mus musculus OX=10090 GN=Surf4 PE=1 SV=1                                                | 2  | 2  | + | Unt_Treated | 1.55364 | -1.1413   | 0.0279486  | 2.205796961 | -3.37368 |
| Q61171 | PRDX2_N | Peroxisedoxin-2 OS=Mus musculus OX=10090 GN=Prdx2 PE=1 SV=3                                                        | 5  | 5  | + | Unt_Treated | 2.02449 | -1.15458  | 0.0094517  | 2.226195048 | -4.67944 |
| P70333 | HNRH2_I | Heterogeneous nuclear ribonucleoprotein H2 OS=Mus musculus OX=10090 GN=Hnrrph2 PE=1 SV=1                           | 3  | 1  | + | Unt_Treated | 2.16    | -1.16456  | 0.00691831 | 2.241648383 | -5.1133  |
| Q8R010 | AIMP2_N | Aminoacyl tRNA synthase complex-interacting multifunctional protein 2 OS=Mus musculus OX=10090 GN=Aimp2 PE=1 SV=2  | 3  | 3  | + | Unt_Treated | 1.41534 | -1.17815  | 0.03842908 | 2.262864188 | -3.03928 |
| Q9CWD8 | NUBPL_N | Iron-sulfur protein NUBPL OS=Mus musculus OX=10090 GN=Nubpl PE=1 SV=2                                              | 2  | 2  | + | Unt_Treated | 2.0087  | -1.18022  | 0.00980167 | 2.266113309 | -4.63075 |
| P62259 | 1433E_N | 14-3-3 protein epsilon OS=Mus musculus OX=10090 GN=Ywhae PE=1 SV=1                                                 | 5  | 5  | + | Unt_Treated | 2.36862 | -1.18959  | 0.00427937 | 2.280879136 | -5.84245 |
| Q91YM4 | FAKD4_N | FAST kinase domain-containing protein 4 OS=Mus musculus OX=10090 GN=Tbrg4 PE=1 SV=1                                | 2  | 2  | + | Unt_Treated | 2.08864 | -1.1933   | 0.0081538  | 2.286752138 | -4.88117 |
| P38060 | HMGCL_I | Hydroxymethylglutaryl-CoA lyase mitochondrial OS=Mus musculus OX=10090 GN=Hmgcl PE=1 SV=2                          | 3  | 3  | + | Unt_Treated | 1.81956 | -1.20072  | 0.01515095 | 2.298543549 | -4.07576 |
| Q9R0Y5 | KAD1_M  | Adenylate kinase isoenzyme 1 OS=Mus musculus OX=10090 GN=Ak1 PE=1 SV=1                                             | 5  | 5  | + | Unt_Treated | 1.33488 | -1.20083  | 0.04625088 | 2.298718811 | -2.85309 |
| Q8CI94 | PYGB_M  | Glycogen phosphorylase brain form OS=Mus musculus OX=10090 GN=Pygb PE=1 SV=3                                       | 18 | 14 | + | Unt_Treated | 2.37018 | -1.22656  | 0.00426403 | 2.340083484 | -5.8482  |
| P51667 | MLRV_M  | Myosin regulatory light chain 2 ventricular/cardiac muscle isoform OS=Mus musculus OX=10090 GN=Myl2 PE=1 SV=3      | 8  | 8  | + | Unt_Treated | 1.60839 | -1.2369   | 0.02463826 | 2.356915441 | -3.51152 |
| Q9CZW5 | TOM70_I | Mitochondrial import receptor subunit TOM70 OS=Mus musculus OX=10090 GN=Tomm70 PE=1 SV=2                           | 5  | 5  | + | Unt_Treated | 2.00508 | -1.2413   | 0.00988371 | 2.364114647 | -4.61964 |
| Q59J78 | NDUF2_I | NADH dehydrogenase [ubiquinone] 1 alpha subcomplex assembly factor 2 OS=Mus musculus OX=10090 GN=Ndufaf2 PE=1 SV=1 | 2  | 2  | + | Unt_Treated | 1.64751 | -1.26449  | 0.02251594 | 2.40242268  | -3.61202 |

|        |         |                                                                                                                  |   |   |   |             |         |          |            |             |          |
|--------|---------|------------------------------------------------------------------------------------------------------------------|---|---|---|-------------|---------|----------|------------|-------------|----------|
| P80316 | TCPE_M  | T-complex protein 1 subunit epsilon OS=Mus musculus OX=10090 GN=Cct5 PE=1 SV=1                                   | 4 | 4 | + | Unt_Treated | 1.66613 | -1.28913 | 0.02157099 | 2.443806403 | -3.66049 |
| P98192 | GNPAT_I | Dihydroxyacetone phosphate acyltransferase OS=Mus musculus OX=10090 GN=Gnpat PE=1 SV=1                           | 5 | 5 | + | Unt_Treated | 3.34116 | -1.31136 | 0.00045587 | 2.481753798 | -10.5546 |
| P17751 | TPIS_MO | Triosephosphate isomerase OS=Mus musculus OX=10090 GN=Tpi1 PE=1 SV=4                                             | 8 | 8 | + | Unt_Treated | 2.25198 | -1.31735 | 0.00559783 | 2.49207934  | -5.42515 |
| P61211 | ARL1_M  | ADP-ribosylation factor-like protein 1 OS=Mus musculus OX=10090 GN=Arl1 PE=1 SV=1                                | 2 | 2 | + | Unt_Treated | 1.42052 | -1.32873 | 0.03797345 | 2.511814633 | -3.05147 |
| Q91WD5 | NDUS2_I | NADH dehydrogenase [ubiquinone] iron-sulfur protein 2 mitochondrial OS=Mus musculus OX=10090 GN=Ndufs2 PE=1 SV=1 | 6 | 6 | + | Unt_Treated | 1.3957  | -1.34113 | 0.04020685 | 2.533496788 | -2.9933  |
| Q99JY3 | GIMA4_I | GTPase IMAP family member 4 OS=Mus musculus OX=10090 GN=Gimap4 PE=1 SV=2                                         | 2 | 2 | + | Unt_Treated | 1.57258 | -1.36364 | 0.02675593 | 2.573336282 | -3.42098 |
| Q61425 | HCDH_M  | Hydroxyacyl-coenzyme A dehydrogenase mitochondrial OS=Mus musculus OX=10090 GN=Hadh PE=1 SV=2                    | 5 | 5 | + | Unt_Treated | 1.62343 | -1.3725  | 0.02379962 | 2.589188498 | -3.54996 |
| P82198 | BGH3_M  | Transforming growth factor-beta-induced protein ig-h3 OS=Mus musculus OX=10090 GN=Tgfb1 PE=1 SV=1                | 3 | 3 | + | Unt_Treated | 1.42974 | -1.37338 | 0.03717577 | 2.590768306 | -3.07323 |
| Q9Z2Z6 | MCAT_M  | Mitochondrial carnitine/acylcarnitine carrier protein OS=Mus musculus OX=10090 GN=Slc25a20 PE=1 SV=1             | 2 | 2 | + | Unt_Treated | 1.53844 | -1.38817 | 0.0289441  | 2.617464554 | -3.33596 |
| P21550 | ENOB_M  | Beta-enolase OS=Mus musculus OX=10090 GN=Eno3 PE=1 SV=3                                                          | 9 | 5 | + | Unt_Treated | 1.75261 | -1.40937 | 0.01767624 | 2.656211453 | -3.89095 |
| P62821 | RAB1A_I | Ras-related protein Rab-1A OS=Mus musculus OX=10090 GN=Rab1A PE=1 SV=3                                           | 2 | 2 | + | Unt_Treated | 1.87107 | -1.51367 | 0.01345643 | 2.855354755 | -4.22196 |
| Q9CQ54 | NDUC2_I | NADH dehydrogenase [ubiquinone] 1 subunit C2 OS=Mus musculus OX=10090 GN=Ndufc2 PE=1 SV=1                        | 2 | 2 | + | Unt_Treated | 1.92514 | -1.52179 | 0.01188119 | 2.871471017 | -4.37933 |
| Q8VE38 | OXND1_I | Oxidoreductase NAD-binding domain-containing protein 1 OS=Mus musculus OX=10090 GN=Oxnad1 PE=1 SV=2              | 2 | 2 | + | Unt_Treated | 1.99151 | -1.56732 | 0.01019741 | 2.963536857 | -4.57818 |
| Q8QZ51 | HIBCH_M | 3-hydroxyisobutyryl-CoA hydrolase mitochondrial OS=Mus musculus OX=10090 GN=Hibch PE=1 SV=1                      | 3 | 3 | + | Unt_Treated | 1.61227 | -1.5788  | 0.02441912 | 2.98721277  | -3.52141 |
| O89020 | AFAM_M  | Afamin OS=Mus musculus OX=10090 GN=Afm PE=1 SV=2                                                                 | 4 | 4 | + | Unt_Treated | 1.61109 | -1.57911 | 0.02448556 | 2.987854718 | -3.51839 |
| Q8BG95 | MYPT2_I | Protein phosphatase 1 regulatory subunit 12B OS=Mus musculus OX=10090 GN=Ppp1r12b PE=1 SV=2                      | 4 | 3 | + | Unt_Treated | 1.45481 | -1.617   | 0.03509054 | 3.067365319 | -3.1328  |
| Q9R0Q6 | ARC1A_I | Actin-related protein 2/3 complex subunit 1A OS=Mus musculus OX=10090 GN=Arpc1a PE=1 SV=1                        | 3 | 3 | + | Unt_Treated | 1.38159 | -1.62469 | 0.0415346  | 3.083758955 | -2.96048 |
| P12787 | COX5A_I | Cytochrome c oxidase subunit 5A mitochondrial OS=Mus musculus OX=10090 GN=Cox5a PE=1 SV=2                        | 4 | 4 | + | Unt_Treated | 1.40199 | -1.62997 | 0.03962872 | 3.095065626 | -3.00799 |
| G5E8K5 | ANK3_M  | Ankyrin-3 OS=Mus musculus OX=10090 GN=Ank3 PE=1 SV=1                                                             | 3 | 1 | + | Unt_Treated | 1.8811  | -1.67078 | 0.01314922 | 3.183866843 | -4.25085 |
| Q62448 | IF4G2_M | Eukaryotic translation initiation factor 4 gamma 2 OS=Mus musculus OX=10090 GN=Eif4g2 PE=1 SV=2                  | 2 | 2 | + | Unt_Treated | 1.64417 | -1.69847 | 0.02268977 | 3.245565788 | -3.60338 |
| Q9D7A8 | ARMC1_I | Armadillo repeat-containing protein 1 OS=Mus musculus OX=10090 GN=Armc1 PE=1 SV=1                                | 3 | 3 | + | Unt_Treated | 2.48861 | -1.80602 | 0.00324631 | 3.496762957 | -6.29905 |
| Q9D1D4 | TMEDA_I | Transmembrane emp24 domain-containing protein 10 OS=Mus musculus OX=10090 GN=Tmed10 PE=1 SV=1                    | 2 | 2 | + | Unt_Treated | 2.35302 | -1.84274 | 0.00443588 | 3.586906154 | -5.78516 |
| Q9JI39 | ABCBA_I | ATP-binding cassette sub-family B member 10 mitochondrial OS=Mus musculus OX=10090 GN=Abcb10 PE=1 SV=1           | 4 | 4 | + | Unt_Treated | 2.06518 | -1.94013 | 0.00860637 | 3.837402247 | -4.80664 |

|        |         |                                                                                    |   |   |   |             |         |          |            |             |          |
|--------|---------|------------------------------------------------------------------------------------|---|---|---|-------------|---------|----------|------------|-------------|----------|
| P10518 | HEM2_M  | Delta-aminolevulinic acid dehydratase OS=Mus musculus OX=10090 GN=Alad PE=1 SV=1   | 3 | 3 | + | Unt_Treated | 1.79795 | -1.98887 | 0.01592392 | 3.969259816 | -4.01548 |
| Q3V1L4 | 5NTC_MI | Cytosolic purine 5'-nucleotidase OS=Mus musculus OX=10090 GN=Nt5c2 PE=1 SV=2       | 2 | 2 | + | Unt_Treated | 1.39003 | -2.10105 | 0.04073521 | 4.290215152 | -2.98009 |
| Q3V3R4 | ITA1_MC | Integrin alpha-1 OS=Mus musculus OX=10090 GN=Itga1 PE=1 SV=2                       | 3 | 3 | + | Unt_Treated | 1.39411 | -2.16157 | 0.04035432 | 4.474014711 | -2.98958 |
| P29758 | OAT_MO  | Ornithine aminotransferase mitochondrial OS=Mus musculus OX=10090 GN=Oat PE=1 SV=1 | 7 | 7 | + | Unt_Treated | 2.61484 | -2.37832 | 0.0024275  | 5.199309366 | -6.81175 |
| O35344 | IMA4_MI | Importin subunit alpha-4 OS=Mus musculus OX=10090 GN=Kpna3 PE=1 SV=1               | 3 | 3 | + | Unt_Treated | 1.3881  | -2.68357 | 0.04091664 | 6.424436864 | -2.97559 |
| Q62000 | MIME_M  | Mimecan OS=Mus musculus OX=10090 GN=Ogn PE=1 SV=1                                  | 2 | 2 | + | Unt_Treated | 2.85092 | -4.58988 | 0.00140955 | 24.0819448  | -7.86909 |

**Table S5. Relative abundance of proteins in murine heart and lung.** Total protein from heart or lung homogenates was analysed by mass spectrometry. The values are relative abundance; A - controls, B and C - mice treated with 2DG. The data in Table S1 are derived from this complete list.

| Accession | Description | Heart   |         |         |         |         |         | Lung    |         |         |         |         |         |
|-----------|-------------|---------|---------|---------|---------|---------|---------|---------|---------|---------|---------|---------|---------|
|           |             | A4      | A6      | B21     | B20     | C34     | C35     | A1      | A2      | B17     | B19     | C33     | C34     |
| Q3TCH7    | CUL4A_MOUSE | 0.00115 | 0.00088 | 0.00076 | 0.00052 | 0.00058 | 0.00134 | 0.02897 | 0.01662 | 0.02827 | 0.03124 | 0.03320 | 0.02640 |
| A2A5R2    | BIG2_MOUSE  | 0.00000 | 0.00000 | 0.00000 | 0.00000 | 0.00000 | 0.00000 | 0.00484 | 0.00281 | 0.00310 | 0.00295 | 0.00655 | 0.00539 |
| A2A8L5    | PTPRF_MOUSE | 0.00000 | 0.00000 | 0.00000 | 0.00000 | 0.00000 | 0.00000 | 0.00000 | 0.00045 | 0.00046 | 0.00031 | 0.00000 | 0.00000 |
| A2A8Z1    | OSBL9_MOUSE | 0.00000 | 0.00000 | 0.00000 | 0.00000 | 0.00000 | 0.00000 | 0.00564 | 0.00848 | 0.00673 | 0.00757 | 0.00880 | 0.00819 |
| A2AAJ9    | OBSCN_MOUSE | 0.13668 | 0.17473 | 0.13010 | 0.15088 | 0.16738 | 0.15547 | 0.00051 | 0.00098 | 0.00000 | 0.00407 | 0.00190 | 0.00166 |
| A2ABU4    | MYOM3_MOUSE | 0.00000 | 0.00000 | 0.00000 | 0.00000 | 0.00000 | 0.00000 | 0.01859 | 0.00000 | 0.00147 | 0.00000 | 0.00261 | 0.00321 |
| A2ADY9    | DDI2_MOUSE  | 0.00000 | 0.00000 | 0.00000 | 0.00000 | 0.00000 | 0.00000 | 0.00772 | 0.01003 | 0.01647 | 0.01220 | 0.01982 | 0.01610 |
| A2AGT5    | CKAP5_MOUSE | 0.00000 | 0.00000 | 0.00000 | 0.00000 | 0.00000 | 0.00000 | 0.04235 | 0.09712 | 0.07070 | 0.07052 | 0.06654 | 0.03975 |
| A2AJI0    | MA7D1_MOUSE | 0.00000 | 0.00000 | 0.00000 | 0.00000 | 0.00000 | 0.00000 | 0.00354 | 0.00755 | 0.00328 | 0.00176 | 0.00271 | 0.00574 |
| A2AJL3    | FGGY_MOUSE  | 0.00000 | 0.00000 | 0.00000 | 0.00000 | 0.00000 | 0.00000 | 0.00000 | 0.00000 | 0.00024 | 0.00016 | 0.00000 | 0.00000 |
| A2AKK5    | ACNT1_MOUSE | 0.00000 | 0.00000 | 0.00000 | 0.00000 | 0.00000 | 0.00000 | 0.00000 | 0.00000 | 0.00818 | 0.00000 | 0.00000 | 0.01196 |
| A2AMM0    | CAVN4_MOUSE | 0.00669 | 0.01315 | 0.00772 | 0.00713 | 0.01356 | 0.00567 | 0.00612 | 0.00000 | 0.00199 | 0.00271 | 0.00361 | 0.00092 |
| A2AN08    | UBR4_MOUSE  | 0.00610 | 0.00825 | 0.00275 | 0.00274 | 0.00207 | 0.00276 | 0.01099 | 0.00629 | 0.01190 | 0.00921 | 0.01131 | 0.00759 |
| A2APV2    | FMNL2_MOUSE | 0.00000 | 0.00000 | 0.00000 | 0.00000 | 0.00000 | 0.00000 | 0.01326 | 0.01099 | 0.01069 | 0.00970 | 0.00911 | 0.01075 |
| A2AQ25    | SKT_MOUSE   | 0.00000 | 0.00000 | 0.00000 | 0.00000 | 0.00000 | 0.00000 | 0.00000 | 0.00176 | 0.00160 | 0.00126 | 0.00315 | 0.00085 |
| A2ARA8    | ITA8_MOUSE  | 0.00000 | 0.00000 | 0.00000 | 0.00000 | 0.00000 | 0.00000 | 0.01668 | 0.03794 | 0.04194 | 0.03432 | 0.04470 | 0.04153 |
| A2ARV4    | LRP2_MOUSE  | 0.00000 | 0.00000 | 0.00000 | 0.00000 | 0.00000 | 0.00000 | 0.00030 | 0.00002 | 0.00047 | 0.00007 | 0.00031 | 0.00015 |
| A2ASQ1    | AGRIN_MOUSE | 0.00889 | 0.00884 | 0.00763 | 0.00920 | 0.00675 | 0.00567 | 0.02745 | 0.01960 | 0.02738 | 0.01835 | 0.03019 | 0.03063 |
| A2ASS6    | TITIN_MOUSE | 6.96078 | 9.42445 | 7.41544 | 7.76892 | 7.41862 | 7.00918 | 0.23722 | 0.03060 | 0.02915 | 0.04019 | 0.02329 | 0.02295 |
| A2ATU0    | DHTK1_MOUSE | 0.00000 | 0.00000 | 0.00000 | 0.00000 | 0.00000 | 0.00000 | 0.00000 | 0.00000 | 0.00000 | 0.00000 | 0.00000 | 0.00000 |
| A2AUC9    | KLH41_MOUSE | 0.00000 | 0.00000 | 0.00000 | 0.00000 | 0.00000 | 0.00000 | 0.01005 | 0.00000 | 0.00000 | 0.00000 | 0.00000 | 0.00000 |
| A2AVZ9    | S43A3_MOUSE | 0.00000 | 0.00000 | 0.00000 | 0.00000 | 0.00000 | 0.00000 | 0.01555 | 0.01817 | 0.01316 | 0.01458 | 0.01256 | 0.01840 |
| A2AWA9    | RBGP1_MOUSE | 0.00000 | 0.00000 | 0.00000 | 0.00000 | 0.00000 | 0.00000 | 0.00394 | 0.00580 | 0.00555 | 0.00625 | 0.00513 | 0.00488 |
| P11588    | MUP1_MOUSE  | 0.00000 | 0.00000 | 0.00000 | 0.00000 | 0.00000 | 0.00000 | 0.00000 | 0.00000 | 0.00000 | 0.00000 | 0.00000 | 0.00000 |
| A3KGV1    | ODFP2_MOUSE | 0.00000 | 0.00000 | 0.00000 | 0.00000 | 0.00000 | 0.00000 | 0.00000 | 0.00000 | 0.00199 | 0.00000 | 0.00000 | 0.00000 |
| A3KMP2    | TTC38_MOUSE | 0.00884 | 0.00843 | 0.00940 | 0.00332 | 0.02627 | 0.00799 | 0.01135 | 0.01560 | 0.01872 | 0.01608 | 0.01896 | 0.01773 |
| A6H6E2    | MMRN2_MOUSE | 0.00189 | 0.00089 | 0.00150 | 0.00103 | 0.00189 | 0.00245 | 0.00492 | 0.00461 | 0.00956 | 0.00372 | 0.00924 | 0.00526 |
| A6PWW4    | WDR76_MOUSE | 0.00000 | 0.00000 | 0.00000 | 0.00000 | 0.00000 | 0.00000 | 0.03020 | 0.02352 | 0.01219 | 0.02059 | 0.01791 | 0.01224 |
| A6X8Z5    | RHG31_MOUSE | 0.00000 | 0.00000 | 0.00000 | 0.00000 | 0.00000 | 0.00000 | 0.00056 | 0.00540 | 0.00910 | 0.00478 | 0.00429 | 0.00587 |
| A6X935    | ITIH4_MOUSE | 0.14253 | 0.16484 | 0.09039 | 0.13209 | 0.09136 | 0.18981 | 0.01045 | 0.00776 | 0.00814 | 0.01091 | 0.01053 | 0.00523 |
| B1AVD1    | XPP2_MOUSE  | 0.00000 | 0.00000 | 0.00000 | 0.00000 | 0.00000 | 0.00000 | 0.00187 | 0.00464 | 0.00281 | 0.00188 | 0.00000 | 0.00356 |
| B1AY13    | UBP24_MOUSE | 0.00000 | 0.00000 | 0.00000 | 0.00000 | 0.00000 | 0.00000 | 0.01524 | 0.01277 | 0.02213 | 0.01499 | 0.01852 | 0.01694 |

|        |             |         |         |         |         |         |         |         |         |         |         |         |         |
|--------|-------------|---------|---------|---------|---------|---------|---------|---------|---------|---------|---------|---------|---------|
| B2RQC6 | PYR1_MOUSE  | 0.00000 | 0.00000 | 0.00000 | 0.00000 | 0.00000 | 0.00000 | 0.00451 | 0.00550 | 0.00403 | 0.00424 | 0.00411 | 0.00392 |
| B2RSH2 | GNAI1_MOUSE | 0.00000 | 0.00000 | 0.00000 | 0.00000 | 0.00000 | 0.00000 | 0.00904 | 0.00821 | 0.00628 | 0.00680 | 0.00783 | 0.00933 |
| B2RUR8 | OTU7B_MOUSE | 0.00000 | 0.00000 | 0.00000 | 0.00000 | 0.00000 | 0.00000 | 0.00067 | 0.00303 | 0.00215 | 0.00178 | 0.00000 | 0.00081 |
| B2RX12 | MRP3_MOUSE  | 0.00000 | 0.00000 | 0.00000 | 0.00000 | 0.00000 | 0.00000 | 0.00773 | 0.00460 | 0.00598 | 0.00598 | 0.00630 | 0.00707 |
| B2RXC1 | TPC11_MOUSE | 0.00000 | 0.00000 | 0.00000 | 0.00000 | 0.00000 | 0.00000 | 0.00000 | 0.00000 | 0.00000 | 0.00000 | 0.00000 | 0.00000 |
| B2RXR6 | ANR44_MOUSE | 0.00000 | 0.00000 | 0.00000 | 0.00000 | 0.00000 | 0.00000 | 0.00913 | 0.00949 | 0.00605 | 0.00845 | 0.00372 | 0.00889 |
| B2RXS4 | PLXB2_MOUSE | 0.00179 | 0.00150 | 0.00080 | 0.00089 | 0.00092 | 0.00091 | 0.00552 | 0.00622 | 0.01192 | 0.00800 | 0.00872 | 0.00774 |
| B2RY56 | RBM25_MOUSE | 0.00000 | 0.00000 | 0.00000 | 0.00000 | 0.00000 | 0.00000 | 0.00064 | 0.00344 | 0.00695 | 0.00608 | 0.00207 | 0.00182 |
| B8JK39 | ITA9_MOUSE  | 0.00000 | 0.00000 | 0.00000 | 0.00000 | 0.00000 | 0.00000 | 0.00000 | 0.00000 | 0.00000 | 0.00000 | 0.00000 | 0.00000 |
| B9EJ86 | OSBL8_MOUSE | 0.00000 | 0.00000 | 0.00000 | 0.00000 | 0.00000 | 0.00000 | 0.01506 | 0.01443 | 0.01868 | 0.00994 | 0.01707 | 0.01743 |
| C0HKG6 | RNT2B_MOUSE | 0.00000 | 0.00000 | 0.00000 | 0.00000 | 0.00000 | 0.00000 | 0.00000 | 0.00037 | 0.00073 | 0.00000 | 0.00060 | 0.00075 |
| D3YVF0 | AKAP5_MOUSE | 0.00000 | 0.00000 | 0.00000 | 0.00000 | 0.00000 | 0.00000 | 0.04282 | 0.06631 | 0.06092 | 0.05954 | 0.08001 | 0.05142 |
| D3YXK2 | SAFB1_MOUSE | 0.00000 | 0.00000 | 0.00000 | 0.00000 | 0.00000 | 0.00000 | 0.00380 | 0.00533 | 0.00442 | 0.00530 | 0.00662 | 0.00689 |
| D3YZP9 | CCDC6_MOUSE | 0.00000 | 0.00000 | 0.00000 | 0.00000 | 0.00000 | 0.00000 | 0.00094 | 0.00497 | 0.00065 | 0.00336 | 0.00034 | 0.00195 |
| D3Z6Q9 | BIN2_MOUSE  | 0.00000 | 0.00000 | 0.00000 | 0.00000 | 0.00000 | 0.00000 | 0.01147 | 0.00567 | 0.01869 | 0.02052 | 0.01230 | 0.01476 |
| D3Z7P3 | GLSK_MOUSE  | 0.01341 | 0.01334 | 0.00887 | 0.00898 | 0.00913 | 0.00858 | 0.00516 | 0.00776 | 0.01116 | 0.00788 | 0.00535 | 0.00849 |
| Q9JIY8 | NT8F3_MOUSE | 0.00000 | 0.00000 | 0.00000 | 0.00000 | 0.00000 | 0.00000 | 0.00000 | 0.00000 | 0.00000 | 0.00000 | 0.00000 | 0.00000 |
| E9PV24 | FIBA_MOUSE  | 0.00734 | 0.00170 | 0.00168 | 0.00696 | 0.00217 | 0.00075 | 0.08094 | 0.02839 | 0.04144 | 0.05326 | 0.07907 | 0.01924 |
| E9PVA8 | GCN1_MOUSE  | 0.00000 | 0.00000 | 0.00000 | 0.00000 | 0.00000 | 0.00000 | 0.01297 | 0.00507 | 0.01050 | 0.00920 | 0.01271 | 0.01043 |
| E9PYK3 | PARP4_MOUSE | 0.00000 | 0.00000 | 0.00000 | 0.00000 | 0.00000 | 0.00000 | 0.00072 | 0.00189 | 0.00053 | 0.00198 | 0.00102 | 0.00189 |
| E9Q1P8 | I2BP2_MOUSE | 0.00000 | 0.00000 | 0.00000 | 0.00000 | 0.00000 | 0.00000 | 0.00100 | 0.00184 | 0.00578 | 0.00363 | 0.00187 | 0.00398 |
| E9Q394 | AKP13_MOUSE | 0.00000 | 0.00000 | 0.00000 | 0.00000 | 0.00000 | 0.00000 | 0.00736 | 0.00447 | 0.00843 | 0.00838 | 0.00356 | 0.00836 |
| E9Q3S4 | M3K19_MOUSE | 0.00000 | 0.00000 | 0.00000 | 0.00000 | 0.00000 | 0.00000 | 0.00000 | 0.00000 | 0.00000 | 0.00107 | 0.00000 | 0.00000 |
| E9Q401 | RYR2_MOUSE  | 0.23512 | 0.26786 | 0.21991 | 0.22102 | 0.23265 | 0.22091 | 0.00000 | 0.00000 | 0.00000 | 0.00021 | 0.00000 | 0.00000 |
| E9Q557 | DESP_MOUSE  | 0.13817 | 0.14500 | 0.23015 | 0.15905 | 0.22304 | 0.12961 | 0.03870 | 0.00858 | 0.01416 | 0.01420 | 0.02064 | 0.01636 |
| E9Q5C9 | NOLC1_MOUSE | 0.00000 | 0.00000 | 0.00000 | 0.00000 | 0.00000 | 0.00000 | 0.00000 | 0.00146 | 0.00241 | 0.00083 | 0.00077 | 0.00093 |
| E9Q634 | MYO1E_MOUSE | 0.00000 | 0.00000 | 0.00000 | 0.00000 | 0.00000 | 0.00000 | 0.01976 | 0.01390 | 0.01101 | 0.00446 | 0.00000 | 0.00000 |
| E9Q6P5 | TTC7B_MOUSE | 0.00000 | 0.00000 | 0.00000 | 0.00000 | 0.00000 | 0.00000 | 0.00317 | 0.00439 | 0.00439 | 0.00282 | 0.00324 | 0.00442 |
| E9Q735 | UBE4A_MOUSE | 0.00000 | 0.00000 | 0.00000 | 0.00000 | 0.00000 | 0.00000 | 0.00000 | 0.00115 | 0.00000 | 0.00000 | 0.00000 | 0.00000 |
| E9Q7G0 | NUMA1_MOUSE | 0.00000 | 0.00000 | 0.00000 | 0.00000 | 0.00000 | 0.00000 | 0.03600 | 0.02977 | 0.04384 | 0.03729 | 0.03921 | 0.04444 |
| E9QAT4 | SC16A_MOUSE | 0.00000 | 0.00000 | 0.00000 | 0.00000 | 0.00000 | 0.00000 | 0.00126 | 0.00167 | 0.00201 | 0.00195 | 0.00197 | 0.00266 |
| F6ZDS4 | TPR_MOUSE   | 0.00039 | 0.00116 | 0.00121 | 0.00067 | 0.00098 | 0.00129 | 0.00475 | 0.00651 | 0.00761 | 0.00606 | 0.00650 | 0.00776 |
| F7BWT7 | TSN15_MOUSE | 0.00000 | 0.00000 | 0.00000 | 0.00000 | 0.00000 | 0.00000 | 0.00330 | 0.00692 | 0.00572 | 0.00566 | 0.00440 | 0.00484 |
| F8VPU2 | FARP1_MOUSE | 0.00000 | 0.00000 | 0.00000 | 0.00000 | 0.00000 | 0.00000 | 0.01307 | 0.01297 | 0.01822 | 0.01243 | 0.01144 | 0.01093 |



|        |             |         |         |         |         |         |         |         |         |         |         |         |         |
|--------|-------------|---------|---------|---------|---------|---------|---------|---------|---------|---------|---------|---------|---------|
| G3X982 | AOXC_MOUSE  | 0.00000 | 0.00000 | 0.00000 | 0.00000 | 0.00000 | 0.00000 | 0.00943 | 0.03049 | 0.00789 | 0.00760 | 0.01126 | 0.01477 |
| G3X9C2 | FBX50_MOUSE | 0.00000 | 0.00000 | 0.00000 | 0.00000 | 0.00000 | 0.00000 | 0.00093 | 0.00000 | 0.00000 | 0.00000 | 0.00234 | 0.00135 |
| G3X9K3 | BIG1_MOUSE  | 0.00000 | 0.00000 | 0.00000 | 0.00000 | 0.00000 | 0.00000 | 0.00000 | 0.00166 | 0.00000 | 0.00000 | 0.00000 | 0.00000 |
| G5E829 | AT2B1_MOUSE | 0.00000 | 0.00000 | 0.00000 | 0.00000 | 0.00000 | 0.00000 | 0.03086 | 0.03305 | 0.04460 | 0.03630 | 0.04142 | 0.03777 |
| G5E897 | PLGT3_MOUSE | 0.00000 | 0.00000 | 0.00000 | 0.00000 | 0.00000 | 0.00000 | 0.00502 | 0.00866 | 0.01041 | 0.00530 | 0.00814 | 0.01120 |
| G5E8K5 | ANK3_MOUSE  | 0.00032 | 0.00037 | 0.00103 | 0.00056 | 0.00099 | 0.00068 | 0.00483 | 0.00417 | 0.00606 | 0.00535 | 0.00562 | 0.00210 |
| G5E8Q8 | AGRF5_MOUSE | 0.00000 | 0.00000 | 0.00000 | 0.00000 | 0.00000 | 0.00000 | 0.00000 | 0.00366 | 0.00423 | 0.00253 | 0.00216 | 0.00360 |
| O08528 | HXK2_MOUSE  | 0.07370 | 0.04871 | 0.04136 | 0.05364 | 0.04806 | 0.04085 | 0.02347 | 0.00581 | 0.00557 | 0.00672 | 0.00838 | 0.00918 |
| O08529 | CAN2_MOUSE  | 0.00575 | 0.00767 | 0.00532 | 0.00707 | 0.00835 | 0.00598 | 0.03279 | 0.04555 | 0.04955 | 0.04542 | 0.04438 | 0.04610 |
| O08530 | S1PR1_MOUSE | 0.00000 | 0.00000 | 0.00000 | 0.00000 | 0.00000 | 0.00000 | 0.01198 | 0.00906 | 0.00308 | 0.00397 | 0.00128 | 0.00382 |
| O08532 | CA2D1_MOUSE | 0.01905 | 0.02513 | 0.01957 | 0.01347 | 0.01801 | 0.02337 | 0.00862 | 0.01097 | 0.00641 | 0.01213 | 0.00317 | 0.00821 |
| O08539 | BIN1_MOUSE  | 0.00000 | 0.00000 | 0.00000 | 0.00000 | 0.00000 | 0.00000 | 0.03009 | 0.01028 | 0.01572 | 0.00862 | 0.01430 | 0.01357 |
| O08547 | SC22B_MOUSE | 0.00000 | 0.00000 | 0.00000 | 0.00000 | 0.00000 | 0.00000 | 0.02236 | 0.01613 | 0.02184 | 0.02103 | 0.02329 | 0.01990 |
| O08553 | DPYL2_MOUSE | 0.04573 | 0.04906 | 0.03826 | 0.03237 | 0.05196 | 0.05024 | 0.37317 | 0.42833 | 0.38840 | 0.42375 | 0.40060 | 0.46678 |
| O08573 | LEG9_MOUSE  | 0.00000 | 0.00000 | 0.00000 | 0.00000 | 0.00000 | 0.00000 | 0.01324 | 0.00765 | 0.00978 | 0.01138 | 0.00617 | 0.01625 |
| O08579 | EMD_MOUSE   | 0.00000 | 0.00000 | 0.00000 | 0.00000 | 0.00000 | 0.00000 | 0.01001 | 0.00943 | 0.00975 | 0.00969 | 0.00903 | 0.01000 |
| O08582 | GTPB1_MOUSE | 0.00000 | 0.00000 | 0.00000 | 0.00000 | 0.00000 | 0.00000 | 0.00383 | 0.00328 | 0.00446 | 0.00424 | 0.00413 | 0.00611 |
| O08583 | THOC4_MOUSE | 0.00000 | 0.00000 | 0.00000 | 0.00000 | 0.00000 | 0.00000 | 0.02296 | 0.02147 | 0.01762 | 0.01861 | 0.01921 | 0.02194 |
| O08585 | CLCA_MOUSE  | 0.00000 | 0.00000 | 0.00000 | 0.00000 | 0.00000 | 0.00000 | 0.00000 | 0.01247 | 0.01808 | 0.01871 | 0.00878 | 0.00716 |
| O08599 | STXB1_MOUSE | 0.00000 | 0.00000 | 0.00000 | 0.00000 | 0.00000 | 0.00000 | 0.01132 | 0.01520 | 0.01052 | 0.00891 | 0.01063 | 0.01343 |
| O08600 | NUCG_MOUSE  | 0.00485 | 0.00293 | 0.00347 | 0.00315 | 0.00258 | 0.00324 | 0.00000 | 0.00092 | 0.00000 | 0.00089 | 0.00000 | 0.00225 |
| O08638 | MYH11_MOUSE | 0.10092 | 0.11043 | 0.07022 | 0.07083 | 0.07979 | 0.10797 | 0.15945 | 0.12973 | 0.10320 | 0.11913 | 0.12469 | 0.11664 |
| O08663 | MAP2_MOUSE  | 0.00465 | 0.00609 | 0.00296 | 0.00129 | 0.00396 | 0.00514 | 0.07911 | 0.03639 | 0.06187 | 0.06650 | 0.09240 | 0.08536 |
| O08677 | KNG1_MOUSE  | 0.00011 | 0.00000 | 0.00068 | 0.00297 | 0.00000 | 0.00000 | 0.03469 | 0.02362 | 0.02858 | 0.04418 | 0.04126 | 0.01855 |
| O08692 | NGP_MOUSE   | 0.00000 | 0.00000 | 0.00000 | 0.00000 | 0.00000 | 0.00000 | 0.06845 | 0.06355 | 0.03615 | 0.05291 | 0.07734 | 0.10226 |
| O08709 | PRDX6_MOUSE | 0.01551 | 0.01542 | 0.03326 | 0.02340 | 0.02985 | 0.01043 | 1.22585 | 1.14145 | 1.02518 | 0.99616 | 1.16888 | 1.12801 |
| O08738 | CASP6_MOUSE | 0.00000 | 0.00000 | 0.00000 | 0.00000 | 0.00000 | 0.00000 | 0.00644 | 0.00610 | 0.00854 | 0.00626 | 0.00554 | 0.00636 |
| O08739 | AMPD3_MOUSE | 0.00000 | 0.00000 | 0.00000 | 0.00000 | 0.00000 | 0.00000 | 0.00000 | 0.00245 | 0.00191 | 0.00094 | 0.00219 | 0.00207 |
| O08749 | DLDH_MOUSE  | 0.77387 | 0.55528 | 0.71460 | 0.47179 | 0.70298 | 0.43546 | 0.04053 | 0.03729 | 0.04053 | 0.03132 | 0.04180 | 0.03876 |
| O08756 | HCD2_MOUSE  | 0.10052 | 0.06572 | 0.10198 | 0.06212 | 0.08187 | 0.06449 | 0.00879 | 0.02408 | 0.03821 | 0.02461 | 0.02093 | 0.02278 |
| O08759 | UBE3A_MOUSE | 0.00334 | 0.00325 | 0.00217 | 0.00174 | 0.00225 | 0.00274 | 0.00466 | 0.00351 | 0.00320 | 0.00403 | 0.00183 | 0.00563 |
| O08784 | TCOF_MOUSE  | 0.00000 | 0.00000 | 0.00000 | 0.00000 | 0.00000 | 0.00000 | 0.00258 | 0.00190 | 0.00448 | 0.00270 | 0.00481 | 0.00239 |
| O08788 | DCTN1_MOUSE | 0.00880 | 0.01902 | 0.01350 | 0.01072 | 0.00927 | 0.01401 | 0.01718 | 0.03388 | 0.04459 | 0.04118 | 0.03264 | 0.03745 |
| O08795 | GLU2B_MOUSE | 0.00000 | 0.00000 | 0.00000 | 0.00000 | 0.00000 | 0.00000 | 0.01763 | 0.02734 | 0.03484 | 0.02985 | 0.03253 | 0.02985 |

|        |             |         |         |         |         |         |         |         |         |         |         |         |         |
|--------|-------------|---------|---------|---------|---------|---------|---------|---------|---------|---------|---------|---------|---------|
| O08800 | SPB8_MOUSE  | 0.00000 | 0.00000 | 0.00000 | 0.00000 | 0.00000 | 0.00000 | 0.00000 | 0.00320 | 0.00621 | 0.00000 | 0.00459 | 0.00515 |
| O08807 | PRDX4_MOUSE | 0.00000 | 0.00000 | 0.00000 | 0.00000 | 0.00000 | 0.00000 | 0.05053 | 0.04342 | 0.07067 | 0.05914 | 0.05811 | 0.05066 |
| O08808 | DIAP1_MOUSE | 0.00000 | 0.00000 | 0.00000 | 0.00000 | 0.00000 | 0.00000 | 0.00691 | 0.00658 | 0.00891 | 0.00756 | 0.00542 | 0.00616 |
| O08810 | U5S1_MOUSE  | 0.00000 | 0.00000 | 0.00000 | 0.00000 | 0.00000 | 0.00000 | 0.01376 | 0.01507 | 0.01804 | 0.01532 | 0.01439 | 0.01929 |
| O08900 | IKZF3_MOUSE | 0.00000 | 0.00000 | 0.00000 | 0.00000 | 0.00000 | 0.00000 | 0.00000 | 0.00000 | 0.00085 | 0.00000 | 0.00000 | 0.00153 |
| O08911 | MK12_MOUSE  | 0.00000 | 0.00000 | 0.00000 | 0.00000 | 0.00000 | 0.00000 | 0.00175 | 0.00124 | 0.00409 | 0.00222 | 0.00420 | 0.00296 |
| O08914 | FAAH1_MOUSE | 0.00000 | 0.00000 | 0.00000 | 0.00000 | 0.00000 | 0.00000 | 0.00095 | 0.00640 | 0.00630 | 0.00340 | 0.00454 | 0.00329 |
| O08915 | AIP_MOUSE   | 0.00000 | 0.00000 | 0.00000 | 0.00000 | 0.00000 | 0.00000 | 0.00464 | 0.00419 | 0.00771 | 0.00447 | 0.00689 | 0.00472 |
| O08917 | FLOT1_MOUSE | 0.00190 | 0.00593 | 0.01720 | 0.00609 | 0.02566 | 0.00810 | 0.01992 | 0.01971 | 0.02667 | 0.02201 | 0.02564 | 0.02476 |
| O08966 | S22A1_MOUSE | 0.00000 | 0.00000 | 0.00000 | 0.00000 | 0.00000 | 0.00000 | 0.00129 | 0.01745 | 0.00413 | 0.01282 | 0.00333 | 0.00799 |
| O08967 | CYH3_MOUSE  | 0.00000 | 0.00000 | 0.00000 | 0.00000 | 0.00000 | 0.00000 | 0.00492 | 0.00638 | 0.00577 | 0.00599 | 0.00525 | 0.00615 |
| O08992 | SDCB1_MOUSE | 0.00000 | 0.00000 | 0.00000 | 0.00000 | 0.00000 | 0.00000 | 0.00532 | 0.00812 | 0.00841 | 0.00621 | 0.01102 | 0.00977 |
| O08997 | ATOX1_MOUSE | 0.00000 | 0.00000 | 0.00000 | 0.00000 | 0.00000 | 0.00000 | 0.01035 | 0.00427 | 0.00471 | 0.00413 | 0.00404 | 0.00402 |
| O09005 | DEGS1_MOUSE | 0.00000 | 0.00000 | 0.00000 | 0.00000 | 0.00000 | 0.00000 | 0.00474 | 0.00402 | 0.00306 | 0.00000 | 0.00467 | 0.00581 |
| O09043 | NAPSA_MOUSE | 0.00000 | 0.00000 | 0.00000 | 0.00000 | 0.00000 | 0.00000 | 0.00000 | 0.01786 | 0.00392 | 0.00427 | 0.00080 | 0.00211 |
| O09044 | SNP23_MOUSE | 0.00111 | 0.00089 | 0.00047 | 0.00049 | 0.00041 | 0.00029 | 0.01434 | 0.02049 | 0.02288 | 0.01961 | 0.02333 | 0.02457 |
| O09061 | PSB1_MOUSE  | 0.00609 | 0.00735 | 0.00683 | 0.00587 | 0.00752 | 0.00253 | 0.01799 | 0.01438 | 0.02886 | 0.02135 | 0.01534 | 0.02236 |
| O09106 | HDAC1_MOUSE | 0.00000 | 0.00000 | 0.00000 | 0.00000 | 0.00000 | 0.00000 | 0.00991 | 0.01327 | 0.01100 | 0.01156 | 0.00638 | 0.01336 |
| O09110 | MP2K3_MOUSE | 0.00000 | 0.00000 | 0.00000 | 0.00000 | 0.00000 | 0.00000 | 0.00000 | 0.00000 | 0.00079 | 0.00000 | 0.00000 | 0.00000 |
| O09111 | NDUBB_MOUSE | 0.00000 | 0.00000 | 0.00000 | 0.00000 | 0.00000 | 0.00000 | 0.00280 | 0.00569 | 0.00128 | 0.00471 | 0.00078 | 0.00186 |
| O09117 | SYPL1_MOUSE | 0.00000 | 0.00000 | 0.00000 | 0.00000 | 0.00000 | 0.00000 | 0.00000 | 0.02038 | 0.03396 | 0.02178 | 0.01684 | 0.01193 |
| O09131 | GSTO1_MOUSE | 0.00746 | 0.00244 | 0.00789 | 0.00817 | 0.00670 | 0.00527 | 0.04306 | 0.06058 | 0.08070 | 0.06126 | 0.04261 | 0.06757 |
| O09159 | MA2B1_MOUSE | 0.00000 | 0.00000 | 0.00000 | 0.00000 | 0.00000 | 0.00000 | 0.01193 | 0.00465 | 0.00549 | 0.00486 | 0.00681 | 0.00473 |
| O09161 | CASQ2_MOUSE | 0.09549 | 0.08736 | 0.11971 | 0.08586 | 0.14736 | 0.13954 | 0.03929 | 0.01654 | 0.02129 | 0.02452 | 0.02862 | 0.01742 |
| O09164 | SODE_MOUSE  | 0.00000 | 0.00000 | 0.00000 | 0.00000 | 0.00000 | 0.00000 | 0.11280 | 0.08435 | 0.08443 | 0.07034 | 0.08041 | 0.07238 |
| O09165 | CASQ1_MOUSE | 0.00000 | 0.00000 | 0.00000 | 0.00000 | 0.00000 | 0.00000 | 0.06731 | 0.00000 | 0.00008 | 0.00005 | 0.00000 | 0.00003 |
| O09167 | RL21_MOUSE  | 0.00000 | 0.00000 | 0.00000 | 0.00000 | 0.00000 | 0.00000 | 0.01676 | 0.01502 | 0.01759 | 0.01381 | 0.01667 | 0.01391 |
| O09172 | GSHO_MOUSE  | 0.00443 | 0.00748 | 0.00507 | 0.00304 | 0.00306 | 0.00261 | 0.00952 | 0.00511 | 0.00485 | 0.00623 | 0.00713 | 0.00325 |
| O09173 | HGD_MOUSE   | 0.00000 | 0.00000 | 0.00000 | 0.00000 | 0.00000 | 0.00000 | 0.00000 | 0.00000 | 0.00000 | 0.00000 | 0.00162 | 0.00000 |
| O09174 | AMACR_MOUSE | 0.01291 | 0.01822 | 0.01312 | 0.01443 | 0.00946 | 0.01005 | 0.00000 | 0.00018 | 0.00006 | 0.00004 | 0.00007 | 0.00011 |
| O35074 | PTGIS_MOUSE | 0.00000 | 0.00000 | 0.00000 | 0.00000 | 0.00000 | 0.00000 | 0.05379 | 0.04311 | 0.04112 | 0.04430 | 0.05626 | 0.04836 |
| O35075 | VP26C_MOUSE | 0.00000 | 0.00000 | 0.00000 | 0.00000 | 0.00000 | 0.00000 | 0.00000 | 0.00000 | 0.02325 | 0.00000 | 0.00000 | 0.03618 |
| O35083 | PLCA_MOUSE  | 0.00000 | 0.00000 | 0.00000 | 0.00000 | 0.00000 | 0.00000 | 0.00000 | 0.00391 | 0.00000 | 0.00084 | 0.00297 | 0.00189 |
| O35098 | DPYL4_MOUSE | 0.00000 | 0.00000 | 0.00000 | 0.00000 | 0.00000 | 0.00000 | 0.00607 | 0.00800 | 0.00926 | 0.00733 | 0.00640 | 0.00000 |

|        |             |         |         |         |         |         |         |         |         |         |         |         |         |
|--------|-------------|---------|---------|---------|---------|---------|---------|---------|---------|---------|---------|---------|---------|
| O35114 | SCR2_MOUSE  | 0.00000 | 0.00000 | 0.00000 | 0.00000 | 0.00000 | 0.00000 | 0.00686 | 0.01404 | 0.01990 | 0.00946 | 0.00597 | 0.00473 |
| O35129 | PHB2_MOUSE  | 0.00395 | 0.00178 | 0.00333 | 0.00374 | 0.00121 | 0.00575 | 0.04986 | 0.04028 | 0.03487 | 0.03669 | 0.04975 | 0.04528 |
| O35206 | COFA1_MOUSE | 0.01260 | 0.01063 | 0.01266 | 0.01123 | 0.01385 | 0.01568 | 0.00566 | 0.00024 | 0.00127 | 0.00000 | 0.00171 | 0.00051 |
| O35215 | DOPD_MOUSE  | 0.00232 | 0.00065 | 0.00186 | 0.00363 | 0.00268 | 0.00111 | 0.05390 | 0.03215 | 0.03357 | 0.02949 | 0.03076 | 0.03385 |
| O35226 | PSMD4_MOUSE | 0.00957 | 0.01392 | 0.00677 | 0.00728 | 0.00839 | 0.00792 | 0.01186 | 0.00951 | 0.01336 | 0.01179 | 0.01655 | 0.01234 |
| O35250 | EXOC7_MOUSE | 0.00000 | 0.00000 | 0.00000 | 0.00000 | 0.00000 | 0.00000 | 0.00000 | 0.00304 | 0.00633 | 0.00533 | 0.00342 | 0.00416 |
| O35286 | DHX15_MOUSE | 0.00000 | 0.00000 | 0.00000 | 0.00000 | 0.00000 | 0.00000 | 0.00546 | 0.00577 | 0.00594 | 0.00678 | 0.00883 | 0.00595 |
| O35295 | PURB_MOUSE  | 0.00000 | 0.00000 | 0.00000 | 0.00000 | 0.00000 | 0.00000 | 0.00590 | 0.00794 | 0.02051 | 0.01174 | 0.01591 | 0.01709 |
| O35309 | NMI_MOUSE   | 0.00000 | 0.00000 | 0.00000 | 0.00000 | 0.00000 | 0.00000 | 0.00181 | 0.00733 | 0.00839 | 0.00740 | 0.00231 | 0.00920 |
| O35326 | SRSF5_MOUSE | 0.00000 | 0.00000 | 0.00000 | 0.00000 | 0.00000 | 0.00000 | 0.00569 | 0.01090 | 0.00795 | 0.00823 | 0.00683 | 0.01037 |
| O35343 | IMA3_MOUSE  | 0.00206 | 0.00064 | 0.00257 | 0.00106 | 0.00198 | 0.00058 | 0.00000 | 0.00000 | 0.00726 | 0.00428 | 0.00317 | 0.00241 |
| O35344 | IMA4_MOUSE  | 0.00044 | 0.00009 | 0.00118 | 0.00110 | 0.00114 | 0.00052 | 0.00742 | 0.00551 | 0.00537 | 0.00556 | 0.00450 | 0.00607 |
| O35345 | IMA7_MOUSE  | 0.00510 | 0.00630 | 0.00601 | 0.00164 | 0.00169 | 0.00519 | 0.00204 | 0.00599 | 0.00310 | 0.00422 | 0.00353 | 0.00501 |
| O35350 | CAN1_MOUSE  | 0.00390 | 0.00275 | 0.00190 | 0.00205 | 0.00256 | 0.00322 | 0.02847 | 0.02411 | 0.02771 | 0.02712 | 0.03143 | 0.02723 |
| O35379 | MRP1_MOUSE  | 0.00000 | 0.00000 | 0.00000 | 0.00000 | 0.00000 | 0.00000 | 0.00313 | 0.00233 | 0.00219 | 0.00227 | 0.00210 | 0.00197 |
| O35381 | AN32A_MOUSE | 0.02036 | 0.02002 | 0.01946 | 0.01511 | 0.01652 | 0.01952 | 0.02870 | 0.03142 | 0.04752 | 0.03665 | 0.02898 | 0.03694 |
| O35382 | EXOC4_MOUSE | 0.00000 | 0.00000 | 0.00000 | 0.00000 | 0.00000 | 0.00000 | 0.00160 | 0.00445 | 0.00564 | 0.00425 | 0.00600 | 0.00385 |
| O35386 | PAHX_MOUSE  | 0.00000 | 0.00000 | 0.00000 | 0.00000 | 0.00000 | 0.00000 | 0.00000 | 0.00000 | 0.00000 | 0.00000 | 0.00000 | 0.00000 |
| O35387 | HAX1_MOUSE  | 0.00000 | 0.00000 | 0.00000 | 0.00000 | 0.00000 | 0.00000 | 0.00000 | 0.00000 | 0.00000 | 0.00000 | 0.00000 | 0.00000 |
| O35409 | FOLH1_MOUSE | 0.00000 | 0.00000 | 0.00000 | 0.00000 | 0.00000 | 0.00000 | 0.02353 | 0.02650 | 0.02296 | 0.01670 | 0.02433 | 0.02395 |
| O35435 | PYRD_MOUSE  | 0.00122 | 0.00509 | 0.00144 | 0.00189 | 0.00592 | 0.00167 | 0.00000 | 0.00132 | 0.00674 | 0.00330 | 0.00088 | 0.00148 |
| O35457 | CCRL2_MOUSE | 0.00000 | 0.00000 | 0.00000 | 0.00000 | 0.00000 | 0.00000 | 0.00000 | 0.00000 | 0.00000 | 0.00000 | 0.00000 | 0.00000 |
| O35459 | ECH1_MOUSE  | 0.06631 | 0.06353 | 0.06182 | 0.05916 | 0.06337 | 0.09725 | 0.00801 | 0.01021 | 0.01092 | 0.01082 | 0.01192 | 0.01261 |
| O35465 | FKBP8_MOUSE | 0.00127 | 0.00144 | 0.00089 | 0.00858 | 0.00097 | 0.00109 | 0.00075 | 0.00186 | 0.00057 | 0.00225 | 0.00000 | 0.00283 |
| O35488 | S27A2_MOUSE | 0.00000 | 0.00000 | 0.00000 | 0.00000 | 0.00000 | 0.00000 | 0.00005 | 0.00002 | 0.00006 | 0.00009 | 0.00002 | 0.00007 |
| O35566 | CD151_MOUSE | 0.00000 | 0.00000 | 0.00000 | 0.00000 | 0.00000 | 0.00000 | 0.00554 | 0.01834 | 0.02392 | 0.01846 | 0.01360 | 0.01587 |
| O35593 | PSDE_MOUSE  | 0.00000 | 0.00000 | 0.00000 | 0.00000 | 0.00000 | 0.00000 | 0.00950 | 0.01718 | 0.01305 | 0.01158 | 0.01836 | 0.00696 |
| O35598 | ADA10_MOUSE | 0.00000 | 0.00000 | 0.00000 | 0.00000 | 0.00000 | 0.00000 | 0.00731 | 0.01119 | 0.00851 | 0.00959 | 0.00603 | 0.00870 |
| O35604 | NPC1_MOUSE  | 0.00000 | 0.00000 | 0.00000 | 0.00000 | 0.00000 | 0.00000 | 0.00000 | 0.00182 | 0.00128 | 0.00300 | 0.00000 | 0.00176 |
| O35609 | SCAM3_MOUSE | 0.00000 | 0.00000 | 0.00000 | 0.00000 | 0.00000 | 0.00000 | 0.01282 | 0.01492 | 0.02090 | 0.01677 | 0.01392 | 0.01576 |
| O35623 | BET1_MOUSE  | 0.00000 | 0.00000 | 0.00000 | 0.00000 | 0.00000 | 0.00000 | 0.00788 | 0.00194 | 0.00621 | 0.00388 | 0.00479 | 0.00618 |
| O35632 | HYAL2_MOUSE | 0.00000 | 0.00000 | 0.00000 | 0.00000 | 0.00000 | 0.00000 | 0.00147 | 0.00517 | 0.00244 | 0.00305 | 0.00120 | 0.00325 |
| O35638 | STAG2_MOUSE | 0.00000 | 0.00000 | 0.00000 | 0.00000 | 0.00000 | 0.00000 | 0.00084 | 0.00169 | 0.00673 | 0.00341 | 0.00000 | 0.00694 |
| O35639 | ANXA3_MOUSE | 0.00163 | 0.00652 | 0.00298 | 0.00273 | 0.00730 | 0.00407 | 0.10451 | 0.12614 | 0.13383 | 0.12980 | 0.13367 | 0.11457 |

|        |             |         |         |         |         |         |         |         |         |         |         |         |         |
|--------|-------------|---------|---------|---------|---------|---------|---------|---------|---------|---------|---------|---------|---------|
| O35640 | ANXA8_MOUSE | 0.00000 | 0.00000 | 0.00000 | 0.00000 | 0.00000 | 0.00000 | 0.00345 | 0.00185 | 0.00241 | 0.00317 | 0.00217 | 0.00488 |
| O35643 | AP1B1_MOUSE | 0.00000 | 0.00000 | 0.00000 | 0.00017 | 0.00000 | 0.00000 | 0.00951 | 0.01073 | 0.01500 | 0.01178 | 0.01364 | 0.01272 |
| O35648 | CETN3_MOUSE | 0.00000 | 0.00000 | 0.00000 | 0.00000 | 0.00000 | 0.00000 | 0.00539 | 0.00444 | 0.00479 | 0.00472 | 0.00666 | 0.00498 |
| O35658 | C1QBP_MOUSE | 0.16297 | 0.12705 | 0.11578 | 0.11082 | 0.14698 | 0.10801 | 0.04582 | 0.05578 | 0.03047 | 0.04158 | 0.05122 | 0.04194 |
| O35678 | MGLL_MOUSE  | 0.00384 | 0.00561 | 0.00115 | 0.00369 | 0.00336 | 0.00240 | 0.00545 | 0.00105 | 0.00724 | 0.00408 | 0.00261 | 0.00232 |
| O35682 | MYADM_MOUSE | 0.00000 | 0.00000 | 0.00000 | 0.00000 | 0.00000 | 0.00000 | 0.00904 | 0.03239 | 0.04020 | 0.03422 | 0.01961 | 0.02132 |
| O35683 | NDUA1_MOUSE | 0.00000 | 0.00000 | 0.00000 | 0.00000 | 0.00000 | 0.00000 | 0.00090 | 0.00284 | 0.00066 | 0.00084 | 0.00057 | 0.00065 |
| O35685 | NUDC_MOUSE  | 0.00000 | 0.00000 | 0.00000 | 0.00000 | 0.00000 | 0.00000 | 0.00485 | 0.01559 | 0.02004 | 0.01585 | 0.00713 | 0.01417 |
| O35691 | PININ_MOUSE | 0.00000 | 0.00000 | 0.00000 | 0.00000 | 0.00000 | 0.00000 | 0.00000 | 0.00311 | 0.00526 | 0.00502 | 0.00458 | 0.00511 |
| O35704 | SPTC1_MOUSE | 0.00000 | 0.00000 | 0.00000 | 0.00000 | 0.00000 | 0.00000 | 0.00000 | 0.00000 | 0.00000 | 0.00000 | 0.00000 | 0.00000 |
| O35737 | HNRH1_MOUSE | 0.00000 | 0.00000 | 0.00000 | 0.00000 | 0.00000 | 0.00000 | 0.11289 | 0.08273 | 0.11390 | 0.11053 | 0.12787 | 0.13315 |
| O35744 | CHIL3_MOUSE | 0.00000 | 0.00000 | 0.00000 | 0.00000 | 0.00000 | 0.00000 | 0.03860 | 0.05774 | 0.03127 | 0.03666 | 0.04400 | 0.04433 |
| O35841 | API5_MOUSE  | 0.00000 | 0.00000 | 0.00000 | 0.00000 | 0.00000 | 0.00000 | 0.00759 | 0.01446 | 0.01453 | 0.01350 | 0.01264 | 0.01322 |
| O35855 | BCAT2_MOUSE | 0.05432 | 0.06610 | 0.07002 | 0.06374 | 0.05235 | 0.05190 | 0.00704 | 0.01541 | 0.00876 | 0.00526 | 0.00990 | 0.00597 |
| O35857 | TIM44_MOUSE | 0.00875 | 0.01016 | 0.00756 | 0.00469 | 0.00826 | 0.00494 | 0.00631 | 0.00657 | 0.00590 | 0.00609 | 0.00633 | 0.00565 |
| O35864 | CSN5_MOUSE  | 0.00000 | 0.00000 | 0.00000 | 0.00000 | 0.00000 | 0.00000 | 0.00754 | 0.00852 | 0.00797 | 0.00753 | 0.01019 | 0.00711 |
| O35887 | CALU_MOUSE  | 0.00651 | 0.00411 | 0.00591 | 0.00321 | 0.00386 | 0.00481 | 0.03574 | 0.03758 | 0.05232 | 0.04825 | 0.05219 | 0.04625 |
| O35900 | LSM2_MOUSE  | 0.00000 | 0.00000 | 0.00000 | 0.00000 | 0.00000 | 0.00000 | 0.00000 | 0.00000 | 0.01848 | 0.02699 | 0.03479 | 0.00000 |
| O35926 | CD5R2_MOUSE | 0.00000 | 0.00000 | 0.00000 | 0.00000 | 0.00000 | 0.00000 | 0.06847 | 0.04853 | 0.10252 | 0.08332 | 0.14763 | 0.11455 |
| O35945 | AL1A7_MOUSE | 0.00000 | 0.00000 | 0.00000 | 0.00000 | 0.00000 | 0.00000 | 0.04576 | 0.05789 | 0.03293 | 0.02825 | 0.05113 | 0.03635 |
| O35955 | PSB10_MOUSE | 0.00000 | 0.00000 | 0.00000 | 0.00000 | 0.00000 | 0.00000 | 0.00736 | 0.00762 | 0.02942 | 0.02154 | 0.02527 | 0.02167 |
| O35969 | GAMT_MOUSE  | 0.00000 | 0.00000 | 0.00000 | 0.00000 | 0.00000 | 0.00000 | 0.00000 | 0.00000 | 0.00058 | 0.00022 | 0.00000 | 0.00024 |
| O35988 | SDC4_MOUSE  | 0.00000 | 0.00000 | 0.00000 | 0.00000 | 0.00000 | 0.00000 | 0.00000 | 0.00389 | 0.00000 | 0.00106 | 0.00139 | 0.00000 |
| O54724 | CAVN1_MOUSE | 0.13900 | 0.17640 | 0.12648 | 0.11197 | 0.20667 | 0.22773 | 0.39554 | 0.47044 | 0.58507 | 0.50765 | 0.42552 | 0.54545 |
| O54734 | OST48_MOUSE | 0.00292 | 0.00635 | 0.00191 | 0.00191 | 0.00502 | 0.00300 | 0.03443 | 0.03277 | 0.03139 | 0.03046 | 0.03169 | 0.03610 |
| Q61080 | FOXF1_MOUSE | 0.00000 | 0.00000 | 0.00000 | 0.00000 | 0.00000 | 0.00000 | 0.00000 | 0.00464 | 0.00024 | 0.00000 | 0.00157 | 0.00150 |
| O54749 | CP2J5_MOUSE | 0.00000 | 0.00000 | 0.00000 | 0.00000 | 0.00000 | 0.00000 | 0.00061 | 0.00094 | 0.00099 | 0.00072 | 0.00053 | 0.00000 |
| O54774 | AP3D1_MOUSE | 0.00000 | 0.00000 | 0.00000 | 0.00000 | 0.00000 | 0.00000 | 0.00700 | 0.00950 | 0.00420 | 0.00595 | 0.00551 | 0.00973 |
| O54824 | IL16_MOUSE  | 0.00000 | 0.00000 | 0.00000 | 0.00000 | 0.00000 | 0.00000 | 0.00000 | 0.00524 | 0.00386 | 0.00482 | 0.00231 | 0.00504 |
| O54833 | CSK22_MOUSE | 0.00000 | 0.00000 | 0.00000 | 0.00000 | 0.00000 | 0.00000 | 0.00511 | 0.00491 | 0.00412 | 0.00301 | 0.00264 | 0.00404 |
| O54834 | RHG06_MOUSE | 0.00000 | 0.00000 | 0.00000 | 0.00000 | 0.00000 | 0.00000 | 0.00000 | 0.00000 | 0.00106 | 0.00000 | 0.00051 | 0.00016 |
| O54865 | GCYB1_MOUSE | 0.00000 | 0.00000 | 0.00000 | 0.00000 | 0.00000 | 0.00000 | 0.01501 | 0.02441 | 0.02147 | 0.02384 | 0.02149 | 0.02510 |
| O54890 | ITB3_MOUSE  | 0.00000 | 0.00000 | 0.00000 | 0.00000 | 0.00000 | 0.00000 | 0.00099 | 0.00000 | 0.00691 | 0.00620 | 0.00303 | 0.00142 |
| O54901 | OX2G_MOUSE  | 0.00000 | 0.00000 | 0.00000 | 0.00000 | 0.00000 | 0.00000 | 0.00359 | 0.01524 | 0.01049 | 0.01081 | 0.00489 | 0.00739 |

|        |             |         |         |         |         |         |         |         |         |         |         |         |         |
|--------|-------------|---------|---------|---------|---------|---------|---------|---------|---------|---------|---------|---------|---------|
| O54909 | RDH16_MOUSE | 0.00000 | 0.00000 | 0.00000 | 0.00000 | 0.00000 | 0.00000 | 0.00000 | 0.00000 | 0.00000 | 0.00000 | 0.00000 | 0.00000 |
| O54931 | AKAP2_MOUSE | 0.00123 | 0.00136 | 0.00095 | 0.00134 | 0.00095 | 0.00137 | 0.11331 | 0.14680 | 0.18254 | 0.15018 | 0.15529 | 0.14960 |
| O54940 | BNIP2_MOUSE | 0.00000 | 0.00000 | 0.00000 | 0.00000 | 0.00000 | 0.00000 | 0.00336 | 0.00069 | 0.00347 | 0.00169 | 0.00199 | 0.00225 |
| O54941 | SMCE1_MOUSE | 0.00000 | 0.00000 | 0.00000 | 0.00000 | 0.00000 | 0.00000 | 0.00093 | 0.00494 | 0.00114 | 0.00202 | 0.00000 | 0.00335 |
| O54942 | CLD5_MOUSE  | 0.00000 | 0.00000 | 0.00000 | 0.00000 | 0.00000 | 0.00000 | 0.00809 | 0.03377 | 0.02348 | 0.01747 | 0.02316 | 0.03312 |
| O54950 | AAKG1_MOUSE | 0.00000 | 0.00000 | 0.00000 | 0.00000 | 0.00000 | 0.00000 | 0.01998 | 0.01891 | 0.02388 | 0.01763 | 0.02668 | 0.01686 |
| O54962 | BAF_MOUSE   | 0.00000 | 0.00000 | 0.00000 | 0.00000 | 0.00000 | 0.00000 | 0.01499 | 0.01966 | 0.00681 | 0.01581 | 0.00448 | 0.02591 |
| O54974 | LEG7_MOUSE  | 0.00000 | 0.00000 | 0.00000 | 0.00000 | 0.00000 | 0.00000 | 0.00279 | 0.00000 | 0.00000 | 0.00000 | 0.00000 | 0.00000 |
| O54984 | GET3_MOUSE  | 0.00000 | 0.00000 | 0.00000 | 0.00000 | 0.00000 | 0.00000 | 0.01381 | 0.01385 | 0.01922 | 0.01706 | 0.02080 | 0.01720 |
| O54988 | SLK_MOUSE   | 0.00165 | 0.00106 | 0.00056 | 0.00090 | 0.00066 | 0.00113 | 0.00727 | 0.01671 | 0.01623 | 0.01898 | 0.00852 | 0.01736 |
| O55013 | TPPC3_MOUSE | 0.00000 | 0.00000 | 0.00000 | 0.00000 | 0.00000 | 0.00000 | 0.00247 | 0.00377 | 0.00863 | 0.00655 | 0.00424 | 0.00716 |
| O55022 | PGRC1_MOUSE | 0.00000 | 0.00000 | 0.00000 | 0.00000 | 0.00000 | 0.00000 | 0.04640 | 0.06441 | 0.08077 | 0.07285 | 0.09062 | 0.08864 |
| O55023 | IMPA1_MOUSE | 0.00000 | 0.00000 | 0.00000 | 0.00000 | 0.00000 | 0.00000 | 0.00960 | 0.02307 | 0.02159 | 0.01752 | 0.01852 | 0.01497 |
| O55026 | ENTP2_MOUSE | 0.00000 | 0.00000 | 0.00000 | 0.00000 | 0.00000 | 0.00000 | 0.00000 | 0.00472 | 0.00438 | 0.00335 | 0.00141 | 0.00154 |
| O55029 | COPB2_MOUSE | 0.00000 | 0.00000 | 0.00000 | 0.00000 | 0.00000 | 0.00000 | 0.04316 | 0.02711 | 0.03781 | 0.03567 | 0.04158 | 0.03221 |
| O55042 | SYUA_MOUSE  | 0.00000 | 0.00000 | 0.00000 | 0.00000 | 0.00000 | 0.00000 | 0.00278 | 0.00099 | 0.00187 | 0.00341 | 0.00393 | 0.00134 |
| O55060 | TPMT_MOUSE  | 0.00000 | 0.00000 | 0.00000 | 0.00000 | 0.00000 | 0.00000 | 0.00078 | 0.00138 | 0.00472 | 0.00326 | 0.00356 | 0.00354 |
| O55071 | CP2BJ_MOUSE | 0.00000 | 0.00000 | 0.00000 | 0.00000 | 0.00000 | 0.00000 | 0.04363 | 0.02015 | 0.04170 | 0.03336 | 0.04914 | 0.03558 |
| O55098 | STK10_MOUSE | 0.00000 | 0.00000 | 0.00000 | 0.00000 | 0.00000 | 0.00000 | 0.00000 | 0.00000 | 0.00072 | 0.00050 | 0.00153 | 0.00022 |
| O55101 | SNG2_MOUSE  | 0.00000 | 0.00000 | 0.00000 | 0.00000 | 0.00000 | 0.00000 | 0.01695 | 0.01142 | 0.00834 | 0.00756 | 0.01165 | 0.01363 |
| O55103 | PRAX_MOUSE  | 0.00000 | 0.00000 | 0.00000 | 0.00000 | 0.00000 | 0.00000 | 0.11240 | 0.08991 | 0.10913 | 0.09316 | 0.14096 | 0.12137 |
| O55106 | STRN_MOUSE  | 0.00125 | 0.00166 | 0.00111 | 0.00105 | 0.00191 | 0.00218 | 0.00610 | 0.00876 | 0.00873 | 0.00581 | 0.01105 | 0.01164 |
| O55125 | NIPS1_MOUSE | 0.00000 | 0.00000 | 0.00000 | 0.00000 | 0.00000 | 0.00000 | 0.00275 | 0.00668 | 0.00026 | 0.00289 | 0.00000 | 0.00155 |
| O55126 | NIPS2_MOUSE | 0.14554 | 0.08151 | 0.14317 | 0.13923 | 0.11131 | 0.16624 | 0.03907 | 0.03334 | 0.03961 | 0.03453 | 0.03785 | 0.03468 |
| O55128 | SAP18_MOUSE | 0.00000 | 0.00000 | 0.00000 | 0.00000 | 0.00000 | 0.00000 | 0.00123 | 0.00089 | 0.00240 | 0.00248 | 0.00393 | 0.00351 |
| O55131 | SEPT7_MOUSE | 0.00540 | 0.00598 | 0.00451 | 0.00468 | 0.00406 | 0.00246 | 0.05108 | 0.04788 | 0.07034 | 0.05322 | 0.07844 | 0.05986 |
| O55135 | IF6_MOUSE   | 0.00000 | 0.00000 | 0.00000 | 0.00000 | 0.00000 | 0.00000 | 0.00580 | 0.00358 | 0.00879 | 0.00613 | 0.00904 | 0.00472 |
| O55137 | ACOT1_MOUSE | 0.00000 | 0.00000 | 0.00000 | 0.00000 | 0.00000 | 0.00000 | 0.00792 | 0.00494 | 0.00892 | 0.00718 | 0.01156 | 0.00854 |
| O55142 | RL35A_MOUSE | 0.00000 | 0.00000 | 0.00000 | 0.00000 | 0.00000 | 0.00000 | 0.00000 | 0.00651 | 0.00144 | 0.00388 | 0.00080 | 0.00234 |
| O55143 | AT2A2_MOUSE | 1.44816 | 1.65616 | 1.50177 | 1.49384 | 1.59797 | 1.89910 | 0.09990 | 0.08486 | 0.08843 | 0.11060 | 0.10149 | 0.08683 |
| O55192 | SC6A2_MOUSE | 0.00000 | 0.00000 | 0.00000 | 0.00000 | 0.00000 | 0.00000 | 0.00000 | 0.00000 | 0.00278 | 0.00176 | 0.00135 | 0.00127 |
| O55201 | SPT5H_MOUSE | 0.00000 | 0.00000 | 0.00000 | 0.00000 | 0.00000 | 0.00000 | 0.00426 | 0.00644 | 0.00660 | 0.00479 | 0.00866 | 0.00789 |
| O55222 | ILK_MOUSE   | 0.00635 | 0.00300 | 0.00604 | 0.00350 | 0.00440 | 0.00368 | 0.07372 | 0.12673 | 0.11869 | 0.11803 | 0.07829 | 0.14137 |
| O55226 | CHAD_MOUSE  | 0.00000 | 0.00000 | 0.00000 | 0.00000 | 0.00000 | 0.00000 | 0.02448 | 0.00154 | 0.00333 | 0.00000 | 0.00513 | 0.00000 |



|        |             |         |         |         |         |         |         |         |         |         |         |         |         |
|--------|-------------|---------|---------|---------|---------|---------|---------|---------|---------|---------|---------|---------|---------|
| O55229 | CHKB_MOUSE  | 0.00000 | 0.00000 | 0.00000 | 0.00000 | 0.00000 | 0.00000 | 0.00000 | 0.00205 | 0.00358 | 0.00213 | 0.00176 | 0.00354 |
| O55234 | PSB5_MOUSE  | 0.00326 | 0.00309 | 0.00678 | 0.00594 | 0.00408 | 0.00289 | 0.00529 | 0.00642 | 0.01037 | 0.00939 | 0.00708 | 0.00583 |
| O55242 | SGMR1_MOUSE | 0.00000 | 0.00000 | 0.00000 | 0.00000 | 0.00000 | 0.00000 | 0.00000 | 0.00000 | 0.00000 | 0.00000 | 0.00000 | 0.00000 |
| O70133 | DHX9_MOUSE  | 0.00000 | 0.00000 | 0.00000 | 0.00000 | 0.00000 | 0.00000 | 0.02764 | 0.03321 | 0.04498 | 0.04175 | 0.04757 | 0.03875 |
| O70138 | MMP8_MOUSE  | 0.00000 | 0.00000 | 0.00000 | 0.00000 | 0.00000 | 0.00000 | 0.00000 | 0.00000 | 0.00000 | 0.00000 | 0.00028 | 0.00191 |
| O70152 | DPM1_MOUSE  | 0.00000 | 0.00000 | 0.00000 | 0.00000 | 0.00000 | 0.00000 | 0.00305 | 0.00442 | 0.00495 | 0.00580 | 0.00581 | 0.00169 |
| O70172 | PI42A_MOUSE | 0.00000 | 0.00000 | 0.00000 | 0.00000 | 0.00000 | 0.00000 | 0.00000 | 0.00000 | 0.00000 | 0.00000 | 0.00297 | 0.00000 |
| O70194 | EIF3D_MOUSE | 0.00000 | 0.00000 | 0.00000 | 0.00000 | 0.00000 | 0.00000 | 0.01004 | 0.01138 | 0.01076 | 0.01157 | 0.01460 | 0.01114 |
| O70209 | PDLI3_MOUSE | 0.00000 | 0.00000 | 0.00000 | 0.00000 | 0.00000 | 0.00000 | 0.01826 | 0.00219 | 0.00393 | 0.00454 | 0.00355 | 0.00586 |
| O70250 | PGAM2_MOUSE | 0.00000 | 0.00000 | 0.00000 | 0.00000 | 0.00000 | 0.00000 | 0.02709 | 0.01132 | 0.01688 | 0.02160 | 0.00425 | 0.01163 |
| O70251 | EF1B_MOUSE  | 0.03693 | 0.01284 | 0.03034 | 0.01865 | 0.02797 | 0.01892 | 0.05159 | 0.03728 | 0.06146 | 0.04111 | 0.06095 | 0.05715 |
| O70252 | HMOX2_MOUSE | 0.00495 | 0.00291 | 0.00232 | 0.00359 | 0.00448 | 0.00447 | 0.00922 | 0.00802 | 0.01270 | 0.00940 | 0.01300 | 0.00959 |
| O70274 | TP4A2_MOUSE | 0.00000 | 0.00000 | 0.00000 | 0.00000 | 0.00000 | 0.00000 | 0.00000 | 0.00141 | 0.00337 | 0.00126 | 0.00141 | 0.00106 |
| O70305 | ATX2_MOUSE  | 0.01129 | 0.00940 | 0.01062 | 0.01029 | 0.00885 | 0.00474 | 0.00235 | 0.00347 | 0.00411 | 0.00087 | 0.00222 | 0.00211 |
| O70309 | ITB5_MOUSE  | 0.00000 | 0.00000 | 0.00000 | 0.00000 | 0.00000 | 0.00000 | 0.00253 | 0.00573 | 0.00185 | 0.00094 | 0.00269 | 0.00476 |
| O70310 | NMT1_MOUSE  | 0.00069 | 0.00221 | 0.00104 | 0.00092 | 0.00126 | 0.00142 | 0.01422 | 0.01484 | 0.01308 | 0.01379 | 0.01682 | 0.01744 |
| O70318 | E41L2_MOUSE | 0.00786 | 0.01790 | 0.00668 | 0.00377 | 0.00755 | 0.00938 | 0.02855 | 0.04032 | 0.05284 | 0.04225 | 0.04893 | 0.03996 |
| O70324 | MOT8_MOUSE  | 0.00000 | 0.00000 | 0.00000 | 0.00000 | 0.00000 | 0.00000 | 0.00000 | 0.00000 | 0.00000 | 0.00000 | 0.00000 | 0.00000 |
| O70325 | GPX4_MOUSE  | 0.00000 | 0.00000 | 0.00000 | 0.00000 | 0.00000 | 0.00000 | 0.01576 | 0.02008 | 0.02397 | 0.02281 | 0.01984 | 0.02206 |
| O70370 | CATS_MOUSE  | 0.00000 | 0.00000 | 0.00000 | 0.00000 | 0.00000 | 0.00000 | 0.01102 | 0.00636 | 0.00440 | 0.00826 | 0.00799 | 0.01226 |
| O70378 | EMC8_MOUSE  | 0.00000 | 0.00000 | 0.00000 | 0.00000 | 0.00000 | 0.00000 | 0.00226 | 0.00134 | 0.00490 | 0.00319 | 0.00623 | 0.00339 |
| O70400 | PDLI1_MOUSE | 0.00449 | 0.00337 | 0.00254 | 0.00402 | 0.00394 | 0.00596 | 0.01357 | 0.01368 | 0.01684 | 0.01462 | 0.01441 | 0.01503 |
| O70404 | VAMP8_MOUSE | 0.00000 | 0.00000 | 0.00000 | 0.00000 | 0.00000 | 0.00000 | 0.00000 | 0.01206 | 0.01871 | 0.01541 | 0.00844 | 0.00854 |
| O70423 | AOC3_MOUSE  | 0.00417 | 0.00444 | 0.00324 | 0.00256 | 0.00374 | 0.00655 | 0.01180 | 0.00809 | 0.02303 | 0.00814 | 0.01101 | 0.00714 |
| O70435 | PSA3_MOUSE  | 0.00000 | 0.00000 | 0.00000 | 0.00000 | 0.00000 | 0.00000 | 0.02213 | 0.02944 | 0.01980 | 0.03104 | 0.01474 | 0.02217 |
| O70439 | STX7_MOUSE  | 0.00217 | 0.00393 | 0.00279 | 0.00270 | 0.00348 | 0.00325 | 0.02469 | 0.03224 | 0.02803 | 0.04151 | 0.02294 | 0.03447 |
| O70456 | 1433S_MOUSE | 0.00000 | 0.00000 | 0.00000 | 0.00000 | 0.00000 | 0.00000 | 0.05464 | 0.01776 | 0.01848 | 0.01507 | 0.01852 | 0.01366 |
| O70468 | MYPC3_MOUSE | 1.14491 | 1.46768 | 1.01573 | 1.28842 | 1.17675 | 1.42079 | 0.01626 | 0.01509 | 0.01771 | 0.02364 | 0.01591 | 0.01365 |
| O70475 | UGDH_MOUSE  | 0.00000 | 0.00000 | 0.00000 | 0.00000 | 0.00000 | 0.00000 | 0.00338 | 0.00847 | 0.00909 | 0.00847 | 0.00660 | 0.00464 |
| O70492 | SNX3_MOUSE  | 0.00000 | 0.00000 | 0.00000 | 0.00000 | 0.00000 | 0.00000 | 0.01709 | 0.01691 | 0.00836 | 0.01212 | 0.00772 | 0.01313 |
| O70493 | SNX12_MOUSE | 0.00000 | 0.00000 | 0.00000 | 0.00000 | 0.00000 | 0.00000 | 0.00804 | 0.01290 | 0.00442 | 0.00669 | 0.00123 | 0.00922 |
| O70503 | DHB12_MOUSE | 0.00373 | 0.00296 | 0.00191 | 0.00165 | 0.00193 | 0.00289 | 0.02274 | 0.00789 | 0.01741 | 0.01017 | 0.00426 | 0.01818 |
| O70551 | SRPK1_MOUSE | 0.00000 | 0.00000 | 0.00000 | 0.00000 | 0.00000 | 0.00000 | 0.00000 | 0.00000 | 0.00105 | 0.00000 | 0.00000 | 0.00000 |
| O70566 | DIAP2_MOUSE | 0.00000 | 0.00000 | 0.00000 | 0.00000 | 0.00000 | 0.00000 | 0.00000 | 0.00000 | 0.00347 | 0.00114 | 0.00000 | 0.00087 |

|        |             |         |         |         |         |         |         |         |         |         |         |         |         |
|--------|-------------|---------|---------|---------|---------|---------|---------|---------|---------|---------|---------|---------|---------|
| O70572 | NSMA_MOUSE  | 0.00000 | 0.00000 | 0.00000 | 0.00000 | 0.00000 | 0.00000 | 0.00116 | 0.00000 | 0.00085 | 0.00055 | 0.00000 | 0.00103 |
| O70577 | S22A2_MOUSE | 0.00000 | 0.00000 | 0.00000 | 0.00000 | 0.00000 | 0.00000 | 0.00365 | 0.00143 | 0.00667 | 0.00134 | 0.00957 | 0.00335 |
| O70589 | CSKP_MOUSE  | 0.00000 | 0.00000 | 0.00000 | 0.00000 | 0.00000 | 0.00000 | 0.00095 | 0.00231 | 0.00167 | 0.00095 | 0.00213 | 0.00133 |
| O70591 | PFD2_MOUSE  | 0.00000 | 0.00000 | 0.00000 | 0.00000 | 0.00000 | 0.00000 | 0.00000 | 0.00000 | 0.00142 | 0.00000 | 0.00163 | 0.00234 |
| O70622 | RTN2_MOUSE  | 0.04400 | 0.02521 | 0.03992 | 0.02684 | 0.02929 | 0.01523 | 0.01080 | 0.00415 | 0.00197 | 0.00476 | 0.00455 | 0.00214 |
| O88207 | CO5A1_MOUSE | 0.00000 | 0.00000 | 0.00000 | 0.00000 | 0.00000 | 0.00000 | 0.01688 | 0.01349 | 0.01307 | 0.01122 | 0.01340 | 0.01403 |
| O88271 | CFDP1_MOUSE | 0.00000 | 0.00000 | 0.00000 | 0.00000 | 0.00000 | 0.00000 | 0.00000 | 0.00172 | 0.00319 | 0.00163 | 0.00372 | 0.00220 |
| O88307 | SORL_MOUSE  | 0.00000 | 0.00000 | 0.00000 | 0.00000 | 0.00000 | 0.00000 | 0.00106 | 0.00309 | 0.00306 | 0.00319 | 0.00265 | 0.00000 |
| O88322 | NID2_MOUSE  | 0.00593 | 0.00923 | 0.00490 | 0.00435 | 0.00514 | 0.00492 | 0.01956 | 0.01854 | 0.02892 | 0.01934 | 0.02512 | 0.02575 |
| O88338 | CAD16_MOUSE | 0.00000 | 0.00000 | 0.00000 | 0.00000 | 0.00000 | 0.00000 | 0.00000 | 0.00000 | 0.00000 | 0.00000 | 0.00000 | 0.00000 |
| O88342 | WDR1_MOUSE  | 0.04328 | 0.02247 | 0.04284 | 0.03179 | 0.04067 | 0.03205 | 0.06474 | 0.05616 | 0.06805 | 0.06141 | 0.07584 | 0.05307 |
| O88343 | S4A4_MOUSE  | 0.00000 | 0.00000 | 0.00000 | 0.00000 | 0.00000 | 0.00000 | 0.00000 | 0.00000 | 0.00029 | 0.00016 | 0.00000 | 0.00000 |
| O88384 | VT11B_MOUSE | 0.00000 | 0.00000 | 0.00000 | 0.00000 | 0.00000 | 0.00000 | 0.00141 | 0.00248 | 0.00606 | 0.00558 | 0.00502 | 0.00364 |
| O88428 | PAPS2_MOUSE | 0.00000 | 0.00000 | 0.00000 | 0.00000 | 0.00000 | 0.00000 | 0.00624 | 0.01214 | 0.00952 | 0.01141 | 0.01395 | 0.01311 |
| O88441 | MTX2_MOUSE  | 0.00392 | 0.00400 | 0.00746 | 0.00326 | 0.00372 | 0.00136 | 0.00140 | 0.00327 | 0.00651 | 0.00410 | 0.00174 | 0.00236 |
| O88447 | KLC1_MOUSE  | 0.00000 | 0.00000 | 0.00000 | 0.00000 | 0.00000 | 0.00000 | 0.01153 | 0.01513 | 0.01621 | 0.01479 | 0.01749 | 0.01164 |
| O88456 | CPNS1_MOUSE | 0.00000 | 0.00000 | 0.00000 | 0.00000 | 0.00000 | 0.00000 | 0.02766 | 0.03228 | 0.03039 | 0.03091 | 0.03625 | 0.02206 |
| O88487 | DC1I2_MOUSE | 0.00356 | 0.00222 | 0.00561 | 0.00534 | 0.00312 | 0.00092 | 0.02317 | 0.02768 | 0.04949 | 0.03872 | 0.05020 | 0.03595 |
| O88492 | PLIN4_MOUSE | 0.01024 | 0.08756 | 0.01048 | 0.03585 | 0.01015 | 0.00978 | 0.00178 | 0.00550 | 0.00777 | 0.00497 | 0.00249 | 0.00191 |
| O88531 | PPT1_MOUSE  | 0.00752 | 0.00508 | 0.01047 | 0.00547 | 0.00613 | 0.00470 | 0.01687 | 0.01366 | 0.01171 | 0.00973 | 0.00629 | 0.00905 |
| O88532 | ZFR_MOUSE   | 0.00000 | 0.00000 | 0.00000 | 0.00000 | 0.00000 | 0.00000 | 0.00000 | 0.00000 | 0.00000 | 0.00000 | 0.00000 | 0.00000 |
| O88533 | DDC_MOUSE   | 0.00000 | 0.00000 | 0.00000 | 0.00000 | 0.00000 | 0.00000 | 0.00000 | 0.00000 | 0.00000 | 0.00000 | 0.00000 | 0.00000 |
| O88543 | CSN3_MOUSE  | 0.00559 | 0.01012 | 0.00601 | 0.00514 | 0.01378 | 0.00442 | 0.00297 | 0.00948 | 0.00775 | 0.00770 | 0.01022 | 0.00642 |
| O88544 | CSN4_MOUSE  | 0.00248 | 0.00318 | 0.00229 | 0.00388 | 0.00292 | 0.00364 | 0.00728 | 0.01229 | 0.01100 | 0.00972 | 0.00775 | 0.01245 |
| O88545 | CSN6_MOUSE  | 0.00278 | 0.00307 | 0.00369 | 0.00291 | 0.00377 | 0.00239 | 0.00687 | 0.00592 | 0.00973 | 0.00710 | 0.00914 | 0.00698 |
| O88552 | CLD2_MOUSE  | 0.00000 | 0.00000 | 0.00000 | 0.00000 | 0.00000 | 0.00000 | 0.00000 | 0.00000 | 0.00000 | 0.00000 | 0.00000 | 0.00000 |
| O88569 | ROA2_MOUSE  | 0.01413 | 0.01177 | 0.00778 | 0.01254 | 0.01564 | 0.01288 | 0.17440 | 0.20151 | 0.21064 | 0.19423 | 0.22259 | 0.21060 |
| O88572 | LRP6_MOUSE  | 0.00000 | 0.00000 | 0.00000 | 0.00000 | 0.00000 | 0.00000 | 0.00649 | 0.00964 | 0.01409 | 0.01385 | 0.01539 | 0.00972 |
| O88576 | S6A18_MOUSE | 0.00000 | 0.00000 | 0.00000 | 0.00000 | 0.00000 | 0.00000 | 0.00000 | 0.00000 | 0.00000 | 0.00091 | 0.00000 | 0.00082 |
| O88587 | COMT_MOUSE  | 0.00000 | 0.00000 | 0.00000 | 0.00000 | 0.00000 | 0.00000 | 0.00471 | 0.00969 | 0.01161 | 0.00907 | 0.01006 | 0.00786 |
| O88630 | GOSR1_MOUSE | 0.00000 | 0.00000 | 0.00000 | 0.00000 | 0.00000 | 0.00000 | 0.00296 | 0.00252 | 0.00492 | 0.00393 | 0.00353 | 0.00326 |
| O88668 | CREG1_MOUSE | 0.00000 | 0.00000 | 0.00000 | 0.00000 | 0.00000 | 0.00000 | 0.00690 | 0.00323 | 0.00658 | 0.00573 | 0.00758 | 0.00413 |
| O88685 | PRS6A_MOUSE | 0.00574 | 0.00569 | 0.00630 | 0.00419 | 0.00475 | 0.00556 | 0.02804 | 0.03096 | 0.02917 | 0.02870 | 0.03665 | 0.03379 |
| O88696 | CLPP_MOUSE  | 0.02316 | 0.01075 | 0.02732 | 0.01307 | 0.01607 | 0.01530 | 0.01546 | 0.00495 | 0.00818 | 0.00908 | 0.00712 | 0.01029 |

|        |             |         |         |         |         |         |         |         |         |         |         |         |         |
|--------|-------------|---------|---------|---------|---------|---------|---------|---------|---------|---------|---------|---------|---------|
| O88712 | CTBP1_MOUSE | 0.00000 | 0.00000 | 0.00000 | 0.00000 | 0.00000 | 0.00000 | 0.00625 | 0.00735 | 0.00981 | 0.00797 | 0.00882 | 0.00903 |
| O88746 | TOM1_MOUSE  | 0.00577 | 0.00510 | 0.00289 | 0.00282 | 0.00321 | 0.00293 | 0.00580 | 0.00598 | 0.00612 | 0.00524 | 0.00590 | 0.00669 |
| O88792 | JAM1_MOUSE  | 0.00000 | 0.00000 | 0.00000 | 0.00000 | 0.00000 | 0.00000 | 0.02303 | 0.01940 | 0.02352 | 0.01596 | 0.01766 | 0.02398 |
| O88811 | STAM2_MOUSE | 0.00000 | 0.00000 | 0.00000 | 0.00000 | 0.00000 | 0.00000 | 0.00472 | 0.00153 | 0.00553 | 0.00472 | 0.00391 | 0.00473 |
| O88844 | IDHC_MOUSE  | 0.01141 | 0.01263 | 0.01563 | 0.01043 | 0.01735 | 0.02056 | 0.03919 | 0.03230 | 0.03478 | 0.03018 | 0.03284 | 0.03428 |
| O88848 | ARL6_MOUSE  | 0.00000 | 0.00000 | 0.00000 | 0.00000 | 0.00000 | 0.00000 | 0.00000 | 0.00000 | 0.00052 | 0.00076 | 0.00000 | 0.00054 |
| O88851 | RBBP9_MOUSE | 0.00000 | 0.00000 | 0.00000 | 0.00000 | 0.00000 | 0.00000 | 0.01123 | 0.00901 | 0.01791 | 0.01729 | 0.02080 | 0.01496 |
| O88909 | S22A8_MOUSE | 0.00000 | 0.00000 | 0.00000 | 0.00000 | 0.00000 | 0.00000 | 0.00000 | 0.00000 | 0.00000 | 0.00000 | 0.00000 | 0.00000 |
| O88952 | LIN7C_MOUSE | 0.00000 | 0.00000 | 0.00000 | 0.00000 | 0.00000 | 0.00000 | 0.00000 | 0.00751 | 0.00771 | 0.00667 | 0.00318 | 0.00808 |
| O88958 | GNPI1_MOUSE | 0.00000 | 0.00000 | 0.00000 | 0.00000 | 0.00000 | 0.00000 | 0.00082 | 0.00267 | 0.00792 | 0.00967 | 0.00532 | 0.00766 |
| O88968 | TCO2_MOUSE  | 0.00000 | 0.00000 | 0.00000 | 0.00000 | 0.00000 | 0.00000 | 0.00000 | 0.00000 | 0.00266 | 0.00134 | 0.00152 | 0.00228 |
| O88983 | STX8_MOUSE  | 0.00000 | 0.00000 | 0.00000 | 0.00000 | 0.00000 | 0.00000 | 0.00412 | 0.00223 | 0.00839 | 0.00501 | 0.00876 | 0.00765 |
| O88986 | KBL_MOUSE   | 0.00000 | 0.00000 | 0.00000 | 0.00000 | 0.00000 | 0.00000 | 0.00000 | 0.00134 | 0.00000 | 0.00000 | 0.00000 | 0.00000 |
| O88990 | ACTN3_MOUSE | 0.00000 | 0.00000 | 0.00000 | 0.00000 | 0.00000 | 0.00000 | 0.02413 | 0.00001 | 0.00012 | 0.00023 | 0.00004 | 0.00010 |
| O89017 | LG MN_MOUSE | 0.00000 | 0.00000 | 0.00000 | 0.00000 | 0.00000 | 0.00000 | 0.00000 | 0.00146 | 0.00000 | 0.00063 | 0.00000 | 0.00053 |
| O89023 | TPP1_MOUSE  | 0.00000 | 0.00000 | 0.00000 | 0.00000 | 0.00000 | 0.00000 | 0.00759 | 0.01135 | 0.01623 | 0.01049 | 0.01056 | 0.00762 |
| O89051 | ITM2B_MOUSE | 0.00000 | 0.00000 | 0.00000 | 0.00000 | 0.00000 | 0.00000 | 0.01654 | 0.01291 | 0.01548 | 0.01401 | 0.01589 | 0.01587 |
| O89053 | COR1A_MOUSE | 0.00000 | 0.00000 | 0.00000 | 0.00000 | 0.00000 | 0.00000 | 0.00820 | 0.02426 | 0.04965 | 0.05185 | 0.03731 | 0.04082 |
| O89079 | COPE_MOUSE  | 0.00699 | 0.00794 | 0.00699 | 0.00632 | 0.00630 | 0.00639 | 0.03847 | 0.02991 | 0.04390 | 0.03961 | 0.04883 | 0.04044 |
| O89086 | RBM3_MOUSE  | 0.00000 | 0.00000 | 0.00000 | 0.00000 | 0.00000 | 0.00000 | 0.00599 | 0.00887 | 0.00740 | 0.00917 | 0.00372 | 0.00885 |
| O89090 | SP1_MOUSE   | 0.00000 | 0.00000 | 0.00000 | 0.00000 | 0.00000 | 0.00000 | 0.00153 | 0.00000 | 0.00583 | 0.00414 | 0.00601 | 0.00129 |
| O89103 | C1QR1_MOUSE | 0.00000 | 0.00000 | 0.00000 | 0.00000 | 0.00000 | 0.00000 | 0.02150 | 0.02915 | 0.02473 | 0.02446 | 0.02137 | 0.02275 |
| O89104 | SYPL2_MOUSE | 0.00000 | 0.00000 | 0.00000 | 0.00000 | 0.00000 | 0.00000 | 0.00000 | 0.00000 | 0.00000 | 0.00000 | 0.00000 | 0.00000 |
| O89106 | FHIT_MOUSE  | 0.00000 | 0.00000 | 0.00000 | 0.00000 | 0.00000 | 0.00000 | 0.00000 | 0.00000 | 0.00000 | 0.00000 | 0.00000 | 0.00000 |
| O89110 | CASP8_MOUSE | 0.00000 | 0.00000 | 0.00000 | 0.00000 | 0.00000 | 0.00000 | 0.01183 | 0.00173 | 0.00348 | 0.00336 | 0.00408 | 0.00528 |
| O89112 | LANC1_MOUSE | 0.00000 | 0.00000 | 0.00000 | 0.00000 | 0.00000 | 0.00000 | 0.00122 | 0.00488 | 0.00563 | 0.00546 | 0.00205 | 0.00448 |
| P00329 | ADH1_MOUSE  | 0.00000 | 0.00000 | 0.00000 | 0.00000 | 0.00000 | 0.00000 | 0.13367 | 0.08024 | 0.16402 | 0.12358 | 0.17508 | 0.13153 |
| P00375 | DYR_MOUSE   | 0.00000 | 0.00000 | 0.00000 | 0.00000 | 0.00000 | 0.00000 | 0.00011 | 0.00010 | 0.00000 | 0.00000 | 0.00000 | 0.00092 |
| P00397 | COX1_MOUSE  | 0.01005 | 0.00577 | 0.01046 | 0.01216 | 0.00735 | 0.01099 | 0.00311 | 0.00877 | 0.01007 | 0.00955 | 0.00389 | 0.00474 |
| P00405 | COX2_MOUSE  | 0.47796 | 0.29714 | 0.34847 | 0.26250 | 0.30274 | 0.36478 | 0.10900 | 0.06875 | 0.07307 | 0.07417 | 0.06895 | 0.06725 |
| P00416 | COX3_MOUSE  | 0.00000 | 0.00000 | 0.00000 | 0.00000 | 0.00000 | 0.00000 | 0.00000 | 0.01490 | 0.03080 | 0.02341 | 0.01058 | 0.00991 |
| P00493 | HPRT_MOUSE  | 0.00000 | 0.00000 | 0.00000 | 0.00000 | 0.00000 | 0.00000 | 0.00482 | 0.00466 | 0.00315 | 0.00520 | 0.00000 | 0.00553 |
| P00848 | ATP6_MOUSE  | 0.00000 | 0.00000 | 0.00000 | 0.00000 | 0.00000 | 0.00000 | 0.00068 | 0.00334 | 0.00642 | 0.00474 | 0.00167 | 0.00210 |
| P00920 | CAH2_MOUSE  | 0.00813 | 0.00622 | 0.02021 | 0.03125 | 0.01835 | 0.00396 | 0.11793 | 0.07967 | 0.08465 | 0.16395 | 0.19844 | 0.05913 |



|        |             |         |         |         |         |         |         |         |         |         |         |         |         |
|--------|-------------|---------|---------|---------|---------|---------|---------|---------|---------|---------|---------|---------|---------|
| P01027 | CO3_MOUSE   | 0.03792 | 0.02121 | 0.01650 | 0.04202 | 0.03691 | 0.01949 | 0.07329 | 0.04394 | 0.06791 | 0.08972 | 0.11542 | 0.06382 |
| P01029 | CO4B_MOUSE  | 0.00238 | 0.00030 | 0.00301 | 0.00219 | 0.00200 | 0.00121 | 0.03848 | 0.02524 | 0.03459 | 0.02464 | 0.04049 | 0.02741 |
| P01592 | IGJ_MOUSE   | 0.00000 | 0.00000 | 0.00000 | 0.00000 | 0.00000 | 0.00000 | 0.01022 | 0.00359 | 0.00685 | 0.01320 | 0.00861 | 0.00000 |
| P01631 | KV2A7_MOUSE | 0.00000 | 0.00000 | 0.00000 | 0.00000 | 0.00000 | 0.00000 | 0.00944 | 0.00559 | 0.01272 | 0.01086 | 0.00717 | 0.00447 |
| P01635 | KV5A3_MOUSE | 0.00000 | 0.00000 | 0.00000 | 0.00000 | 0.00000 | 0.00000 | 0.00000 | 0.00000 | 0.00000 | 0.00000 | 0.00000 | 0.00000 |
| P01638 | KV5A6_MOUSE | 0.00000 | 0.00000 | 0.00000 | 0.00000 | 0.00000 | 0.00000 | 0.00000 | 0.00000 | 0.00000 | 0.00000 | 0.01334 | 0.00000 |
| P01645 | KV5AC_MOUSE | 0.00000 | 0.00000 | 0.00000 | 0.00000 | 0.00000 | 0.00000 | 0.00731 | 0.01419 | 0.01212 | 0.00502 | 0.01362 | 0.02006 |
| P01655 | KV3A2_MOUSE | 0.00000 | 0.00000 | 0.00000 | 0.00000 | 0.00000 | 0.00000 | 0.01540 | 0.00343 | 0.00353 | 0.00155 | 0.00271 | 0.00000 |
| P01786 | HVM17_MOUSE | 0.00000 | 0.00000 | 0.00000 | 0.00000 | 0.00000 | 0.00000 | 0.00000 | 0.00000 | 0.00069 | 0.00024 | 0.00000 | 0.00000 |
| P01800 | HVM31_MOUSE | 0.00000 | 0.00000 | 0.00000 | 0.00000 | 0.00000 | 0.00000 | 0.00000 | 0.00000 | 0.00321 | 0.00298 | 0.00386 | 0.00000 |
| P01831 | THY1_MOUSE  | 0.00000 | 0.00000 | 0.00000 | 0.00000 | 0.00000 | 0.00000 | 0.00488 | 0.00429 | 0.00843 | 0.00553 | 0.00656 | 0.00600 |
| P01837 | IGKC_MOUSE  | 0.00000 | 0.00000 | 0.00000 | 0.00000 | 0.00000 | 0.00000 | 0.03834 | 0.05182 | 0.02811 | 0.02860 | 0.02662 | 0.03359 |
| P01843 | LAC1_MOUSE  | 0.00000 | 0.00000 | 0.00000 | 0.00000 | 0.00000 | 0.00000 | 0.00000 | 0.00000 | 0.01123 | 0.00247 | 0.00246 | 0.00000 |
| P01864 | GCAB_MOUSE  | 0.00287 | 0.00661 | 0.00365 | 0.01139 | 0.00953 | 0.00397 | 0.04358 | 0.01070 | 0.03061 | 0.00925 | 0.01632 | 0.02068 |
| P01867 | IGG2B_MOUSE | 0.00464 | 0.00508 | 0.00257 | 0.01038 | 0.02356 | 0.01281 | 0.01579 | 0.00522 | 0.00613 | 0.00359 | 0.00000 | 0.01415 |
| P01868 | IGHG1_MOUSE | 0.00512 | 0.00112 | 0.00323 | 0.00191 | 0.00188 | 0.00226 | 0.00837 | 0.02026 | 0.02346 | 0.03575 | 0.03036 | 0.02120 |
| P01872 | IGHM_MOUSE  | 0.04556 | 0.02037 | 0.02000 | 0.03054 | 0.02326 | 0.02160 | 0.06903 | 0.04198 | 0.06036 | 0.04591 | 0.06671 | 0.02297 |
| P01898 | HA10_MOUSE  | 0.00740 | 0.00385 | 0.00571 | 0.00601 | 0.00514 | 0.00389 | 0.00037 | 0.00496 | 0.00367 | 0.01713 | 0.00940 | 0.00099 |
| P01899 | HA11_MOUSE  | 0.01613 | 0.01514 | 0.00715 | 0.00574 | 0.00596 | 0.00956 | 0.03277 | 0.04500 | 0.04456 | 0.04107 | 0.03375 | 0.04191 |
| P01901 | HA1B_MOUSE  | 0.00000 | 0.00000 | 0.00000 | 0.00000 | 0.00000 | 0.00000 | 0.02956 | 0.03680 | 0.03262 | 0.03659 | 0.02014 | 0.03483 |
| P01942 | HBA_MOUSE   | 0.30719 | 0.17303 | 0.40813 | 0.84134 | 0.39810 | 0.13502 | 3.08705 | 2.09247 | 1.18206 | 2.65642 | 2.84898 | 1.48933 |
| P02088 | HBB1_MOUSE  | 0.86314 | 0.49864 | 0.64415 | 1.55827 | 0.93174 | 0.42266 | 3.10491 | 1.66747 | 1.53052 | 2.90289 | 3.23936 | 1.53755 |
| P02089 | HBB2_MOUSE  | 0.00000 | 0.00000 | 0.00000 | 0.00000 | 0.00000 | 0.00000 | 0.01182 | 0.00174 | 0.00202 | 0.01123 | 0.00140 | 0.00016 |
| P84244 | H33_MOUSE   | 0.00000 | 0.00000 | 0.00000 | 0.00000 | 0.00000 | 0.00000 | 0.00363 | 0.44305 | 0.44043 | 0.42918 | 0.42183 | 0.68807 |
| P02463 | CO4A1_MOUSE | 0.00000 | 0.00000 | 0.00000 | 0.00000 | 0.00000 | 0.00000 | 0.10389 | 0.05505 | 0.05345 | 0.03295 | 0.13577 | 0.06042 |
| P02468 | LAMC1_MOUSE | 0.07037 | 0.14064 | 0.06665 | 0.08988 | 0.06984 | 0.09869 | 0.24591 | 0.16723 | 0.19359 | 0.12873 | 0.27580 | 0.22811 |
| P02469 | LAMB1_MOUSE | 0.01252 | 0.02321 | 0.02420 | 0.02306 | 0.02982 | 0.01375 | 0.03159 | 0.02562 | 0.02400 | 0.02151 | 0.02437 | 0.02941 |
| P03888 | NU1M_MOUSE  | 0.00674 | 0.00251 | 0.00580 | 0.00397 | 0.00552 | 0.00438 | 0.00334 | 0.00986 | 0.00744 | 0.00779 | 0.00645 | 0.00753 |
| P03911 | NU4M_MOUSE  | 0.00998 | 0.00247 | 0.01284 | 0.01173 | 0.00304 | 0.00350 | 0.00000 | 0.00141 | 0.00000 | 0.00133 | 0.00000 | 0.00114 |
| P03921 | NU5M_MOUSE  | 0.03616 | 0.02648 | 0.06620 | 0.05066 | 0.03110 | 0.03293 | 0.00475 | 0.00000 | 0.00000 | 0.00346 | 0.00000 | 0.00114 |
| P03930 | ATP8_MOUSE  | 0.00000 | 0.00000 | 0.00000 | 0.00000 | 0.00000 | 0.00000 | 0.02442 | 0.01074 | 0.00370 | 0.01509 | 0.00000 | 0.01675 |
| P03953 | CFAD_MOUSE  | 0.00000 | 0.00000 | 0.00000 | 0.00000 | 0.00000 | 0.00000 | 0.00375 | 0.00355 | 0.02006 | 0.00402 | 0.01650 | 0.00132 |
| P03958 | ADA_MOUSE   | 0.00000 | 0.00000 | 0.00000 | 0.00000 | 0.00000 | 0.00000 | 0.03126 | 0.00033 | 0.00028 | 0.00020 | 0.00022 | 0.00040 |
| P03987 | IGHG3_MOUSE | 0.02288 | 0.00396 | 0.00207 | 0.00557 | 0.00566 | 0.00221 | 0.00570 | 0.03472 | 0.03505 | 0.04252 | 0.00349 | 0.00049 |

|        |             |         |         |         |         |         |         |         |         |         |         |         |         |
|--------|-------------|---------|---------|---------|---------|---------|---------|---------|---------|---------|---------|---------|---------|
| P04117 | FABP4_MOUSE | 0.00000 | 0.00000 | 0.00000 | 0.00000 | 0.00000 | 0.00000 | 0.10977 | 0.02073 | 0.09291 | 0.02080 | 0.01436 | 0.01968 |
| P04186 | CFAB_MOUSE  | 0.00760 | 0.00251 | 0.00513 | 0.00820 | 0.00787 | 0.00322 | 0.00960 | 0.00623 | 0.00825 | 0.01100 | 0.00963 | 0.00588 |
| P04202 | TGFB1_MOUSE | 0.00000 | 0.00000 | 0.00000 | 0.00000 | 0.00000 | 0.00000 | 0.00000 | 0.00000 | 0.00000 | 0.00000 | 0.00000 | 0.00000 |
| P04223 | HA1K_MOUSE  | 0.00000 | 0.00000 | 0.00000 | 0.00000 | 0.00000 | 0.00000 | 0.00000 | 0.00837 | 0.00599 | 0.00744 | 0.01365 | 0.00000 |
| P04231 | HB23_MOUSE  | 0.00000 | 0.00000 | 0.00000 | 0.00000 | 0.00000 | 0.00000 | 0.00232 | 0.00140 | 0.00545 | 0.00562 | 0.00171 | 0.00531 |
| P04247 | MYG_MOUSE   | 1.77300 | 1.21328 | 2.10444 | 1.55629 | 1.18683 | 1.15700 | 0.18588 | 0.16688 | 0.29073 | 0.24547 | 0.14261 | 0.13691 |
| P04370 | MBP_MOUSE   | 0.00000 | 0.00000 | 0.00000 | 0.00000 | 0.00000 | 0.00000 | 0.01377 | 0.00354 | 0.02378 | 0.00318 | 0.00531 | 0.00068 |
| P04441 | HG2A_MOUSE  | 0.00000 | 0.00000 | 0.00000 | 0.00000 | 0.00000 | 0.00000 | 0.01219 | 0.00461 | 0.01428 | 0.01426 | 0.01736 | 0.01363 |
| P04444 | HBBZ_MOUSE  | 0.00000 | 0.00000 | 0.00000 | 0.00000 | 0.00000 | 0.00000 | 0.00554 | 0.00000 | 0.00000 | 0.00221 | 0.00313 | 0.00000 |
| P04627 | ARAF_MOUSE  | 0.00000 | 0.00000 | 0.00000 | 0.00000 | 0.00000 | 0.00000 | 0.00000 | 0.00000 | 0.00328 | 0.00109 | 0.00000 | 0.00132 |
| P04919 | B3AT_MOUSE  | 0.00178 | 0.00000 | 0.00127 | 0.00451 | 0.00254 | 0.00000 | 0.03696 | 0.01287 | 0.02138 | 0.05913 | 0.09335 | 0.00968 |
| P04925 | PRIO_MOUSE  | 0.00000 | 0.00000 | 0.00000 | 0.00000 | 0.00000 | 0.00000 | 0.00442 | 0.00373 | 0.00511 | 0.00230 | 0.00339 | 0.00222 |
| P04939 | MUP3_MOUSE  | 0.00000 | 0.00000 | 0.00000 | 0.00000 | 0.00000 | 0.00000 | 0.00000 | 0.00000 | 0.00012 | 0.00030 | 0.00023 | 0.00000 |
| P04945 | KV6AB_MOUSE | 0.00000 | 0.00000 | 0.00000 | 0.00000 | 0.00000 | 0.00000 | 0.00000 | 0.00057 | 0.00000 | 0.00081 | 0.00317 | 0.00417 |
| P05063 | ALDOC_MOUSE | 0.00081 | 0.00083 | 0.00032 | 0.00033 | 0.00045 | 0.00069 | 0.00000 | 0.00000 | 0.00116 | 0.00000 | 0.00000 | 0.00024 |
| P05064 | ALDOA_MOUSE | 0.27817 | 0.19847 | 0.18079 | 0.18004 | 0.21568 | 0.21036 | 0.20759 | 0.10215 | 0.10412 | 0.11183 | 0.08597 | 0.11513 |
| P05125 | ANF_MOUSE   | 0.00000 | 0.00000 | 0.00000 | 0.00000 | 0.00000 | 0.00000 | 0.00986 | 0.00285 | 0.00621 | 0.00441 | 0.00254 | 0.00268 |
| P05132 | KAPCA_MOUSE | 0.00236 | 0.00429 | 0.00373 | 0.00526 | 0.00433 | 0.00277 | 0.00916 | 0.00844 | 0.01310 | 0.00955 | 0.01445 | 0.01251 |
| P05201 | AATC_MOUSE  | 0.27636 | 0.27335 | 0.39299 | 0.32050 | 0.27746 | 0.28145 | 0.02199 | 0.02303 | 0.02391 | 0.02439 | 0.02300 | 0.01837 |
| P05202 | AATM_MOUSE  | 0.78606 | 0.82250 | 0.77606 | 0.77517 | 0.77903 | 0.94655 | 0.04909 | 0.09123 | 0.06193 | 0.07493 | 0.03822 | 0.06960 |
| P05213 | TBA1B_MOUSE | 0.00000 | 0.00000 | 0.00000 | 0.00000 | 0.00000 | 0.00000 | 0.65389 | 0.81730 | 0.53446 | 0.67304 | 0.54813 | 0.79138 |
| P05480 | SRC_MOUSE   | 0.00000 | 0.00000 | 0.00000 | 0.00000 | 0.00000 | 0.00000 | 0.00599 | 0.01070 | 0.00531 | 0.00585 | 0.00318 | 0.00754 |
| P05532 | KIT_MOUSE   | 0.00000 | 0.00000 | 0.00000 | 0.00000 | 0.00000 | 0.00000 | 0.00000 | 0.00128 | 0.00064 | 0.00164 | 0.00000 | 0.00084 |
| P05555 | ITAM_MOUSE  | 0.00000 | 0.00000 | 0.00000 | 0.00000 | 0.00000 | 0.00000 | 0.06827 | 0.03134 | 0.08689 | 0.05326 | 0.03436 | 0.01969 |
| P05977 | MYL1_MOUSE  | 0.00000 | 0.00000 | 0.00000 | 0.00000 | 0.00000 | 0.00000 | 0.09271 | 0.00050 | 0.00110 | 0.00056 | 0.00018 | 0.00000 |
| P06151 | LDHA_MOUSE  | 0.10535 | 0.12754 | 0.19901 | 0.16428 | 0.17784 | 0.11896 | 0.12600 | 0.12073 | 0.12219 | 0.11724 | 0.10887 | 0.10650 |
| P06330 | HVM51_MOUSE | 0.00150 | 1.98719 | 0.62407 | 0.00196 | 0.02229 | 0.95809 | 0.00609 | 0.00191 | 0.00578 | 0.00302 | 0.00299 | 0.00298 |
| P06537 | GCR_MOUSE   | 0.00000 | 0.00000 | 0.00000 | 0.00000 | 0.00000 | 0.00000 | 0.00197 | 0.00141 | 0.00286 | 0.00121 | 0.00124 | 0.00305 |
| P06683 | CO9_MOUSE   | 0.00000 | 0.00000 | 0.00000 | 0.00000 | 0.00000 | 0.00000 | 0.00764 | 0.00874 | 0.00239 | 0.01452 | 0.00204 | 0.00000 |
| P06684 | CO5_MOUSE   | 0.00291 | 0.00195 | 0.00194 | 0.00217 | 0.00249 | 0.00277 | 0.01811 | 0.02149 | 0.02354 | 0.02959 | 0.02304 | 0.01969 |
| P06728 | APOA4_MOUSE | 0.01252 | 0.00667 | 0.01002 | 0.01120 | 0.00803 | 0.00802 | 0.01351 | 0.01301 | 0.01660 | 0.02691 | 0.02865 | 0.01639 |
| P06745 | G6PI_MOUSE  | 0.28439 | 0.27186 | 0.36607 | 0.26552 | 0.28170 | 0.22603 | 0.08426 | 0.07516 | 0.08008 | 0.07443 | 0.08648 | 0.08308 |
| P06797 | CATL1_MOUSE | 0.00000 | 0.00000 | 0.00000 | 0.00000 | 0.00000 | 0.00000 | 0.00075 | 0.00644 | 0.00372 | 0.00320 | 0.00157 | 0.00173 |
| P06800 | PTPRC_MOUSE | 0.00000 | 0.00000 | 0.00000 | 0.00000 | 0.00000 | 0.00000 | 0.00743 | 0.00805 | 0.01645 | 0.01492 | 0.01727 | 0.01595 |

|        |             |         |         |         |         |         |         |         |         |         |         |         |         |
|--------|-------------|---------|---------|---------|---------|---------|---------|---------|---------|---------|---------|---------|---------|
| P06801 | MAOX_MOUSE  | 0.01058 | 0.00603 | 0.00884 | 0.00549 | 0.00884 | 0.00804 | 0.04088 | 0.03044 | 0.03769 | 0.02348 | 0.01934 | 0.02809 |
| P06802 | ENPP1_MOUSE | 0.00000 | 0.00000 | 0.00000 | 0.00000 | 0.00000 | 0.00000 | 0.00000 | 0.00000 | 0.00000 | 0.00000 | 0.00000 | 0.00000 |
| P06837 | NEUM_MOUSE  | 0.00000 | 0.00000 | 0.00000 | 0.00000 | 0.00000 | 0.00000 | 0.00000 | 0.00320 | 0.00617 | 0.00500 | 0.00484 | 0.00245 |
| P06869 | UROK_MOUSE  | 0.00000 | 0.00000 | 0.00000 | 0.00000 | 0.00000 | 0.00000 | 0.00000 | 0.00042 | 0.00000 | 0.00055 | 0.00078 | 0.00036 |
| P06909 | CFAH_MOUSE  | 0.01539 | 0.01913 | 0.00928 | 0.01257 | 0.01092 | 0.01078 | 0.01869 | 0.01595 | 0.01305 | 0.01611 | 0.02093 | 0.01678 |
| P07091 | S10A4_MOUSE | 0.00000 | 0.00000 | 0.00000 | 0.00000 | 0.00000 | 0.00000 | 0.00433 | 0.00277 | 0.00411 | 0.00376 | 0.00467 | 0.00280 |
| P07214 | SPRC_MOUSE  | 0.00000 | 0.00000 | 0.00000 | 0.00000 | 0.00000 | 0.00000 | 0.00000 | 0.00116 | 0.00443 | 0.00185 | 0.00103 | 0.00087 |
| P07309 | TTHY_MOUSE  | 0.03801 | 0.00969 | 0.02862 | 0.02693 | 0.02284 | 0.00587 | 0.05229 | 0.04371 | 0.08150 | 0.08400 | 0.06131 | 0.06318 |
| P07310 | KCRM_MOUSE  | 1.32109 | 1.22987 | 1.04328 | 0.96496 | 1.34152 | 1.30737 | 0.44614 | 0.03387 | 0.03961 | 0.03779 | 0.02753 | 0.02770 |
| P07356 | ANXA2_MOUSE | 0.03968 | 0.13015 | 0.05220 | 0.08262 | 0.06282 | 0.10785 | 0.23482 | 0.23635 | 0.21510 | 0.21687 | 0.22776 | 0.21760 |
| P07724 | ALBU_MOUSE  | 4.12579 | 3.07294 | 3.60903 | 6.13628 | 5.06740 | 3.60449 | 1.21023 | 1.47544 | 1.81558 | 2.17664 | 1.76166 | 1.60203 |
| P07759 | SPA3K_MOUSE | 0.01115 | 0.00276 | 0.00552 | 0.01370 | 0.00266 | 0.00278 | 0.68512 | 0.51680 | 0.50382 | 0.49478 | 0.65322 | 0.37265 |
| P07901 | HS90A_MOUSE | 0.03626 | 0.03026 | 0.04117 | 0.03005 | 0.03102 | 0.02272 | 0.12413 | 0.12915 | 0.14984 | 0.13380 | 0.13189 | 0.14299 |
| P08003 | PDIA4_MOUSE | 0.00670 | 0.00348 | 0.00484 | 0.00408 | 0.00376 | 0.00462 | 0.04714 | 0.04480 | 0.05083 | 0.05260 | 0.03800 | 0.05384 |
| P08030 | APT_MOUSE   | 0.00000 | 0.00000 | 0.00000 | 0.00000 | 0.00000 | 0.00000 | 0.00000 | 0.00484 | 0.00785 | 0.00611 | 0.00772 | 0.00718 |
| P08032 | SPTA1_MOUSE | 0.00860 | 0.01318 | 0.01073 | 0.01343 | 0.01188 | 0.01083 | 0.01737 | 0.00174 | 0.00623 | 0.03348 | 0.06303 | 0.00152 |
| P08071 | TRFL_MOUSE  | 0.00000 | 0.00000 | 0.00000 | 0.00000 | 0.00000 | 0.00000 | 0.01290 | 0.01296 | 0.00681 | 0.00773 | 0.01854 | 0.01858 |
| P08074 | CBR2_MOUSE  | 0.00000 | 0.00000 | 0.00000 | 0.00000 | 0.00000 | 0.00000 | 1.07335 | 1.24528 | 0.48623 | 0.63255 | 0.47685 | 0.81269 |
| P08103 | HCK_MOUSE   | 0.00000 | 0.00000 | 0.00000 | 0.00000 | 0.00000 | 0.00000 | 0.00860 | 0.00972 | 0.00634 | 0.00620 | 0.00668 | 0.00903 |
| P08113 | ENPL_MOUSE  | 0.02288 | 0.01460 | 0.02873 | 0.02307 | 0.02183 | 0.02559 | 0.08119 | 0.07668 | 0.10460 | 0.09018 | 0.08206 | 0.08473 |
| P08121 | CO3A1_MOUSE | 0.00000 | 0.00000 | 0.00000 | 0.00000 | 0.00000 | 0.00000 | 0.00000 | 0.00191 | 0.00000 | 0.00000 | 0.00085 | 0.00000 |
| P08122 | CO4A2_MOUSE | 0.00370 | 0.00578 | 0.00407 | 0.00401 | 0.00193 | 0.00085 | 0.15555 | 0.16254 | 0.17958 | 0.09986 | 0.24488 | 0.16432 |
| P08207 | S10AA_MOUSE | 0.00000 | 0.00000 | 0.00000 | 0.00000 | 0.00000 | 0.00000 | 0.05186 | 0.01713 | 0.05795 | 0.03420 | 0.05224 | 0.02076 |
| P08226 | APOE_MOUSE  | 0.01120 | 0.00605 | 0.00900 | 0.01068 | 0.00977 | 0.00574 | 0.01284 | 0.01230 | 0.01641 | 0.01630 | 0.01861 | 0.01109 |
| P08228 | SODC_MOUSE  | 0.00000 | 0.00000 | 0.00000 | 0.00000 | 0.00000 | 0.00000 | 0.14308 | 0.14138 | 0.18840 | 0.14905 | 0.17937 | 0.13314 |
| P08249 | MDHM_MOUSE  | 1.18973 | 1.01241 | 0.99698 | 0.99531 | 1.06942 | 1.52054 | 0.24697 | 0.23673 | 0.19283 | 0.17594 | 0.13541 | 0.16922 |
| P08551 | NFL_MOUSE   | 0.00000 | 0.00000 | 0.00000 | 0.00000 | 0.00000 | 0.00000 | 0.00000 | 0.00509 | 0.00372 | 0.00000 | 0.00000 | 0.00000 |
| P08553 | NFM_MOUSE   | 0.00000 | 0.00000 | 0.00000 | 0.00000 | 0.00000 | 0.00000 | 0.00227 | 0.00037 | 0.00766 | 0.00000 | 0.00041 | 0.00000 |
| P08556 | RASN_MOUSE  | 0.00374 | 0.00022 | 0.00231 | 0.00146 | 0.00065 | 0.00084 | 0.00368 | 0.01327 | 0.00382 | 0.00471 | 0.00296 | 0.00548 |
| P08752 | GNAI2_MOUSE | 0.04228 | 0.04325 | 0.03726 | 0.03708 | 0.03245 | 0.03988 | 0.10940 | 0.15398 | 0.09781 | 0.11688 | 0.09355 | 0.14670 |
| P08905 | LYZ2_MOUSE  | 0.00000 | 0.00000 | 0.00000 | 0.00000 | 0.00000 | 0.00000 | 0.04733 | 0.04046 | 0.01874 | 0.02234 | 0.00440 | 0.03371 |
| P09041 | PGK2_MOUSE  | 0.00000 | 0.00000 | 0.00000 | 0.00000 | 0.00000 | 0.00000 | 0.00000 | 0.00000 | 0.00056 | 0.00051 | 0.00064 | 0.00000 |
| P09055 | ITB1_MOUSE  | 0.00051 | 0.00074 | 0.00063 | 0.00081 | 0.00073 | 0.00036 | 0.05962 | 0.07923 | 0.06221 | 0.06126 | 0.05738 | 0.07845 |
| P09103 | PDIA1_MOUSE | 0.04023 | 0.03091 | 0.03357 | 0.03030 | 0.03666 | 0.03099 | 0.13053 | 0.12926 | 0.15722 | 0.15106 | 0.14043 | 0.12630 |

|        |             |         |         |         |         |         |         |         |         |         |         |         |         |
|--------|-------------|---------|---------|---------|---------|---------|---------|---------|---------|---------|---------|---------|---------|
| P09242 | PPBT_MOUSE  | 0.00000 | 0.00000 | 0.00000 | 0.00000 | 0.00000 | 0.00000 | 0.00223 | 0.00217 | 0.00212 | 0.00281 | 0.00315 | 0.00248 |
| P09405 | NUCL_MOUSE  | 0.00538 | 0.01384 | 0.00668 | 0.00288 | 0.00753 | 0.01280 | 0.04277 | 0.03581 | 0.03667 | 0.03637 | 0.03757 | 0.04180 |
| P09411 | PGK1_MOUSE  | 0.21387 | 0.18441 | 0.31293 | 0.27560 | 0.24574 | 0.24294 | 0.11239 | 0.08664 | 0.09043 | 0.08615 | 0.09583 | 0.10210 |
| P09470 | ACE_MOUSE   | 0.00000 | 0.00000 | 0.00000 | 0.00000 | 0.00000 | 0.00000 | 0.05966 | 0.07373 | 0.05834 | 0.06152 | 0.06828 | 0.06310 |
| P09528 | FRIH_MOUSE  | 0.00000 | 0.00000 | 0.00000 | 0.00000 | 0.00000 | 0.00000 | 0.00238 | 0.00957 | 0.02112 | 0.01464 | 0.01101 | 0.01194 |
| P09541 | MYL4_MOUSE  | 0.01227 | 0.01226 | 0.00900 | 0.01322 | 0.01804 | 0.02203 | 0.09240 | 0.15138 | 0.09084 | 0.15556 | 0.10331 | 0.10155 |
| P09542 | MYL3_MOUSE  | 1.17670 | 0.49711 | 0.85716 | 0.81888 | 0.83030 | 0.51797 | 0.33958 | 0.00687 | 0.00969 | 0.01536 | 0.00403 | 0.00367 |
| P09671 | SODM_MOUSE  | 0.15930 | 0.18698 | 0.21283 | 0.14269 | 0.10924 | 0.17969 | 0.00586 | 0.04199 | 0.03039 | 0.02881 | 0.02366 | 0.01814 |
| P09803 | CADH1_MOUSE | 0.00000 | 0.00000 | 0.00000 | 0.00000 | 0.00000 | 0.00000 | 0.02632 | 0.02904 | 0.03380 | 0.03005 | 0.04149 | 0.04020 |
| P09813 | APOA2_MOUSE | 0.00000 | 0.00000 | 0.00000 | 0.00000 | 0.00000 | 0.00000 | 0.00000 | 0.00486 | 0.01448 | 0.03825 | 0.01970 | 0.00647 |
| P09925 | SURF1_MOUSE | 0.00163 | 0.00073 | 0.00336 | 0.00135 | 0.00214 | 0.00146 | 0.00000 | 0.00000 | 0.00000 | 0.00000 | 0.00000 | 0.00000 |
| POC0A3 | CHMP6_MOUSE | 0.00000 | 0.00000 | 0.00000 | 0.00000 | 0.00000 | 0.00000 | 0.00000 | 0.00991 | 0.00979 | 0.01280 | 0.00569 | 0.00994 |
| Q3THW5 | H2AV_MOUSE  | 0.00000 | 0.00000 | 0.00000 | 0.00000 | 0.00000 | 0.00000 | 0.01674 | 0.02444 | 0.02263 | 0.01541 | 0.01835 | 0.01487 |
| POC605 | KGP1_MOUSE  | 0.00000 | 0.00000 | 0.00000 | 0.00000 | 0.00000 | 0.00000 | 0.00742 | 0.00728 | 0.01072 | 0.00856 | 0.00952 | 0.00761 |
| POC8K7 | SMIM1_MOUSE | 0.00000 | 0.00000 | 0.00000 | 0.00000 | 0.00000 | 0.00000 | 0.00000 | 0.00357 | 0.00428 | 0.00346 | 0.00247 | 0.00168 |
| P62984 | RL40_MOUSE  | 0.00000 | 0.00000 | 0.00000 | 0.00000 | 0.00000 | 0.00000 | 0.21803 | 0.50992 | 0.43333 | 0.47672 | 0.21174 | 0.36201 |
| PODN34 | NDUB1_MOUSE | 0.00000 | 0.00000 | 0.00000 | 0.00000 | 0.00000 | 0.00000 | 0.00566 | 0.01051 | 0.00716 | 0.00765 | 0.00436 | 0.00339 |
| PODN91 | T254C_MOUSE | 0.00000 | 0.00000 | 0.00000 | 0.00000 | 0.00000 | 0.00000 | 0.00000 | 0.00253 | 0.00000 | 0.00000 | 0.00000 | 0.00106 |
| PODOV1 | IFI5B_MOUSE | 0.00000 | 0.00000 | 0.00000 | 0.00000 | 0.00000 | 0.00000 | 0.00000 | 0.00000 | 0.00110 | 0.00024 | 0.00055 | 0.00031 |
| PODP28 | CALM3_MOUSE | 0.00000 | 0.00000 | 0.00000 | 0.00000 | 0.00000 | 0.00000 | 0.48969 | 0.46023 | 0.49756 | 0.44673 | 0.55582 | 0.44629 |
| P10107 | ANXA1_MOUSE | 0.00452 | 0.00357 | 0.00361 | 0.00522 | 0.00509 | 0.00577 | 0.19762 | 0.20244 | 0.25699 | 0.25505 | 0.28781 | 0.25427 |
| P10126 | EF1A1_MOUSE | 0.00933 | 0.00962 | 0.01107 | 0.01967 | 0.00864 | 0.01145 | 0.13781 | 0.25513 | 0.16343 | 0.19346 | 0.16725 | 0.18543 |
| P10417 | BCL2_MOUSE  | 0.00000 | 0.00000 | 0.00000 | 0.00000 | 0.00000 | 0.00000 | 0.00000 | 0.00089 | 0.00060 | 0.00125 | 0.00176 | 0.00144 |
| P10493 | NID1_MOUSE  | 0.04544 | 0.03477 | 0.02173 | 0.03247 | 0.05569 | 0.02378 | 0.07215 | 0.08214 | 0.06785 | 0.06327 | 0.06457 | 0.07171 |
| P10518 | HEM2_MOUSE  | 0.00817 | 0.00460 | 0.01250 | 0.02784 | 0.01913 | 0.01425 | 0.00875 | 0.01620 | 0.01956 | 0.01729 | 0.01520 | 0.01149 |
| P10605 | CATB_MOUSE  | 0.00832 | 0.00350 | 0.01104 | 0.00677 | 0.00956 | 0.00530 | 0.01189 | 0.00703 | 0.00793 | 0.00502 | 0.00616 | 0.00430 |
| P10630 | IF4A2_MOUSE | 0.00176 | 0.00367 | 0.00159 | 0.00473 | 0.00141 | 0.00344 | 0.00326 | 0.02637 | 0.02470 | 0.01722 | 0.02224 | 0.01531 |
| P10637 | TAU_MOUSE   | 0.00000 | 0.00000 | 0.00000 | 0.00000 | 0.00000 | 0.00000 | 0.01330 | 0.02637 | 0.02339 | 0.02317 | 0.01916 | 0.02338 |
| P10639 | THIO_MOUSE  | 0.00000 | 0.00000 | 0.00000 | 0.00000 | 0.00000 | 0.00000 | 0.01277 | 0.06796 | 0.02053 | 0.02983 | 0.00946 | 0.01320 |
| P10649 | GSTM1_MOUSE | 0.12071 | 0.10947 | 0.09035 | 0.06401 | 0.10555 | 0.10762 | 0.23240 | 0.51344 | 0.32307 | 0.36821 | 0.30363 | 0.37539 |
| P10711 | TCEA1_MOUSE | 0.00000 | 0.00000 | 0.00000 | 0.00000 | 0.00000 | 0.00000 | 0.00142 | 0.00284 | 0.00469 | 0.00462 | 0.00272 | 0.00542 |
| P10810 | CD14_MOUSE  | 0.00000 | 0.00000 | 0.00000 | 0.00000 | 0.00000 | 0.00000 | 0.00160 | 0.00418 | 0.00677 | 0.00000 | 0.00186 | 0.00415 |
| P10833 | RRAS_MOUSE  | 0.00000 | 0.00000 | 0.00000 | 0.00000 | 0.00000 | 0.00000 | 0.09455 | 0.11689 | 0.12750 | 0.13365 | 0.14236 | 0.13690 |
| P10852 | 4F2_MOUSE   | 0.00000 | 0.00000 | 0.00000 | 0.00000 | 0.00000 | 0.00000 | 0.00482 | 0.00506 | 0.00606 | 0.00531 | 0.00516 | 0.00626 |

|        |             |         |         |         |         |         |         |         |         |         |         |         |         |
|--------|-------------|---------|---------|---------|---------|---------|---------|---------|---------|---------|---------|---------|---------|
| Q8CGP2 | H2B1P_MOUSE | 0.00000 | 0.00000 | 0.00000 | 0.00000 | 0.00000 | 0.00000 | 0.88333 | 1.66691 | 1.45789 | 1.38032 | 1.22383 | 1.70555 |
| P10922 | H10_MOUSE   | 0.00000 | 0.00000 | 0.00000 | 0.00000 | 0.00000 | 0.00000 | 0.12021 | 0.19756 | 0.16211 | 0.17325 | 0.09975 | 0.18898 |
| P11031 | TCP4_MOUSE  | 0.00000 | 0.00000 | 0.00000 | 0.00000 | 0.00000 | 0.00000 | 0.00840 | 0.01244 | 0.01139 | 0.01113 | 0.01640 | 0.01511 |
| P21812 | MCPT4_MOUSE | 0.00000 | 0.00000 | 0.00000 | 0.00000 | 0.00000 | 0.00000 | 0.00000 | 0.00000 | 0.00329 | 0.00000 | 0.00000 | 0.00000 |
| P11087 | CO1A1_MOUSE | 0.00000 | 0.00000 | 0.00000 | 0.00000 | 0.00000 | 0.00000 | 0.20184 | 0.35953 | 0.23389 | 0.15119 | 0.34391 | 0.18047 |
| P11103 | PARP1_MOUSE | 0.00000 | 0.00000 | 0.00000 | 0.00000 | 0.00000 | 0.00000 | 0.01064 | 0.01217 | 0.00919 | 0.01406 | 0.00000 | 0.01292 |
| P11152 | LIPL_MOUSE  | 0.01794 | 0.02977 | 0.02388 | 0.01827 | 0.02802 | 0.01807 | 0.00211 | 0.00089 | 0.00316 | 0.00160 | 0.00252 | 0.00239 |
| P11247 | PERM_MOUSE  | 0.00000 | 0.00000 | 0.00000 | 0.00000 | 0.00000 | 0.00000 | 0.01095 | 0.00808 | 0.00456 | 0.00721 | 0.01358 | 0.01585 |
| P11276 | FINC_MOUSE  | 0.01190 | 0.00566 | 0.00662 | 0.01818 | 0.00694 | 0.00832 | 0.08449 | 0.05123 | 0.05275 | 0.04942 | 0.06830 | 0.05080 |
| P11352 | GPX1_MOUSE  | 0.00000 | 0.00000 | 0.00000 | 0.00000 | 0.00000 | 0.00000 | 0.04418 | 0.03629 | 0.04181 | 0.04523 | 0.04911 | 0.04623 |
| P11404 | FABPH_MOUSE | 0.05203 | 0.00839 | 0.03570 | 0.03605 | 0.01708 | 0.00186 | 0.00000 | 0.00000 | 0.00000 | 0.00738 | 0.00000 | 0.00000 |
| P11438 | LAMP1_MOUSE | 0.00000 | 0.00000 | 0.00000 | 0.00000 | 0.00000 | 0.00000 | 0.00000 | 0.02112 | 0.02026 | 0.01898 | 0.01128 | 0.00829 |
| P11499 | HS90B_MOUSE | 0.24017 | 0.18022 | 0.22954 | 0.17518 | 0.13916 | 0.13343 | 0.21958 | 0.19262 | 0.23772 | 0.22665 | 0.23645 | 0.20583 |
| P11531 | DMD_MOUSE   | 0.11310 | 0.12733 | 0.11908 | 0.10112 | 0.11873 | 0.09586 | 0.01016 | 0.01045 | 0.00784 | 0.00651 | 0.01228 | 0.00895 |
| P11589 | MUP2_MOUSE  | 0.00000 | 0.00000 | 0.00000 | 0.00000 | 0.00000 | 0.00000 | 0.00021 | 0.00000 | 0.00000 | 0.00000 | 0.00011 | 0.00040 |
| P11672 | NGAL_MOUSE  | 0.00000 | 0.00000 | 0.00000 | 0.00000 | 0.00000 | 0.00000 | 0.00109 | 0.00841 | 0.00504 | 0.00392 | 0.00213 | 0.00895 |
| P11679 | K2C8_MOUSE  | 0.00000 | 0.00000 | 0.00000 | 0.00000 | 0.00000 | 0.00000 | 0.11835 | 0.15729 | 0.12468 | 0.15556 | 0.11802 | 0.14233 |
| P11688 | ITA5_MOUSE  | 0.00000 | 0.00000 | 0.00000 | 0.00000 | 0.00000 | 0.00000 | 0.00771 | 0.00361 | 0.01102 | 0.00526 | 0.00387 | 0.00564 |
| P11714 | CP2D9_MOUSE | 0.00000 | 0.00000 | 0.00000 | 0.00000 | 0.00000 | 0.00000 | 0.00000 | 0.00000 | 0.00000 | 0.00000 | 0.00000 | 0.00000 |
| P11835 | ITB2_MOUSE  | 0.00000 | 0.00000 | 0.00000 | 0.00000 | 0.00000 | 0.00000 | 0.00943 | 0.00981 | 0.01420 | 0.01311 | 0.01524 | 0.01529 |
| P11862 | GAS2_MOUSE  | 0.00000 | 0.00000 | 0.00000 | 0.00000 | 0.00000 | 0.00000 | 0.00004 | 0.00000 | 0.00005 | 0.00015 | 0.00007 | 0.00000 |
| P11881 | ITPR1_MOUSE | 0.00000 | 0.00000 | 0.00000 | 0.00000 | 0.00000 | 0.00000 | 0.00877 | 0.00609 | 0.00621 | 0.00702 | 0.00000 | 0.00527 |
| P11911 | CD79A_MOUSE | 0.00000 | 0.00000 | 0.00000 | 0.00000 | 0.00000 | 0.00000 | 0.00000 | 0.00000 | 0.00000 | 0.00000 | 0.00000 | 0.00240 |
| P11928 | OAS1A_MOUSE | 0.00000 | 0.00000 | 0.00000 | 0.00000 | 0.00000 | 0.00000 | 0.00000 | 0.00000 | 0.00433 | 0.00066 | 0.00278 | 0.00183 |
| P11930 | NUD19_MOUSE | 0.00000 | 0.00000 | 0.00000 | 0.00000 | 0.00000 | 0.00000 | 0.00000 | 0.00004 | 0.00033 | 0.00010 | 0.00000 | 0.00000 |
| P11983 | TCPA_MOUSE  | 0.00227 | 0.00403 | 0.00187 | 0.00105 | 0.00209 | 0.00180 | 0.02691 | 0.02091 | 0.03227 | 0.02583 | 0.02813 | 0.02705 |
| P12023 | A4_MOUSE    | 0.00000 | 0.00000 | 0.00000 | 0.00000 | 0.00000 | 0.00000 | 0.00796 | 0.00796 | 0.01117 | 0.01017 | 0.00643 | 0.01143 |
| P12242 | UCP1_MOUSE  | 0.00000 | 0.00000 | 0.00000 | 0.00000 | 0.00000 | 0.00000 | 0.02884 | 0.00000 | 0.00000 | 0.00000 | 0.00000 | 0.00114 |
| P12265 | BGLR_MOUSE  | 0.00000 | 0.00000 | 0.00000 | 0.00000 | 0.00000 | 0.00000 | 0.00144 | 0.00477 | 0.00777 | 0.00343 | 0.00662 | 0.00255 |
| P12367 | KAP2_MOUSE  | 0.00577 | 0.00547 | 0.00532 | 0.00564 | 0.00551 | 0.00727 | 0.04186 | 0.09209 | 0.05014 | 0.04938 | 0.05193 | 0.05994 |
| P12382 | PFKAL_MOUSE | 0.00913 | 0.01063 | 0.01125 | 0.01194 | 0.00984 | 0.00578 | 0.01484 | 0.01095 | 0.01568 | 0.01131 | 0.01585 | 0.01163 |
| P12658 | CALB1_MOUSE | 0.00000 | 0.00000 | 0.00000 | 0.00000 | 0.00000 | 0.00000 | 0.00055 | 0.00005 | 0.00039 | 0.00041 | 0.00055 | 0.00000 |
| P12710 | FABPL_MOUSE | 0.00000 | 0.00000 | 0.00000 | 0.00000 | 0.00000 | 0.00000 | 0.00567 | 0.00537 | 0.00585 | 0.00457 | 0.00503 | 0.00577 |
| P12787 | COX5A_MOUSE | 0.06655 | 0.04123 | 0.07966 | 0.11091 | 0.11464 | 0.18349 | 0.03321 | 0.02879 | 0.02386 | 0.02907 | 0.02140 | 0.02605 |



|        |             |         |         |         |         |         |         |         |         |         |         |         |         |
|--------|-------------|---------|---------|---------|---------|---------|---------|---------|---------|---------|---------|---------|---------|
| P12791 | CP2BA_MOUSE | 0.00000 | 0.00000 | 0.00000 | 0.00000 | 0.00000 | 0.00000 | 0.04058 | 0.03853 | 0.03297 | 0.04171 | 0.04256 | 0.04341 |
| P12815 | PDCD6_MOUSE | 0.00000 | 0.00000 | 0.00000 | 0.00000 | 0.00000 | 0.00000 | 0.01417 | 0.01492 | 0.01420 | 0.01249 | 0.01461 | 0.01311 |
| P12970 | RL7A_MOUSE  | 0.01609 | 0.02892 | 0.01885 | 0.01117 | 0.01717 | 0.08144 | 0.02386 | 0.02964 | 0.03977 | 0.02860 | 0.02774 | 0.03851 |
| Q6T707 | SCD4_MOUSE  | 0.00000 | 0.00000 | 0.00000 | 0.00000 | 0.00000 | 0.00000 | 0.00000 | 0.00000 | 0.00000 | 0.00000 | 0.00000 | 0.00000 |
| P13020 | GELS_MOUSE  | 0.01912 | 0.01646 | 0.00830 | 0.01487 | 0.01063 | 0.01394 | 0.11610 | 0.10489 | 0.13176 | 0.12746 | 0.12365 | 0.10289 |
| P13412 | TNNI2_MOUSE | 0.00000 | 0.00000 | 0.00000 | 0.00000 | 0.00000 | 0.00000 | 0.08391 | 0.00000 | 0.00005 | 0.00000 | 0.00000 | 0.00000 |
| P13541 | MYH3_MOUSE  | 0.00266 | 0.00261 | 0.00392 | 0.00365 | 0.00245 | 0.00271 | 0.05661 | 0.05426 | 0.00000 | 0.06067 | 0.01522 | 0.01459 |
| P13542 | MYH8_MOUSE  | 0.00022 | 0.00130 | 0.00037 | 0.00484 | 0.00033 | 0.00042 | 0.35381 | 0.00003 | 0.00004 | 0.00003 | 0.00002 | 0.00002 |
| P13597 | ICAM1_MOUSE | 0.00000 | 0.00000 | 0.00000 | 0.00000 | 0.00000 | 0.00000 | 0.03843 | 0.06064 | 0.07130 | 0.06923 | 0.05680 | 0.07064 |
| P13609 | SRGN_MOUSE  | 0.00000 | 0.00000 | 0.00000 | 0.00000 | 0.00000 | 0.00000 | 0.00000 | 0.00051 | 0.00000 | 0.00316 | 0.00000 | 0.00348 |
| P13634 | CAH1_MOUSE  | 0.00000 | 0.00000 | 0.00000 | 0.00000 | 0.00000 | 0.00000 | 0.03105 | 0.01051 | 0.01293 | 0.03966 | 0.06161 | 0.00647 |
| P13707 | GPDA_MOUSE  | 0.01054 | 0.00458 | 0.00727 | 0.00728 | 0.00610 | 0.00652 | 0.03198 | 0.01034 | 0.01832 | 0.00631 | 0.00222 | 0.00984 |
| P13745 | GSTA1_MOUSE | 0.00004 | 0.00060 | 0.00045 | 0.00027 | 0.00070 | 0.00037 | 0.00000 | 0.00473 | 0.00173 | 0.00193 | 0.00178 | 0.01622 |
| P13864 | DNMT1_MOUSE | 0.00000 | 0.00000 | 0.00000 | 0.00000 | 0.00000 | 0.00000 | 0.01194 | 0.00101 | 0.00498 | 0.00920 | 0.02161 | 0.00478 |
| P14069 | S10A6_MOUSE | 0.00000 | 0.00000 | 0.00000 | 0.00000 | 0.00000 | 0.00000 | 0.01169 | 0.13819 | 0.11928 | 0.16225 | 0.05787 | 0.05768 |
| P14094 | AT1B1_MOUSE | 0.06357 | 0.06780 | 0.03703 | 0.02930 | 0.05461 | 0.08222 | 0.02324 | 0.01779 | 0.01585 | 0.01730 | 0.00564 | 0.01788 |
| P14115 | RL27A_MOUSE | 0.00000 | 0.00000 | 0.00000 | 0.00000 | 0.00000 | 0.00000 | 0.00791 | 0.02374 | 0.00890 | 0.01728 | 0.01017 | 0.02292 |
| P14131 | RS16_MOUSE  | 0.00000 | 0.00000 | 0.00000 | 0.00000 | 0.00000 | 0.00000 | 0.05539 | 0.04264 | 0.05798 | 0.06428 | 0.05857 | 0.07179 |
| P14148 | RL7_MOUSE   | 0.00000 | 0.00000 | 0.00000 | 0.00000 | 0.00000 | 0.00000 | 0.04874 | 0.05153 | 0.06638 | 0.05707 | 0.04704 | 0.06367 |
| P14152 | MDHC_MOUSE  | 0.88852 | 1.05491 | 1.15342 | 0.95855 | 0.97203 | 1.09287 | 0.12869 | 0.15515 | 0.10146 | 0.13107 | 0.11271 | 0.12932 |
| P14206 | RSSA_MOUSE  | 0.05046 | 0.03567 | 0.03481 | 0.02341 | 0.03983 | 0.03214 | 0.04465 | 0.02824 | 0.02758 | 0.03043 | 0.03343 | 0.02974 |
| P14211 | CALR_MOUSE  | 0.00000 | 0.00000 | 0.00000 | 0.00000 | 0.00000 | 0.00000 | 0.06669 | 0.09152 | 0.09538 | 0.09583 | 0.09962 | 0.08794 |
| P14220 | GLPA_MOUSE  | 0.00000 | 0.00000 | 0.00000 | 0.00000 | 0.00000 | 0.00000 | 0.00000 | 0.00000 | 0.00000 | 0.00052 | 0.00000 | 0.00000 |
| P14246 | GTR2_MOUSE  | 0.00000 | 0.00000 | 0.00000 | 0.00000 | 0.00000 | 0.00000 | 0.00000 | 0.00000 | 0.00000 | 0.00000 | 0.00000 | 0.00000 |
| P14426 | HA13_MOUSE  | 0.00000 | 0.00000 | 0.00000 | 0.00000 | 0.00000 | 0.00000 | 0.00510 | 0.00000 | 0.00289 | 0.00471 | 0.00000 | 0.00651 |
| P14429 | HA17_MOUSE  | 0.00000 | 0.00000 | 0.00000 | 0.00000 | 0.00000 | 0.00000 | 0.00000 | 0.00276 | 0.00198 | 0.00146 | 0.00389 | 0.00434 |
| P14438 | HA2U_MOUSE  | 0.00000 | 0.00000 | 0.00000 | 0.00000 | 0.00000 | 0.00000 | 0.00730 | 0.00841 | 0.01779 | 0.01470 | 0.01061 | 0.01154 |
| P14483 | HB2A_MOUSE  | 0.00000 | 0.00000 | 0.00000 | 0.00000 | 0.00000 | 0.00000 | 0.00025 | 0.00862 | 0.00980 | 0.00660 | 0.00215 | 0.00736 |
| P14576 | SRP54_MOUSE | 0.00000 | 0.00000 | 0.00000 | 0.00000 | 0.00000 | 0.00000 | 0.00489 | 0.00746 | 0.00986 | 0.00698 | 0.00979 | 0.00658 |
| P14602 | HSPB1_MOUSE | 0.03024 | 0.01695 | 0.02417 | 0.01153 | 0.01509 | 0.02553 | 0.07327 | 0.07046 | 0.05943 | 0.04949 | 0.04146 | 0.05428 |
| P14685 | PSMD3_MOUSE | 0.00153 | 0.00414 | 0.00386 | 0.00232 | 0.00223 | 0.00109 | 0.01430 | 0.01317 | 0.01696 | 0.01528 | 0.01922 | 0.01649 |
| P14733 | LMNB1_MOUSE | 0.00831 | 0.00351 | 0.00386 | 0.00490 | 0.00927 | 0.01011 | 0.04390 | 0.05457 | 0.07052 | 0.06040 | 0.05840 | 0.07125 |
| P14824 | ANXA6_MOUSE | 0.21169 | 0.17197 | 0.21012 | 0.15656 | 0.29940 | 0.16945 | 0.19330 | 0.17054 | 0.19558 | 0.17313 | 0.23618 | 0.20616 |
| P14869 | RLA0_MOUSE  | 0.00157 | 0.00091 | 0.00228 | 0.00168 | 0.00327 | 0.00089 | 0.11870 | 0.07449 | 0.10517 | 0.09397 | 0.09516 | 0.09658 |

|        |              |         |         |         |         |         |         |         |         |         |         |         |         |
|--------|--------------|---------|---------|---------|---------|---------|---------|---------|---------|---------|---------|---------|---------|
| P14873 | MAP1B_MOUSE  | 0.00000 | 0.00000 | 0.00000 | 0.00000 | 0.00000 | 0.00000 | 0.00865 | 0.00444 | 0.01330 | 0.00997 | 0.00982 | 0.00317 |
| P15089 | CBPA3_MOUSE  | 0.00000 | 0.00000 | 0.00000 | 0.00000 | 0.00000 | 0.00000 | 0.00932 | 0.00000 | 0.01190 | 0.00061 | 0.00069 | 0.00000 |
| P15105 | GLNA_MOUSE   | 0.01083 | 0.02067 | 0.01139 | 0.00993 | 0.00936 | 0.00677 | 0.00949 | 0.01039 | 0.01346 | 0.00786 | 0.00843 | 0.00925 |
| P15306 | TRBM_MOUSE   | 0.00000 | 0.00000 | 0.00000 | 0.00000 | 0.00000 | 0.00000 | 0.00000 | 0.02945 | 0.03180 | 0.02268 | 0.01261 | 0.01258 |
| P15327 | PMGE_MOUSE   | 0.00000 | 0.00000 | 0.00000 | 0.00000 | 0.00000 | 0.00000 | 0.00481 | 0.00246 | 0.00363 | 0.01510 | 0.01787 | 0.00023 |
| P15379 | CD44_MOUSE   | 0.00000 | 0.00000 | 0.00000 | 0.00000 | 0.00000 | 0.00000 | 0.01981 | 0.02157 | 0.01432 | 0.01404 | 0.01475 | 0.01762 |
| P15392 | CP2A4_MOUSE  | 0.00000 | 0.00000 | 0.00000 | 0.00000 | 0.00000 | 0.00000 | 0.00483 | 0.00057 | 0.00162 | 0.00225 | 0.00103 | 0.00131 |
| P15501 | SPBP_MOUSE   | 0.00000 | 0.00000 | 0.00000 | 0.00000 | 0.00000 | 0.00000 | 0.00000 | 0.00000 | 0.00000 | 0.00017 | 0.00036 | 0.00000 |
| P15508 | SPTB1_MOUSE  | 0.04989 | 0.05134 | 0.02673 | 0.05198 | 0.04818 | 0.03963 | 0.02424 | 0.00633 | 0.00734 | 0.01959 | 0.03550 | 0.00396 |
| P15532 | NDKA_MOUSE   | 0.00243 | 0.00184 | 0.00194 | 0.00226 | 0.00233 | 0.00130 | 0.01135 | 0.01581 | 0.01606 | 0.01474 | 0.00732 | 0.01398 |
| P15626 | GSTM2_MOUSE  | 0.05342 | 0.06089 | 0.04950 | 0.04346 | 0.04594 | 0.07010 | 0.10865 | 0.15965 | 0.11480 | 0.13317 | 0.11991 | 0.12714 |
| P15864 | H12_MOUSE    | 0.00000 | 0.00000 | 0.00000 | 0.00000 | 0.00000 | 0.00000 | 0.10040 | 0.32003 | 0.21906 | 0.37256 | 0.20845 | 0.35520 |
| P16015 | CAH3_MOUSE   | 0.00074 | 0.00164 | 0.00236 | 0.00183 | 0.00073 | 0.00167 | 0.31018 | 0.01961 | 0.18612 | 0.03238 | 0.03476 | 0.02380 |
| P16045 | LEG1_MOUSE   | 0.01767 | 0.00689 | 0.01338 | 0.01571 | 0.01068 | 0.00764 | 0.04014 | 0.03126 | 0.02688 | 0.03809 | 0.01909 | 0.03581 |
| P16054 | KPCE_MOUSE   | 0.00000 | 0.00000 | 0.00000 | 0.00000 | 0.00000 | 0.00000 | 0.00000 | 0.00587 | 0.00681 | 0.00000 | 0.00819 | 0.00000 |
| P16110 | LEG3_MOUSE   | 0.00000 | 0.00000 | 0.00000 | 0.00000 | 0.00000 | 0.00000 | 0.03345 | 0.04898 | 0.07154 | 0.05938 | 0.03365 | 0.03905 |
| P16125 | LDHB_MOUSE   | 0.50311 | 0.75288 | 0.73569 | 0.48289 | 0.63698 | 0.88971 | 0.07978 | 0.10174 | 0.08040 | 0.07923 | 0.06269 | 0.07455 |
| P16254 | SRP14_MOUSE  | 0.00000 | 0.00000 | 0.00000 | 0.00000 | 0.00000 | 0.00000 | 0.00759 | 0.00201 | 0.00651 | 0.00521 | 0.00728 | 0.00742 |
| P16283 | B3A3_MOUSE   | 0.00000 | 0.00000 | 0.00000 | 0.00000 | 0.00000 | 0.00000 | 0.00000 | 0.00234 | 0.00259 | 0.00250 | 0.00138 | 0.00124 |
| P16330 | CN37_MOUSE   | 0.00000 | 0.00000 | 0.00000 | 0.00000 | 0.00000 | 0.00000 | 0.00000 | 0.00566 | 0.00776 | 0.00000 | 0.00518 | 0.00208 |
| P16331 | PH4H_MOUSE   | 0.00000 | 0.00000 | 0.00000 | 0.00000 | 0.00000 | 0.00000 | 0.00000 | 0.00022 | 0.00019 | 0.00000 | 0.00000 | 0.00000 |
| P16332 | MUTA_MOUSE   | 0.03269 | 0.02449 | 0.02476 | 0.02240 | 0.02706 | 0.03114 | 0.00751 | 0.01381 | 0.00908 | 0.00955 | 0.00707 | 0.00846 |
| P16406 | AMPE_MOUSE   | 0.00000 | 0.00000 | 0.00000 | 0.00000 | 0.00000 | 0.00000 | 0.04307 | 0.05017 | 0.05095 | 0.04872 | 0.05356 | 0.05727 |
| P16460 | ASSY_MOUSE   | 0.00000 | 0.00000 | 0.00000 | 0.00000 | 0.00000 | 0.00000 | 0.00062 | 0.00570 | 0.00600 | 0.00357 | 0.00699 | 0.00446 |
| P16546 | SPTN1_MOUSE  | 0.20417 | 0.12728 | 0.17457 | 0.17758 | 0.15946 | 0.13867 | 0.11687 | 0.13151 | 0.17854 | 0.14207 | 0.15623 | 0.15012 |
| P16675 | PPGB_MOUSE   | 0.00000 | 0.00000 | 0.00000 | 0.00000 | 0.00000 | 0.00000 | 0.00320 | 0.01266 | 0.01088 | 0.00897 | 0.01087 | 0.00757 |
| P16858 | G3P_MOUSE    | 0.98224 | 0.51869 | 1.01981 | 0.72860 | 0.78858 | 0.80090 | 0.56288 | 0.36825 | 0.26070 | 0.35137 | 0.25157 | 0.36877 |
| P17047 | LAMP2_MOUSE  | 0.00000 | 0.00000 | 0.00000 | 0.00000 | 0.00000 | 0.00000 | 0.01423 | 0.00880 | 0.01141 | 0.01020 | 0.00962 | 0.00916 |
| P17095 | HMG1A1_MOUSE | 0.00000 | 0.00000 | 0.00000 | 0.00000 | 0.00000 | 0.00000 | 0.00000 | 0.00475 | 0.01254 | 0.00321 | 0.00524 | 0.00382 |
| P17156 | HSP72_MOUSE  | 0.00174 | 0.00159 | 0.00116 | 0.00169 | 0.00127 | 0.00206 | 0.00928 | 0.02057 | 0.01681 | 0.01947 | 0.01767 | 0.02012 |
| P17182 | ENOA_MOUSE   | 0.01978 | 0.01074 | 0.02291 | 0.01871 | 0.01169 | 0.01796 | 0.24492 | 0.22841 | 0.25146 | 0.22383 | 0.14674 | 0.24705 |
| P17225 | PTBP1_MOUSE  | 0.00000 | 0.00000 | 0.00000 | 0.00000 | 0.00000 | 0.00000 | 0.02836 | 0.02911 | 0.03491 | 0.03486 | 0.05349 | 0.05020 |
| P17426 | AP2A1_MOUSE  | 0.00318 | 0.00278 | 0.00247 | 0.00558 | 0.00239 | 0.00226 | 0.02605 | 0.01886 | 0.02001 | 0.01972 | 0.02271 | 0.02178 |
| P17427 | AP2A2_MOUSE  | 0.00246 | 0.00341 | 0.00061 | 0.00193 | 0.00128 | 0.00240 | 0.02469 | 0.02629 | 0.02828 | 0.02327 | 0.02374 | 0.03292 |

|        |             |         |         |         |         |         |         |         |         |         |         |         |         |
|--------|-------------|---------|---------|---------|---------|---------|---------|---------|---------|---------|---------|---------|---------|
| P17563 | SBP1_MOUSE  | 0.17766 | 0.18321 | 0.14017 | 0.12865 | 0.14143 | 0.19348 | 0.49841 | 0.60360 | 0.41273 | 0.42781 | 0.51318 | 0.55056 |
| P17710 | HXK1_MOUSE  | 0.01418 | 0.02208 | 0.01823 | 0.02075 | 0.01743 | 0.02101 | 0.02334 | 0.02683 | 0.01946 | 0.02161 | 0.02164 | 0.02025 |
| P17717 | UDB17_MOUSE | 0.00000 | 0.00000 | 0.00000 | 0.00000 | 0.00000 | 0.00000 | 0.00000 | 0.00000 | 0.00000 | 0.00000 | 0.00000 | 0.00000 |
| P17742 | PPIA_MOUSE  | 0.02645 | 0.02491 | 0.03541 | 0.02842 | 0.02695 | 0.03856 | 0.35395 | 0.35896 | 0.25657 | 0.31834 | 0.23481 | 0.37145 |
| P17751 | TPIS_MOUSE  | 0.10177 | 0.21466 | 0.27082 | 0.26688 | 0.23720 | 0.29151 | 0.08246 | 0.08808 | 0.09662 | 0.09369 | 0.07877 | 0.08996 |
| P17809 | GTR1_MOUSE  | 0.00000 | 0.00000 | 0.00000 | 0.00000 | 0.00000 | 0.00000 | 0.00052 | 0.00059 | 0.00164 | 0.00044 | 0.00125 | 0.00086 |
| Q61696 | HS71A_MOUSE | 0.00347 | 0.00298 | 0.00224 | 0.00348 | 0.00148 | 0.00239 | 0.02606 | 0.03407 | 0.02715 | 0.01684 | 0.01333 | 0.02009 |
| P17918 | PCNA_MOUSE  | 0.00000 | 0.00000 | 0.00000 | 0.00000 | 0.00000 | 0.00000 | 0.00670 | 0.01020 | 0.00417 | 0.00628 | 0.00179 | 0.01073 |
| P18052 | PTPRA_MOUSE | 0.00000 | 0.00000 | 0.00000 | 0.00000 | 0.00000 | 0.00000 | 0.00254 | 0.00149 | 0.00289 | 0.00000 | 0.00093 | 0.00497 |
| P18242 | CATD_MOUSE  | 0.02036 | 0.02472 | 0.02485 | 0.02895 | 0.04263 | 0.02615 | 0.04137 | 0.03269 | 0.04375 | 0.04387 | 0.02799 | 0.03262 |
| P18419 | SVS4_MOUSE  | 0.00000 | 0.00013 | 0.00084 | 0.11426 | 0.00000 | 0.00000 | 0.00000 | 0.00000 | 0.00000 | 0.00000 | 0.00000 | 0.00000 |
| P18525 | HVM54_MOUSE | 0.00000 | 0.00000 | 0.00000 | 0.00000 | 0.00000 | 0.00000 | 0.00000 | 0.00453 | 0.00000 | 0.00000 | 0.00000 | 0.00000 |
| P18572 | BASI_MOUSE  | 0.07178 | 0.06416 | 0.05445 | 0.07686 | 0.04433 | 0.06950 | 0.00673 | 0.00559 | 0.01061 | 0.01137 | 0.00976 | 0.00631 |
| P18608 | HMG1_MOUSE  | 0.00000 | 0.00000 | 0.00000 | 0.00000 | 0.00000 | 0.00000 | 0.00000 | 0.00413 | 0.00041 | 0.00294 | 0.00000 | 0.00101 |
| P18653 | KS6A1_MOUSE | 0.00000 | 0.00000 | 0.00000 | 0.00000 | 0.00000 | 0.00000 | 0.01667 | 0.01235 | 0.02001 | 0.01454 | 0.02621 | 0.01799 |
| P18654 | KS6A3_MOUSE | 0.00000 | 0.00000 | 0.00000 | 0.00000 | 0.00000 | 0.00000 | 0.00235 | 0.00443 | 0.00645 | 0.00519 | 0.00805 | 0.00629 |
| P18760 | COF1_MOUSE  | 0.00000 | 0.00000 | 0.00000 | 0.00000 | 0.00000 | 0.00000 | 0.31805 | 0.34702 | 0.32620 | 0.42269 | 0.37688 | 0.46048 |
| P18828 | SDC1_MOUSE  | 0.00000 | 0.00000 | 0.00000 | 0.00000 | 0.00000 | 0.00000 | 0.00000 | 0.01238 | 0.01296 | 0.00661 | 0.00853 | 0.01095 |
| P18872 | GNAO_MOUSE  | 0.00000 | 0.00000 | 0.00000 | 0.00000 | 0.00000 | 0.00000 | 0.03070 | 0.04407 | 0.03707 | 0.03211 | 0.01791 | 0.03416 |
| P18894 | OXDA_MOUSE  | 0.00000 | 0.00000 | 0.00000 | 0.00000 | 0.00000 | 0.00000 | 0.00000 | 0.00000 | 0.00000 | 0.00000 | 0.00000 | 0.00000 |
| P19096 | FAS_MOUSE   | 0.00000 | 0.00000 | 0.00000 | 0.00000 | 0.00000 | 0.00000 | 0.12149 | 0.05183 | 0.11041 | 0.06197 | 0.05541 | 0.04909 |
| P19123 | TNNC1_MOUSE | 0.46473 | 0.43925 | 0.42772 | 0.53134 | 0.54139 | 0.53629 | 0.01384 | 0.02509 | 0.02645 | 0.02725 | 0.01647 | 0.01428 |
| P19137 | LAMA1_MOUSE | 0.00000 | 0.00000 | 0.00000 | 0.00000 | 0.00000 | 0.00000 | 0.00000 | 0.03273 | 0.01226 | 0.01446 | 0.00000 | 0.01045 |
| P19157 | GSTP1_MOUSE | 0.16160 | 0.14319 | 0.09580 | 0.10885 | 0.13759 | 0.13195 | 0.21922 | 0.26440 | 0.22580 | 0.25647 | 0.21155 | 0.26371 |
| P19221 | THRB_MOUSE  | 0.00666 | 0.00576 | 0.00361 | 0.00726 | 0.00592 | 0.00501 | 0.00882 | 0.00823 | 0.00822 | 0.01421 | 0.01059 | 0.00554 |
| P19246 | NFH_MOUSE   | 0.00000 | 0.00000 | 0.00000 | 0.00000 | 0.00000 | 0.00000 | 0.00000 | 0.00000 | 0.00329 | 0.00000 | 0.00000 | 0.00000 |
| P19253 | RL13A_MOUSE | 0.00000 | 0.00000 | 0.00000 | 0.00000 | 0.00000 | 0.00000 | 0.00306 | 0.01883 | 0.03040 | 0.03481 | 0.01557 | 0.02150 |
| P19258 | MPV17_MOUSE | 0.00000 | 0.00000 | 0.00000 | 0.00000 | 0.00000 | 0.00000 | 0.00000 | 0.00080 | 0.00000 | 0.00000 | 0.00000 | 0.00000 |
| P19324 | SERPH_MOUSE | 0.03483 | 0.01711 | 0.01694 | 0.01912 | 0.02465 | 0.02080 | 0.08644 | 0.06084 | 0.09407 | 0.07985 | 0.08933 | 0.06661 |
| P19536 | COX5B_MOUSE | 0.00164 | 0.00049 | 0.00210 | 0.00353 | 0.00151 | 0.00103 | 0.00000 | 0.00937 | 0.00974 | 0.01718 | 0.00000 | 0.00000 |
| P19783 | COX41_MOUSE | 0.21569 | 0.12661 | 0.17647 | 0.21269 | 0.24208 | 0.25605 | 0.08387 | 0.09390 | 0.06280 | 0.07141 | 0.05957 | 0.04965 |
| P19788 | MGP_MOUSE   | 0.00000 | 0.00000 | 0.00000 | 0.00000 | 0.00000 | 0.00000 | 0.00000 | 0.00263 | 0.00000 | 0.00000 | 0.00527 | 0.00000 |
| P19973 | LSP1_MOUSE  | 0.00000 | 0.00000 | 0.00000 | 0.00000 | 0.00000 | 0.00000 | 0.00468 | 0.02054 | 0.02593 | 0.02255 | 0.01582 | 0.02195 |
| P20029 | BIP_MOUSE   | 0.18281 | 0.16560 | 0.25088 | 0.16474 | 0.16070 | 0.14036 | 0.29006 | 0.28239 | 0.29490 | 0.31842 | 0.25533 | 0.30356 |





|        |             |         |         |         |         |         |         |         |         |         |         |         |         |
|--------|-------------|---------|---------|---------|---------|---------|---------|---------|---------|---------|---------|---------|---------|
| P23927 | CRYAB_MOUSE | 0.08168 | 0.04543 | 0.11459 | 0.07551 | 0.08825 | 0.07971 | 0.05556 | 0.02493 | 0.03039 | 0.02696 | 0.02354 | 0.02073 |
| P23953 | EST1C_MOUSE | 0.00463 | 0.00138 | 0.00424 | 0.00716 | 0.00416 | 0.00070 | 0.03960 | 0.02356 | 0.05734 | 0.06859 | 0.09419 | 0.03737 |
| P24063 | ITAL_MOUSE  | 0.00000 | 0.00000 | 0.00000 | 0.00000 | 0.00000 | 0.00000 | 0.00300 | 0.00181 | 0.00284 | 0.00381 | 0.00428 | 0.00424 |
| P24270 | CATA_MOUSE  | 0.03717 | 0.03177 | 0.02836 | 0.03174 | 0.03806 | 0.03208 | 0.04273 | 0.04614 | 0.04601 | 0.05111 | 0.06912 | 0.04754 |
| P24369 | PPIB_MOUSE  | 0.00000 | 0.00000 | 0.00000 | 0.00000 | 0.00000 | 0.00000 | 0.04071 | 0.05696 | 0.03960 | 0.04153 | 0.03078 | 0.03764 |
| P24452 | CAPG_MOUSE  | 0.00000 | 0.00000 | 0.00000 | 0.00000 | 0.00000 | 0.00000 | 0.04681 | 0.05755 | 0.04648 | 0.05317 | 0.03877 | 0.05656 |
| P24457 | CP2DB_MOUSE | 0.00000 | 0.00000 | 0.00000 | 0.00000 | 0.00000 | 0.00000 | 0.00000 | 0.00412 | 0.00493 | 0.00412 | 0.00190 | 0.00291 |
| P24472 | GSTA4_MOUSE | 0.00000 | 0.00000 | 0.00000 | 0.00000 | 0.00000 | 0.00000 | 0.04662 | 0.06395 | 0.02822 | 0.03728 | 0.03290 | 0.04189 |
| P24527 | LKHA4_MOUSE | 0.00756 | 0.01682 | 0.01044 | 0.01558 | 0.01332 | 0.01370 | 0.03539 | 0.05028 | 0.03850 | 0.03884 | 0.04492 | 0.04197 |
| P24547 | IMDH2_MOUSE | 0.00000 | 0.00000 | 0.00000 | 0.00000 | 0.00000 | 0.00000 | 0.00099 | 0.00244 | 0.00483 | 0.00400 | 0.00526 | 0.00312 |
| P24549 | AL1A1_MOUSE | 0.01534 | 0.01253 | 0.01200 | 0.01560 | 0.01300 | 0.01292 | 0.66832 | 0.67443 | 0.59202 | 0.59767 | 0.70120 | 0.70525 |
| P24668 | MPRD_MOUSE  | 0.00000 | 0.00000 | 0.00000 | 0.00000 | 0.00000 | 0.00000 | 0.02581 | 0.04824 | 0.03687 | 0.03607 | 0.03483 | 0.04037 |
| P25444 | RS2_MOUSE   | 0.00276 | 0.00268 | 0.00467 | 0.00315 | 0.00368 | 0.00199 | 0.05930 | 0.03413 | 0.04910 | 0.03898 | 0.05313 | 0.04439 |
| P25799 | NFKB1_MOUSE | 0.00000 | 0.00000 | 0.00000 | 0.00000 | 0.00000 | 0.00000 | 0.00170 | 0.00669 | 0.00566 | 0.00467 | 0.00233 | 0.00812 |
| P25911 | LYN_MOUSE   | 0.00000 | 0.00000 | 0.00000 | 0.00000 | 0.00000 | 0.00000 | 0.01201 | 0.01956 | 0.02669 | 0.02055 | 0.02937 | 0.02495 |
| P25976 | UBF1_MOUSE  | 0.00000 | 0.00000 | 0.00000 | 0.00000 | 0.00000 | 0.00000 | 0.00432 | 0.00780 | 0.00527 | 0.00716 | 0.00915 | 0.00840 |
| P26039 | TLN1_MOUSE  | 0.04784 | 0.03395 | 0.03073 | 0.03332 | 0.03441 | 0.02729 | 0.15940 | 0.18207 | 0.19424 | 0.18819 | 0.19518 | 0.20866 |
| P26040 | EZRI_MOUSE  | 0.00863 | 0.00695 | 0.00706 | 0.00608 | 0.00753 | 0.01212 | 0.05446 | 0.05784 | 0.07594 | 0.06366 | 0.06233 | 0.06050 |
| P26041 | MOES_MOUSE  | 0.01403 | 0.02307 | 0.01429 | 0.01630 | 0.01462 | 0.01838 | 0.76841 | 1.07445 | 1.07622 | 0.99350 | 0.81226 | 1.03251 |
| P26043 | RADI_MOUSE  | 0.00764 | 0.00910 | 0.01197 | 0.01364 | 0.00825 | 0.01113 | 0.05224 | 0.04855 | 0.05514 | 0.05325 | 0.06083 | 0.05174 |
| P26149 | 3BHS2_MOUSE | 0.00000 | 0.00000 | 0.00000 | 0.00000 | 0.00000 | 0.00000 | 0.00000 | 0.00000 | 0.00000 | 0.00000 | 0.00000 | 0.00000 |
| P26231 | CTNA1_MOUSE | 0.02972 | 0.01571 | 0.01906 | 0.01952 | 0.02248 | 0.02580 | 0.05240 | 0.05041 | 0.04993 | 0.04931 | 0.05159 | 0.05986 |
| P26350 | PTMA_MOUSE  | 0.00000 | 0.00000 | 0.00000 | 0.00000 | 0.00000 | 0.00000 | 0.02487 | 0.16977 | 0.22412 | 0.20072 | 0.12254 | 0.11048 |
| P26369 | U2AF2_MOUSE | 0.00000 | 0.00000 | 0.00000 | 0.00000 | 0.00000 | 0.00000 | 0.02395 | 0.01689 | 0.02182 | 0.02012 | 0.01981 | 0.02444 |
| P26443 | DHE3_MOUSE  | 0.07483 | 0.06493 | 0.07993 | 0.06166 | 0.06104 | 0.03990 | 0.04571 | 0.04630 | 0.03783 | 0.04359 | 0.03637 | 0.04424 |
| P26516 | PSMD7_MOUSE | 0.00000 | 0.00000 | 0.00000 | 0.00000 | 0.00000 | 0.00000 | 0.00313 | 0.00424 | 0.00904 | 0.00696 | 0.01276 | 0.00391 |
| P26618 | PGFRA_MOUSE | 0.00000 | 0.00000 | 0.00000 | 0.00000 | 0.00000 | 0.00000 | 0.00000 | 0.00000 | 0.00000 | 0.00000 | 0.00000 | 0.00000 |
| P26638 | SYSC_MOUSE  | 0.00229 | 0.00110 | 0.00119 | 0.00086 | 0.00078 | 0.00011 | 0.02703 | 0.01738 | 0.02938 | 0.02354 | 0.02504 | 0.02528 |
| P26645 | MARCS_MOUSE | 0.00000 | 0.00000 | 0.00000 | 0.00000 | 0.00000 | 0.00000 | 0.00051 | 0.04576 | 0.08356 | 0.06627 | 0.04332 | 0.04046 |
| P26883 | FKB1A_MOUSE | 0.00034 | 0.00016 | 0.00020 | 0.00028 | 0.00019 | 0.00000 | 0.00699 | 0.04640 | 0.01682 | 0.04345 | 0.00620 | 0.02417 |
| P27005 | S10A8_MOUSE | 0.00000 | 0.00000 | 0.00000 | 0.00000 | 0.00000 | 0.00000 | 0.02467 | 0.01190 | 0.00890 | 0.00995 | 0.02381 | 0.01227 |
| P27046 | MA2A1_MOUSE | 0.00000 | 0.00000 | 0.00000 | 0.00000 | 0.00000 | 0.00000 | 0.00462 | 0.00583 | 0.00591 | 0.00457 | 0.00339 | 0.00386 |
| P27048 | RSMB_MOUSE  | 0.00000 | 0.00000 | 0.00000 | 0.00000 | 0.00000 | 0.00000 | 0.00278 | 0.01270 | 0.00548 | 0.00697 | 0.00890 | 0.00473 |
| P27546 | MAP4_MOUSE  | 0.00998 | 0.01238 | 0.01057 | 0.01099 | 0.01500 | 0.01227 | 0.05623 | 0.04913 | 0.05603 | 0.05333 | 0.05542 | 0.06258 |

|        |             |         |         |         |         |         |         |         |         |         |         |         |         |
|--------|-------------|---------|---------|---------|---------|---------|---------|---------|---------|---------|---------|---------|---------|
| P27573 | MYPO_MOUSE  | 0.00000 | 0.00000 | 0.00000 | 0.00000 | 0.00000 | 0.00000 | 0.05023 | 0.01307 | 0.07501 | 0.01043 | 0.02097 | 0.00715 |
| P27601 | GNA13_MOUSE | 0.00000 | 0.00000 | 0.00000 | 0.00000 | 0.00000 | 0.00000 | 0.00846 | 0.01971 | 0.02578 | 0.01697 | 0.01962 | 0.02661 |
| P27612 | PLAP_MOUSE  | 0.00154 | 0.00247 | 0.00095 | 0.00204 | 0.00127 | 0.00157 | 0.00510 | 0.00955 | 0.00813 | 0.00985 | 0.00998 | 0.00844 |
| P27659 | RL3_MOUSE   | 0.00000 | 0.00000 | 0.00000 | 0.00000 | 0.00000 | 0.00000 | 0.03096 | 0.03233 | 0.04460 | 0.03885 | 0.04194 | 0.04510 |
| P27773 | PDIA3_MOUSE | 0.00633 | 0.01329 | 0.01096 | 0.01745 | 0.01080 | 0.01348 | 0.25878 | 0.32206 | 0.33497 | 0.32230 | 0.24599 | 0.31416 |
| P28063 | PSB8_MOUSE  | 0.00000 | 0.00000 | 0.00000 | 0.00000 | 0.00000 | 0.00000 | 0.00841 | 0.01471 | 0.01689 | 0.00987 | 0.00377 | 0.01079 |
| P28076 | PSB9_MOUSE  | 0.00000 | 0.00000 | 0.00000 | 0.00000 | 0.00000 | 0.00000 | 0.00214 | 0.00354 | 0.00629 | 0.00575 | 0.00891 | 0.00531 |
| P28271 | ACOC_MOUSE  | 0.00621 | 0.00440 | 0.00861 | 0.00379 | 0.00351 | 0.00405 | 0.00698 | 0.01011 | 0.01139 | 0.00832 | 0.01142 | 0.01088 |
| P28301 | LYOX_MOUSE  | 0.00000 | 0.00000 | 0.00000 | 0.00000 | 0.00000 | 0.00000 | 0.01146 | 0.00709 | 0.00852 | 0.00377 | 0.01698 | 0.01093 |
| P28352 | APEX1_MOUSE | 0.00145 | 0.00244 | 0.00232 | 0.00217 | 0.00202 | 0.00141 | 0.00103 | 0.00915 | 0.01931 | 0.01311 | 0.01637 | 0.00951 |
| P28474 | ADHX_MOUSE  | 0.03089 | 0.03018 | 0.01705 | 0.02379 | 0.02672 | 0.03885 | 0.03090 | 0.02573 | 0.03930 | 0.03003 | 0.04168 | 0.03353 |
| P28481 | CO2A1_MOUSE | 0.00000 | 0.00000 | 0.00000 | 0.00000 | 0.00000 | 0.00000 | 0.00000 | 0.00000 | 0.00080 | 0.00000 | 0.00236 | 0.00000 |
| P28650 | PURA1_MOUSE | 0.02796 | 0.01821 | 0.01678 | 0.02100 | 0.01845 | 0.01197 | 0.01907 | 0.00465 | 0.00406 | 0.00527 | 0.00187 | 0.00242 |
| P28651 | CAH8_MOUSE  | 0.00000 | 0.00000 | 0.00000 | 0.00000 | 0.00000 | 0.00000 | 0.01166 | 0.01248 | 0.00712 | 0.00998 | 0.01081 | 0.01327 |
| P28653 | PGS1_MOUSE  | 0.00000 | 0.00000 | 0.00000 | 0.00000 | 0.00000 | 0.00000 | 0.39199 | 0.16756 | 0.21600 | 0.11315 | 0.35490 | 0.28315 |
| P28654 | PGS2_MOUSE  | 0.00000 | 0.00000 | 0.00000 | 0.00000 | 0.00000 | 0.00000 | 0.08152 | 0.04432 | 0.06057 | 0.02735 | 0.08016 | 0.04484 |
| P28656 | NP1L1_MOUSE | 0.00000 | 0.00000 | 0.00000 | 0.00000 | 0.00000 | 0.00000 | 0.05407 | 0.03847 | 0.05684 | 0.05188 | 0.06963 | 0.06915 |
| P28658 | ATX10_MOUSE | 0.00000 | 0.00000 | 0.00000 | 0.00000 | 0.00000 | 0.00000 | 0.01462 | 0.01329 | 0.01578 | 0.01334 | 0.01526 | 0.01341 |
| P28659 | CELF1_MOUSE | 0.00000 | 0.00000 | 0.00000 | 0.00000 | 0.00000 | 0.00000 | 0.00038 | 0.00038 | 0.00056 | 0.00034 | 0.00000 | 0.00012 |
| P28660 | NCKP1_MOUSE | 0.00000 | 0.00000 | 0.00000 | 0.00000 | 0.00000 | 0.00000 | 0.00777 | 0.01120 | 0.01225 | 0.00981 | 0.01381 | 0.01230 |
| P28661 | SEPT4_MOUSE | 0.00000 | 0.00000 | 0.00000 | 0.00000 | 0.00000 | 0.00000 | 0.01164 | 0.01910 | 0.01581 | 0.01498 | 0.01429 | 0.01403 |
| P28665 | MUG1_MOUSE  | 0.05564 | 0.02403 | 0.02810 | 0.04265 | 0.03047 | 0.02354 | 0.02828 | 0.02071 | 0.01591 | 0.02519 | 0.03510 | 0.00844 |
| P28667 | MRP_MOUSE   | 0.00000 | 0.00000 | 0.00000 | 0.00000 | 0.00000 | 0.00000 | 0.00000 | 0.00000 | 0.00416 | 0.00267 | 0.00000 | 0.00113 |
| P28740 | KIF2A_MOUSE | 0.00000 | 0.00000 | 0.00000 | 0.00000 | 0.00000 | 0.00000 | 0.00000 | 0.00092 | 0.00188 | 0.00242 | 0.00348 | 0.00428 |
| P28825 | MEP1A_MOUSE | 0.00000 | 0.00000 | 0.00000 | 0.00000 | 0.00000 | 0.00000 | 0.00037 | 0.00039 | 0.00052 | 0.00044 | 0.00036 | 0.00034 |
| P28828 | PTPRM_MOUSE | 0.00000 | 0.00000 | 0.00000 | 0.00000 | 0.00000 | 0.00000 | 0.00213 | 0.00637 | 0.01161 | 0.01337 | 0.01309 | 0.00559 |
| P28843 | DPP4_MOUSE  | 0.00000 | 0.00000 | 0.00000 | 0.00000 | 0.00000 | 0.00000 | 0.03104 | 0.03716 | 0.04636 | 0.04218 | 0.03943 | 0.03987 |
| P28867 | KPCD_MOUSE  | 0.00000 | 0.00000 | 0.00000 | 0.00000 | 0.00000 | 0.00000 | 0.00447 | 0.00402 | 0.00340 | 0.00489 | 0.00253 | 0.00684 |
| P29341 | PABP1_MOUSE | 0.00572 | 0.00353 | 0.00363 | 0.00223 | 0.00331 | 0.00456 | 0.03161 | 0.03767 | 0.02849 | 0.02790 | 0.02725 | 0.03533 |
| P29351 | PTN6_MOUSE  | 0.00000 | 0.00000 | 0.00000 | 0.00000 | 0.00000 | 0.00000 | 0.01267 | 0.01377 | 0.01751 | 0.01386 | 0.02136 | 0.01895 |
| P29391 | FRIL1_MOUSE | 0.00000 | 0.00000 | 0.00000 | 0.00000 | 0.00000 | 0.00000 | 0.01001 | 0.01205 | 0.02011 | 0.02062 | 0.02577 | 0.01356 |
| P29416 | HEXA_MOUSE  | 0.00000 | 0.00000 | 0.00000 | 0.00000 | 0.00000 | 0.00000 | 0.00000 | 0.00929 | 0.00251 | 0.00268 | 0.00262 | 0.00486 |
| P29452 | CASP1_MOUSE | 0.00000 | 0.00000 | 0.00000 | 0.00000 | 0.00000 | 0.00000 | 0.00059 | 0.00044 | 0.00179 | 0.00078 | 0.00177 | 0.00122 |
| P29533 | VCAM1_MOUSE | 0.00000 | 0.00000 | 0.00000 | 0.00000 | 0.00000 | 0.00000 | 0.00590 | 0.00542 | 0.00495 | 0.00579 | 0.00000 | 0.00687 |

|        |             |         |         |         |         |         |         |         |         |         |         |         |         |
|--------|-------------|---------|---------|---------|---------|---------|---------|---------|---------|---------|---------|---------|---------|
| P29595 | NEDD8_MOUSE | 0.00000 | 0.00000 | 0.00000 | 0.00000 | 0.00000 | 0.00000 | 0.02120 | 0.01557 | 0.02383 | 0.02346 | 0.01582 | 0.01128 |
| P29699 | FETUA_MOUSE | 0.03400 | 0.02695 | 0.02189 | 0.04288 | 0.02716 | 0.01511 | 0.06440 | 0.03653 | 0.09718 | 0.06672 | 0.10983 | 0.03770 |
| P29758 | OAT_MOUSE   | 0.03869 | 0.03142 | 0.15613 | 0.10486 | 0.14288 | 0.12512 | 0.04312 | 0.06282 | 0.07706 | 0.05803 | 0.08315 | 0.06137 |
| P29788 | VTNC_MOUSE  | 0.00000 | 0.00000 | 0.00000 | 0.00000 | 0.00000 | 0.00000 | 0.00889 | 0.00703 | 0.01708 | 0.01011 | 0.00649 | 0.01141 |
| P30115 | GSTA3_MOUSE | 0.00000 | 0.00000 | 0.00000 | 0.00000 | 0.00020 | 0.00000 | 0.10352 | 0.14936 | 0.14658 | 0.11229 | 0.10607 | 0.18506 |
| P30275 | KCRU_MOUSE  | 0.00000 | 0.00000 | 0.00000 | 0.00000 | 0.00000 | 0.00000 | 0.02905 | 0.01724 | 0.02033 | 0.01968 | 0.02227 | 0.01506 |
| P30412 | PPIC_MOUSE  | 0.00000 | 0.00000 | 0.00000 | 0.00000 | 0.00000 | 0.00000 | 0.00209 | 0.00934 | 0.00129 | 0.00285 | 0.00059 | 0.00384 |
| P30416 | FKBP4_MOUSE | 0.00000 | 0.00000 | 0.00000 | 0.00000 | 0.00000 | 0.00000 | 0.01107 | 0.01345 | 0.01232 | 0.01001 | 0.01252 | 0.01026 |
| P30677 | GNA14_MOUSE | 0.00000 | 0.00000 | 0.00000 | 0.00000 | 0.00000 | 0.00000 | 0.00000 | 0.00357 | 0.00659 | 0.00113 | 0.00149 | 0.00188 |
| P30681 | HMGB2_MOUSE | 0.00000 | 0.00000 | 0.00000 | 0.00000 | 0.00000 | 0.00000 | 0.00160 | 0.01715 | 0.02251 | 0.02589 | 0.01780 | 0.02112 |
| P30999 | CTND1_MOUSE | 0.00000 | 0.00000 | 0.00000 | 0.00000 | 0.00000 | 0.00000 | 0.01927 | 0.03506 | 0.03224 | 0.02951 | 0.03539 | 0.03580 |
| P31001 | DESM_MOUSE  | 0.63848 | 0.56920 | 0.67731 | 0.56855 | 0.74781 | 0.78817 | 0.11950 | 0.12028 | 0.09168 | 0.11060 | 0.09671 | 0.09743 |
| P31230 | AIMP1_MOUSE | 0.00000 | 0.00000 | 0.00000 | 0.00000 | 0.00000 | 0.00000 | 0.00445 | 0.00554 | 0.00562 | 0.00626 | 0.00576 | 0.00524 |
| P31324 | KAP3_MOUSE  | 0.00000 | 0.00000 | 0.00000 | 0.00000 | 0.00000 | 0.00000 | 0.00456 | 0.00382 | 0.00465 | 0.00124 | 0.00308 | 0.00000 |
| P31428 | DPEP1_MOUSE | 0.00000 | 0.00000 | 0.00000 | 0.00000 | 0.00000 | 0.00000 | 0.06812 | 0.07551 | 0.10654 | 0.07024 | 0.08013 | 0.09744 |
| P31532 | SAA4_MOUSE  | 0.00000 | 0.00000 | 0.00000 | 0.00000 | 0.00000 | 0.00000 | 0.00540 | 0.00606 | 0.00314 | 0.00196 | 0.00296 | 0.00150 |
| P31650 | S6A11_MOUSE | 0.00000 | 0.00000 | 0.00000 | 0.00000 | 0.00000 | 0.00000 | 0.00000 | 0.00019 | 0.00000 | 0.00000 | 0.00000 | 0.00000 |
| P31725 | S10A9_MOUSE | 0.00000 | 0.00000 | 0.00000 | 0.00000 | 0.00000 | 0.00000 | 0.03381 | 0.08760 | 0.02150 | 0.05076 | 0.05472 | 0.13015 |
| P31750 | AKT1_MOUSE  | 0.00000 | 0.00000 | 0.00000 | 0.00000 | 0.00000 | 0.00000 | 0.00490 | 0.00289 | 0.00741 | 0.00628 | 0.00656 | 0.00632 |
| P31786 | ACBP_MOUSE  | 0.00000 | 0.00000 | 0.00000 | 0.00000 | 0.00000 | 0.00000 | 0.01992 | 0.00759 | 0.01582 | 0.01379 | 0.01075 | 0.00836 |
| P31809 | CEAM1_MOUSE | 0.00123 | 0.00288 | 0.00232 | 0.00181 | 0.00177 | 0.00207 | 0.00000 | 0.00906 | 0.00492 | 0.00696 | 0.00642 | 0.00499 |
| P31938 | MP2K1_MOUSE | 0.00000 | 0.00000 | 0.00000 | 0.00000 | 0.00000 | 0.00000 | 0.00405 | 0.00246 | 0.01063 | 0.00468 | 0.00580 | 0.00753 |
| P32020 | NLTP_MOUSE  | 0.00000 | 0.00000 | 0.00000 | 0.00000 | 0.00000 | 0.00000 | 0.00256 | 0.01721 | 0.02349 | 0.01790 | 0.00516 | 0.01716 |
| P32067 | LA_MOUSE    | 0.00000 | 0.00000 | 0.00000 | 0.00000 | 0.00000 | 0.00000 | 0.02013 | 0.01750 | 0.01910 | 0.02056 | 0.02444 | 0.02290 |
| P32233 | DRG1_MOUSE  | 0.00000 | 0.00000 | 0.00000 | 0.00000 | 0.00000 | 0.00000 | 0.00816 | 0.00636 | 0.00670 | 0.00702 | 0.00864 | 0.00689 |
| P32261 | ANT3_MOUSE  | 0.03272 | 0.02792 | 0.03200 | 0.03171 | 0.04935 | 0.02685 | 0.04331 | 0.04074 | 0.05810 | 0.05177 | 0.05783 | 0.05157 |
| P32883 | RASK_MOUSE  | 0.00000 | 0.00000 | 0.00000 | 0.00000 | 0.00000 | 0.00000 | 0.00000 | 0.00306 | 0.00490 | 0.00292 | 0.00148 | 0.00135 |
| P32921 | SYWC_MOUSE  | 0.01172 | 0.01146 | 0.01333 | 0.00839 | 0.00850 | 0.00915 | 0.06009 | 0.05956 | 0.04491 | 0.04747 | 0.04745 | 0.05712 |
| P33267 | CP2F2_MOUSE | 0.00000 | 0.00000 | 0.00000 | 0.00000 | 0.00000 | 0.00000 | 0.26066 | 0.25906 | 0.13750 | 0.12262 | 0.25837 | 0.16917 |
| P33434 | MMP2_MOUSE  | 0.00000 | 0.00000 | 0.00000 | 0.00000 | 0.00000 | 0.00000 | 0.00850 | 0.00155 | 0.00764 | 0.00471 | 0.00676 | 0.00604 |
| P33622 | APOC3_MOUSE | 0.00000 | 0.00000 | 0.00000 | 0.00000 | 0.00000 | 0.00000 | 0.01576 | 0.00521 | 0.00337 | 0.02459 | 0.00998 | 0.00000 |
| P34022 | RANG_MOUSE  | 0.00000 | 0.00000 | 0.00000 | 0.00000 | 0.00000 | 0.00000 | 0.01045 | 0.02181 | 0.01372 | 0.01058 | 0.01111 | 0.02090 |
| P34152 | FAK1_MOUSE  | 0.00000 | 0.00000 | 0.00000 | 0.00000 | 0.00000 | 0.00000 | 0.00943 | 0.00872 | 0.00696 | 0.00713 | 0.00654 | 0.01114 |
| P34884 | MIF_MOUSE   | 0.00000 | 0.00000 | 0.00000 | 0.00000 | 0.00000 | 0.00000 | 0.01887 | 0.02404 | 0.02016 | 0.02246 | 0.02113 | 0.02626 |

|        |             |         |         |         |         |         |         |         |         |         |         |         |         |
|--------|-------------|---------|---------|---------|---------|---------|---------|---------|---------|---------|---------|---------|---------|
| P34914 | HYES_MOUSE  | 0.10000 | 0.11005 | 0.12226 | 0.08561 | 0.11288 | 0.11213 | 0.00380 | 0.00336 | 0.00285 | 0.00268 | 0.00330 | 0.00280 |
| P34928 | APOC1_MOUSE | 0.00000 | 0.00000 | 0.00000 | 0.00000 | 0.00000 | 0.00000 | 0.00057 | 0.00000 | 0.00000 | 0.00117 | 0.00000 | 0.00000 |
| P35123 | UBP4_MOUSE  | 0.00000 | 0.00000 | 0.00000 | 0.00000 | 0.00000 | 0.00000 | 0.00000 | 0.00000 | 0.00071 | 0.00252 | 0.00228 | 0.00204 |
| P35235 | PTN11_MOUSE | 0.00768 | 0.00810 | 0.00919 | 0.00826 | 0.00881 | 0.00637 | 0.01326 | 0.00812 | 0.01186 | 0.00995 | 0.01122 | 0.00940 |
| P35242 | SFTPA_MOUSE | 0.00000 | 0.00000 | 0.00000 | 0.00000 | 0.00000 | 0.00000 | 0.21995 | 0.32692 | 0.24661 | 0.29302 | 0.22357 | 0.28494 |
| P35276 | RAB3D_MOUSE | 0.00000 | 0.00000 | 0.00000 | 0.00000 | 0.00000 | 0.00000 | 0.00000 | 0.00143 | 0.00000 | 0.00192 | 0.00000 | 0.00180 |
| P35278 | RAB5C_MOUSE | 0.00000 | 0.00000 | 0.00000 | 0.00000 | 0.00000 | 0.00000 | 0.02273 | 0.05293 | 0.04968 | 0.04828 | 0.04899 | 0.05957 |
| P35279 | RAB6A_MOUSE | 0.00000 | 0.00000 | 0.00000 | 0.00000 | 0.00000 | 0.00000 | 0.06525 | 0.18188 | 0.09463 | 0.13356 | 0.06303 | 0.12892 |
| P35282 | RAB21_MOUSE | 0.00931 | 0.00445 | 0.00697 | 0.00430 | 0.00349 | 0.00189 | 0.01684 | 0.01599 | 0.01809 | 0.01484 | 0.01290 | 0.01437 |
| P35283 | RAB12_MOUSE | 0.00000 | 0.00000 | 0.00000 | 0.00000 | 0.00000 | 0.00000 | 0.02316 | 0.02018 | 0.01211 | 0.01530 | 0.01831 | 0.01864 |
| P35285 | RB22A_MOUSE | 0.00000 | 0.00000 | 0.00000 | 0.00000 | 0.00000 | 0.00000 | 0.01253 | 0.01291 | 0.01624 | 0.01011 | 0.01079 | 0.01056 |
| P35288 | RAB23_MOUSE | 0.00000 | 0.00000 | 0.00000 | 0.00000 | 0.00000 | 0.00000 | 0.01088 | 0.00000 | 0.00990 | 0.00000 | 0.00591 | 0.00349 |
| P35293 | RAB18_MOUSE | 0.01812 | 0.01735 | 0.01340 | 0.00845 | 0.01118 | 0.01148 | 0.02113 | 0.02037 | 0.02186 | 0.02785 | 0.01380 | 0.02382 |
| P35330 | ICAM2_MOUSE | 0.00000 | 0.00000 | 0.00000 | 0.00000 | 0.00000 | 0.00000 | 0.00924 | 0.01819 | 0.01376 | 0.01327 | 0.01005 | 0.01658 |
| P35486 | ODPA_MOUSE  | 0.12164 | 0.12812 | 0.15869 | 0.11753 | 0.15767 | 0.17654 | 0.07059 | 0.06002 | 0.04765 | 0.04878 | 0.03229 | 0.05319 |
| P35505 | FAAA_MOUSE  | 0.00000 | 0.00000 | 0.00000 | 0.00000 | 0.00000 | 0.00000 | 0.00126 | 0.00346 | 0.00354 | 0.00319 | 0.00094 | 0.00152 |
| P35550 | FBRL_MOUSE  | 0.00000 | 0.00000 | 0.00000 | 0.00000 | 0.00000 | 0.00000 | 0.00172 | 0.00395 | 0.00881 | 0.00774 | 0.00717 | 0.00433 |
| P35564 | CALX_MOUSE  | 0.01620 | 0.02324 | 0.02975 | 0.02678 | 0.03281 | 0.01913 | 0.09358 | 0.10412 | 0.12850 | 0.12461 | 0.10667 | 0.11366 |
| P35576 | G6PC_MOUSE  | 0.00000 | 0.00000 | 0.00000 | 0.00000 | 0.00000 | 0.00000 | 0.00000 | 0.00000 | 0.00000 | 0.00146 | 0.00000 | 0.00000 |
| P35585 | AP1M1_MOUSE | 0.00000 | 0.00000 | 0.00000 | 0.00000 | 0.00000 | 0.00000 | 0.02673 | 0.01777 | 0.03125 | 0.02672 | 0.02721 | 0.03799 |
| P35700 | PRDX1_MOUSE | 0.03657 | 0.01567 | 0.03842 | 0.01707 | 0.03083 | 0.03526 | 0.07235 | 0.12183 | 0.06101 | 0.07224 | 0.07084 | 0.07012 |
| P35762 | CD81_MOUSE  | 0.00000 | 0.00000 | 0.00000 | 0.00000 | 0.00000 | 0.00000 | 0.04981 | 0.03018 | 0.03872 | 0.03865 | 0.04771 | 0.05273 |
| P35802 | GPM6A_MOUSE | 0.00000 | 0.00000 | 0.00000 | 0.00000 | 0.00000 | 0.00000 | 0.00000 | 0.00214 | 0.00503 | 0.00248 | 0.00133 | 0.00131 |
| P35803 | GPM6B_MOUSE | 0.00000 | 0.00000 | 0.00000 | 0.00000 | 0.00000 | 0.00000 | 0.00408 | 0.00545 | 0.00438 | 0.00183 | 0.00082 | 0.00682 |
| P35821 | PTN1_MOUSE  | 0.00000 | 0.00000 | 0.00000 | 0.00000 | 0.00000 | 0.00000 | 0.00102 | 0.00739 | 0.00543 | 0.00474 | 0.00442 | 0.00455 |
| P35822 | PTPRK_MOUSE | 0.00000 | 0.00000 | 0.00000 | 0.00000 | 0.00000 | 0.00000 | 0.00000 | 0.00000 | 0.00000 | 0.00000 | 0.00000 | 0.00000 |
| P35831 | PTN12_MOUSE | 0.00000 | 0.00000 | 0.00000 | 0.00000 | 0.00000 | 0.00000 | 0.00000 | 0.00000 | 0.00856 | 0.00317 | 0.00176 | 0.00014 |
| P35922 | FMR1_MOUSE  | 0.00000 | 0.00000 | 0.00000 | 0.00000 | 0.00000 | 0.00000 | 0.00000 | 0.00037 | 0.00146 | 0.00000 | 0.00052 | 0.00000 |
| P35979 | RL12_MOUSE  | 0.01819 | 0.01438 | 0.02097 | 0.01686 | 0.01585 | 0.01170 | 0.04386 | 0.02794 | 0.03194 | 0.03343 | 0.03554 | 0.03135 |
| P35980 | RL18_MOUSE  | 0.00000 | 0.00000 | 0.00000 | 0.00000 | 0.00000 | 0.00000 | 0.08745 | 0.08429 | 0.07767 | 0.09368 | 0.08461 | 0.08789 |
| P36371 | TAP2_MOUSE  | 0.00000 | 0.00000 | 0.00000 | 0.00000 | 0.00000 | 0.00000 | 0.00330 | 0.00383 | 0.00994 | 0.00478 | 0.00320 | 0.00524 |
| P36536 | SAR1A_MOUSE | 0.00000 | 0.00000 | 0.00000 | 0.00000 | 0.00000 | 0.00000 | 0.00000 | 0.00000 | 0.00330 | 0.00169 | 0.00041 | 0.00000 |
| P36552 | HEM6_MOUSE  | 0.00313 | 0.00157 | 0.00147 | 0.00182 | 0.00175 | 0.00152 | 0.00089 | 0.00058 | 0.00110 | 0.00118 | 0.00067 | 0.00074 |
| P36916 | GNL1_MOUSE  | 0.00000 | 0.00000 | 0.00000 | 0.00000 | 0.00000 | 0.00000 | 0.00000 | 0.00121 | 0.00195 | 0.00033 | 0.00057 | 0.00080 |



|        |             |         |         |         |         |         |         |         |         |         |         |         |         |
|--------|-------------|---------|---------|---------|---------|---------|---------|---------|---------|---------|---------|---------|---------|
| P36993 | PPM1B_MOUSE | 0.00000 | 0.00000 | 0.00000 | 0.00000 | 0.00000 | 0.00000 | 0.01539 | 0.01119 | 0.01635 | 0.01380 | 0.01287 | 0.01509 |
| P37040 | NCPR_MOUSE  | 0.00118 | 0.00085 | 0.00115 | 0.00065 | 0.00139 | 0.00060 | 0.12028 | 0.12116 | 0.08204 | 0.07997 | 0.09291 | 0.10752 |
| P37804 | TAGL_MOUSE  | 0.00410 | 0.00158 | 0.00255 | 0.00515 | 0.00186 | 0.00700 | 0.08137 | 0.08260 | 0.06724 | 0.07323 | 0.04917 | 0.06632 |
| P38060 | HMGCL_MOUSE | 0.00372 | 0.00275 | 0.00490 | 0.00577 | 0.00487 | 0.00578 | 0.00089 | 0.00009 | 0.00053 | 0.00030 | 0.00050 | 0.00027 |
| P38647 | GRP75_MOUSE | 0.25964 | 0.18378 | 0.18954 | 0.21227 | 0.22564 | 0.20098 | 0.05036 | 0.05102 | 0.04955 | 0.04835 | 0.03672 | 0.05580 |
| P39054 | DYN2_MOUSE  | 0.00235 | 0.01325 | 0.00214 | 0.00219 | 0.00230 | 0.00223 | 0.03909 | 0.02915 | 0.03680 | 0.03383 | 0.03751 | 0.03540 |
| P39061 | COIA1_MOUSE | 0.00000 | 0.00000 | 0.00000 | 0.00000 | 0.00000 | 0.00000 | 0.02751 | 0.03064 | 0.03579 | 0.02386 | 0.04264 | 0.03274 |
| P39447 | ZO1_MOUSE   | 0.00165 | 0.00240 | 0.00078 | 0.00130 | 0.00080 | 0.00135 | 0.04290 | 0.06341 | 0.07684 | 0.06604 | 0.06567 | 0.07143 |
| P39654 | LOX15_MOUSE | 0.00000 | 0.00000 | 0.00000 | 0.00000 | 0.00000 | 0.00000 | 0.00051 | 0.00092 | 0.00264 | 0.00097 | 0.00571 | 0.00697 |
| P39655 | LOX12_MOUSE | 0.00000 | 0.00000 | 0.00000 | 0.00000 | 0.00000 | 0.00000 | 0.00276 | 0.00010 | 0.00566 | 0.00782 | 0.00232 | 0.00145 |
| P39688 | FYN_MOUSE   | 0.00000 | 0.00000 | 0.00000 | 0.00000 | 0.00000 | 0.00000 | 0.00128 | 0.00328 | 0.00129 | 0.00000 | 0.00000 | 0.00227 |
| P39749 | FEN1_MOUSE  | 0.00000 | 0.00000 | 0.00000 | 0.00000 | 0.00000 | 0.00000 | 0.00000 | 0.00000 | 0.00150 | 0.00000 | 0.00000 | 0.00000 |
| P39876 | TIMP3_MOUSE | 0.00000 | 0.00000 | 0.00000 | 0.00000 | 0.00000 | 0.00000 | 0.01051 | 0.00431 | 0.00843 | 0.00738 | 0.00886 | 0.00071 |
| P40124 | CAP1_MOUSE  | 0.00244 | 0.00167 | 0.00120 | 0.00210 | 0.00165 | 0.00055 | 0.14055 | 0.16198 | 0.14078 | 0.16501 | 0.15359 | 0.17053 |
| P40142 | TKT_MOUSE   | 0.00336 | 0.00315 | 0.00228 | 0.00195 | 0.00142 | 0.00278 | 0.21656 | 0.17030 | 0.22566 | 0.19087 | 0.21363 | 0.22414 |
| P40237 | CD82_MOUSE  | 0.00000 | 0.00000 | 0.00000 | 0.00000 | 0.00000 | 0.00000 | 0.01857 | 0.01400 | 0.01724 | 0.01203 | 0.00817 | 0.01571 |
| P40240 | CD9_MOUSE   | 0.00000 | 0.00000 | 0.00000 | 0.00000 | 0.00000 | 0.00000 | 0.00000 | 0.00362 | 0.00463 | 0.00328 | 0.00299 | 0.00154 |
| P40336 | VP26A_MOUSE | 0.00562 | 0.00884 | 0.01188 | 0.01043 | 0.00804 | 0.00834 | 0.01979 | 0.02126 | 0.02332 | 0.02136 | 0.02241 | 0.01900 |
| P40630 | TFAM_MOUSE  | 0.00217 | 0.00629 | 0.00260 | 0.00388 | 0.00266 | 0.00636 | 0.00166 | 0.00513 | 0.00000 | 0.00265 | 0.00428 | 0.01201 |
| P40936 | INMT_MOUSE  | 0.00000 | 0.00000 | 0.00000 | 0.00000 | 0.00000 | 0.00000 | 0.81196 | 1.33826 | 1.03710 | 1.15794 | 0.93674 | 1.16838 |
| P41105 | RL28_MOUSE  | 0.00000 | 0.00000 | 0.00000 | 0.00000 | 0.00000 | 0.00000 | 0.01350 | 0.01423 | 0.02400 | 0.02063 | 0.01694 | 0.01715 |
| P41216 | ACSL1_MOUSE | 0.21015 | 0.23075 | 0.13670 | 0.23645 | 0.21297 | 0.32924 | 0.03994 | 0.02497 | 0.02315 | 0.02070 | 0.01895 | 0.02242 |
| P41241 | CSK_MOUSE   | 0.00000 | 0.00000 | 0.00000 | 0.00000 | 0.00000 | 0.00000 | 0.00336 | 0.00158 | 0.00557 | 0.00450 | 0.00544 | 0.00432 |
| P41245 | MMP9_MOUSE  | 0.00000 | 0.00000 | 0.00000 | 0.00000 | 0.00000 | 0.00000 | 0.00209 | 0.00184 | 0.00262 | 0.00553 | 0.01422 | 0.01275 |
| P41317 | MBL2_MOUSE  | 0.00000 | 0.00000 | 0.00000 | 0.00000 | 0.00000 | 0.00000 | 0.00000 | 0.00078 | 0.00000 | 0.00089 | 0.00074 | 0.00000 |
| P41438 | S19A1_MOUSE | 0.00000 | 0.00000 | 0.00000 | 0.00000 | 0.00000 | 0.00000 | 0.00000 | 0.00000 | 0.00000 | 0.00000 | 0.00000 | 0.00000 |
| P41731 | CD63_MOUSE  | 0.00000 | 0.00000 | 0.00000 | 0.00000 | 0.00000 | 0.00000 | 0.00182 | 0.00268 | 0.00473 | 0.00553 | 0.00309 | 0.00781 |
| P42125 | ECI1_MOUSE  | 0.26257 | 0.28070 | 0.31733 | 0.19243 | 0.21783 | 0.17501 | 0.03757 | 0.04400 | 0.04104 | 0.03604 | 0.03056 | 0.03555 |
| P42208 | SEPT2_MOUSE | 0.01143 | 0.00789 | 0.01122 | 0.00731 | 0.01025 | 0.00856 | 0.03692 | 0.03891 | 0.05256 | 0.04473 | 0.04228 | 0.04262 |
| P42225 | STAT1_MOUSE | 0.00175 | 0.00082 | 0.00124 | 0.00100 | 0.00124 | 0.00082 | 0.04025 | 0.05365 | 0.04946 | 0.04886 | 0.03574 | 0.04451 |
| P42227 | STAT3_MOUSE | 0.03511 | 0.01954 | 0.06477 | 0.02209 | 0.02776 | 0.01551 | 0.01259 | 0.01174 | 0.02283 | 0.01393 | 0.01964 | 0.01624 |
| P42232 | STA5B_MOUSE | 0.00000 | 0.00000 | 0.00000 | 0.00000 | 0.00000 | 0.00000 | 0.00349 | 0.00264 | 0.01049 | 0.00542 | 0.00591 | 0.00391 |
| P42337 | PK3CA_MOUSE | 0.00000 | 0.00000 | 0.00000 | 0.00000 | 0.00000 | 0.00000 | 0.00000 | 0.00000 | 0.00000 | 0.00000 | 0.00000 | 0.00000 |
| P42567 | EPS15_MOUSE | 0.00000 | 0.00000 | 0.00000 | 0.00000 | 0.00000 | 0.00000 | 0.02085 | 0.02447 | 0.02833 | 0.02906 | 0.03441 | 0.03121 |

|        |             |         |         |         |         |         |         |         |         |         |         |         |         |
|--------|-------------|---------|---------|---------|---------|---------|---------|---------|---------|---------|---------|---------|---------|
| P42669 | PURA_MOUSE  | 0.00000 | 0.00000 | 0.00000 | 0.00000 | 0.00000 | 0.00000 | 0.06364 | 0.07048 | 0.07122 | 0.07038 | 0.06745 | 0.08967 |
| P42859 | HD_MOUSE    | 0.00000 | 0.00000 | 0.00000 | 0.00000 | 0.00000 | 0.00000 | 0.00000 | 0.00450 | 0.00068 | 0.00393 | 0.00000 | 0.00064 |
| P42932 | TCPQ_MOUSE  | 0.01336 | 0.00998 | 0.01591 | 0.01610 | 0.01467 | 0.01095 | 0.03209 | 0.03281 | 0.03069 | 0.03439 | 0.02092 | 0.03464 |
| P43023 | CX6A2_MOUSE | 0.00000 | 0.00000 | 0.00000 | 0.00000 | 0.00000 | 0.00000 | 0.01036 | 0.00294 | 0.00514 | 0.00562 | 0.00771 | 0.00166 |
| P43024 | CX6A1_MOUSE | 0.00000 | 0.00000 | 0.00000 | 0.00000 | 0.00000 | 0.00000 | 0.01947 | 0.01056 | 0.00873 | 0.00831 | 0.00972 | 0.00649 |
| P43025 | TETN_MOUSE  | 0.00000 | 0.00000 | 0.00000 | 0.00000 | 0.00000 | 0.00000 | 0.00000 | 0.00488 | 0.00000 | 0.00162 | 0.00000 | 0.00000 |
| P43274 | H14_MOUSE   | 0.00000 | 0.00000 | 0.00000 | 0.00000 | 0.00000 | 0.00000 | 0.25531 | 0.78846 | 0.41058 | 0.68237 | 0.30053 | 0.54180 |
| P43275 | H11_MOUSE   | 0.00000 | 0.00000 | 0.00000 | 0.00000 | 0.00000 | 0.00000 | 0.06560 | 0.05406 | 0.06829 | 0.09024 | 0.10680 | 0.09553 |
| P43276 | H15_MOUSE   | 0.00000 | 0.00000 | 0.00000 | 0.00000 | 0.00000 | 0.00000 | 0.01538 | 0.05499 | 0.04320 | 0.08929 | 0.02371 | 0.07088 |
| P43277 | H13_MOUSE   | 0.00000 | 0.00000 | 0.00000 | 0.00000 | 0.00000 | 0.00000 | 0.00000 | 0.15572 | 0.12645 | 0.08014 | 0.06623 | 0.07803 |
| P43406 | ITAV_MOUSE  | 0.00000 | 0.00000 | 0.00000 | 0.00000 | 0.00000 | 0.00000 | 0.00820 | 0.00986 | 0.01053 | 0.01045 | 0.00985 | 0.01287 |
| P45376 | ALDR_MOUSE  | 0.10942 | 0.07273 | 0.15139 | 0.09183 | 0.08863 | 0.09650 | 0.09662 | 0.08654 | 0.09867 | 0.09220 | 0.07260 | 0.09858 |
| P45377 | ALD2_MOUSE  | 0.00000 | 0.00000 | 0.00000 | 0.00000 | 0.00000 | 0.00000 | 0.00560 | 0.00588 | 0.01018 | 0.00979 | 0.00787 | 0.00806 |
| P45591 | COF2_MOUSE  | 0.00385 | 0.01287 | 0.02610 | 0.03103 | 0.03445 | 0.00328 | 0.08087 | 0.04771 | 0.07665 | 0.07041 | 0.07221 | 0.05872 |
| P45700 | MA1A1_MOUSE | 0.00000 | 0.00000 | 0.00000 | 0.00000 | 0.00000 | 0.00000 | 0.00000 | 0.00144 | 0.00000 | 0.00000 | 0.00120 | 0.00000 |
| P45878 | FKBP2_MOUSE | 0.00000 | 0.00000 | 0.00000 | 0.00000 | 0.00000 | 0.00000 | 0.00139 | 0.00689 | 0.00380 | 0.00421 | 0.00110 | 0.00403 |
| P45952 | ACADM_MOUSE | 0.36328 | 0.56406 | 0.38755 | 0.33069 | 0.50466 | 0.69638 | 0.05596 | 0.03878 | 0.03639 | 0.03000 | 0.02623 | 0.03003 |
| P46061 | RAGP1_MOUSE | 0.00000 | 0.00000 | 0.00000 | 0.00000 | 0.00000 | 0.00000 | 0.00488 | 0.00536 | 0.00728 | 0.00643 | 0.01008 | 0.00791 |
| P46062 | SIPA1_MOUSE | 0.00000 | 0.00000 | 0.00000 | 0.00000 | 0.00000 | 0.00000 | 0.00000 | 0.00156 | 0.00063 | 0.00114 | 0.00082 | 0.00038 |
| P46412 | GPX3_MOUSE  | 0.00000 | 0.00000 | 0.00000 | 0.00000 | 0.00000 | 0.00000 | 0.06132 | 0.03403 | 0.03693 | 0.03105 | 0.02422 | 0.03481 |
| P46414 | CDN1B_MOUSE | 0.00000 | 0.00000 | 0.00000 | 0.00000 | 0.00000 | 0.00000 | 0.00000 | 0.00237 | 0.00468 | 0.00377 | 0.00175 | 0.00225 |
| P46460 | NSF_MOUSE   | 0.00000 | 0.00000 | 0.00000 | 0.00000 | 0.00000 | 0.00000 | 0.01079 | 0.00992 | 0.01209 | 0.00971 | 0.00879 | 0.00854 |
| P46467 | VPS4B_MOUSE | 0.00000 | 0.00000 | 0.00000 | 0.00000 | 0.00000 | 0.00000 | 0.01042 | 0.01052 | 0.00973 | 0.01151 | 0.00825 | 0.00981 |
| P46471 | PRS7_MOUSE  | 0.00295 | 0.00794 | 0.00497 | 0.00443 | 0.00772 | 0.00598 | 0.01982 | 0.02948 | 0.02136 | 0.02588 | 0.01235 | 0.02652 |
| P46638 | RB11B_MOUSE | 0.00000 | 0.00000 | 0.00000 | 0.00000 | 0.00000 | 0.00000 | 0.05942 | 0.11037 | 0.07827 | 0.10551 | 0.07912 | 0.09904 |
| P46656 | ADX_MOUSE   | 0.00000 | 0.00000 | 0.00000 | 0.00000 | 0.00000 | 0.00000 | 0.00192 | 0.00675 | 0.00000 | 0.00584 | 0.00417 | 0.00325 |
| P46662 | MERL_MOUSE  | 0.00000 | 0.00000 | 0.00000 | 0.00000 | 0.00000 | 0.00000 | 0.00000 | 0.00000 | 0.00000 | 0.00000 | 0.00000 | 0.00000 |
| P46664 | PURA2_MOUSE | 0.00000 | 0.00000 | 0.00000 | 0.00000 | 0.00000 | 0.00000 | 0.02589 | 0.02818 | 0.04032 | 0.03129 | 0.04615 | 0.03480 |
| P46735 | MYO1B_MOUSE | 0.00158 | 0.00056 | 0.00078 | 0.00181 | 0.00160 | 0.00100 | 0.06792 | 0.06240 | 0.05871 | 0.05113 | 0.06949 | 0.06763 |
| P46737 | BRCC3_MOUSE | 0.00000 | 0.00000 | 0.00000 | 0.00000 | 0.00000 | 0.00000 | 0.00000 | 0.00297 | 0.00000 | 0.00000 | 0.00000 | 0.00212 |
| P46935 | NEDD4_MOUSE | 0.00457 | 0.00615 | 0.00502 | 0.00408 | 0.00567 | 0.00511 | 0.01426 | 0.01801 | 0.01525 | 0.01325 | 0.01520 | 0.01421 |
| P46938 | YAP1_MOUSE  | 0.00000 | 0.00000 | 0.00000 | 0.00000 | 0.00000 | 0.00000 | 0.00000 | 0.00344 | 0.00283 | 0.00212 | 0.00038 | 0.00117 |
| P46978 | STT3A_MOUSE | 0.00000 | 0.00000 | 0.00000 | 0.00000 | 0.00000 | 0.00000 | 0.01015 | 0.01107 | 0.01078 | 0.01142 | 0.01024 | 0.01015 |
| P47199 | QOR_MOUSE   | 0.00585 | 0.00641 | 0.00573 | 0.00412 | 0.00345 | 0.00587 | 0.00377 | 0.00495 | 0.00565 | 0.00257 | 0.00308 | 0.00593 |

|        |             |         |         |         |         |         |         |         |         |         |         |         |         |
|--------|-------------|---------|---------|---------|---------|---------|---------|---------|---------|---------|---------|---------|---------|
| P47226 | TES_MOUSE   | 0.00000 | 0.00000 | 0.00000 | 0.00000 | 0.00000 | 0.00000 | 0.00000 | 0.00378 | 0.00290 | 0.00377 | 0.00535 | 0.00532 |
| P47713 | PA24A_MOUSE | 0.00000 | 0.00000 | 0.00000 | 0.00000 | 0.00000 | 0.00000 | 0.00000 | 0.00000 | 0.00000 | 0.00000 | 0.00000 | 0.00000 |
| P47738 | ALDH2_MOUSE | 0.15309 | 0.16731 | 0.10028 | 0.13238 | 0.13400 | 0.19994 | 0.48262 | 0.60840 | 0.35242 | 0.44399 | 0.37830 | 0.53112 |
| P47739 | AL3A1_MOUSE | 0.00000 | 0.00000 | 0.00000 | 0.00000 | 0.00000 | 0.00000 | 0.01845 | 0.01662 | 0.01332 | 0.01353 | 0.01380 | 0.01696 |
| P47740 | AL3A2_MOUSE | 0.00000 | 0.00000 | 0.00000 | 0.00000 | 0.00000 | 0.00000 | 0.00821 | 0.01606 | 0.00790 | 0.00968 | 0.00890 | 0.01410 |
| P47753 | CAZA1_MOUSE | 0.00000 | 0.00000 | 0.00000 | 0.00000 | 0.00000 | 0.00000 | 0.02528 | 0.02352 | 0.03285 | 0.02876 | 0.03458 | 0.03137 |
| P47754 | CAZA2_MOUSE | 0.01840 | 0.01286 | 0.01831 | 0.01558 | 0.01220 | 0.01371 | 0.08240 | 0.08689 | 0.10174 | 0.09405 | 0.10422 | 0.11136 |
| P47757 | CAPZB_MOUSE | 0.01538 | 0.01222 | 0.01123 | 0.01332 | 0.01028 | 0.01272 | 0.02895 | 0.03548 | 0.02648 | 0.02902 | 0.02390 | 0.03463 |
| P47758 | SRPRB_MOUSE | 0.00379 | 0.00326 | 0.00405 | 0.00493 | 0.00260 | 0.00308 | 0.05068 | 0.01264 | 0.01687 | 0.01661 | 0.01799 | 0.02363 |
| P47791 | GSHR_MOUSE  | 0.00198 | 0.00263 | 0.00238 | 0.00310 | 0.00277 | 0.00205 | 0.01425 | 0.01469 | 0.01867 | 0.01571 | 0.02415 | 0.01759 |
| P47802 | MTX1_MOUSE  | 0.00421 | 0.00327 | 0.00499 | 0.00705 | 0.00416 | 0.00572 | 0.00000 | 0.00154 | 0.00533 | 0.00383 | 0.00322 | 0.00201 |
| P47809 | MP2K4_MOUSE | 0.00415 | 0.00455 | 0.00482 | 0.00280 | 0.00315 | 0.00478 | 0.00180 | 0.00083 | 0.00311 | 0.00348 | 0.00091 | 0.00294 |
| P47811 | MK14_MOUSE  | 0.00097 | 0.00126 | 0.00195 | 0.00097 | 0.00105 | 0.00112 | 0.00094 | 0.00300 | 0.00448 | 0.00374 | 0.00404 | 0.00382 |
| P47856 | GFPT1_MOUSE | 0.00000 | 0.00000 | 0.00000 | 0.00000 | 0.00000 | 0.00000 | 0.00659 | 0.00779 | 0.01206 | 0.00934 | 0.01375 | 0.00851 |
| P47857 | PFKAM_MOUSE | 0.17075 | 0.19663 | 0.22024 | 0.19535 | 0.18764 | 0.15939 | 0.03401 | 0.01152 | 0.01223 | 0.01203 | 0.01537 | 0.00913 |
| P47880 | IBP6_MOUSE  | 0.00000 | 0.00000 | 0.00000 | 0.00000 | 0.00000 | 0.00000 | 0.01342 | 0.00279 | 0.00226 | 0.00195 | 0.00285 | 0.00099 |
| P47911 | RL6_MOUSE   | 0.00401 | 0.00838 | 0.01371 | 0.00921 | 0.00758 | 0.00498 | 0.00058 | 0.01530 | 0.02501 | 0.02256 | 0.01518 | 0.01576 |
| P47915 | RL29_MOUSE  | 0.00000 | 0.00000 | 0.00000 | 0.00000 | 0.00000 | 0.00000 | 0.00000 | 0.01015 | 0.00930 | 0.01229 | 0.00135 | 0.00360 |
| P47934 | CACP_MOUSE  | 0.13852 | 0.20336 | 0.23661 | 0.18004 | 0.17872 | 0.13161 | 0.01221 | 0.00256 | 0.00654 | 0.00373 | 0.00420 | 0.00319 |
| P47941 | CRKL_MOUSE  | 0.00000 | 0.00000 | 0.00000 | 0.00000 | 0.00000 | 0.00000 | 0.00911 | 0.00698 | 0.01231 | 0.01229 | 0.01963 | 0.01021 |
| P47955 | RLA1_MOUSE  | 0.01279 | 0.00451 | 0.01614 | 0.00769 | 0.01074 | 0.00465 | 0.00712 | 0.00504 | 0.00000 | 0.00000 | 0.00739 | 0.00000 |
| P47962 | RL5_MOUSE   | 0.00521 | 0.00445 | 0.00266 | 0.00677 | 0.00288 | 0.00486 | 0.00120 | 0.02201 | 0.02612 | 0.02404 | 0.01498 | 0.01547 |
| P47963 | RL13_MOUSE  | 0.00000 | 0.00000 | 0.00000 | 0.00000 | 0.00000 | 0.00000 | 0.01399 | 0.03321 | 0.02381 | 0.03039 | 0.01642 | 0.02060 |
| P47964 | RL36_MOUSE  | 0.00000 | 0.00000 | 0.00000 | 0.00000 | 0.00000 | 0.00000 | 0.00000 | 0.00166 | 0.00599 | 0.00238 | 0.00000 | 0.00167 |
| P47968 | RPIA_MOUSE  | 0.00000 | 0.00000 | 0.00000 | 0.00000 | 0.00000 | 0.00000 | 0.00000 | 0.00000 | 0.00130 | 0.00113 | 0.00090 | 0.00058 |
| P48024 | EIF1_MOUSE  | 0.00000 | 0.00000 | 0.00000 | 0.00000 | 0.00000 | 0.00000 | 0.02381 | 0.01753 | 0.02578 | 0.01963 | 0.02259 | 0.01778 |
| P48025 | KSYK_MOUSE  | 0.00000 | 0.00000 | 0.00000 | 0.00000 | 0.00000 | 0.00000 | 0.00088 | 0.00338 | 0.00915 | 0.00437 | 0.00993 | 0.00747 |
| P48036 | ANXA5_MOUSE | 0.03878 | 0.04081 | 0.03976 | 0.03602 | 0.05071 | 0.04838 | 0.32279 | 0.34390 | 0.29553 | 0.32890 | 0.29536 | 0.35966 |
| P48193 | 41_MOUSE    | 0.00482 | 0.00587 | 0.00430 | 0.00578 | 0.00405 | 0.00565 | 0.00722 | 0.00711 | 0.01067 | 0.01358 | 0.01936 | 0.00640 |
| P48428 | TBCA_MOUSE  | 0.00000 | 0.00000 | 0.00000 | 0.00000 | 0.00000 | 0.00000 | 0.00105 | 0.00451 | 0.00643 | 0.00505 | 0.00661 | 0.00708 |
| P48678 | LMNA_MOUSE  | 0.04897 | 0.04898 | 0.04000 | 0.03126 | 0.04691 | 0.02581 | 0.11404 | 0.13304 | 0.15785 | 0.13272 | 0.11834 | 0.11967 |
| P48722 | HS74L_MOUSE | 0.00412 | 0.00569 | 0.00508 | 0.00513 | 0.00454 | 0.00555 | 0.01327 | 0.01200 | 0.01670 | 0.01521 | 0.01810 | 0.01672 |
| P48758 | CBR1_MOUSE  | 0.01258 | 0.00654 | 0.00997 | 0.00964 | 0.00836 | 0.01180 | 0.05296 | 0.04323 | 0.04175 | 0.04579 | 0.04961 | 0.05566 |
| P48771 | CX7A2_MOUSE | 0.00000 | 0.00000 | 0.00000 | 0.00000 | 0.00000 | 0.00000 | 0.00634 | 0.01171 | 0.00939 | 0.01002 | 0.00683 | 0.00808 |



|        |             |         |         |         |         |         |         |         |         |         |         |         |         |
|--------|-------------|---------|---------|---------|---------|---------|---------|---------|---------|---------|---------|---------|---------|
| P48774 | GSTM5_MOUSE | 0.00695 | 0.00602 | 0.00617 | 0.00504 | 0.00848 | 0.00735 | 0.00440 | 0.00769 | 0.00600 | 0.00518 | 0.00317 | 0.00587 |
| P48787 | TNNI3_MOUSE | 0.52029 | 0.22565 | 0.39852 | 0.39707 | 0.62714 | 0.06821 | 0.02231 | 0.05452 | 0.06682 | 0.07017 | 0.03977 | 0.03925 |
| P48962 | ADT1_MOUSE  | 0.69177 | 0.62660 | 0.51233 | 1.07681 | 0.40713 | 1.10237 | 0.17298 | 0.26800 | 0.09987 | 0.17164 | 0.13347 | 0.14348 |
| P49182 | HEP2_MOUSE  | 0.00000 | 0.00000 | 0.00000 | 0.00000 | 0.00000 | 0.00000 | 0.00126 | 0.00361 | 0.00635 | 0.00321 | 0.00173 | 0.00320 |
| P49222 | EPB42_MOUSE | 0.00000 | 0.00000 | 0.00000 | 0.00000 | 0.00000 | 0.00000 | 0.00070 | 0.00000 | 0.00000 | 0.00518 | 0.01704 | 0.00000 |
| P49290 | PERE_MOUSE  | 0.00000 | 0.00000 | 0.00000 | 0.00000 | 0.00000 | 0.00000 | 0.00738 | 0.00732 | 0.00697 | 0.00633 | 0.01696 | 0.02611 |
| P49312 | ROA1_MOUSE  | 0.00636 | 0.00985 | 0.00396 | 0.00851 | 0.00523 | 0.00813 | 0.05796 | 0.07821 | 0.05514 | 0.06411 | 0.06372 | 0.06939 |
| P49442 | INPP_MOUSE  | 0.00290 | 0.00394 | 0.00445 | 0.00352 | 0.00381 | 0.00319 | 0.00820 | 0.00562 | 0.00927 | 0.00889 | 0.01110 | 0.01075 |
| P49443 | PPM1A_MOUSE | 0.00000 | 0.00000 | 0.00000 | 0.00000 | 0.00000 | 0.00000 | 0.00252 | 0.00769 | 0.00494 | 0.00457 | 0.00298 | 0.00515 |
| P49446 | PTPRE_MOUSE | 0.00000 | 0.00000 | 0.00000 | 0.00000 | 0.00000 | 0.00000 | 0.00175 | 0.00205 | 0.00297 | 0.00280 | 0.00132 | 0.00244 |
| P49586 | PCY1A_MOUSE | 0.00203 | 0.00179 | 0.00190 | 0.00179 | 0.00083 | 0.00156 | 0.01155 | 0.01007 | 0.00985 | 0.00858 | 0.01035 | 0.00928 |
| P49615 | CDK5_MOUSE  | 0.00000 | 0.00000 | 0.00000 | 0.00000 | 0.00000 | 0.00000 | 0.00442 | 0.00153 | 0.00329 | 0.00199 | 0.00256 | 0.00197 |
| P49710 | HCLS1_MOUSE | 0.00000 | 0.00000 | 0.00000 | 0.00000 | 0.00000 | 0.00000 | 0.00904 | 0.00325 | 0.00882 | 0.00816 | 0.00440 | 0.00827 |
| P49722 | PSA2_MOUSE  | 0.00000 | 0.00000 | 0.00000 | 0.00000 | 0.00000 | 0.00000 | 0.02312 | 0.02652 | 0.03663 | 0.02693 | 0.03514 | 0.03034 |
| P49769 | PSN1_MOUSE  | 0.00000 | 0.00000 | 0.00000 | 0.00000 | 0.00000 | 0.00000 | 0.00000 | 0.00158 | 0.00000 | 0.00170 | 0.00000 | 0.00000 |
| P49813 | TMOD1_MOUSE | 0.03717 | 0.06976 | 0.03271 | 0.02996 | 0.05372 | 0.05051 | 0.01601 | 0.01421 | 0.01519 | 0.01406 | 0.01363 | 0.01550 |
| P49817 | CAV1_MOUSE  | 0.00000 | 0.00000 | 0.00000 | 0.00000 | 0.00000 | 0.00000 | 0.56397 | 0.52892 | 0.82931 | 0.60134 | 0.72309 | 0.70973 |
| P49935 | CATH_MOUSE  | 0.00000 | 0.00000 | 0.00000 | 0.00000 | 0.00000 | 0.00000 | 0.03104 | 0.03106 | 0.03284 | 0.03792 | 0.02126 | 0.03561 |
| P49962 | SRP09_MOUSE | 0.00000 | 0.00000 | 0.00000 | 0.00000 | 0.00000 | 0.00000 | 0.00218 | 0.00169 | 0.00251 | 0.00166 | 0.00000 | 0.00175 |
| P50096 | IMDH1_MOUSE | 0.00000 | 0.00000 | 0.00000 | 0.00000 | 0.00000 | 0.00000 | 0.00298 | 0.00466 | 0.00590 | 0.00603 | 0.00478 | 0.00508 |
| P50136 | ODBA_MOUSE  | 0.02455 | 0.01750 | 0.01561 | 0.01315 | 0.01786 | 0.02328 | 0.00080 | 0.00415 | 0.00277 | 0.00172 | 0.00315 | 0.00340 |
| P50171 | DHB8_MOUSE  | 0.01279 | 0.01080 | 0.00928 | 0.01310 | 0.01320 | 0.01622 | 0.00511 | 0.00909 | 0.00302 | 0.00025 | 0.00430 | 0.00358 |
| P50172 | DHI1_MOUSE  | 0.00000 | 0.00000 | 0.00000 | 0.00000 | 0.00000 | 0.00000 | 0.05076 | 0.06480 | 0.03712 | 0.04562 | 0.04954 | 0.05473 |
| P50247 | SAHH_MOUSE  | 0.00000 | 0.00000 | 0.00000 | 0.00000 | 0.00000 | 0.00000 | 0.02420 | 0.03056 | 0.04046 | 0.03396 | 0.03356 | 0.03321 |
| P50285 | FMO1_MOUSE  | 0.00000 | 0.00000 | 0.00000 | 0.00000 | 0.00000 | 0.00000 | 0.05062 | 0.06537 | 0.05296 | 0.05324 | 0.05118 | 0.06402 |
| P50295 | ARY2_MOUSE  | 0.00000 | 0.00000 | 0.00000 | 0.00000 | 0.00000 | 0.00000 | 0.01069 | 0.00645 | 0.01566 | 0.00904 | 0.00457 | 0.00145 |
| P50396 | GDIA_MOUSE  | 0.01318 | 0.01767 | 0.01152 | 0.00841 | 0.01724 | 0.01791 | 0.04655 | 0.05914 | 0.05378 | 0.05594 | 0.04740 | 0.06176 |
| P50404 | SFTPD_MOUSE | 0.00000 | 0.00000 | 0.00000 | 0.00000 | 0.00000 | 0.00000 | 0.00701 | 0.00731 | 0.01036 | 0.00735 | 0.01073 | 0.00915 |
| P50405 | PSPB_MOUSE  | 0.00000 | 0.00000 | 0.00000 | 0.00000 | 0.00000 | 0.00000 | 0.01149 | 0.02529 | 0.00732 | 0.00702 | 0.01224 | 0.00576 |
| P50427 | STS_MOUSE   | 0.00000 | 0.00000 | 0.00000 | 0.00000 | 0.00000 | 0.00000 | 0.00305 | 0.00211 | 0.00468 | 0.00381 | 0.00353 | 0.00162 |
| P50429 | ARSB_MOUSE  | 0.00000 | 0.00000 | 0.00000 | 0.00000 | 0.00000 | 0.00000 | 0.00000 | 0.00000 | 0.00036 | 0.00052 | 0.00029 | 0.00096 |
| P50431 | GLYC_MOUSE  | 0.00000 | 0.00000 | 0.00000 | 0.00000 | 0.00000 | 0.00000 | 0.00000 | 0.00000 | 0.00035 | 0.00000 | 0.00033 | 0.00032 |
| P50462 | CSRP3_MOUSE | 0.11166 | 0.06794 | 0.09697 | 0.09131 | 0.08785 | 0.05341 | 0.12536 | 0.04637 | 0.01833 | 0.04771 | 0.04061 | 0.02860 |
| P50516 | VATA_MOUSE  | 0.00279 | 0.00380 | 0.00130 | 0.00249 | 0.00190 | 0.00305 | 0.02647 | 0.02435 | 0.03021 | 0.02578 | 0.02878 | 0.02691 |

|        |             |         |         |         |         |         |         |         |         |         |         |         |         |
|--------|-------------|---------|---------|---------|---------|---------|---------|---------|---------|---------|---------|---------|---------|
| P50518 | VATE1_MOUSE | 0.00000 | 0.00000 | 0.00000 | 0.00000 | 0.00000 | 0.00000 | 0.01644 | 0.01469 | 0.01836 | 0.01034 | 0.01510 | 0.01505 |
| P50543 | S10AB_MOUSE | 0.00000 | 0.00000 | 0.00000 | 0.00000 | 0.00000 | 0.00000 | 0.15770 | 0.15524 | 0.14215 | 0.19473 | 0.10244 | 0.16721 |
| P50544 | ACADV_MOUSE | 0.44235 | 0.40293 | 0.30463 | 0.40452 | 0.42136 | 0.46196 | 0.06084 | 0.03126 | 0.03660 | 0.03275 | 0.02965 | 0.03496 |
| P50580 | PA2G4_MOUSE | 0.00000 | 0.00000 | 0.00000 | 0.00000 | 0.00000 | 0.00000 | 0.02610 | 0.02807 | 0.03090 | 0.03373 | 0.02696 | 0.02692 |
| P50637 | TSPO_MOUSE  | 0.00000 | 0.00000 | 0.00000 | 0.00000 | 0.00000 | 0.00000 | 0.00030 | 0.00371 | 0.00528 | 0.00120 | 0.00000 | 0.00243 |
| P50752 | TNNT2_MOUSE | 0.50786 | 0.76488 | 0.63959 | 0.59739 | 0.61015 | 0.74399 | 0.01993 | 0.01779 | 0.02788 | 0.03378 | 0.02864 | 0.01998 |
| P51125 | ICAL_MOUSE  | 0.00467 | 0.00650 | 0.00337 | 0.00214 | 0.00231 | 0.00245 | 0.02242 | 0.02830 | 0.02888 | 0.02613 | 0.02641 | 0.02796 |
| P51150 | RAB7A_MOUSE | 0.02553 | 0.02690 | 0.01524 | 0.02369 | 0.01869 | 0.03415 | 0.10081 | 0.14482 | 0.07700 | 0.11036 | 0.07774 | 0.11576 |
| P51174 | ACADL_MOUSE | 1.06530 | 1.00148 | 1.00286 | 0.73649 | 0.94492 | 1.08987 | 0.13037 | 0.11787 | 0.10064 | 0.10536 | 0.09856 | 0.10407 |
| P51410 | RL9_MOUSE   | 0.00000 | 0.00000 | 0.00000 | 0.00000 | 0.00000 | 0.00000 | 0.08405 | 0.06238 | 0.05467 | 0.04909 | 0.07209 | 0.04882 |
| P51432 | PLCB3_MOUSE | 0.00000 | 0.00000 | 0.00000 | 0.00000 | 0.00000 | 0.00000 | 0.01840 | 0.01683 | 0.02073 | 0.02124 | 0.02729 | 0.02422 |
| P51437 | CAMP_MOUSE  | 0.00000 | 0.00000 | 0.00000 | 0.00000 | 0.00000 | 0.00000 | 0.02913 | 0.04138 | 0.01687 | 0.03065 | 0.03335 | 0.05010 |
| P51637 | CAV3_MOUSE  | 0.00000 | 0.00000 | 0.00000 | 0.00000 | 0.00000 | 0.00000 | 0.00000 | 0.00161 | 0.00035 | 0.00068 | 0.00118 | 0.00000 |
| P51660 | DHB4_MOUSE  | 0.00429 | 0.00261 | 0.00458 | 0.00207 | 0.00179 | 0.00273 | 0.02241 | 0.01551 | 0.01853 | 0.01704 | 0.01648 | 0.01626 |
| P51661 | DHI2_MOUSE  | 0.00000 | 0.00000 | 0.00000 | 0.00000 | 0.00000 | 0.00000 | 0.00000 | 0.00000 | 0.00000 | 0.00000 | 0.00000 | 0.00000 |
| P51667 | MLRV_MOUSE  | 0.01755 | 0.01677 | 0.03279 | 0.04021 | 0.01845 | 0.03009 | 0.00846 | 0.00114 | 0.00000 | 0.00000 | 0.00000 | 0.00105 |
| P51807 | DYLT1_MOUSE | 0.00000 | 0.00000 | 0.00000 | 0.00000 | 0.00000 | 0.00000 | 0.01418 | 0.00612 | 0.00419 | 0.00211 | 0.00161 | 0.00123 |
| P51855 | GSHB_MOUSE  | 0.00141 | 0.00118 | 0.00170 | 0.00113 | 0.00182 | 0.00191 | 0.00968 | 0.01355 | 0.01178 | 0.01160 | 0.01662 | 0.01485 |
| P51859 | HDGF_MOUSE  | 0.00000 | 0.00000 | 0.00000 | 0.00000 | 0.00000 | 0.00000 | 0.02204 | 0.03044 | 0.03769 | 0.03095 | 0.03268 | 0.03304 |
| P51863 | VA0D1_MOUSE | 0.00000 | 0.00000 | 0.00000 | 0.00000 | 0.00000 | 0.00000 | 0.00317 | 0.00565 | 0.00276 | 0.00274 | 0.00116 | 0.00315 |
| P51881 | ADT2_MOUSE  | 0.07199 | 0.04605 | 0.04060 | 0.13941 | 0.05040 | 0.09725 | 0.04648 | 0.12219 | 0.04884 | 0.06265 | 0.03307 | 0.07068 |
| P51885 | LUM_MOUSE   | 0.00000 | 0.00000 | 0.00000 | 0.00000 | 0.00000 | 0.00000 | 0.41035 | 0.27292 | 0.30595 | 0.24506 | 0.28957 | 0.29874 |
| P51906 | EAA3_MOUSE  | 0.00000 | 0.00000 | 0.00000 | 0.00000 | 0.00000 | 0.00000 | 0.00000 | 0.00033 | 0.00033 | 0.00020 | 0.00036 | 0.00000 |
| P51912 | AAAT_MOUSE  | 0.00000 | 0.00000 | 0.00000 | 0.00000 | 0.00000 | 0.00000 | 0.01491 | 0.00781 | 0.01561 | 0.00844 | 0.01594 | 0.01202 |
| P52196 | THTR_MOUSE  | 0.00000 | 0.00000 | 0.00000 | 0.00000 | 0.00000 | 0.00000 | 0.04915 | 0.04622 | 0.04009 | 0.03696 | 0.05208 | 0.04747 |
| P52332 | JAK1_MOUSE  | 0.00000 | 0.00000 | 0.00000 | 0.00000 | 0.00000 | 0.00000 | 0.00000 | 0.00116 | 0.00454 | 0.00251 | 0.00223 | 0.00139 |
| P52430 | PON1_MOUSE  | 0.00489 | 0.00378 | 0.00786 | 0.00593 | 0.00218 | 0.00460 | 0.05749 | 0.09017 | 0.03711 | 0.06065 | 0.08862 | 0.08692 |
| P52479 | UBP10_MOUSE | 0.00000 | 0.00000 | 0.00000 | 0.00000 | 0.00000 | 0.00000 | 0.00000 | 0.00000 | 0.00000 | 0.00000 | 0.00000 | 0.00130 |
| P52480 | KPYM_MOUSE  | 0.43077 | 0.36746 | 0.45472 | 0.55320 | 0.45139 | 0.57538 | 0.29651 | 0.32512 | 0.29458 | 0.24150 | 0.25599 | 0.29490 |
| P52503 | NDUS6_MOUSE | 0.00000 | 0.00000 | 0.00000 | 0.00000 | 0.00000 | 0.00000 | 0.00000 | 0.00000 | 0.00000 | 0.00080 | 0.00000 | 0.00000 |
| P52624 | UPP1_MOUSE  | 0.00000 | 0.00000 | 0.00000 | 0.00000 | 0.00000 | 0.00000 | 0.00000 | 0.00238 | 0.00478 | 0.00345 | 0.00104 | 0.00142 |
| P52633 | STAT6_MOUSE | 0.00000 | 0.00000 | 0.00000 | 0.00000 | 0.00000 | 0.00000 | 0.00000 | 0.00110 | 0.00000 | 0.00018 | 0.00000 | 0.00031 |
| P52760 | RIDA_MOUSE  | 0.00000 | 0.00000 | 0.00000 | 0.00000 | 0.00000 | 0.00000 | 0.00909 | 0.00517 | 0.00988 | 0.00799 | 0.01184 | 0.00711 |
| P52795 | EFNB1_MOUSE | 0.00000 | 0.00000 | 0.00000 | 0.00000 | 0.00000 | 0.00000 | 0.00324 | 0.00325 | 0.00608 | 0.00377 | 0.00235 | 0.00596 |

|        |             |         |         |         |         |         |         |         |         |         |         |         |         |
|--------|-------------|---------|---------|---------|---------|---------|---------|---------|---------|---------|---------|---------|---------|
| P52800 | EFNB2_MOUSE | 0.00000 | 0.00000 | 0.00000 | 0.00000 | 0.00000 | 0.00000 | 0.00038 | 0.00158 | 0.00222 | 0.00149 | 0.00152 | 0.00161 |
| P52825 | CPT2_MOUSE  | 0.09979 | 0.11340 | 0.11236 | 0.08301 | 0.10937 | 0.07080 | 0.00972 | 0.00563 | 0.00689 | 0.00500 | 0.00419 | 0.00499 |
| P52840 | ST1A1_MOUSE | 0.00000 | 0.00000 | 0.00000 | 0.00000 | 0.00000 | 0.00000 | 0.00122 | 0.00545 | 0.00060 | 0.00260 | 0.00187 | 0.00252 |
| P52875 | TM165_MOUSE | 0.00000 | 0.00000 | 0.00000 | 0.00000 | 0.00000 | 0.00000 | 0.00000 | 0.00169 | 0.00223 | 0.00000 | 0.00102 | 0.00182 |
| P53026 | RL10A_MOUSE | 0.00253 | 0.00394 | 0.00233 | 0.00216 | 0.00264 | 0.00240 | 0.02770 | 0.02244 | 0.02700 | 0.02398 | 0.02668 | 0.02698 |
| P53395 | ODB2_MOUSE  | 0.01160 | 0.01131 | 0.01973 | 0.00793 | 0.01150 | 0.01153 | 0.00880 | 0.00546 | 0.00621 | 0.00394 | 0.00624 | 0.00674 |
| P53657 | KPYR_MOUSE  | 0.00000 | 0.00000 | 0.00000 | 0.00000 | 0.00000 | 0.00000 | 0.00000 | 0.00000 | 0.00000 | 0.00036 | 0.00252 | 0.00000 |
| P53702 | CCHL_MOUSE  | 0.00126 | 0.00057 | 0.00161 | 0.00103 | 0.00160 | 0.00052 | 0.00000 | 0.00114 | 0.00107 | 0.00049 | 0.00042 | 0.00033 |
| P53810 | PIPNA_MOUSE | 0.00262 | 0.00376 | 0.00268 | 0.00199 | 0.00259 | 0.00346 | 0.02637 | 0.03463 | 0.03712 | 0.03778 | 0.03592 | 0.03850 |
| P53811 | PIPNB_MOUSE | 0.00000 | 0.00000 | 0.00000 | 0.00000 | 0.00000 | 0.00000 | 0.00552 | 0.00384 | 0.00796 | 0.00649 | 0.00790 | 0.00493 |
| P53986 | MOT1_MOUSE  | 0.00000 | 0.00000 | 0.00000 | 0.00000 | 0.00000 | 0.00000 | 0.00882 | 0.00507 | 0.01071 | 0.00720 | 0.00563 | 0.00284 |
| P53994 | RAB2A_MOUSE | 0.01139 | 0.01496 | 0.01140 | 0.01389 | 0.01225 | 0.01573 | 0.03808 | 0.05024 | 0.04217 | 0.04430 | 0.04745 | 0.04945 |
| P54071 | IDHP_MOUSE  | 0.61458 | 0.87481 | 0.71396 | 0.59674 | 0.67474 | 0.67554 | 0.14892 | 0.11325 | 0.11064 | 0.10690 | 0.12865 | 0.12194 |
| P54116 | STOM_MOUSE  | 0.01807 | 0.02271 | 0.01344 | 0.00878 | 0.01840 | 0.01764 | 0.01247 | 0.02520 | 0.02154 | 0.02773 | 0.01771 | 0.01984 |
| P54227 | STMN1_MOUSE | 0.00000 | 0.00000 | 0.00000 | 0.00000 | 0.00000 | 0.00000 | 0.00950 | 0.00608 | 0.00207 | 0.00573 | 0.00144 | 0.00593 |
| P54310 | LIPS_MOUSE  | 0.00000 | 0.00000 | 0.00000 | 0.00000 | 0.00000 | 0.00000 | 0.01097 | 0.00379 | 0.00934 | 0.00000 | 0.00000 | 0.00087 |
| P54320 | ELN_MOUSE   | 0.00000 | 0.00000 | 0.00000 | 0.00000 | 0.00000 | 0.00000 | 0.45415 | 0.31290 | 0.33250 | 0.21603 | 0.37546 | 0.39840 |
| P54726 | RD23A_MOUSE | 0.00000 | 0.00000 | 0.00000 | 0.00000 | 0.00000 | 0.00000 | 0.00000 | 0.00126 | 0.00221 | 0.00308 | 0.00270 | 0.00100 |
| P54728 | RD23B_MOUSE | 0.00000 | 0.00000 | 0.00000 | 0.00000 | 0.00000 | 0.00000 | 0.00326 | 0.12470 | 0.32742 | 0.11251 | 0.05099 | 0.10429 |
| P54729 | NUB1_MOUSE  | 0.00000 | 0.00000 | 0.00000 | 0.00000 | 0.00000 | 0.00000 | 0.00000 | 0.00186 | 0.00511 | 0.00341 | 0.00238 | 0.00386 |
| P54731 | FAF1_MOUSE  | 0.00000 | 0.00000 | 0.00000 | 0.00000 | 0.00000 | 0.00000 | 0.00072 | 0.00241 | 0.00187 | 0.00000 | 0.00108 | 0.00409 |
| P54761 | EPHB4_MOUSE | 0.00000 | 0.00000 | 0.00000 | 0.00000 | 0.00000 | 0.00000 | 0.00828 | 0.00625 | 0.00812 | 0.00714 | 0.00615 | 0.01185 |
| P54775 | PRS6B_MOUSE | 0.00991 | 0.00770 | 0.00819 | 0.00864 | 0.00855 | 0.00711 | 0.02356 | 0.01791 | 0.03230 | 0.02270 | 0.03865 | 0.02373 |
| P54797 | TNG2_MOUSE  | 0.00000 | 0.00000 | 0.00000 | 0.00000 | 0.00000 | 0.00000 | 0.00000 | 0.00000 | 0.00000 | 0.00000 | 0.00069 | 0.00000 |
| P54822 | PUR8_MOUSE  | 0.00401 | 0.00537 | 0.00354 | 0.00339 | 0.00374 | 0.00327 | 0.01529 | 0.00840 | 0.01467 | 0.01213 | 0.01888 | 0.01162 |
| P54823 | DDX6_MOUSE  | 0.00167 | 0.00133 | 0.00038 | 0.00093 | 0.00075 | 0.00044 | 0.00855 | 0.00941 | 0.02013 | 0.01460 | 0.01674 | 0.01170 |
| P54869 | HMCS2_MOUSE | 0.00000 | 0.00000 | 0.00000 | 0.00000 | 0.00000 | 0.00000 | 0.00197 | 0.00159 | 0.00821 | 0.00581 | 0.00698 | 0.00457 |
| P54923 | ADPRH_MOUSE | 0.00000 | 0.00000 | 0.00000 | 0.00000 | 0.00000 | 0.00000 | 0.00000 | 0.00107 | 0.00263 | 0.00274 | 0.00569 | 0.00185 |
| P55012 | S12A2_MOUSE | 0.00000 | 0.00000 | 0.00000 | 0.00000 | 0.00000 | 0.00000 | 0.00025 | 0.00174 | 0.00303 | 0.00076 | 0.00000 | 0.00189 |
| P55014 | S12A1_MOUSE | 0.00000 | 0.00000 | 0.00000 | 0.00000 | 0.00000 | 0.00000 | 0.00000 | 0.00000 | 0.00000 | 0.00000 | 0.00000 | 0.00000 |
| P55065 | PLTP_MOUSE  | 0.00000 | 0.00000 | 0.00000 | 0.00000 | 0.00000 | 0.00000 | 0.00813 | 0.00667 | 0.01019 | 0.00913 | 0.01421 | 0.01085 |
| P55096 | ABCD3_MOUSE | 0.00323 | 0.00728 | 0.00408 | 0.00281 | 0.00522 | 0.00498 | 0.02152 | 0.02318 | 0.03027 | 0.02219 | 0.01468 | 0.01549 |
| P55194 | 3BP1_MOUSE  | 0.00000 | 0.00000 | 0.00000 | 0.00000 | 0.00000 | 0.00000 | 0.00449 | 0.00830 | 0.00722 | 0.00892 | 0.00577 | 0.01087 |
| P55258 | RAB8A_MOUSE | 0.00000 | 0.00000 | 0.00000 | 0.00000 | 0.00000 | 0.00000 | 0.00912 | 0.00818 | 0.01174 | 0.00947 | 0.00842 | 0.01167 |

|        |             |         |         |         |         |         |         |         |         |         |         |         |         |
|--------|-------------|---------|---------|---------|---------|---------|---------|---------|---------|---------|---------|---------|---------|
| P55264 | ADK_MOUSE   | 0.01002 | 0.01502 | 0.01859 | 0.02416 | 0.01697 | 0.00587 | 0.01658 | 0.03928 | 0.04802 | 0.02969 | 0.02645 | 0.02832 |
| P55284 | CADH5_MOUSE | 0.00446 | 0.00659 | 0.00585 | 0.02353 | 0.00440 | 0.00609 | 0.03501 | 0.05556 | 0.04970 | 0.04488 | 0.02152 | 0.05788 |
| P55288 | CAD11_MOUSE | 0.00000 | 0.00000 | 0.00000 | 0.00000 | 0.00000 | 0.00000 | 0.00085 | 0.00262 | 0.00488 | 0.00356 | 0.00170 | 0.00520 |
| P55302 | AMRP_MOUSE  | 0.00000 | 0.00000 | 0.00000 | 0.00000 | 0.00000 | 0.00000 | 0.00162 | 0.01204 | 0.01167 | 0.00804 | 0.00991 | 0.01183 |
| P55772 | ENTP1_MOUSE | 0.00000 | 0.00000 | 0.00000 | 0.00000 | 0.00000 | 0.00000 | 0.02959 | 0.04616 | 0.04025 | 0.03987 | 0.04450 | 0.04848 |
| P55937 | GOGA3_MOUSE | 0.00000 | 0.00000 | 0.00000 | 0.00000 | 0.00000 | 0.00000 | 0.00279 | 0.00903 | 0.01295 | 0.00999 | 0.01039 | 0.00671 |
| P56135 | ATPK_MOUSE  | 0.00000 | 0.00000 | 0.00000 | 0.00000 | 0.00000 | 0.00000 | 0.04283 | 0.02913 | 0.03402 | 0.02590 | 0.02486 | 0.02298 |
| P56212 | ARP19_MOUSE | 0.00000 | 0.00000 | 0.00000 | 0.00000 | 0.00000 | 0.00000 | 0.00017 | 0.00394 | 0.00495 | 0.00705 | 0.00790 | 0.00221 |
| P56376 | ACYP1_MOUSE | 0.00000 | 0.00000 | 0.00000 | 0.00000 | 0.00000 | 0.00000 | 0.00146 | 0.00391 | 0.00000 | 0.00000 | 0.00162 | 0.00207 |
| P56379 | ATP68_MOUSE | 0.00000 | 0.00000 | 0.00000 | 0.00000 | 0.00000 | 0.00000 | 0.00000 | 0.00757 | 0.00523 | 0.00703 | 0.00270 | 0.00445 |
| P56380 | AP4A_MOUSE  | 0.01173 | 0.00928 | 0.01375 | 0.01162 | 0.01146 | 0.01374 | 0.00211 | 0.00179 | 0.00195 | 0.00232 | 0.00000 | 0.00531 |
| P56389 | CDD_MOUSE   | 0.00000 | 0.00000 | 0.00000 | 0.00000 | 0.00000 | 0.00000 | 0.00014 | 0.00000 | 0.00000 | 0.00003 | 0.00013 | 0.00022 |
| P56392 | CX7A1_MOUSE | 0.00000 | 0.00000 | 0.00000 | 0.00000 | 0.00000 | 0.00000 | 0.01892 | 0.00730 | 0.00586 | 0.00858 | 0.00681 | 0.00458 |
| P56395 | CYB5_MOUSE  | 0.00000 | 0.00000 | 0.00000 | 0.00000 | 0.00000 | 0.00000 | 0.06229 | 0.09149 | 0.11009 | 0.09514 | 0.11971 | 0.07580 |
| P56399 | UBP5_MOUSE  | 0.03669 | 0.04161 | 0.04412 | 0.05508 | 0.05043 | 0.04515 | 0.03014 | 0.01932 | 0.03101 | 0.02917 | 0.03232 | 0.03105 |
| P56400 | GP1BB_MOUSE | 0.00000 | 0.00000 | 0.00000 | 0.00000 | 0.00000 | 0.00000 | 0.00000 | 0.00000 | 0.00000 | 0.00035 | 0.00000 | 0.00000 |
| P56480 | ATPB_MOUSE  | 4.31607 | 5.38821 | 5.33497 | 4.67573 | 5.36576 | 6.76124 | 0.24944 | 0.27108 | 0.24245 | 0.26470 | 0.25572 | 0.26115 |
| P56528 | CD38_MOUSE  | 0.00000 | 0.00000 | 0.00000 | 0.00000 | 0.00000 | 0.00000 | 0.01888 | 0.00915 | 0.02015 | 0.01124 | 0.02039 | 0.02040 |
| P56546 | CTBP2_MOUSE | 0.00000 | 0.00000 | 0.00000 | 0.00000 | 0.00000 | 0.00000 | 0.00439 | 0.00303 | 0.00523 | 0.00390 | 0.00521 | 0.00339 |
| P56565 | S10A1_MOUSE | 0.00000 | 0.00000 | 0.00000 | 0.00000 | 0.00000 | 0.00000 | 0.00000 | 0.00000 | 0.00000 | 0.01796 | 0.00000 | 0.00000 |
| P56695 | WFS1_MOUSE  | 0.00000 | 0.00000 | 0.00000 | 0.00000 | 0.00000 | 0.00000 | 0.00000 | 0.00881 | 0.00721 | 0.00325 | 0.00665 | 0.00187 |
| P56812 | PDCD5_MOUSE | 0.00000 | 0.00000 | 0.00000 | 0.00000 | 0.00000 | 0.00000 | 0.00466 | 0.00429 | 0.00365 | 0.00642 | 0.00462 | 0.00476 |
| P56857 | CLD18_MOUSE | 0.00000 | 0.00000 | 0.00000 | 0.00000 | 0.00000 | 0.00000 | 0.00003 | 0.01924 | 0.02263 | 0.01673 | 0.01245 | 0.00900 |
| P56959 | FUS_MOUSE   | 0.00000 | 0.00000 | 0.00000 | 0.00000 | 0.00000 | 0.00000 | 0.01177 | 0.02332 | 0.03104 | 0.02739 | 0.02273 | 0.02232 |
| P57016 | LAD1_MOUSE  | 0.00000 | 0.00000 | 0.00000 | 0.00000 | 0.00000 | 0.00000 | 0.00000 | 0.00000 | 0.00000 | 0.00000 | 0.00000 | 0.00000 |
| P57716 | NICA_MOUSE  | 0.00000 | 0.00000 | 0.00000 | 0.00000 | 0.00000 | 0.00000 | 0.00114 | 0.00471 | 0.00917 | 0.00549 | 0.01391 | 0.01161 |
| P57746 | VATD_MOUSE  | 0.00000 | 0.00000 | 0.00000 | 0.00000 | 0.00000 | 0.00000 | 0.00362 | 0.00763 | 0.00679 | 0.00613 | 0.00629 | 0.00747 |
| P57759 | ERP29_MOUSE | 0.00000 | 0.00000 | 0.00000 | 0.00000 | 0.00000 | 0.00000 | 0.03125 | 0.01213 | 0.01954 | 0.01396 | 0.01542 | 0.01790 |
| P57776 | EF1D_MOUSE  | 0.00603 | 0.00444 | 0.00467 | 0.00145 | 0.00827 | 0.00459 | 0.02220 | 0.03204 | 0.03351 | 0.03485 | 0.02955 | 0.03294 |
| P57780 | ACTN4_MOUSE | 0.01978 | 0.02020 | 0.01905 | 0.01782 | 0.01883 | 0.02731 | 0.19523 | 0.21214 | 0.23587 | 0.21841 | 0.21247 | 0.21378 |
| P57784 | RU2A_MOUSE  | 0.00000 | 0.00000 | 0.00000 | 0.00000 | 0.00000 | 0.00000 | 0.01038 | 0.00946 | 0.00428 | 0.00600 | 0.00394 | 0.00856 |
| P58021 | TM9S2_MOUSE | 0.00326 | 0.00286 | 0.00219 | 0.00242 | 0.00302 | 0.00242 | 0.01204 | 0.00907 | 0.00976 | 0.00967 | 0.01006 | 0.00983 |
| P58044 | IDI1_MOUSE  | 0.00000 | 0.00000 | 0.00000 | 0.00000 | 0.00000 | 0.00000 | 0.00329 | 0.01171 | 0.01029 | 0.00532 | 0.01513 | 0.01085 |
| P58059 | RT21_MOUSE  | 0.00000 | 0.00000 | 0.00000 | 0.00000 | 0.00000 | 0.00000 | 0.00000 | 0.00040 | 0.00000 | 0.00000 | 0.00000 | 0.00000 |

|        |             |         |         |         |         |         |         |         |         |         |         |         |         |
|--------|-------------|---------|---------|---------|---------|---------|---------|---------|---------|---------|---------|---------|---------|
| P58196 | PLS4_MOUSE  | 0.00000 | 0.00000 | 0.00000 | 0.00000 | 0.00000 | 0.00000 | 0.00383 | 0.01304 | 0.00535 | 0.00490 | 0.00468 | 0.01017 |
| P58252 | EF2_MOUSE   | 0.10781 | 0.07127 | 0.11574 | 0.07261 | 0.09350 | 0.08400 | 0.07515 | 0.07924 | 0.07580 | 0.07577 | 0.06369 | 0.07710 |
| P58281 | OPA1_MOUSE  | 0.09433 | 0.06611 | 0.09242 | 0.06297 | 0.08465 | 0.07022 | 0.01493 | 0.00874 | 0.01434 | 0.01326 | 0.01211 | 0.00967 |
| P58389 | PTPA_MOUSE  | 0.00000 | 0.00000 | 0.00000 | 0.00000 | 0.00000 | 0.00000 | 0.00880 | 0.01067 | 0.01050 | 0.01216 | 0.00820 | 0.01390 |
| P58465 | CTDSL_MOUSE | 0.00000 | 0.00000 | 0.00000 | 0.00000 | 0.00000 | 0.00000 | 0.00308 | 0.00395 | 0.00526 | 0.00434 | 0.00445 | 0.00523 |
| P58735 | S26A1_MOUSE | 0.00000 | 0.00000 | 0.00000 | 0.00000 | 0.00000 | 0.00000 | 0.00000 | 0.00000 | 0.00000 | 0.00000 | 0.00000 | 0.00000 |
| P58771 | TPM1_MOUSE  | 0.80484 | 1.00498 | 0.83829 | 1.15520 | 0.79004 | 1.71158 | 0.41769 | 0.21665 | 0.21082 | 0.24089 | 0.17055 | 0.15474 |
| P58774 | TPM2_MOUSE  | 0.00024 | 0.00080 | 0.00051 | 0.00054 | 0.00060 | 0.00144 | 0.08415 | 0.04536 | 0.04251 | 0.05255 | 0.03971 | 0.03365 |
| P58871 | TB182_MOUSE | 0.00000 | 0.00000 | 0.00000 | 0.00000 | 0.00000 | 0.00000 | 0.01533 | 0.01910 | 0.02376 | 0.02400 | 0.02398 | 0.02671 |
| P59017 | B2L13_MOUSE | 0.02348 | 0.01764 | 0.02322 | 0.02830 | 0.02687 | 0.01970 | 0.00612 | 0.00351 | 0.00367 | 0.00307 | 0.00430 | 0.00432 |
| P59114 | CAPAM_MOUSE | 0.00000 | 0.00000 | 0.00000 | 0.00000 | 0.00000 | 0.00000 | 0.00000 | 0.00101 | 0.00214 | 0.00086 | 0.00272 | 0.00255 |
| P59158 | S12A3_MOUSE | 0.00000 | 0.00000 | 0.00000 | 0.00000 | 0.00000 | 0.00000 | 0.00037 | 0.00000 | 0.00018 | 0.00113 | 0.00000 | 0.00090 |
| P59242 | CING_MOUSE  | 0.00000 | 0.00000 | 0.00000 | 0.00000 | 0.00000 | 0.00000 | 0.01453 | 0.01369 | 0.02457 | 0.01963 | 0.02364 | 0.01712 |
| P59279 | RAB2B_MOUSE | 0.00000 | 0.00000 | 0.00000 | 0.00000 | 0.00000 | 0.00000 | 0.00000 | 0.00000 | 0.00000 | 0.00000 | 0.00000 | 0.00000 |
| P59325 | IF5_MOUSE   | 0.00000 | 0.00000 | 0.00000 | 0.00000 | 0.00000 | 0.00000 | 0.01351 | 0.00652 | 0.01217 | 0.01027 | 0.01531 | 0.00925 |
| P59326 | YTHD1_MOUSE | 0.00000 | 0.00000 | 0.00000 | 0.00000 | 0.00000 | 0.00000 | 0.00000 | 0.00194 | 0.00415 | 0.00234 | 0.00390 | 0.00244 |
| P59383 | LRRN4_MOUSE | 0.00000 | 0.00000 | 0.00000 | 0.00000 | 0.00000 | 0.00000 | 0.00000 | 0.00388 | 0.00000 | 0.00000 | 0.00000 | 0.00000 |
| P59481 | LMA2L_MOUSE | 0.00000 | 0.00000 | 0.00000 | 0.00000 | 0.00000 | 0.00000 | 0.00117 | 0.00088 | 0.00178 | 0.00175 | 0.00000 | 0.00000 |
| P59672 | ANS1A_MOUSE | 0.00000 | 0.00000 | 0.00000 | 0.00000 | 0.00000 | 0.00000 | 0.00467 | 0.00387 | 0.00881 | 0.00291 | 0.00000 | 0.00454 |
| P59708 | SF3B6_MOUSE | 0.00000 | 0.00000 | 0.00000 | 0.00000 | 0.00000 | 0.00000 | 0.01319 | 0.01069 | 0.00602 | 0.01118 | 0.00513 | 0.01454 |
| P59729 | RIN3_MOUSE  | 0.00000 | 0.00000 | 0.00000 | 0.00000 | 0.00000 | 0.00000 | 0.00175 | 0.00166 | 0.00190 | 0.00180 | 0.00000 | 0.00257 |
| P59764 | DOCK4_MOUSE | 0.00000 | 0.00000 | 0.00000 | 0.00000 | 0.00000 | 0.00000 | 0.00925 | 0.00591 | 0.01125 | 0.00793 | 0.01187 | 0.02198 |
| P59999 | ARPC4_MOUSE | 0.00000 | 0.00000 | 0.00000 | 0.00000 | 0.00000 | 0.00000 | 0.02094 | 0.03580 | 0.02288 | 0.02403 | 0.01989 | 0.02737 |
| P60060 | SC61G_MOUSE | 0.00000 | 0.00000 | 0.00000 | 0.00000 | 0.00000 | 0.00000 | 0.00000 | 0.00167 | 0.00035 | 0.00000 | 0.00000 | 0.00042 |
| P60122 | RUVB1_MOUSE | 0.00000 | 0.00000 | 0.00000 | 0.00000 | 0.00000 | 0.00000 | 0.01059 | 0.01264 | 0.01330 | 0.00879 | 0.01399 | 0.01841 |
| P60229 | EIF3E_MOUSE | 0.00000 | 0.00000 | 0.00000 | 0.00000 | 0.00000 | 0.00000 | 0.01500 | 0.01459 | 0.01504 | 0.01465 | 0.01343 | 0.01759 |
| P60335 | PCBP1_MOUSE | 0.01542 | 0.01280 | 0.00689 | 0.01001 | 0.00921 | 0.00830 | 0.01350 | 0.02220 | 0.01933 | 0.01800 | 0.01433 | 0.02020 |
| P60605 | UB2G2_MOUSE | 0.00000 | 0.00000 | 0.00000 | 0.00000 | 0.00000 | 0.00000 | 0.00025 | 0.00910 | 0.00226 | 0.00630 | 0.00000 | 0.00393 |
| P60670 | NPL4_MOUSE  | 0.00707 | 0.00250 | 0.00417 | 0.00399 | 0.00611 | 0.00570 | 0.01958 | 0.00681 | 0.01360 | 0.00672 | 0.00900 | 0.01035 |
| P60710 | ACTB_MOUSE  | 0.07968 | 0.05744 | 0.08021 | 0.05561 | 0.09549 | 0.09573 | 1.59983 | 1.81578 | 1.94920 | 1.80117 | 1.90440 | 1.79404 |
| P60766 | CDC42_MOUSE | 0.00000 | 0.00000 | 0.00000 | 0.00000 | 0.00000 | 0.00000 | 0.04033 | 0.02258 | 0.02849 | 0.02783 | 0.02921 | 0.03393 |
| P60824 | CIRBP_MOUSE | 0.00000 | 0.00000 | 0.00000 | 0.00000 | 0.00000 | 0.00000 | 0.00289 | 0.00573 | 0.00376 | 0.00459 | 0.00315 | 0.00770 |
| P60843 | IF4A1_MOUSE | 0.00419 | 0.00159 | 0.00315 | 0.00236 | 0.00296 | 0.00177 | 0.06058 | 0.06845 | 0.07735 | 0.08074 | 0.08517 | 0.07151 |
| P60867 | RS20_MOUSE  | 0.00000 | 0.00000 | 0.00000 | 0.00000 | 0.00000 | 0.00000 | 0.01231 | 0.02340 | 0.02691 | 0.02513 | 0.01806 | 0.01986 |



|        |             |         |         |         |         |         |         |         |         |         |         |         |         |
|--------|-------------|---------|---------|---------|---------|---------|---------|---------|---------|---------|---------|---------|---------|
| P60904 | DNJC5_MOUSE | 0.00000 | 0.00000 | 0.00000 | 0.00000 | 0.00000 | 0.00000 | 0.00667 | 0.00920 | 0.01328 | 0.01062 | 0.01460 | 0.01352 |
| P61021 | RAB5B_MOUSE | 0.00000 | 0.00000 | 0.00000 | 0.00000 | 0.00000 | 0.00000 | 0.01455 | 0.02723 | 0.02764 | 0.02321 | 0.03036 | 0.02880 |
| P61022 | CHP1_MOUSE  | 0.00000 | 0.00000 | 0.00000 | 0.00000 | 0.00000 | 0.00000 | 0.01330 | 0.00842 | 0.00775 | 0.01099 | 0.01004 | 0.01481 |
| P61027 | RAB10_MOUSE | 0.00000 | 0.00000 | 0.00000 | 0.00000 | 0.00000 | 0.00000 | 0.02507 | 0.02253 | 0.03639 | 0.02529 | 0.02914 | 0.03969 |
| P61028 | RAB8B_MOUSE | 0.00000 | 0.00000 | 0.00000 | 0.00000 | 0.00000 | 0.00000 | 0.00189 | 0.01058 | 0.00899 | 0.00476 | 0.00729 | 0.00709 |
| P61082 | UBC12_MOUSE | 0.00000 | 0.00000 | 0.00000 | 0.00000 | 0.00000 | 0.00000 | 0.00000 | 0.00533 | 0.00739 | 0.00675 | 0.00265 | 0.00261 |
| P61087 | UBE2K_MOUSE | 0.00000 | 0.00000 | 0.00000 | 0.00000 | 0.00000 | 0.00000 | 0.01668 | 0.01245 | 0.01003 | 0.01074 | 0.00802 | 0.01087 |
| P61089 | UBE2N_MOUSE | 0.00000 | 0.00000 | 0.00000 | 0.00000 | 0.00000 | 0.00000 | 0.03912 | 0.05064 | 0.03110 | 0.03889 | 0.03682 | 0.03742 |
| P61110 | ANRE_MOUSE  | 0.00000 | 0.00000 | 0.00000 | 0.00000 | 0.00000 | 0.00000 | 0.00000 | 0.00000 | 0.00000 | 0.00000 | 0.00000 | 0.00000 |
| P61148 | FGF1_MOUSE  | 0.00000 | 0.00000 | 0.00000 | 0.00000 | 0.00000 | 0.00000 | 0.00489 | 0.00560 | 0.00932 | 0.00718 | 0.00643 | 0.00949 |
| P61161 | ARP2_MOUSE  | 0.00747 | 0.00755 | 0.00668 | 0.00512 | 0.00668 | 0.00742 | 0.03931 | 0.04687 | 0.04906 | 0.04290 | 0.04009 | 0.03830 |
| P61164 | ACTZ_MOUSE  | 0.01106 | 0.00943 | 0.01416 | 0.00516 | 0.00877 | 0.01741 | 0.04542 | 0.05902 | 0.03992 | 0.04665 | 0.04736 | 0.04973 |
| P61202 | CSN2_MOUSE  | 0.00338 | 0.00702 | 0.00463 | 0.00681 | 0.00668 | 0.00689 | 0.00795 | 0.00765 | 0.01043 | 0.00975 | 0.00945 | 0.00901 |
| P84078 | ARF1_MOUSE  | 0.05361 | 0.03857 | 0.03631 | 0.02356 | 0.06307 | 0.06101 | 0.15273 | 0.21022 | 0.15840 | 0.20333 | 0.19159 | 0.19689 |
| P61211 | ARL1_MOUSE  | 0.00164 | 0.00087 | 0.00217 | 0.00213 | 0.00213 | 0.00226 | 0.00801 | 0.01406 | 0.00936 | 0.00976 | 0.01141 | 0.00844 |
| P61222 | ABCE1_MOUSE | 0.00541 | 0.00692 | 0.00438 | 0.00320 | 0.00380 | 0.00325 | 0.01814 | 0.01661 | 0.02249 | 0.01876 | 0.02729 | 0.02389 |
| P61226 | RAP2B_MOUSE | 0.00000 | 0.00000 | 0.00000 | 0.00000 | 0.00000 | 0.00000 | 0.00062 | 0.00000 | 0.00191 | 0.00116 | 0.00137 | 0.00181 |
| P61255 | RL26_MOUSE  | 0.00000 | 0.00000 | 0.00000 | 0.00000 | 0.00000 | 0.00000 | 0.00000 | 0.00632 | 0.00523 | 0.00436 | 0.00263 | 0.00273 |
| Q9CQL1 | MGN2_MOUSE  | 0.00000 | 0.00000 | 0.00000 | 0.00000 | 0.00000 | 0.00000 | 0.03081 | 0.02255 | 0.03446 | 0.02705 | 0.03461 | 0.02530 |
| P61358 | RL27_MOUSE  | 0.00000 | 0.00000 | 0.00000 | 0.00000 | 0.00000 | 0.00000 | 0.02320 | 0.02404 | 0.03192 | 0.02902 | 0.02569 | 0.02782 |
| P61458 | PHS_MOUSE   | 0.00000 | 0.00000 | 0.00000 | 0.00000 | 0.00000 | 0.00000 | 0.00000 | 0.00000 | 0.00000 | 0.00000 | 0.00000 | 0.00000 |
| P61514 | RL37A_MOUSE | 0.00000 | 0.00000 | 0.00000 | 0.00000 | 0.00000 | 0.00000 | 0.05011 | 0.03012 | 0.02937 | 0.03235 | 0.03946 | 0.03440 |
| P61620 | S61A1_MOUSE | 0.00000 | 0.00000 | 0.00000 | 0.00000 | 0.00000 | 0.00000 | 0.00000 | 0.00903 | 0.00196 | 0.01279 | 0.00252 | 0.00558 |
| P61750 | ARF4_MOUSE  | 0.00000 | 0.00000 | 0.00000 | 0.00000 | 0.00000 | 0.00000 | 0.01572 | 0.01713 | 0.00825 | 0.01371 | 0.01703 | 0.00850 |
| P61759 | PFD3_MOUSE  | 0.00000 | 0.00000 | 0.00000 | 0.00000 | 0.00000 | 0.00000 | 0.00499 | 0.00797 | 0.00642 | 0.00620 | 0.01271 | 0.00770 |
| P61804 | DAD1_MOUSE  | 0.00000 | 0.00000 | 0.00000 | 0.00000 | 0.00000 | 0.00000 | 0.01458 | 0.02094 | 0.00673 | 0.01624 | 0.00433 | 0.01822 |
| P61922 | GABT_MOUSE  | 0.00512 | 0.00292 | 0.00400 | 0.00528 | 0.00446 | 0.00227 | 0.00000 | 0.00007 | 0.00010 | 0.00000 | 0.00011 | 0.00015 |
| P61924 | COPZ1_MOUSE | 0.00000 | 0.00000 | 0.00000 | 0.00000 | 0.00000 | 0.00000 | 0.01601 | 0.01395 | 0.01645 | 0.01759 | 0.02346 | 0.01895 |
| P61939 | THBG_MOUSE  | 0.00000 | 0.00000 | 0.00000 | 0.00000 | 0.00000 | 0.00000 | 0.00000 | 0.00000 | 0.00022 | 0.00344 | 0.00000 | 0.00112 |
| P61953 | GBG11_MOUSE | 0.00000 | 0.00000 | 0.00000 | 0.00000 | 0.00000 | 0.00000 | 0.00000 | 0.00000 | 0.00345 | 0.00221 | 0.00130 | 0.00117 |
| P61957 | SUMO2_MOUSE | 0.00000 | 0.00000 | 0.00000 | 0.00000 | 0.00000 | 0.00000 | 0.00000 | 0.02164 | 0.01922 | 0.03568 | 0.01660 | 0.01962 |
| P61961 | UFM1_MOUSE  | 0.00000 | 0.00000 | 0.00000 | 0.00000 | 0.00000 | 0.00000 | 0.01262 | 0.00599 | 0.01598 | 0.00898 | 0.01710 | 0.00887 |
| P61965 | WDR5_MOUSE  | 0.00000 | 0.00000 | 0.00000 | 0.00000 | 0.00000 | 0.00000 | 0.00129 | 0.00334 | 0.00238 | 0.00318 | 0.00281 | 0.00413 |
| P61967 | AP1S1_MOUSE | 0.00000 | 0.00000 | 0.00000 | 0.00000 | 0.00000 | 0.00000 | 0.00431 | 0.00312 | 0.00700 | 0.01023 | 0.00350 | 0.00950 |

|        |             |         |         |         |         |         |         |         |         |         |         |         |         |
|--------|-------------|---------|---------|---------|---------|---------|---------|---------|---------|---------|---------|---------|---------|
| P61971 | NTF2_MOUSE  | 0.01119 | 0.00648 | 0.00544 | 0.00729 | 0.00774 | 0.00836 | 0.01016 | 0.00664 | 0.01488 | 0.00557 | 0.01676 | 0.00618 |
| P61979 | HNRPK_MOUSE | 0.01870 | 0.01007 | 0.01488 | 0.01520 | 0.01697 | 0.01183 | 0.15436 | 0.13408 | 0.13988 | 0.16367 | 0.16051 | 0.14035 |
| P61982 | 1433G_MOUSE | 0.04350 | 0.03864 | 0.03056 | 0.03717 | 0.03641 | 0.03948 | 0.04570 | 0.05465 | 0.09661 | 0.08891 | 0.08112 | 0.12294 |
| P62046 | LRCH1_MOUSE | 0.00000 | 0.00000 | 0.00000 | 0.00000 | 0.00000 | 0.00000 | 0.00611 | 0.00738 | 0.01098 | 0.00636 | 0.00776 | 0.01019 |
| P62071 | RRAS2_MOUSE | 0.02014 | 0.01926 | 0.01802 | 0.01411 | 0.01593 | 0.02009 | 0.00786 | 0.00259 | 0.00958 | 0.00694 | 0.01006 | 0.00817 |
| P62075 | TIM13_MOUSE | 0.00000 | 0.00000 | 0.00000 | 0.00000 | 0.00000 | 0.00000 | 0.00194 | 0.00084 | 0.00053 | 0.00042 | 0.00049 | 0.00020 |
| P62082 | RS7_MOUSE   | 0.00000 | 0.00000 | 0.00000 | 0.00000 | 0.00000 | 0.00000 | 0.00840 | 0.01193 | 0.01665 | 0.01645 | 0.02557 | 0.02212 |
| P62137 | PP1A_MOUSE  | 0.00000 | 0.00000 | 0.00000 | 0.00000 | 0.00000 | 0.00000 | 0.00758 | 0.03123 | 0.01939 | 0.01451 | 0.01420 | 0.01430 |
| P62141 | PP1B_MOUSE  | 0.02897 | 0.02544 | 0.02062 | 0.02291 | 0.02330 | 0.02277 | 0.07390 | 0.06929 | 0.08481 | 0.06985 | 0.07196 | 0.07062 |
| P62192 | PRS4_MOUSE  | 0.00734 | 0.00513 | 0.00755 | 0.00596 | 0.00828 | 0.00633 | 0.03309 | 0.02291 | 0.02596 | 0.02513 | 0.02584 | 0.02416 |
| P62196 | PRS8_MOUSE  | 0.01247 | 0.02170 | 0.01441 | 0.01243 | 0.01210 | 0.01036 | 0.01758 | 0.01845 | 0.02166 | 0.01982 | 0.01715 | 0.02172 |
| P62242 | RS8_MOUSE   | 0.02010 | 0.02809 | 0.01983 | 0.01721 | 0.01663 | 0.01950 | 0.04803 | 0.05432 | 0.02830 | 0.04699 | 0.03073 | 0.05036 |
| P62245 | RS15A_MOUSE | 0.00244 | 0.00214 | 0.00128 | 0.00143 | 0.00148 | 0.00047 | 0.06897 | 0.05706 | 0.07590 | 0.07518 | 0.09097 | 0.05376 |
| P62254 | UB2G1_MOUSE | 0.00000 | 0.00000 | 0.00000 | 0.00000 | 0.00000 | 0.00000 | 0.01101 | 0.00296 | 0.00274 | 0.00318 | 0.00200 | 0.00599 |
| P62257 | UBE2H_MOUSE | 0.00000 | 0.00000 | 0.00000 | 0.00000 | 0.00000 | 0.00000 | 0.00221 | 0.00315 | 0.00265 | 0.00111 | 0.00291 | 0.00243 |
| P62259 | 1433E_MOUSE | 0.03061 | 0.06485 | 0.06727 | 0.08173 | 0.07620 | 0.07016 | 0.19596 | 0.31086 | 0.27559 | 0.29950 | 0.33465 | 0.33445 |
| P62264 | RS14_MOUSE  | 0.01499 | 0.03079 | 0.01979 | 0.01060 | 0.01756 | 0.01417 | 0.03727 | 0.04698 | 0.03104 | 0.05120 | 0.02854 | 0.04055 |
| P62267 | RS23_MOUSE  | 0.00000 | 0.00000 | 0.00000 | 0.00000 | 0.00000 | 0.00000 | 0.00442 | 0.00883 | 0.00464 | 0.00569 | 0.00402 | 0.00600 |
| P62270 | RS18_MOUSE  | 0.00000 | 0.00000 | 0.00000 | 0.00000 | 0.00000 | 0.00000 | 0.19336 | 0.10579 | 0.14711 | 0.12416 | 0.11996 | 0.11498 |
| P62274 | RS29_MOUSE  | 0.00000 | 0.00000 | 0.00000 | 0.00000 | 0.00000 | 0.00000 | 0.00000 | 0.00770 | 0.00876 | 0.00548 | 0.00205 | 0.00183 |
| P62281 | RS11_MOUSE  | 0.00000 | 0.00000 | 0.00000 | 0.00000 | 0.00000 | 0.00000 | 0.01933 | 0.02183 | 0.02992 | 0.02162 | 0.01952 | 0.02076 |
| P62301 | RS13_MOUSE  | 0.00000 | 0.00000 | 0.00000 | 0.00000 | 0.00000 | 0.00000 | 0.10896 | 0.02506 | 0.08470 | 0.06681 | 0.09188 | 0.07776 |
| P62305 | RUXE_MOUSE  | 0.00000 | 0.00000 | 0.00000 | 0.00000 | 0.00000 | 0.00000 | 0.00000 | 0.00415 | 0.00262 | 0.00462 | 0.00496 | 0.00678 |
| P62307 | RUXF_MOUSE  | 0.00000 | 0.00000 | 0.00000 | 0.00000 | 0.00000 | 0.00000 | 0.00000 | 0.00490 | 0.00839 | 0.00866 | 0.00473 | 0.00418 |
| P62309 | RUXG_MOUSE  | 0.00000 | 0.00000 | 0.00000 | 0.00000 | 0.00000 | 0.00000 | 0.00511 | 0.00297 | 0.00298 | 0.00424 | 0.00000 | 0.00000 |
| P62311 | LSM3_MOUSE  | 0.00000 | 0.00000 | 0.00000 | 0.00000 | 0.00000 | 0.00000 | 0.01808 | 0.01193 | 0.00565 | 0.01521 | 0.00746 | 0.01769 |
| P62315 | SMD1_MOUSE  | 0.00000 | 0.00000 | 0.00000 | 0.00000 | 0.00000 | 0.00000 | 0.00065 | 0.00995 | 0.00691 | 0.00761 | 0.00505 | 0.00871 |
| P62317 | SMD2_MOUSE  | 0.00000 | 0.00000 | 0.00000 | 0.00000 | 0.00000 | 0.00000 | 0.04519 | 0.04957 | 0.04334 | 0.05600 | 0.07209 | 0.06449 |
| P62320 | SMD3_MOUSE  | 0.00000 | 0.00000 | 0.00000 | 0.00000 | 0.00000 | 0.00000 | 0.01644 | 0.01121 | 0.02268 | 0.01774 | 0.02325 | 0.01991 |
| P62331 | ARF6_MOUSE  | 0.00000 | 0.00000 | 0.00000 | 0.00000 | 0.00000 | 0.00000 | 0.03629 | 0.03609 | 0.02465 | 0.03075 | 0.03760 | 0.03310 |
| P62334 | PRS10_MOUSE | 0.00278 | 0.00245 | 0.00459 | 0.00331 | 0.00357 | 0.00298 | 0.01696 | 0.01511 | 0.02148 | 0.01933 | 0.02156 | 0.02061 |
| P62342 | SELT_MOUSE  | 0.00000 | 0.00000 | 0.00000 | 0.00000 | 0.00000 | 0.00000 | 0.00000 | 0.00205 | 0.00000 | 0.00259 | 0.00000 | 0.00000 |
| P62627 | DLRB1_MOUSE | 0.00000 | 0.00000 | 0.00000 | 0.00000 | 0.00000 | 0.00000 | 0.01284 | 0.00894 | 0.01278 | 0.01251 | 0.00873 | 0.01001 |
| P62631 | EF1A2_MOUSE | 0.08332 | 0.07869 | 0.16338 | 0.12659 | 0.09414 | 0.06491 | 0.00110 | 0.00282 | 0.00193 | 0.00403 | 0.00151 | 0.00108 |

|        |             |         |         |         |         |         |         |         |         |         |         |         |         |
|--------|-------------|---------|---------|---------|---------|---------|---------|---------|---------|---------|---------|---------|---------|
| P62702 | RS4X_MOUSE  | 0.00766 | 0.01395 | 0.01559 | 0.01158 | 0.01724 | 0.01992 | 0.03185 | 0.03273 | 0.04173 | 0.03893 | 0.02934 | 0.04011 |
| P63330 | PP2AA_MOUSE | 0.00935 | 0.01574 | 0.00167 | 0.00786 | 0.01529 | 0.01674 | 0.04102 | 0.03790 | 0.03485 | 0.03681 | 0.03037 | 0.04204 |
| P62717 | RL18A_MOUSE | 0.00000 | 0.00000 | 0.00000 | 0.00000 | 0.00000 | 0.00000 | 0.01522 | 0.00931 | 0.01268 | 0.01146 | 0.00906 | 0.01313 |
| P62737 | ACTA_MOUSE  | 0.00498 | 0.00593 | 0.00514 | 0.00454 | 0.00364 | 0.00000 | 0.03415 | 0.07125 | 0.11563 | 0.06399 | 0.06984 | 0.07261 |
| P62743 | AP2S1_MOUSE | 0.00000 | 0.00000 | 0.00000 | 0.00000 | 0.00000 | 0.00000 | 0.01379 | 0.02189 | 0.02809 | 0.02194 | 0.01692 | 0.02193 |
| P62748 | HPCL1_MOUSE | 0.00000 | 0.00000 | 0.00000 | 0.00000 | 0.00000 | 0.00000 | 0.02591 | 0.02974 | 0.03194 | 0.02505 | 0.02822 | 0.02882 |
| P62751 | RL23A_MOUSE | 0.00432 | 0.00323 | 0.00367 | 0.00313 | 0.00294 | 0.00328 | 0.01729 | 0.03475 | 0.04646 | 0.02779 | 0.02708 | 0.04261 |
| P62754 | RS6_MOUSE   | 0.00000 | 0.00000 | 0.00000 | 0.00000 | 0.00000 | 0.00000 | 0.03986 | 0.05127 | 0.01907 | 0.03813 | 0.01887 | 0.04339 |
| P62761 | VISL1_MOUSE | 0.00000 | 0.00000 | 0.00000 | 0.00000 | 0.00000 | 0.00000 | 0.00299 | 0.00498 | 0.00472 | 0.00448 | 0.00275 | 0.00404 |
| P62774 | MTPN_MOUSE  | 0.00000 | 0.00000 | 0.00000 | 0.00000 | 0.00000 | 0.00000 | 0.06073 | 0.05641 | 0.06549 | 0.07149 | 0.06948 | 0.07231 |
| P62806 | H4_MOUSE    | 0.00000 | 0.00000 | 0.00000 | 0.00000 | 0.00000 | 0.00000 | 0.69637 | 1.35845 | 0.82841 | 1.23400 | 0.96495 | 1.43323 |
| P62814 | VATB2_MOUSE | 0.00217 | 0.00232 | 0.00065 | 0.00169 | 0.00132 | 0.00182 | 0.00986 | 0.02135 | 0.01749 | 0.01618 | 0.01632 | 0.01717 |
| P62821 | RAB1A_MOUSE | 0.01364 | 0.00959 | 0.02148 | 0.02171 | 0.02923 | 0.02274 | 0.10665 | 0.12118 | 0.12930 | 0.14091 | 0.14363 | 0.13792 |
| P62827 | RAN_MOUSE   | 0.00000 | 0.00000 | 0.00000 | 0.00000 | 0.00000 | 0.00000 | 0.02625 | 0.06480 | 0.08234 | 0.05138 | 0.04194 | 0.07220 |
| P62830 | RL23_MOUSE  | 0.01012 | 0.01026 | 0.01612 | 0.01338 | 0.01096 | 0.00756 | 0.09250 | 0.09137 | 0.11648 | 0.11327 | 0.10975 | 0.12480 |
| P62835 | RAP1A_MOUSE | 0.00705 | 0.00553 | 0.00531 | 0.00981 | 0.00801 | 0.00700 | 0.00409 | 0.01965 | 0.01443 | 0.01466 | 0.01106 | 0.01890 |
| P62843 | RS15_MOUSE  | 0.00000 | 0.00000 | 0.00000 | 0.00000 | 0.00000 | 0.00000 | 0.00518 | 0.02439 | 0.01237 | 0.01720 | 0.00290 | 0.00721 |
| P62849 | RS24_MOUSE  | 0.00306 | 0.00812 | 0.00299 | 0.00440 | 0.00531 | 0.00686 | 0.04012 | 0.03345 | 0.03042 | 0.03529 | 0.03093 | 0.04196 |
| P62852 | RS25_MOUSE  | 0.00000 | 0.00000 | 0.00000 | 0.00000 | 0.00000 | 0.00000 | 0.01078 | 0.02156 | 0.00866 | 0.00876 | 0.00791 | 0.01437 |
| P62855 | RS26_MOUSE  | 0.00000 | 0.00000 | 0.00000 | 0.00000 | 0.00000 | 0.00000 | 0.07184 | 0.05825 | 0.04659 | 0.05310 | 0.05180 | 0.06241 |
| P62858 | RS28_MOUSE  | 0.00000 | 0.00000 | 0.00000 | 0.00000 | 0.00000 | 0.00000 | 0.03710 | 0.05891 | 0.03279 | 0.06622 | 0.02697 | 0.04711 |
| P62862 | RS30_MOUSE  | 0.00000 | 0.00000 | 0.00000 | 0.00000 | 0.00000 | 0.00000 | 0.00000 | 0.00000 | 0.00099 | 0.00000 | 0.00000 | 0.00221 |
| P62869 | ELOB_MOUSE  | 0.00000 | 0.00000 | 0.00000 | 0.00000 | 0.00000 | 0.00000 | 0.00245 | 0.01247 | 0.01410 | 0.01521 | 0.00968 | 0.01292 |
| P62874 | GBB1_MOUSE  | 0.00737 | 0.00758 | 0.00313 | 0.00377 | 0.00457 | 0.00601 | 0.09569 | 0.10997 | 0.11367 | 0.12488 | 0.11166 | 0.09149 |
| P62878 | RBX1_MOUSE  | 0.03640 | 0.02291 | 0.04381 | 0.01962 | 0.01690 | 0.02866 | 0.00000 | 0.00710 | 0.00696 | 0.00983 | 0.00631 | 0.00635 |
| P62889 | RL30_MOUSE  | 0.01523 | 0.01544 | 0.01008 | 0.01121 | 0.01061 | 0.01342 | 0.00629 | 0.00752 | 0.01434 | 0.01084 | 0.00999 | 0.01006 |
| P62892 | RL39_MOUSE  | 0.00000 | 0.00000 | 0.00000 | 0.00000 | 0.00000 | 0.00000 | 0.00000 | 0.00104 | 0.00217 | 0.00123 | 0.00121 | 0.00116 |
| P62897 | CYC_MOUSE   | 0.03084 | 0.02599 | 0.04556 | 0.03556 | 0.03630 | 0.04186 | 0.09600 | 0.05229 | 0.05742 | 0.03821 | 0.06647 | 0.04899 |
| P62900 | RL31_MOUSE  | 0.00000 | 0.00000 | 0.00000 | 0.00000 | 0.00000 | 0.00000 | 0.00988 | 0.02022 | 0.01353 | 0.01768 | 0.01738 | 0.02118 |
| P62908 | RS3_MOUSE   | 0.00979 | 0.01636 | 0.01313 | 0.00673 | 0.01251 | 0.01006 | 0.04716 | 0.05115 | 0.03967 | 0.04737 | 0.04913 | 0.04743 |
| P62911 | RL32_MOUSE  | 0.00000 | 0.00000 | 0.00000 | 0.00000 | 0.00000 | 0.00000 | 0.00000 | 0.00097 | 0.00848 | 0.00470 | 0.00000 | 0.00244 |
| P62918 | RL8_MOUSE   | 0.00000 | 0.00000 | 0.00000 | 0.00000 | 0.00000 | 0.00000 | 0.00000 | 0.01368 | 0.01287 | 0.01446 | 0.01066 | 0.00800 |
| P62960 | YBOX1_MOUSE | 0.01244 | 0.00669 | 0.00965 | 0.00974 | 0.00522 | 0.00265 | 0.01738 | 0.04787 | 0.07704 | 0.07065 | 0.05038 | 0.04941 |
| P62996 | TRA2B_MOUSE | 0.00394 | 0.00468 | 0.00216 | 0.00160 | 0.00346 | 0.00270 | 0.00648 | 0.03280 | 0.00858 | 0.00269 | 0.00233 | 0.01900 |



|        |             |         |         |         |         |         |         |         |         |         |         |         |         |
|--------|-------------|---------|---------|---------|---------|---------|---------|---------|---------|---------|---------|---------|---------|
| P63001 | RAC1_MOUSE  | 0.00430 | 0.01208 | 0.00155 | 0.00425 | 0.00541 | 0.00495 | 0.09248 | 0.14427 | 0.10790 | 0.11853 | 0.13331 | 0.13769 |
| P63005 | LIS1_MOUSE  | 0.00307 | 0.00276 | 0.00473 | 0.00357 | 0.00314 | 0.00183 | 0.01366 | 0.03024 | 0.04183 | 0.03323 | 0.03743 | 0.03041 |
| P63011 | RAB3A_MOUSE | 0.00827 | 0.00597 | 0.00848 | 0.00600 | 0.00585 | 0.00599 | 0.00801 | 0.00908 | 0.00844 | 0.00768 | 0.00331 | 0.00575 |
| P63017 | HSP7C_MOUSE | 0.12938 | 0.16339 | 0.13238 | 0.15860 | 0.12005 | 0.23976 | 0.20312 | 0.22026 | 0.19980 | 0.23209 | 0.17106 | 0.22795 |
| P63024 | VAMP3_MOUSE | 0.00144 | 0.00091 | 0.00122 | 0.00187 | 0.00187 | 0.00145 | 0.04208 | 0.04512 | 0.03968 | 0.04091 | 0.03619 | 0.05323 |
| P63028 | TCTP_MOUSE  | 0.00000 | 0.00000 | 0.00000 | 0.00000 | 0.00000 | 0.00000 | 0.07804 | 0.07893 | 0.05563 | 0.07024 | 0.06381 | 0.07329 |
| P63037 | DNJA1_MOUSE | 0.00000 | 0.00000 | 0.00000 | 0.00000 | 0.00000 | 0.00000 | 0.01399 | 0.01359 | 0.01680 | 0.01898 | 0.01890 | 0.01476 |
| P63038 | CH60_MOUSE  | 0.41886 | 0.26068 | 0.29535 | 0.25132 | 0.37506 | 0.32831 | 0.06775 | 0.06855 | 0.05807 | 0.05719 | 0.06879 | 0.07397 |
| P63044 | VAMP2_MOUSE | 0.00205 | 0.00116 | 0.00178 | 0.00085 | 0.00229 | 0.00306 | 0.00531 | 0.01863 | 0.00540 | 0.00900 | 0.00716 | 0.01473 |
| P63073 | IF4E_MOUSE  | 0.00222 | 0.00075 | 0.00116 | 0.00162 | 0.00080 | 0.00035 | 0.00130 | 0.00549 | 0.00577 | 0.00485 | 0.00366 | 0.00461 |
| P63082 | VATL_MOUSE  | 0.00000 | 0.00000 | 0.00000 | 0.00000 | 0.00000 | 0.00000 | 0.00000 | 0.00394 | 0.00000 | 0.00000 | 0.00000 | 0.00212 |
| P63085 | MK01_MOUSE  | 0.00145 | 0.00338 | 0.00242 | 0.00390 | 0.00338 | 0.00262 | 0.01471 | 0.01498 | 0.01574 | 0.01643 | 0.01265 | 0.01647 |
| P63087 | PP1G_MOUSE  | 0.00000 | 0.00000 | 0.00000 | 0.00000 | 0.00000 | 0.00000 | 0.01234 | 0.00921 | 0.01044 | 0.00974 | 0.00425 | 0.01203 |
| Q6R0H7 | GNAS1_MOUSE | 0.00698 | 0.01094 | 0.00882 | 0.00457 | 0.00854 | 0.00592 | 0.02981 | 0.02153 | 0.03141 | 0.02624 | 0.03046 | 0.02620 |
| P63101 | 1433Z_MOUSE | 0.00000 | 0.00000 | 0.00000 | 0.00000 | 0.00000 | 0.00000 | 0.20002 | 0.47607 | 0.54544 | 0.47292 | 0.39766 | 0.36723 |
| P63158 | HMGB1_MOUSE | 0.00000 | 0.00000 | 0.00000 | 0.00000 | 0.00000 | 0.00000 | 0.06377 | 0.07585 | 0.12059 | 0.09667 | 0.10239 | 0.09899 |
| P63166 | SUMO1_MOUSE | 0.00000 | 0.00000 | 0.00000 | 0.00000 | 0.00000 | 0.00000 | 0.00000 | 0.00105 | 0.00253 | 0.00193 | 0.00122 | 0.00066 |
| Q9D0M5 | DYL2_MOUSE  | 0.00000 | 0.00000 | 0.00000 | 0.00000 | 0.00000 | 0.00000 | 0.00303 | 0.02494 | 0.04123 | 0.03520 | 0.02138 | 0.02099 |
| P63213 | GBG2_MOUSE  | 0.00000 | 0.00000 | 0.00000 | 0.00000 | 0.00000 | 0.00000 | 0.00000 | 0.02372 | 0.01247 | 0.02486 | 0.01159 | 0.02118 |
| P63242 | IF5A1_MOUSE | 0.00696 | 0.00116 | 0.00528 | 0.00472 | 0.00465 | 0.00165 | 0.03092 | 0.02445 | 0.03492 | 0.02986 | 0.03126 | 0.02740 |
| P63268 | ACTH_MOUSE  | 0.00000 | 0.00000 | 0.00000 | 0.00000 | 0.00000 | 0.00000 | 0.00000 | 0.00062 | 0.00452 | 0.00142 | 0.00090 | 0.00092 |
| P63276 | RS17_MOUSE  | 0.00000 | 0.00000 | 0.00000 | 0.00000 | 0.00000 | 0.00000 | 0.06774 | 0.02778 | 0.02992 | 0.02427 | 0.04085 | 0.02845 |
| P63280 | UBC9_MOUSE  | 0.00000 | 0.00000 | 0.00000 | 0.00000 | 0.00000 | 0.00000 | 0.00723 | 0.00811 | 0.00787 | 0.00637 | 0.00607 | 0.00828 |
| P63321 | RALA_MOUSE  | 0.00000 | 0.00000 | 0.00000 | 0.00000 | 0.00000 | 0.00000 | 0.02622 | 0.03347 | 0.02504 | 0.02706 | 0.02357 | 0.02828 |
| P63323 | RS12_MOUSE  | 0.00000 | 0.00000 | 0.00000 | 0.00000 | 0.00000 | 0.00000 | 0.00558 | 0.00719 | 0.01116 | 0.00991 | 0.01405 | 0.00980 |
| P63325 | RS10_MOUSE  | 0.00000 | 0.00000 | 0.00000 | 0.00000 | 0.00000 | 0.00000 | 0.01945 | 0.02121 | 0.02155 | 0.01524 | 0.02602 | 0.03749 |
| P63328 | PP2BA_MOUSE | 0.00000 | 0.00000 | 0.00000 | 0.00000 | 0.00000 | 0.00000 | 0.01161 | 0.02153 | 0.02337 | 0.02240 | 0.01933 | 0.02215 |
| P67778 | PHB_MOUSE   | 0.04984 | 0.05511 | 0.03964 | 0.03842 | 0.04607 | 0.04095 | 0.02116 | 0.02198 | 0.02723 | 0.02267 | 0.03212 | 0.02385 |
| P67871 | CSK2B_MOUSE | 0.00000 | 0.00000 | 0.00000 | 0.00000 | 0.00000 | 0.00000 | 0.00494 | 0.00468 | 0.00554 | 0.00290 | 0.00543 | 0.00584 |
| P67984 | RL22_MOUSE  | 0.00094 | 0.00325 | 0.00035 | 0.00068 | 0.00375 | 0.00371 | 0.00585 | 0.03306 | 0.01558 | 0.02058 | 0.00759 | 0.02159 |
| P68033 | ACTC_MOUSE  | 0.00000 | 0.00000 | 0.00000 | 0.00000 | 0.00000 | 0.00000 | 0.50556 | 0.42212 | 0.29661 | 0.39543 | 0.27352 | 0.42147 |
| P68037 | UB2L3_MOUSE | 0.00000 | 0.00000 | 0.00000 | 0.00000 | 0.00000 | 0.00000 | 0.03145 | 0.02015 | 0.03392 | 0.02828 | 0.03971 | 0.03433 |
| P68040 | RACK1_MOUSE | 0.00657 | 0.00511 | 0.00656 | 0.00799 | 0.00801 | 0.00623 | 0.03607 | 0.05118 | 0.02851 | 0.04094 | 0.03549 | 0.03478 |
| P68134 | ACTS_MOUSE  | 0.00000 | 0.00000 | 0.00000 | 0.00000 | 0.00000 | 0.00000 | 2.68769 | 0.95659 | 1.07257 | 1.15723 | 1.33753 | 0.99757 |

|        |             |         |         |         |         |         |         |         |         |         |         |         |         |
|--------|-------------|---------|---------|---------|---------|---------|---------|---------|---------|---------|---------|---------|---------|
| P68181 | KAPCB_MOUSE | 0.00000 | 0.00000 | 0.00000 | 0.00000 | 0.00000 | 0.00000 | 0.00101 | 0.00691 | 0.00752 | 0.00458 | 0.00732 | 0.00766 |
| P68254 | 1433T_MOUSE | 0.00000 | 0.00000 | 0.00000 | 0.00000 | 0.00000 | 0.00000 | 0.07252 | 0.13770 | 0.13525 | 0.11463 | 0.11937 | 0.11661 |
| P68368 | TBA4A_MOUSE | 0.13004 | 0.16767 | 0.11158 | 0.07652 | 0.09359 | 0.11236 | 0.07983 | 0.03013 | 0.05601 | 0.06386 | 0.05642 | 0.05537 |
| P68372 | TBB4B_MOUSE | 0.00000 | 0.00000 | 0.00000 | 0.00000 | 0.00000 | 0.00000 | 0.48016 | 0.50426 | 0.50824 | 0.53826 | 0.48460 | 0.56309 |
| P68373 | TBA1C_MOUSE | 0.00000 | 0.00000 | 0.00000 | 0.00000 | 0.00000 | 0.00000 | 0.00000 | 0.00209 | 0.00000 | 0.00616 | 0.00000 | 0.00086 |
| P68404 | KPCB_MOUSE  | 0.00000 | 0.00000 | 0.00000 | 0.00000 | 0.00000 | 0.00000 | 0.00247 | 0.00151 | 0.00723 | 0.00471 | 0.00439 | 0.00275 |
| P68510 | 1433F_MOUSE | 0.00876 | 0.01645 | 0.01709 | 0.00874 | 0.02673 | 0.00995 | 0.03314 | 0.08388 | 0.10497 | 0.11831 | 0.06456 | 0.07127 |
| P70122 | SBDS_MOUSE  | 0.00000 | 0.00000 | 0.00000 | 0.00000 | 0.00000 | 0.00000 | 0.01597 | 0.01175 | 0.01676 | 0.01315 | 0.01765 | 0.01333 |
| P70158 | ASM3A_MOUSE | 0.00000 | 0.00000 | 0.00000 | 0.00000 | 0.00000 | 0.00000 | 0.00219 | 0.00224 | 0.00444 | 0.00312 | 0.00403 | 0.00241 |
| P70168 | IMB1_MOUSE  | 0.01130 | 0.01085 | 0.01773 | 0.02163 | 0.01320 | 0.01550 | 0.02558 | 0.02161 | 0.03298 | 0.02434 | 0.03570 | 0.02569 |
| P70195 | PSB7_MOUSE  | 0.00000 | 0.00000 | 0.00000 | 0.00000 | 0.00000 | 0.00000 | 0.00000 | 0.00104 | 0.00588 | 0.00470 | 0.00106 | 0.00100 |
| P70202 | LXN_MOUSE   | 0.00000 | 0.00000 | 0.00000 | 0.00000 | 0.00000 | 0.00000 | 0.01580 | 0.01633 | 0.01332 | 0.01951 | 0.01535 | 0.01969 |
| P70227 | ITPR3_MOUSE | 0.00000 | 0.00000 | 0.00000 | 0.00000 | 0.00000 | 0.00000 | 0.00000 | 0.00000 | 0.00000 | 0.00000 | 0.00000 | 0.00000 |
| P70245 | EBP_MOUSE   | 0.00000 | 0.00000 | 0.00000 | 0.00000 | 0.00000 | 0.00000 | 0.02101 | 0.01093 | 0.01870 | 0.01521 | 0.01752 | 0.01508 |
| P70261 | PALD_MOUSE  | 0.00000 | 0.00000 | 0.00000 | 0.00000 | 0.00000 | 0.00000 | 0.01293 | 0.00490 | 0.00920 | 0.03002 | 0.00945 | 0.03794 |
| P70268 | PKN1_MOUSE  | 0.00000 | 0.00000 | 0.00000 | 0.00000 | 0.00000 | 0.00000 | 0.00664 | 0.00759 | 0.00716 | 0.00701 | 0.00759 | 0.00848 |
| P70274 | SEPP1_MOUSE | 0.00000 | 0.00000 | 0.00000 | 0.00000 | 0.00000 | 0.00000 | 0.00544 | 0.00000 | 0.00323 | 0.00221 | 0.00565 | 0.00374 |
| P70275 | SEM3E_MOUSE | 0.00000 | 0.00000 | 0.00000 | 0.00000 | 0.00000 | 0.00000 | 0.00000 | 0.00100 | 0.00000 | 0.00000 | 0.00284 | 0.00000 |
| P70280 | VAMP7_MOUSE | 0.00000 | 0.00000 | 0.00000 | 0.00000 | 0.00000 | 0.00000 | 0.00000 | 0.00000 | 0.00228 | 0.00179 | 0.00000 | 0.00055 |
| P70290 | EM55_MOUSE  | 0.00000 | 0.00000 | 0.00000 | 0.00000 | 0.00000 | 0.00000 | 0.01038 | 0.00635 | 0.00641 | 0.00851 | 0.01206 | 0.00554 |
| P70296 | PEBP1_MOUSE | 0.06994 | 0.04732 | 0.04006 | 0.07937 | 0.04303 | 0.05331 | 0.07303 | 0.07320 | 0.04426 | 0.06437 | 0.05615 | 0.07055 |
| P70297 | STAM1_MOUSE | 0.00000 | 0.00000 | 0.00000 | 0.00000 | 0.00000 | 0.00000 | 0.01133 | 0.00949 | 0.01528 | 0.01846 | 0.01668 | 0.01806 |
| P70302 | STIM1_MOUSE | 0.00000 | 0.00000 | 0.00000 | 0.00000 | 0.00000 | 0.00000 | 0.00576 | 0.00693 | 0.00891 | 0.00456 | 0.00661 | 0.00729 |
| P70303 | PYRG2_MOUSE | 0.00000 | 0.00000 | 0.00000 | 0.00000 | 0.00000 | 0.00000 | 0.00363 | 0.00390 | 0.00502 | 0.00381 | 0.00451 | 0.00374 |
| P70315 | WASP_MOUSE  | 0.00000 | 0.00000 | 0.00000 | 0.00000 | 0.00000 | 0.00000 | 0.01733 | 0.00525 | 0.00000 | 0.00000 | 0.00254 | 0.00400 |
| P70318 | TIAR_MOUSE  | 0.00000 | 0.00000 | 0.00000 | 0.00000 | 0.00000 | 0.00000 | 0.00093 | 0.00269 | 0.00219 | 0.00050 | 0.00162 | 0.00130 |
| P70333 | HNRH2_MOUSE | 0.00155 | 0.00148 | 0.00229 | 0.00234 | 0.00250 | 0.00271 | 0.01188 | 0.01814 | 0.00804 | 0.00669 | 0.00830 | 0.01427 |
| P70335 | ROCK1_MOUSE | 0.00000 | 0.00000 | 0.00000 | 0.00000 | 0.00000 | 0.00000 | 0.00805 | 0.01499 | 0.01462 | 0.01443 | 0.00879 | 0.01581 |
| P70336 | ROCK2_MOUSE | 0.00000 | 0.00000 | 0.00000 | 0.00000 | 0.00000 | 0.00000 | 0.02371 | 0.01687 | 0.02014 | 0.01891 | 0.01527 | 0.02050 |
| P70349 | HINT1_MOUSE | 0.00000 | 0.00000 | 0.00000 | 0.00000 | 0.00000 | 0.00000 | 0.02580 | 0.03855 | 0.01840 | 0.02313 | 0.02701 | 0.02289 |
| P70362 | UFD1_MOUSE  | 0.00000 | 0.00000 | 0.00000 | 0.00000 | 0.00000 | 0.00000 | 0.00914 | 0.00314 | 0.00599 | 0.00918 | 0.00691 | 0.00671 |
| P70372 | ELAV1_MOUSE | 0.00000 | 0.00000 | 0.00000 | 0.00000 | 0.00000 | 0.00000 | 0.01778 | 0.02207 | 0.02022 | 0.01884 | 0.01962 | 0.02097 |
| P70387 | HFE_MOUSE   | 0.00000 | 0.00000 | 0.00000 | 0.00000 | 0.00000 | 0.00000 | 0.00000 | 0.00061 | 0.00178 | 0.00000 | 0.00116 | 0.00000 |
| P70398 | USP9X_MOUSE | 0.00389 | 0.00539 | 0.00574 | 0.00288 | 0.00231 | 0.00146 | 0.00780 | 0.00437 | 0.00909 | 0.00622 | 0.00861 | 0.00656 |

|        |             |         |         |         |         |         |         |         |         |         |         |         |         |
|--------|-------------|---------|---------|---------|---------|---------|---------|---------|---------|---------|---------|---------|---------|
| P70402 | MYBPH_MOUSE | 0.00000 | 0.00000 | 0.00000 | 0.00000 | 0.00000 | 0.00000 | 0.00289 | 0.00000 | 0.00000 | 0.00000 | 0.00000 | 0.00000 |
| P70404 | IDHG1_MOUSE | 0.19891 | 0.09965 | 0.20284 | 0.20228 | 0.22053 | 0.11789 | 0.01671 | 0.01904 | 0.01098 | 0.01361 | 0.01178 | 0.01572 |
| P70414 | NAC1_MOUSE  | 0.00778 | 0.03474 | 0.01755 | 0.00863 | 0.01052 | 0.01200 | 0.00144 | 0.00000 | 0.00000 | 0.00114 | 0.00000 | 0.00050 |
| P70419 | GALT3_MOUSE | 0.00000 | 0.00000 | 0.00000 | 0.00000 | 0.00000 | 0.00000 | 0.00251 | 0.00000 | 0.00461 | 0.00170 | 0.00164 | 0.00000 |
| P70426 | RIT1_MOUSE  | 0.00000 | 0.00000 | 0.00000 | 0.00000 | 0.00000 | 0.00000 | 0.00000 | 0.00050 | 0.00086 | 0.00059 | 0.00109 | 0.00031 |
| P70429 | EVL_MOUSE   | 0.00000 | 0.00000 | 0.00000 | 0.00000 | 0.00000 | 0.00000 | 0.00000 | 0.00000 | 0.00052 | 0.00000 | 0.00000 | 0.00000 |
| P70441 | NHRF1_MOUSE | 0.00000 | 0.00000 | 0.00000 | 0.00000 | 0.00000 | 0.00000 | 0.00676 | 0.01569 | 0.01991 | 0.01817 | 0.01059 | 0.01148 |
| P70445 | 4EBP2_MOUSE | 0.00000 | 0.00000 | 0.00000 | 0.00000 | 0.00000 | 0.00000 | 0.00000 | 0.00000 | 0.00053 | 0.00026 | 0.00000 | 0.00000 |
| P70452 | STX4_MOUSE  | 0.00000 | 0.00000 | 0.00000 | 0.00000 | 0.00000 | 0.00000 | 0.00418 | 0.00404 | 0.00551 | 0.00360 | 0.00263 | 0.00668 |
| P70460 | VASP_MOUSE  | 0.00000 | 0.00000 | 0.00000 | 0.00000 | 0.00000 | 0.00000 | 0.00399 | 0.01041 | 0.01198 | 0.00920 | 0.01119 | 0.00994 |
| P70663 | SPRL1_MOUSE | 0.00000 | 0.00000 | 0.00000 | 0.00000 | 0.00000 | 0.00000 | 0.00669 | 0.00263 | 0.00807 | 0.00353 | 0.00901 | 0.00586 |
| P70670 | NACAM_MOUSE | 0.05058 | 0.08149 | 0.06417 | 0.07400 | 0.06104 | 0.05692 | 0.02082 | 0.04490 | 0.03393 | 0.04273 | 0.05015 | 0.03752 |
| P70671 | IRF3_MOUSE  | 0.00000 | 0.00000 | 0.00000 | 0.00000 | 0.00000 | 0.00000 | 0.00000 | 0.00074 | 0.00241 | 0.00116 | 0.00090 | 0.00078 |
| P70677 | CASP3_MOUSE | 0.00000 | 0.00000 | 0.00000 | 0.00000 | 0.00000 | 0.00000 | 0.00126 | 0.00082 | 0.00447 | 0.00347 | 0.00245 | 0.00232 |
| P70695 | F16P2_MOUSE | 0.00000 | 0.00000 | 0.00000 | 0.00000 | 0.00000 | 0.00000 | 0.00149 | 0.00000 | 0.00106 | 0.00193 | 0.00000 | 0.00187 |
| P70698 | PYRG1_MOUSE | 0.00000 | 0.00000 | 0.00000 | 0.00000 | 0.00000 | 0.00000 | 0.00369 | 0.01089 | 0.01052 | 0.00802 | 0.00148 | 0.00429 |
| P70699 | LYAG_MOUSE  | 0.00000 | 0.00000 | 0.00000 | 0.00000 | 0.00000 | 0.00000 | 0.00123 | 0.00427 | 0.00525 | 0.00273 | 0.00278 | 0.00189 |
| P70704 | AT8A1_MOUSE | 0.00000 | 0.00000 | 0.00000 | 0.00000 | 0.00000 | 0.00000 | 0.01067 | 0.01344 | 0.01699 | 0.01239 | 0.01221 | 0.01697 |
| P80313 | TCPH_MOUSE  | 0.01621 | 0.01252 | 0.01223 | 0.02304 | 0.01479 | 0.00937 | 0.04068 | 0.03205 | 0.04377 | 0.04033 | 0.04820 | 0.04404 |
| P80314 | TCPB_MOUSE  | 0.01078 | 0.00919 | 0.00772 | 0.01217 | 0.01140 | 0.01031 | 0.03233 | 0.03306 | 0.03912 | 0.03478 | 0.04414 | 0.03872 |
| P80315 | TCPD_MOUSE  | 0.01988 | 0.01018 | 0.01299 | 0.00704 | 0.00952 | 0.00717 | 0.02776 | 0.01674 | 0.02743 | 0.02792 | 0.02508 | 0.02845 |
| P80316 | TCPE_MOUSE  | 0.00195 | 0.00138 | 0.00313 | 0.00259 | 0.00336 | 0.00256 | 0.03321 | 0.02595 | 0.04901 | 0.03690 | 0.04739 | 0.04130 |
| P80317 | TCPZ_MOUSE  | 0.00307 | 0.00461 | 0.00529 | 0.00160 | 0.00349 | 0.00358 | 0.03098 | 0.02536 | 0.03344 | 0.03512 | 0.03634 | 0.03283 |
| P80318 | TCPG_MOUSE  | 0.00932 | 0.00667 | 0.00974 | 0.00716 | 0.00760 | 0.00601 | 0.02926 | 0.02465 | 0.03138 | 0.02670 | 0.03092 | 0.02840 |
| P81117 | NUCB2_MOUSE | 0.00000 | 0.00000 | 0.00000 | 0.00000 | 0.00000 | 0.00000 | 0.01270 | 0.00765 | 0.01651 | 0.01439 | 0.01615 | 0.01270 |
| P82198 | BGH3_MOUSE  | 0.00000 | 0.00094 | 0.00071 | 0.00114 | 0.00103 | 0.00122 | 0.02007 | 0.00461 | 0.01223 | 0.00577 | 0.00988 | 0.01095 |
| P82343 | RENBP_MOUSE | 0.00000 | 0.00000 | 0.00000 | 0.00000 | 0.00000 | 0.00000 | 0.00154 | 0.01345 | 0.00858 | 0.01061 | 0.01270 | 0.01156 |
| P82347 | SGCD_MOUSE  | 0.00982 | 0.01117 | 0.01206 | 0.01057 | 0.01287 | 0.00834 | 0.00765 | 0.00629 | 0.00238 | 0.00342 | 0.00115 | 0.00567 |
| P82349 | SGCB_MOUSE  | 0.00946 | 0.01327 | 0.00851 | 0.00917 | 0.01030 | 0.01177 | 0.00000 | 0.00000 | 0.00521 | 0.00200 | 0.00167 | 0.00421 |
| P83510 | TNIK_MOUSE  | 0.00000 | 0.00000 | 0.00000 | 0.00000 | 0.00000 | 0.00000 | 0.00000 | 0.00374 | 0.00485 | 0.00221 | 0.00093 | 0.00140 |
| P83741 | WNK1_MOUSE  | 0.00000 | 0.00000 | 0.00000 | 0.00000 | 0.00000 | 0.00000 | 0.00241 | 0.00662 | 0.00632 | 0.00673 | 0.00253 | 0.00330 |
| P83887 | TBG1_MOUSE  | 0.00000 | 0.00000 | 0.00000 | 0.00000 | 0.00000 | 0.00000 | 0.00135 | 0.00078 | 0.00205 | 0.00167 | 0.00318 | 0.00111 |
| P83917 | CBX1_MOUSE  | 0.00000 | 0.00000 | 0.00000 | 0.00000 | 0.00000 | 0.00000 | 0.00912 | 0.01392 | 0.01585 | 0.01167 | 0.01852 | 0.01689 |
| P83940 | ELOC_MOUSE  | 0.00000 | 0.00000 | 0.00000 | 0.00000 | 0.00000 | 0.00000 | 0.02690 | 0.02304 | 0.03372 | 0.03288 | 0.03253 | 0.02938 |

|        |             |         |         |         |         |         |         |         |         |         |         |         |         |
|--------|-------------|---------|---------|---------|---------|---------|---------|---------|---------|---------|---------|---------|---------|
| P84084 | ARF5_MOUSE  | 0.01033 | 0.00881 | 0.00761 | 0.00497 | 0.00976 | 0.00785 | 0.00000 | 0.00887 | 0.00994 | 0.01215 | 0.00528 | 0.01086 |
| P84089 | ERH_MOUSE   | 0.00000 | 0.00000 | 0.00000 | 0.00000 | 0.00000 | 0.00000 | 0.01730 | 0.01407 | 0.02121 | 0.02326 | 0.02079 | 0.00979 |
| P84091 | AP2M1_MOUSE | 0.00327 | 0.00586 | 0.00438 | 0.00632 | 0.00343 | 0.00749 | 0.01686 | 0.02492 | 0.02605 | 0.02147 | 0.01995 | 0.01820 |
| P84096 | RHOG_MOUSE  | 0.00000 | 0.00000 | 0.00000 | 0.00000 | 0.00000 | 0.00000 | 0.03507 | 0.03665 | 0.04092 | 0.03660 | 0.02651 | 0.03429 |
| P84099 | RL19_MOUSE  | 0.00000 | 0.00000 | 0.00000 | 0.00000 | 0.00000 | 0.00000 | 0.06163 | 0.06410 | 0.05854 | 0.06215 | 0.04715 | 0.06500 |
| P84104 | SRSF3_MOUSE | 0.00000 | 0.00000 | 0.00000 | 0.00000 | 0.00000 | 0.00000 | 0.00788 | 0.00467 | 0.00069 | 0.00306 | 0.00252 | 0.00572 |
| P85094 | ISC2A_MOUSE | 0.01166 | 0.01777 | 0.02752 | 0.01826 | 0.02938 | 0.01348 | 0.00000 | 0.00000 | 0.00000 | 0.00000 | 0.00000 | 0.00000 |
| Q3TL54 | TR43A_MOUSE | 0.00000 | 0.00000 | 0.00000 | 0.00000 | 0.00000 | 0.00000 | 0.01707 | 0.00000 | 0.00072 | 0.00000 | 0.00000 | 0.00000 |
| P97290 | IC1_MOUSE   | 0.00084 | 0.00035 | 0.00087 | 0.00140 | 0.00090 | 0.00019 | 0.00933 | 0.00938 | 0.02041 | 0.01906 | 0.02653 | 0.01305 |
| P97298 | PEDF_MOUSE  | 0.00000 | 0.00000 | 0.00000 | 0.00000 | 0.00000 | 0.00000 | 0.00218 | 0.00394 | 0.00351 | 0.00432 | 0.00594 | 0.00444 |
| P97300 | NPTN_MOUSE  | 0.00000 | 0.00000 | 0.00000 | 0.00000 | 0.00000 | 0.00000 | 0.08448 | 0.00824 | 0.01374 | 0.01013 | 0.00716 | 0.00736 |
| P97314 | CSRP2_MOUSE | 0.00000 | 0.00000 | 0.00000 | 0.00000 | 0.00000 | 0.00000 | 0.00128 | 0.00055 | 0.00485 | 0.00299 | 0.00159 | 0.00321 |
| P97315 | CSRP1_MOUSE | 0.00000 | 0.00000 | 0.00000 | 0.00000 | 0.00000 | 0.00000 | 0.10564 | 0.14548 | 0.14485 | 0.10878 | 0.11087 | 0.12717 |
| P97328 | KHK_MOUSE   | 0.00000 | 0.00000 | 0.00000 | 0.00000 | 0.00000 | 0.00000 | 0.00000 | 0.00000 | 0.00000 | 0.00000 | 0.00000 | 0.00000 |
| P97333 | NRP1_MOUSE  | 0.00042 | 0.00256 | 0.00019 | 0.00014 | 0.00030 | 0.00064 | 0.11353 | 0.15228 | 0.14580 | 0.12394 | 0.12743 | 0.14606 |
| P97347 | RPTN_MOUSE  | 0.00000 | 0.00000 | 0.00000 | 0.00000 | 0.00000 | 0.00000 | 0.00705 | 0.00000 | 0.00049 | 0.00000 | 0.00000 | 0.00000 |
| P97351 | RS3A_MOUSE  | 0.02183 | 0.03108 | 0.01993 | 0.01933 | 0.01640 | 0.01754 | 0.05678 | 0.06507 | 0.09244 | 0.06880 | 0.06373 | 0.07386 |
| P97352 | S10AD_MOUSE | 0.00000 | 0.00000 | 0.00000 | 0.00000 | 0.00000 | 0.00000 | 0.00876 | 0.00442 | 0.00962 | 0.00754 | 0.00747 | 0.00740 |
| P97355 | SPSY_MOUSE  | 0.00195 | 0.00831 | 0.00442 | 0.00338 | 0.00485 | 0.00450 | 0.00574 | 0.00777 | 0.00284 | 0.00306 | 0.00597 | 0.00533 |
| P97358 | TAF1B_MOUSE | 0.00000 | 0.00000 | 0.00000 | 0.00000 | 0.00000 | 0.00000 | 0.02888 | 0.03973 | 0.00896 | 0.01749 | 0.03259 | 0.01365 |
| P97363 | SPTC2_MOUSE | 0.00000 | 0.00000 | 0.00000 | 0.00000 | 0.00000 | 0.00000 | 0.01266 | 0.01067 | 0.01033 | 0.00910 | 0.00387 | 0.01527 |
| P97364 | SPS2_MOUSE  | 0.00000 | 0.00000 | 0.00000 | 0.00000 | 0.00000 | 0.00000 | 0.00020 | 0.00000 | 0.00000 | 0.00000 | 0.00000 | 0.00000 |
| P97370 | AT1B3_MOUSE | 0.00309 | 0.00655 | 0.00430 | 0.00131 | 0.00427 | 0.00746 | 0.04593 | 0.04271 | 0.04834 | 0.03527 | 0.04676 | 0.04419 |
| P97371 | PSME1_MOUSE | 0.00000 | 0.00000 | 0.00000 | 0.00000 | 0.00000 | 0.00000 | 0.04861 | 0.04906 | 0.06594 | 0.05828 | 0.06079 | 0.06136 |
| P97372 | PSME2_MOUSE | 0.00000 | 0.00000 | 0.00000 | 0.00000 | 0.00000 | 0.00000 | 0.02125 | 0.02173 | 0.04328 | 0.03143 | 0.03990 | 0.03029 |
| P97379 | G3BP2_MOUSE | 0.00000 | 0.00000 | 0.00000 | 0.00000 | 0.00000 | 0.00000 | 0.00565 | 0.00301 | 0.00729 | 0.00497 | 0.00668 | 0.00557 |
| P97384 | ANX11_MOUSE | 0.01366 | 0.02692 | 0.00940 | 0.01488 | 0.01152 | 0.01256 | 0.11319 | 0.12496 | 0.10994 | 0.10689 | 0.10670 | 0.11931 |
| P97390 | VPS45_MOUSE | 0.00000 | 0.00000 | 0.00000 | 0.00000 | 0.00000 | 0.00000 | 0.00582 | 0.00326 | 0.00599 | 0.00512 | 0.00469 | 0.00312 |
| P97426 | ECP1_MOUSE  | 0.00000 | 0.00000 | 0.00000 | 0.00000 | 0.00000 | 0.00000 | 0.00247 | 0.01574 | 0.00991 | 0.01802 | 0.03259 | 0.07594 |
| P97429 | ANXA4_MOUSE | 0.01172 | 0.01492 | 0.01712 | 0.01012 | 0.01371 | 0.01696 | 0.06604 | 0.07407 | 0.10171 | 0.09460 | 0.08680 | 0.08151 |
| P97434 | MPRIP_MOUSE | 0.00000 | 0.00000 | 0.00000 | 0.00000 | 0.00000 | 0.00000 | 0.02761 | 0.02882 | 0.03360 | 0.02855 | 0.02883 | 0.03271 |
| P97443 | SMYD1_MOUSE | 0.06670 | 0.08141 | 0.06565 | 0.04923 | 0.05493 | 0.06992 | 0.36376 | 0.03635 | 0.01843 | 0.03906 | 0.00659 | 0.00619 |
| P97447 | FHL1_MOUSE  | 0.00000 | 0.00000 | 0.00000 | 0.00000 | 0.00000 | 0.00000 | 0.11490 | 0.23656 | 0.14440 | 0.16947 | 0.05000 | 0.20022 |
| P97449 | AMPN_MOUSE  | 0.00071 | 0.00168 | 0.00144 | 0.00129 | 0.00179 | 0.00155 | 0.00501 | 0.00694 | 0.01160 | 0.00559 | 0.00976 | 0.00763 |

|        |             |         |         |         |         |         |         |         |         |         |         |         |         |
|--------|-------------|---------|---------|---------|---------|---------|---------|---------|---------|---------|---------|---------|---------|
| P97450 | ATP5J_MOUSE | 0.21197 | 0.14007 | 0.12494 | 0.13042 | 0.13032 | 0.07486 | 0.01084 | 0.01545 | 0.01471 | 0.01296 | 0.01017 | 0.01446 |
| P97457 | MLRS_MOUSE  | 0.00000 | 0.00000 | 0.00000 | 0.00000 | 0.00000 | 0.00000 | 0.06783 | 0.00038 | 0.00026 | 0.00027 | 0.00014 | 0.00017 |
| P97461 | RS5_MOUSE   | 0.00000 | 0.00000 | 0.00000 | 0.00000 | 0.00000 | 0.00000 | 0.07522 | 0.05733 | 0.05783 | 0.06806 | 0.05348 | 0.06791 |
| P97468 | CML1_MOUSE  | 0.00000 | 0.00000 | 0.00000 | 0.00000 | 0.00000 | 0.00000 | 0.00000 | 0.00160 | 0.00646 | 0.00400 | 0.00396 | 0.00000 |
| P97470 | PP4C_MOUSE  | 0.00000 | 0.00000 | 0.00000 | 0.00000 | 0.00000 | 0.00000 | 0.00218 | 0.00789 | 0.00450 | 0.00447 | 0.00585 | 0.00602 |
| P97471 | SMAD4_MOUSE | 0.00000 | 0.00000 | 0.00000 | 0.00000 | 0.00000 | 0.00000 | 0.00080 | 0.00000 | 0.00066 | 0.00000 | 0.00373 | 0.00178 |
| P97478 | COQ7_MOUSE  | 0.00442 | 0.00282 | 0.00181 | 0.00291 | 0.00189 | 0.00287 | 0.00000 | 0.00054 | 0.00000 | 0.00000 | 0.00000 | 0.00000 |
| P97493 | THIOM_MOUSE | 0.00000 | 0.00000 | 0.00000 | 0.00000 | 0.00000 | 0.00000 | 0.00309 | 0.00422 | 0.00228 | 0.00249 | 0.00043 | 0.00340 |
| P97494 | GSH1_MOUSE  | 0.00000 | 0.00000 | 0.00000 | 0.00000 | 0.00000 | 0.00000 | 0.01956 | 0.01656 | 0.02520 | 0.02734 | 0.02540 | 0.02115 |
| P97501 | FMO3_MOUSE  | 0.00000 | 0.00000 | 0.00000 | 0.00000 | 0.00000 | 0.00000 | 0.01547 | 0.02286 | 0.00328 | 0.00867 | 0.01582 | 0.02085 |
| P97742 | CPT1A_MOUSE | 0.00000 | 0.00000 | 0.00000 | 0.00000 | 0.00000 | 0.00000 | 0.02144 | 0.01641 | 0.02703 | 0.02414 | 0.02407 | 0.02457 |
| P97760 | RPB3_MOUSE  | 0.00000 | 0.00000 | 0.00000 | 0.00000 | 0.00000 | 0.00000 | 0.01233 | 0.01130 | 0.00842 | 0.01269 | 0.01410 | 0.01388 |
| P97792 | CXAR_MOUSE  | 0.00000 | 0.00000 | 0.00000 | 0.00000 | 0.00000 | 0.00000 | 0.01061 | 0.01494 | 0.01051 | 0.00863 | 0.01170 | 0.01471 |
| P97797 | SHPS1_MOUSE | 0.00000 | 0.00000 | 0.00000 | 0.00000 | 0.00000 | 0.00000 | 0.00000 | 0.00036 | 0.00224 | 0.00000 | 0.00070 | 0.00070 |
| P97807 | FUMH_MOUSE  | 0.38001 | 0.22687 | 0.30806 | 0.34434 | 0.34046 | 0.32135 | 0.05689 | 0.06036 | 0.03762 | 0.04465 | 0.04421 | 0.04730 |
| P97816 | S100G_MOUSE | 0.00000 | 0.00000 | 0.00000 | 0.00000 | 0.00000 | 0.00000 | 0.00131 | 0.00000 | 0.00000 | 0.00000 | 0.00000 | 0.00000 |
| P97821 | CATC_MOUSE  | 0.00000 | 0.00000 | 0.00000 | 0.00000 | 0.00000 | 0.00000 | 0.01024 | 0.00709 | 0.00835 | 0.00834 | 0.00649 | 0.00921 |
| P97822 | AN32E_MOUSE | 0.00000 | 0.00000 | 0.00000 | 0.00000 | 0.00000 | 0.00000 | 0.02538 | 0.01147 | 0.01988 | 0.01769 | 0.02698 | 0.01764 |
| P97823 | LYPA1_MOUSE | 0.00087 | 0.00072 | 0.00141 | 0.00039 | 0.00119 | 0.00073 | 0.00276 | 0.00925 | 0.00214 | 0.00415 | 0.00143 | 0.00813 |
| P97855 | G3BP1_MOUSE | 0.00583 | 0.00355 | 0.00441 | 0.00424 | 0.00427 | 0.00480 | 0.01314 | 0.00755 | 0.01586 | 0.01161 | 0.01555 | 0.01504 |
| P97858 | S35B1_MOUSE | 0.00000 | 0.00000 | 0.00000 | 0.00000 | 0.00000 | 0.00000 | 0.00000 | 0.00507 | 0.00381 | 0.00250 | 0.00256 | 0.00282 |
| P97863 | NFIB_MOUSE  | 0.00000 | 0.00000 | 0.00000 | 0.00000 | 0.00000 | 0.00000 | 0.00335 | 0.00382 | 0.00160 | 0.00174 | 0.00129 | 0.00399 |
| P97864 | CASP7_MOUSE | 0.00000 | 0.00000 | 0.00000 | 0.00000 | 0.00000 | 0.00000 | 0.00000 | 0.00071 | 0.00141 | 0.00282 | 0.00146 | 0.00321 |
| P97872 | FMO5_MOUSE  | 0.00000 | 0.00000 | 0.00000 | 0.00000 | 0.00000 | 0.00000 | 0.03925 | 0.04067 | 0.03647 | 0.03082 | 0.04228 | 0.03682 |
| P97873 | LOXL1_MOUSE | 0.00000 | 0.00000 | 0.00000 | 0.00000 | 0.00000 | 0.00000 | 0.05505 | 0.04464 | 0.02805 | 0.00836 | 0.04998 | 0.04502 |
| P97927 | LAMA4_MOUSE | 0.00767 | 0.02150 | 0.00645 | 0.00793 | 0.00688 | 0.00794 | 0.04162 | 0.02972 | 0.03881 | 0.03168 | 0.04593 | 0.03733 |
| P98078 | DAB2_MOUSE  | 0.00000 | 0.00000 | 0.00000 | 0.00000 | 0.00000 | 0.00000 | 0.00802 | 0.00560 | 0.00437 | 0.00379 | 0.00449 | 0.00460 |
| P98083 | SHC1_MOUSE  | 0.00000 | 0.00000 | 0.00000 | 0.00000 | 0.00000 | 0.00000 | 0.00218 | 0.00357 | 0.00000 | 0.00000 | 0.00000 | 0.00000 |
| P98192 | GNPAT_MOUSE | 0.00198 | 0.00237 | 0.00435 | 0.00400 | 0.00369 | 0.00355 | 0.00000 | 0.00000 | 0.00039 | 0.00086 | 0.00040 | 0.00078 |
| P98197 | AT11A_MOUSE | 0.00000 | 0.00000 | 0.00000 | 0.00000 | 0.00000 | 0.00000 | 0.00013 | 0.00081 | 0.00024 | 0.00015 | 0.00114 | 0.00013 |
| P99024 | TBB5_MOUSE  | 0.02206 | 0.02203 | 0.01388 | 0.01522 | 0.00829 | 0.01723 | 0.17998 | 0.24189 | 0.19673 | 0.23636 | 0.20276 | 0.25305 |
| P99026 | PSB4_MOUSE  | 0.00000 | 0.00000 | 0.00000 | 0.00000 | 0.00000 | 0.00000 | 0.03071 | 0.03835 | 0.02441 | 0.03097 | 0.03151 | 0.03367 |
| P99027 | RLA2_MOUSE  | 0.00000 | 0.00000 | 0.00000 | 0.00000 | 0.00000 | 0.00000 | 0.07619 | 0.06713 | 0.07212 | 0.07247 | 0.07796 | 0.07681 |
| P99028 | QCR6_MOUSE  | 0.00000 | 0.00000 | 0.00000 | 0.00000 | 0.00000 | 0.00000 | 0.01256 | 0.01298 | 0.00000 | 0.01402 | 0.00000 | 0.00863 |



|        |             |         |         |         |         |         |         |         |         |         |         |         |         |
|--------|-------------|---------|---------|---------|---------|---------|---------|---------|---------|---------|---------|---------|---------|
| P99029 | PRDX5_MOUSE | 0.05485 | 0.08468 | 0.07498 | 0.11113 | 0.04223 | 0.13803 | 0.03536 | 0.03590 | 0.02794 | 0.03117 | 0.03027 | 0.03666 |
| Q00262 | STX2_MOUSE  | 0.00000 | 0.00000 | 0.00000 | 0.00000 | 0.00000 | 0.00000 | 0.00000 | 0.00324 | 0.00334 | 0.00182 | 0.00250 | 0.00080 |
| Q00519 | XDH_MOUSE   | 0.00272 | 0.00563 | 0.00358 | 0.00455 | 0.00370 | 0.00381 | 0.08879 | 0.08061 | 0.09095 | 0.07752 | 0.08313 | 0.09394 |
| Q00560 | IL6RB_MOUSE | 0.00000 | 0.00000 | 0.00000 | 0.00000 | 0.00000 | 0.00000 | 0.00113 | 0.00191 | 0.00085 | 0.00119 | 0.00375 | 0.00129 |
| Q00612 | G6PD1_MOUSE | 0.00059 | 0.00123 | 0.00089 | 0.00204 | 0.00072 | 0.00110 | 0.03520 | 0.02846 | 0.02926 | 0.02873 | 0.02544 | 0.03013 |
| Q00623 | APOA1_MOUSE | 0.00000 | 0.00000 | 0.00000 | 0.00000 | 0.00000 | 0.00000 | 0.04545 | 0.03628 | 0.05868 | 0.09091 | 0.10111 | 0.02626 |
| Q00724 | RET4_MOUSE  | 0.00000 | 0.00000 | 0.00000 | 0.00000 | 0.00000 | 0.00000 | 0.00000 | 0.00000 | 0.00104 | 0.00000 | 0.00000 | 0.00038 |
| Q00896 | A1AT3_MOUSE | 0.00000 | 0.00000 | 0.00000 | 0.00000 | 0.00000 | 0.00000 | 0.48536 | 0.30922 | 0.40139 | 0.39919 | 0.60874 | 0.26401 |
| Q00897 | A1AT4_MOUSE | 0.00462 | 0.00324 | 0.00331 | 0.00413 | 0.00464 | 0.00531 | 0.04753 | 0.06786 | 0.08731 | 0.07238 | 0.06489 | 0.07694 |
| Q00898 | A1AT5_MOUSE | 0.00229 | 0.00497 | 0.00186 | 0.00286 | 0.00167 | 0.00311 | 0.13756 | 0.15381 | 0.20509 | 0.03914 | 0.15085 | 0.03032 |
| Q00899 | TYY1_MOUSE  | 0.00000 | 0.00000 | 0.00000 | 0.00000 | 0.00000 | 0.00000 | 0.00386 | 0.00183 | 0.00000 | 0.00156 | 0.00291 | 0.00259 |
| Q00915 | RET1_MOUSE  | 0.00000 | 0.00000 | 0.00000 | 0.00000 | 0.00000 | 0.00000 | 0.02641 | 0.02225 | 0.02977 | 0.02741 | 0.02114 | 0.02693 |
| Q00PI9 | HNRL2_MOUSE | 0.00506 | 0.00540 | 0.00421 | 0.00438 | 0.00411 | 0.00426 | 0.01437 | 0.01550 | 0.02210 | 0.01648 | 0.02169 | 0.02291 |
| Q01147 | CREB1_MOUSE | 0.00000 | 0.00000 | 0.00000 | 0.00000 | 0.00000 | 0.00000 | 0.00309 | 0.00000 | 0.00000 | 0.00226 | 0.00000 | 0.00000 |
| Q01149 | CO1A2_MOUSE | 0.00000 | 0.00000 | 0.00000 | 0.00000 | 0.00000 | 0.00000 | 0.08231 | 0.14262 | 0.08853 | 0.05062 | 0.08223 | 0.02876 |
| Q01279 | EGFR_MOUSE  | 0.00000 | 0.00000 | 0.00000 | 0.00000 | 0.00000 | 0.00000 | 0.00313 | 0.00324 | 0.00384 | 0.00161 | 0.00499 | 0.00127 |
| Q01405 | SC23A_MOUSE | 0.00409 | 0.00265 | 0.00603 | 0.00206 | 0.00334 | 0.00669 | 0.01264 | 0.00941 | 0.01156 | 0.01002 | 0.01180 | 0.01177 |
| Q01730 | RSU1_MOUSE  | 0.00607 | 0.00451 | 0.00616 | 0.00188 | 0.00603 | 0.00418 | 0.11867 | 0.08363 | 0.06957 | 0.09641 | 0.09979 | 0.11318 |
| Q01768 | NDKB_MOUSE  | 0.02589 | 0.02414 | 0.02716 | 0.04151 | 0.03427 | 0.01051 | 0.09586 | 0.10401 | 0.11313 | 0.11179 | 0.08175 | 0.07155 |
| Q01853 | TERA_MOUSE  | 0.15036 | 0.12577 | 0.14433 | 0.09980 | 0.15491 | 0.12519 | 0.06795 | 0.08049 | 0.09052 | 0.09062 | 0.08660 | 0.09198 |
| Q02013 | AQP1_MOUSE  | 0.00000 | 0.00000 | 0.00000 | 0.00000 | 0.00000 | 0.00000 | 0.29441 | 0.29948 | 0.25204 | 0.31406 | 0.24387 | 0.31583 |
| Q02053 | UBA1_MOUSE  | 0.11904 | 0.11644 | 0.10113 | 0.09477 | 0.09431 | 0.07838 | 0.06232 | 0.05481 | 0.07374 | 0.06678 | 0.06994 | 0.06749 |
| Q02248 | CTNB1_MOUSE | 0.00260 | 0.00301 | 0.00104 | 0.00245 | 0.00128 | 0.00173 | 0.02693 | 0.03648 | 0.04838 | 0.03514 | 0.04808 | 0.04405 |
| Q02257 | PLAK_MOUSE  | 0.00470 | 0.00853 | 0.00725 | 0.01043 | 0.01101 | 0.00980 | 0.00744 | 0.02038 | 0.01767 | 0.01971 | 0.01954 | 0.01893 |
| Q02357 | ANK1_MOUSE  | 0.00131 | 0.00106 | 0.00091 | 0.01042 | 0.00197 | 0.00137 | 0.01178 | 0.00085 | 0.00462 | 0.01401 | 0.02666 | 0.00089 |
| Q02566 | MYH6_MOUSE  | 7.58049 | 7.92201 | 7.09070 | 7.45486 | 7.29235 | 7.55283 | 0.38773 | 0.32159 | 0.37635 | 0.46589 | 0.38222 | 0.31019 |
| Q02788 | CO6A2_MOUSE | 0.04524 | 0.05979 | 0.02329 | 0.04837 | 0.03030 | 0.02972 | 0.08781 | 0.07375 | 0.07252 | 0.04652 | 0.06795 | 0.06596 |
| Q02819 | NUCB1_MOUSE | 0.00000 | 0.00000 | 0.00000 | 0.00000 | 0.00000 | 0.00000 | 0.02663 | 0.02510 | 0.03475 | 0.03339 | 0.04063 | 0.02929 |
| Q02858 | TIE2_MOUSE  | 0.00000 | 0.00000 | 0.00000 | 0.00000 | 0.00000 | 0.00000 | 0.00174 | 0.00000 | 0.00142 | 0.00040 | 0.00242 | 0.00356 |
| Q02956 | KPCZ_MOUSE  | 0.00000 | 0.00000 | 0.00000 | 0.00000 | 0.00000 | 0.00000 | 0.00896 | 0.00686 | 0.00881 | 0.00682 | 0.00841 | 0.00809 |
| Q03249 | GALT_MOUSE  | 0.00000 | 0.00000 | 0.00000 | 0.00000 | 0.00000 | 0.00000 | 0.00000 | 0.00223 | 0.00190 | 0.00184 | 0.00258 | 0.00312 |
| Q03265 | ATPA_MOUSE  | 2.72824 | 3.07081 | 2.10549 | 2.72402 | 2.43569 | 3.27114 | 0.26160 | 0.23646 | 0.17410 | 0.22481 | 0.19741 | 0.23994 |
| Q03734 | SPA3M_MOUSE | 0.00025 | 0.00062 | 0.00019 | 0.00036 | 0.00031 | 0.00000 | 0.00293 | 0.00175 | 0.00606 | 0.00629 | 0.00780 | 0.00535 |
| Q03958 | PFD6_MOUSE  | 0.00000 | 0.00000 | 0.00000 | 0.00000 | 0.00000 | 0.00000 | 0.00151 | 0.00000 | 0.00000 | 0.00000 | 0.00000 | 0.00000 |

|        |             |         |         |         |         |         |         |         |         |         |         |         |         |
|--------|-------------|---------|---------|---------|---------|---------|---------|---------|---------|---------|---------|---------|---------|
| Q04207 | TF65_MOUSE  | 0.00000 | 0.00000 | 0.00000 | 0.00000 | 0.00000 | 0.00000 | 0.00000 | 0.00472 | 0.00485 | 0.00424 | 0.00554 | 0.00674 |
| Q04447 | KCRB_MOUSE  | 0.05492 | 0.04763 | 0.07248 | 0.05683 | 0.05935 | 0.05273 | 0.05887 | 0.06655 | 0.08069 | 0.07742 | 0.07714 | 0.06955 |
| Q04646 | ATNG_MOUSE  | 0.00000 | 0.00000 | 0.00000 | 0.00000 | 0.00000 | 0.00000 | 0.00276 | 0.00000 | 0.00000 | 0.00000 | 0.00117 | 0.00385 |
| Q04690 | NF1_MOUSE   | 0.00000 | 0.00000 | 0.00000 | 0.00000 | 0.00000 | 0.00000 | 0.00641 | 0.01461 | 0.00820 | 0.00387 | 0.00388 | 0.03622 |
| Q04736 | YES_MOUSE   | 0.00000 | 0.00000 | 0.00000 | 0.00000 | 0.00000 | 0.00000 | 0.00313 | 0.00922 | 0.02005 | 0.01007 | 0.02713 | 0.01752 |
| Q04750 | TOP1_MOUSE  | 0.00000 | 0.00000 | 0.00000 | 0.00000 | 0.00000 | 0.00000 | 0.00095 | 0.00473 | 0.00541 | 0.00421 | 0.00420 | 0.00482 |
| Q04857 | CO6A1_MOUSE | 0.13514 | 0.25153 | 0.18090 | 0.18048 | 0.12376 | 0.11213 | 0.22635 | 0.13170 | 0.13179 | 0.09783 | 0.13079 | 0.10458 |
| Q05144 | RAC2_MOUSE  | 0.00000 | 0.00000 | 0.00000 | 0.00000 | 0.00000 | 0.00000 | 0.00062 | 0.00169 | 0.00180 | 0.00196 | 0.00124 | 0.00670 |
| Q05186 | RCN1_MOUSE  | 0.00000 | 0.00000 | 0.00000 | 0.00000 | 0.00000 | 0.00000 | 0.00692 | 0.01398 | 0.02042 | 0.01972 | 0.02258 | 0.01937 |
| Q05306 | COAA1_MOUSE | 0.00000 | 0.00000 | 0.00000 | 0.00000 | 0.00000 | 0.00000 | 0.03892 | 0.00000 | 0.00033 | 0.00000 | 0.00554 | 0.00000 |
| Q05421 | CP2E1_MOUSE | 0.00000 | 0.00000 | 0.00000 | 0.00000 | 0.00000 | 0.00000 | 0.00000 | 0.00000 | 0.00043 | 0.00000 | 0.00000 | 0.00000 |
| Q05512 | MARK2_MOUSE | 0.00000 | 0.00000 | 0.00000 | 0.00000 | 0.00000 | 0.00000 | 0.00000 | 0.00088 | 0.00221 | 0.00110 | 0.00184 | 0.00066 |
| Q05793 | PGBM_MOUSE  | 0.07157 | 0.08459 | 0.07386 | 0.07776 | 0.06097 | 0.03312 | 0.12970 | 0.12121 | 0.11947 | 0.08285 | 0.17787 | 0.14350 |
| Q05816 | FABP5_MOUSE | 0.00779 | 0.00369 | 0.00485 | 0.00500 | 0.00580 | 0.00566 | 0.01394 | 0.01090 | 0.02267 | 0.01473 | 0.00713 | 0.00898 |
| Q05920 | PYC_MOUSE   | 0.03751 | 0.02528 | 0.03938 | 0.02710 | 0.03158 | 0.03000 | 0.04601 | 0.02936 | 0.03321 | 0.02325 | 0.02731 | 0.02620 |
| Q05BC3 | EMAL1_MOUSE | 0.00000 | 0.00000 | 0.00000 | 0.00000 | 0.00000 | 0.00000 | 0.00218 | 0.01315 | 0.01108 | 0.00955 | 0.00524 | 0.01040 |
| Q05D44 | IF2P_MOUSE  | 0.00000 | 0.00000 | 0.00000 | 0.00000 | 0.00000 | 0.00000 | 0.00000 | 0.00095 | 0.00568 | 0.00429 | 0.00291 | 0.00313 |
| Q06138 | CAB39_MOUSE | 0.00283 | 0.00073 | 0.00172 | 0.00206 | 0.00221 | 0.00178 | 0.02540 | 0.03488 | 0.02343 | 0.02502 | 0.02911 | 0.02774 |
| Q06185 | ATP5I_MOUSE | 0.00000 | 0.00000 | 0.00000 | 0.00000 | 0.00000 | 0.00000 | 0.07811 | 0.06215 | 0.05325 | 0.06115 | 0.03330 | 0.05213 |
| Q06318 | UTER_MOUSE  | 0.00000 | 0.00000 | 0.00000 | 0.00000 | 0.00000 | 0.00000 | 0.08933 | 0.06458 | 0.03823 | 0.03369 | 0.05459 | 0.05066 |
| Q06335 | APLP2_MOUSE | 0.00000 | 0.00000 | 0.00000 | 0.00000 | 0.00000 | 0.00000 | 0.00000 | 0.00000 | 0.00064 | 0.00000 | 0.00162 | 0.00151 |
| Q06770 | CBG_MOUSE   | 0.00143 | 0.00146 | 0.00059 | 0.00181 | 0.00161 | 0.00131 | 0.00206 | 0.00110 | 0.00578 | 0.01679 | 0.01368 | 0.00743 |
| Q06890 | CLUS_MOUSE  | 0.00774 | 0.00528 | 0.00571 | 0.00475 | 0.00583 | 0.00482 | 0.08051 | 0.07856 | 0.08303 | 0.07813 | 0.09780 | 0.08290 |
| Q07076 | ANXA7_MOUSE | 0.02112 | 0.01738 | 0.01532 | 0.01599 | 0.02197 | 0.02069 | 0.03682 | 0.06766 | 0.05227 | 0.05034 | 0.05552 | 0.04714 |
| Q07113 | MPRI_MOUSE  | 0.00000 | 0.00000 | 0.00000 | 0.00000 | 0.00000 | 0.00000 | 0.00214 | 0.00359 | 0.00074 | 0.00220 | 0.00000 | 0.00154 |
| Q07417 | ACADS_MOUSE | 0.02868 | 0.01865 | 0.05803 | 0.03535 | 0.03243 | 0.02368 | 0.01503 | 0.01497 | 0.01505 | 0.01211 | 0.00760 | 0.00815 |
| Q07456 | AMBP_MOUSE  | 0.00000 | 0.00000 | 0.00000 | 0.00000 | 0.00000 | 0.00000 | 0.00000 | 0.00764 | 0.00000 | 0.00000 | 0.00296 | 0.00000 |
| Q07797 | LG3BP_MOUSE | 0.00000 | 0.00000 | 0.00000 | 0.00000 | 0.00000 | 0.00000 | 0.00466 | 0.00453 | 0.00935 | 0.00680 | 0.00964 | 0.00462 |
| Q07813 | BAX_MOUSE   | 0.00000 | 0.00000 | 0.00000 | 0.00000 | 0.00000 | 0.00000 | 0.00423 | 0.01232 | 0.01277 | 0.01174 | 0.01096 | 0.01241 |
| Q08024 | PEBB_MOUSE  | 0.00000 | 0.00000 | 0.00000 | 0.00000 | 0.00000 | 0.00000 | 0.00000 | 0.00427 | 0.00102 | 0.00184 | 0.00000 | 0.00000 |
| Q08091 | CNN1_MOUSE  | 0.00000 | 0.00000 | 0.00000 | 0.00000 | 0.00000 | 0.00000 | 0.10321 | 0.07512 | 0.06679 | 0.05651 | 0.09707 | 0.06700 |
| Q08093 | CNN2_MOUSE  | 0.00000 | 0.00000 | 0.00000 | 0.00000 | 0.00000 | 0.00000 | 0.02572 | 0.01178 | 0.03442 | 0.02313 | 0.03292 | 0.03702 |
| Q08189 | TGM3_MOUSE  | 0.00000 | 0.00000 | 0.00000 | 0.00000 | 0.00000 | 0.00000 | 0.08895 | 0.00009 | 0.00011 | 0.00008 | 0.00005 | 0.00005 |
| Q08481 | PECA1_MOUSE | 0.00000 | 0.00000 | 0.00000 | 0.00000 | 0.00000 | 0.00000 | 0.02216 | 0.03224 | 0.04215 | 0.03165 | 0.04047 | 0.03812 |



|        |             |         |         |         |         |         |         |         |         |         |         |         |         |
|--------|-------------|---------|---------|---------|---------|---------|---------|---------|---------|---------|---------|---------|---------|
| Q08857 | CD36_MOUSE  | 0.08533 | 0.28514 | 0.19435 | 0.12813 | 0.25367 | 0.17451 | 0.09783 | 0.14440 | 0.11338 | 0.12856 | 0.14043 | 0.16604 |
| Q08879 | FBLN1_MOUSE | 0.00000 | 0.00000 | 0.00000 | 0.00000 | 0.00000 | 0.00000 | 0.00985 | 0.00548 | 0.00784 | 0.00603 | 0.00511 | 0.00600 |
| Q08943 | SSRP1_MOUSE | 0.00000 | 0.00000 | 0.00000 | 0.00000 | 0.00000 | 0.00000 | 0.00000 | 0.00811 | 0.00290 | 0.01063 | 0.00319 | 0.00000 |
| Q09014 | NCF1_MOUSE  | 0.00000 | 0.00000 | 0.00000 | 0.00000 | 0.00000 | 0.00000 | 0.00759 | 0.00274 | 0.00545 | 0.00524 | 0.00934 | 0.00553 |
| Q09324 | GCNT1_MOUSE | 0.00000 | 0.00000 | 0.00000 | 0.00000 | 0.00000 | 0.00000 | 0.00000 | 0.00000 | 0.00000 | 0.00000 | 0.00000 | 0.00000 |
| Q09PK2 | APRV1_MOUSE | 0.00000 | 0.00000 | 0.00000 | 0.00000 | 0.00000 | 0.00000 | 0.02573 | 0.00000 | 0.00020 | 0.00000 | 0.00036 | 0.00000 |
| Q0P557 | MIEAP_MOUSE | 0.00000 | 0.00000 | 0.00000 | 0.00000 | 0.00000 | 0.00000 | 0.00000 | 0.00277 | 0.00518 | 0.00392 | 0.00297 | 0.00219 |
| Q0P678 | ZCH18_MOUSE | 0.00000 | 0.00000 | 0.00000 | 0.00000 | 0.00000 | 0.00000 | 0.00000 | 0.00247 | 0.00230 | 0.00412 | 0.00000 | 0.00608 |
| Q0VGB7 | PP4R2_MOUSE | 0.00000 | 0.00000 | 0.00000 | 0.00000 | 0.00000 | 0.00000 | 0.00000 | 0.00106 | 0.00209 | 0.00309 | 0.00144 | 0.00000 |
| Q0VGY8 | TANC1_MOUSE | 0.00000 | 0.00000 | 0.00000 | 0.00000 | 0.00000 | 0.00000 | 0.00034 | 0.00072 | 0.00231 | 0.00082 | 0.00247 | 0.00131 |
| Q11011 | PSA_MOUSE   | 0.00293 | 0.00344 | 0.00496 | 0.00335 | 0.00329 | 0.00356 | 0.01329 | 0.01937 | 0.01854 | 0.01758 | 0.02152 | 0.01821 |
| Q11136 | PEPD_MOUSE  | 0.00000 | 0.00000 | 0.00000 | 0.00000 | 0.00000 | 0.00000 | 0.01054 | 0.00751 | 0.01382 | 0.01182 | 0.01641 | 0.01228 |
| Q14B46 | RTKN2_MOUSE | 0.00000 | 0.00000 | 0.00000 | 0.00000 | 0.00000 | 0.00000 | 0.00000 | 0.00000 | 0.00095 | 0.00000 | 0.00109 | 0.00000 |
| Q14C51 | PTCD3_MOUSE | 0.00174 | 0.00176 | 0.00342 | 0.00099 | 0.00298 | 0.00210 | 0.00998 | 0.00177 | 0.00445 | 0.00852 | 0.00937 | 0.00355 |
| Q1HFZ0 | NSUN2_MOUSE | 0.00000 | 0.00000 | 0.00000 | 0.00000 | 0.00000 | 0.00000 | 0.00558 | 0.00415 | 0.00180 | 0.00402 | 0.00000 | 0.00106 |
| Q1XH17 | TRI72_MOUSE | 0.10729 | 0.06693 | 0.15648 | 0.09718 | 0.11505 | 0.07894 | 0.00892 | 0.00085 | 0.00239 | 0.00146 | 0.00164 | 0.00071 |
| Q2KN98 | CYTA_MOUSE  | 0.00000 | 0.00000 | 0.00000 | 0.00000 | 0.00000 | 0.00000 | 0.00041 | 0.00322 | 0.00161 | 0.00072 | 0.00096 | 0.00167 |
| Q2TPA8 | HSDL2_MOUSE | 0.05308 | 0.05772 | 0.03879 | 0.03483 | 0.05239 | 0.05947 | 0.02109 | 0.01030 | 0.01401 | 0.01343 | 0.01265 | 0.01279 |
| Q2VPQ9 | EAF6_MOUSE  | 0.00000 | 0.00000 | 0.00000 | 0.00000 | 0.00000 | 0.00000 | 0.00132 | 0.00204 | 0.00153 | 0.00357 | 0.00217 | 0.00000 |
| Q31125 | S39A7_MOUSE | 0.00000 | 0.00000 | 0.00000 | 0.00000 | 0.00000 | 0.00000 | 0.00000 | 0.00299 | 0.00829 | 0.00594 | 0.00352 | 0.00259 |
| Q3B7Z2 | OSBP1_MOUSE | 0.00390 | 0.00325 | 0.00505 | 0.00339 | 0.00586 | 0.00474 | 0.00432 | 0.00630 | 0.00979 | 0.00424 | 0.00632 | 0.00548 |
| Q3SXD3 | HDCC2_MOUSE | 0.00000 | 0.00000 | 0.00000 | 0.00000 | 0.00000 | 0.00000 | 0.00127 | 0.00000 | 0.00307 | 0.00218 | 0.00475 | 0.00270 |
| Q3T9X0 | GTR9_MOUSE  | 0.00000 | 0.00000 | 0.00000 | 0.00000 | 0.00000 | 0.00000 | 0.00000 | 0.00000 | 0.00000 | 0.00000 | 0.00000 | 0.00000 |
| Q3TAS6 | EMC10_MOUSE | 0.00000 | 0.00000 | 0.00000 | 0.00000 | 0.00000 | 0.00000 | 0.00525 | 0.00608 | 0.00414 | 0.00503 | 0.00429 | 0.00557 |
| Q3TBD2 | HMHA1_MOUSE | 0.00000 | 0.00000 | 0.00000 | 0.00000 | 0.00000 | 0.00000 | 0.00000 | 0.00118 | 0.00366 | 0.00242 | 0.00244 | 0.00371 |
| Q3TBT3 | STING_MOUSE | 0.00000 | 0.00000 | 0.00000 | 0.00000 | 0.00000 | 0.00000 | 0.00422 | 0.00363 | 0.00000 | 0.00232 | 0.00272 | 0.00289 |
| Q3TC72 | FAHD2_MOUSE | 0.02430 | 0.01959 | 0.03422 | 0.02050 | 0.02121 | 0.02325 | 0.00138 | 0.00466 | 0.00427 | 0.00122 | 0.00011 | 0.00219 |
| Q3TC93 | H1BP3_MOUSE | 0.00000 | 0.00000 | 0.00000 | 0.00000 | 0.00000 | 0.00000 | 0.00124 | 0.00401 | 0.00282 | 0.00367 | 0.00603 | 0.00361 |
| Q3TCJ1 | ABRX2_MOUSE | 0.00000 | 0.00000 | 0.00000 | 0.00000 | 0.00000 | 0.00000 | 0.00033 | 0.00170 | 0.00552 | 0.00357 | 0.00235 | 0.00174 |
| Q3TCN2 | PLBL2_MOUSE | 0.00000 | 0.00000 | 0.00000 | 0.00000 | 0.00000 | 0.00000 | 0.00251 | 0.00242 | 0.00797 | 0.00207 | 0.00521 | 0.00492 |
| Q3TDN2 | FAF2_MOUSE  | 0.00000 | 0.00000 | 0.00000 | 0.00000 | 0.00000 | 0.00000 | 0.00415 | 0.00936 | 0.01049 | 0.01151 | 0.00799 | 0.00388 |
| Q3TDQ1 | STT3B_MOUSE | 0.00000 | 0.00000 | 0.00000 | 0.00000 | 0.00000 | 0.00000 | 0.02300 | 0.01512 | 0.02211 | 0.01863 | 0.01908 | 0.01583 |
| Q3TEA8 | HP1B3_MOUSE | 0.00134 | 0.00541 | 0.00395 | 0.00439 | 0.00365 | 0.00405 | 0.02960 | 0.03044 | 0.03728 | 0.03090 | 0.03809 | 0.03703 |
| Q3TFD2 | PCAT1_MOUSE | 0.00000 | 0.00000 | 0.00000 | 0.00000 | 0.00000 | 0.00000 | 0.00550 | 0.00586 | 0.00990 | 0.00774 | 0.00648 | 0.00783 |

|        |             |         |         |         |         |         |         |         |         |         |         |         |         |
|--------|-------------|---------|---------|---------|---------|---------|---------|---------|---------|---------|---------|---------|---------|
| Q3TGF2 | F107B_MOUSE | 0.00000 | 0.00000 | 0.00000 | 0.00000 | 0.00000 | 0.00000 | 0.00000 | 0.00086 | 0.00225 | 0.00265 | 0.00321 | 0.00252 |
| Q3THE2 | ML12B_MOUSE | 0.00000 | 0.00000 | 0.00000 | 0.00000 | 0.00000 | 0.00000 | 0.15319 | 0.20056 | 0.13838 | 0.17020 | 0.18358 | 0.19174 |
| Q3THF9 | CQ10B_MOUSE | 0.00000 | 0.00000 | 0.00000 | 0.00000 | 0.00000 | 0.00000 | 0.00222 | 0.00064 | 0.00053 | 0.00089 | 0.00000 | 0.00000 |
| Q3THG9 | AASD1_MOUSE | 0.00000 | 0.00000 | 0.00000 | 0.00000 | 0.00000 | 0.00000 | 0.00000 | 0.00000 | 0.00592 | 0.00444 | 0.00896 | 0.00337 |
| Q3THK3 | T2FA_MOUSE  | 0.00000 | 0.00000 | 0.00000 | 0.00000 | 0.00000 | 0.00000 | 0.00209 | 0.00123 | 0.00037 | 0.00120 | 0.00000 | 0.00196 |
| Q3THK7 | GUAA_MOUSE  | 0.00345 | 0.00263 | 0.00215 | 0.00210 | 0.00245 | 0.00301 | 0.00267 | 0.00910 | 0.00571 | 0.00474 | 0.00488 | 0.00535 |
| Q3THS6 | METK2_MOUSE | 0.00000 | 0.00000 | 0.00000 | 0.00000 | 0.00000 | 0.00000 | 0.01262 | 0.01187 | 0.01144 | 0.01335 | 0.01425 | 0.01308 |
| Q3TIR3 | RIC8A_MOUSE | 0.00000 | 0.00000 | 0.00000 | 0.00000 | 0.00000 | 0.00000 | 0.00000 | 0.00482 | 0.00533 | 0.00602 | 0.00307 | 0.00321 |
| Q3TIX9 | SNUT2_MOUSE | 0.00000 | 0.00000 | 0.00000 | 0.00000 | 0.00000 | 0.00000 | 0.00000 | 0.00119 | 0.00000 | 0.00230 | 0.00100 | 0.00131 |
| Q3TJ91 | L2GL2_MOUSE | 0.00000 | 0.00000 | 0.00000 | 0.00000 | 0.00000 | 0.00000 | 0.00422 | 0.00993 | 0.00511 | 0.00377 | 0.00454 | 0.00880 |
| Q3TJD7 | PDL17_MOUSE | 0.00000 | 0.00000 | 0.00000 | 0.00000 | 0.00000 | 0.00000 | 0.01854 | 0.00947 | 0.00674 | 0.00554 | 0.00973 | 0.00869 |
| Q3TJZ6 | FA98A_MOUSE | 0.00000 | 0.00000 | 0.00000 | 0.00000 | 0.00000 | 0.00000 | 0.00602 | 0.00492 | 0.00187 | 0.00420 | 0.00321 | 0.00402 |
| Q3TL44 | NLRX1_MOUSE | 0.00292 | 0.00237 | 0.00216 | 0.00199 | 0.00368 | 0.00264 | 0.00362 | 0.00060 | 0.00823 | 0.00563 | 0.00837 | 0.00465 |
| Q3TLH4 | PRC2C_MOUSE | 0.00000 | 0.00000 | 0.00000 | 0.00000 | 0.00000 | 0.00000 | 0.00148 | 0.00000 | 0.00327 | 0.00211 | 0.00142 | 0.00338 |
| Q3TLP5 | ECHD2_MOUSE | 0.00255 | 0.00312 | 0.00306 | 0.00271 | 0.00214 | 0.00369 | 0.00787 | 0.00435 | 0.00083 | 0.00000 | 0.00625 | 0.00527 |
| Q3TMH2 | SCRN3_MOUSE | 0.00000 | 0.00000 | 0.00000 | 0.00000 | 0.00000 | 0.00000 | 0.00855 | 0.00546 | 0.00564 | 0.00668 | 0.01024 | 0.00443 |
| Q3TMP8 | TM38A_MOUSE | 0.00000 | 0.00000 | 0.00000 | 0.00000 | 0.00000 | 0.00000 | 0.00326 | 0.00000 | 0.00000 | 0.00000 | 0.00000 | 0.00000 |
| Q3TNA1 | XYLB_MOUSE  | 0.00000 | 0.00000 | 0.00000 | 0.00000 | 0.00000 | 0.00000 | 0.00009 | 0.00000 | 0.00003 | 0.00000 | 0.00000 | 0.00000 |
| Q3TPX4 | EXOC5_MOUSE | 0.00000 | 0.00000 | 0.00000 | 0.00000 | 0.00000 | 0.00000 | 0.00588 | 0.00437 | 0.00199 | 0.00418 | 0.00426 | 0.00621 |
| Q3TUH1 | TAM41_MOUSE | 0.00000 | 0.00000 | 0.00000 | 0.00000 | 0.00000 | 0.00000 | 0.00000 | 0.00000 | 0.00000 | 0.00000 | 0.00000 | 0.00000 |
| Q3TW96 | UAP1L_MOUSE | 0.00000 | 0.00000 | 0.00000 | 0.00000 | 0.00000 | 0.00000 | 0.01797 | 0.02025 | 0.01893 | 0.01781 | 0.01709 | 0.01954 |
| Q3TWL2 | PP4P1_MOUSE | 0.00000 | 0.00000 | 0.00000 | 0.00000 | 0.00000 | 0.00000 | 0.00073 | 0.00463 | 0.00242 | 0.00103 | 0.00000 | 0.00265 |
| Q3TWW8 | SRSF6_MOUSE | 0.00000 | 0.00000 | 0.00000 | 0.00000 | 0.00000 | 0.00000 | 0.00000 | 0.00491 | 0.00759 | 0.00457 | 0.00293 | 0.00299 |
| Q3TXS7 | PSMD1_MOUSE | 0.01914 | 0.03884 | 0.01821 | 0.01711 | 0.02028 | 0.01316 | 0.01171 | 0.01396 | 0.01749 | 0.01482 | 0.02077 | 0.01415 |
| Q3TYS2 | CYBC1_MOUSE | 0.00000 | 0.00000 | 0.00000 | 0.00000 | 0.00000 | 0.00000 | 0.00162 | 0.00338 | 0.00372 | 0.00223 | 0.00143 | 0.00316 |
| Q3TZZ7 | ESYT2_MOUSE | 0.00062 | 0.00071 | 0.00086 | 0.00104 | 0.00117 | 0.00117 | 0.01015 | 0.02220 | 0.02207 | 0.01754 | 0.02260 | 0.02405 |
| Q3U0S6 | RAIN_MOUSE  | 0.00000 | 0.00000 | 0.00000 | 0.00000 | 0.00000 | 0.00000 | 0.00458 | 0.01050 | 0.01236 | 0.00960 | 0.01013 | 0.01195 |
| Q3U0V1 | FUBP2_MOUSE | 0.00000 | 0.00000 | 0.00000 | 0.00000 | 0.00000 | 0.00000 | 0.01902 | 0.01652 | 0.01933 | 0.01647 | 0.01660 | 0.01896 |
| Q3U0V2 | TRADD_MOUSE | 0.00000 | 0.00000 | 0.00000 | 0.00000 | 0.00000 | 0.00000 | 0.00590 | 0.00560 | 0.00841 | 0.00697 | 0.00433 | 0.00783 |
| Q3U186 | SYRM_MOUSE  | 0.00000 | 0.00000 | 0.00000 | 0.00000 | 0.00000 | 0.00000 | 0.00000 | 0.00000 | 0.00000 | 0.00000 | 0.00000 | 0.00000 |
| Q3U1F9 | PHAG1_MOUSE | 0.00000 | 0.00000 | 0.00000 | 0.00000 | 0.00000 | 0.00000 | 0.00408 | 0.00592 | 0.00646 | 0.00652 | 0.00752 | 0.00861 |
| Q3U1J4 | DDB1_MOUSE  | 0.00982 | 0.01219 | 0.00981 | 0.00801 | 0.00941 | 0.00674 | 0.01287 | 0.01550 | 0.01679 | 0.01542 | 0.01961 | 0.01517 |
| Q3U3V8 | XRRA1_MOUSE | 0.00000 | 0.00000 | 0.00000 | 0.00000 | 0.00000 | 0.00000 | 0.00273 | 0.02715 | 0.00421 | 0.00000 | 0.00052 | 0.01525 |
| Q3U4I7 | PYRD2_MOUSE | 0.00000 | 0.00000 | 0.00000 | 0.00000 | 0.00000 | 0.00000 | 0.00000 | 0.00405 | 0.00203 | 0.00000 | 0.00000 | 0.00171 |

|         |             |         |         |         |         |         |         |         |         |         |         |         |         |
|---------|-------------|---------|---------|---------|---------|---------|---------|---------|---------|---------|---------|---------|---------|
| Q3U5Q7  | CMPK2_MOUSE | 0.00000 | 0.00000 | 0.00000 | 0.00000 | 0.00000 | 0.00000 | 0.00117 | 0.00623 | 0.00460 | 0.00357 | 0.00392 | 0.00678 |
| Q3U7R1  | ESYT1_MOUSE | 0.00894 | 0.00818 | 0.00460 | 0.00645 | 0.00666 | 0.00743 | 0.03090 | 0.02351 | 0.04280 | 0.03526 | 0.04008 | 0.03540 |
| Q3U7U3  | FBX7_MOUSE  | 0.00000 | 0.00000 | 0.00000 | 0.00000 | 0.00000 | 0.00000 | 0.00000 | 0.00084 | 0.00309 | 0.00337 | 0.00593 | 0.00127 |
| Q3U962  | CO5A2_MOUSE | 0.00000 | 0.00000 | 0.00000 | 0.00000 | 0.00000 | 0.00000 | 0.01082 | 0.00031 | 0.00526 | 0.00280 | 0.00909 | 0.00573 |
| Q3U9G9  | LBR_MOUSE   | 0.00000 | 0.00000 | 0.00000 | 0.00000 | 0.00000 | 0.00000 | 0.01738 | 0.01597 | 0.01950 | 0.01624 | 0.02429 | 0.02010 |
| Q3UA37  | QRIC1_MOUSE | 0.00000 | 0.00000 | 0.00000 | 0.00000 | 0.00000 | 0.00000 | 0.00237 | 0.00125 | 0.00270 | 0.00261 | 0.00333 | 0.00322 |
| Q3UBX0  | TM109_MOUSE | 0.00000 | 0.00000 | 0.00000 | 0.00000 | 0.00000 | 0.00000 | 0.00673 | 0.01928 | 0.00827 | 0.00727 | 0.00313 | 0.01267 |
| Q3UDE2  | TTL12_MOUSE | 0.00000 | 0.00000 | 0.00000 | 0.00000 | 0.00000 | 0.00000 | 0.00277 | 0.00395 | 0.00929 | 0.00450 | 0.00659 | 0.00354 |
| Q3UE37  | UBE2Z_MOUSE | 0.00000 | 0.00000 | 0.00000 | 0.00000 | 0.00000 | 0.00000 | 0.00000 | 0.00253 | 0.00047 | 0.00140 | 0.00145 | 0.00105 |
| Q3UEB3  | PUF60_MOUSE | 0.00107 | 0.00077 | 0.00030 | 0.00149 | 0.00103 | 0.00102 | 0.01456 | 0.01173 | 0.02267 | 0.02084 | 0.02234 | 0.01823 |
| Q3UEG6  | AGT2_MOUSE  | 0.00000 | 0.00000 | 0.00000 | 0.00000 | 0.00000 | 0.00000 | 0.00011 | 0.00029 | 0.00038 | 0.00033 | 0.00031 | 0.00018 |
| Q3UFF7  | LYPL1_MOUSE | 0.00000 | 0.00000 | 0.00000 | 0.00000 | 0.00000 | 0.00000 | 0.00181 | 0.00030 | 0.00073 | 0.00069 | 0.00102 | 0.00000 |
| Q3U FK8 | FRMD8_MOUSE | 0.00000 | 0.00000 | 0.00000 | 0.00000 | 0.00000 | 0.00000 | 0.00313 | 0.00723 | 0.00543 | 0.00266 | 0.01430 | 0.00609 |
| Q9DA80  | RSH3B_MOUSE | 0.00000 | 0.00000 | 0.00000 | 0.00000 | 0.00000 | 0.00000 | 0.00000 | 0.00000 | 0.00000 | 0.00000 | 0.00000 | 0.00000 |
| Q3UGC7  | EI3JA_MOUSE | 0.00000 | 0.00000 | 0.00000 | 0.00000 | 0.00000 | 0.00000 | 0.00696 | 0.01511 | 0.01099 | 0.01295 | 0.01362 | 0.01546 |
| Q3UGR5  | HDHD2_MOUSE | 0.00083 | 0.00015 | 0.00150 | 0.00116 | 0.00082 | 0.00048 | 0.00698 | 0.00744 | 0.00972 | 0.00838 | 0.00863 | 0.00675 |
| Q3UH60  | DIP2B_MOUSE | 0.00000 | 0.00000 | 0.00000 | 0.00000 | 0.00000 | 0.00000 | 0.00592 | 0.00192 | 0.00000 | 0.00083 | 0.00095 | 0.00000 |
| Q3UH68  | LIMC1_MOUSE | 0.00843 | 0.00671 | 0.00863 | 0.00492 | 0.00682 | 0.00605 | 0.03927 | 0.04084 | 0.05116 | 0.05344 | 0.04882 | 0.04628 |
| Q3UHD6  | SNX27_MOUSE | 0.00164 | 0.00178 | 0.00151 | 0.00085 | 0.00128 | 0.00821 | 0.00000 | 0.00217 | 0.00198 | 0.00353 | 0.00326 | 0.00649 |
| Q3UHJ0  | AAK1_MOUSE  | 0.00000 | 0.00000 | 0.00000 | 0.00000 | 0.00000 | 0.00000 | 0.00025 | 0.00200 | 0.00246 | 0.00285 | 0.00174 | 0.00321 |
| Q3UHX2  | HAP28_MOUSE | 0.00000 | 0.00000 | 0.00000 | 0.00000 | 0.00000 | 0.00000 | 0.01118 | 0.01130 | 0.00710 | 0.01128 | 0.00927 | 0.01213 |
| Q3UIA2  | RHG17_MOUSE | 0.00000 | 0.00000 | 0.00000 | 0.00000 | 0.00000 | 0.00000 | 0.00277 | 0.00569 | 0.00752 | 0.00377 | 0.00469 | 0.00504 |
| Q3UIJ9  | MYZAP_MOUSE | 0.00132 | 0.00161 | 0.00118 | 0.00112 | 0.00077 | 0.00142 | 0.01172 | 0.01671 | 0.01120 | 0.01481 | 0.00834 | 0.01327 |
| Q3UIL6  | PKHA7_MOUSE | 0.00000 | 0.00000 | 0.00000 | 0.00000 | 0.00000 | 0.00000 | 0.00031 | 0.00045 | 0.00059 | 0.00026 | 0.00027 | 0.00000 |
| Q3UIR3  | DTX3L_MOUSE | 0.00000 | 0.00000 | 0.00000 | 0.00000 | 0.00000 | 0.00000 | 0.00000 | 0.00275 | 0.00344 | 0.00364 | 0.00170 | 0.00166 |
| Q3UIU2  | NDUB6_MOUSE | 0.00000 | 0.00000 | 0.00000 | 0.00000 | 0.00000 | 0.00000 | 0.02138 | 0.01507 | 0.01404 | 0.01478 | 0.01411 | 0.01632 |
| Q3UJB9  | EDC4_MOUSE  | 0.00000 | 0.00000 | 0.00000 | 0.00000 | 0.00000 | 0.00000 | 0.00032 | 0.00000 | 0.00199 | 0.00070 | 0.00161 | 0.00064 |
| Q3UJP5  | CH037_MOUSE | 0.00000 | 0.00000 | 0.00000 | 0.00000 | 0.00000 | 0.00000 | 0.00000 | 0.00000 | 0.00112 | 0.00013 | 0.00014 | 0.00000 |
| Q3UJU9  | RMD3_MOUSE  | 0.00000 | 0.00000 | 0.00000 | 0.00000 | 0.00000 | 0.00000 | 0.00311 | 0.00400 | 0.00340 | 0.00335 | 0.00000 | 0.00508 |
| Q3UKJ7  | SMU1_MOUSE  | 0.00000 | 0.00000 | 0.00000 | 0.00000 | 0.00000 | 0.00000 | 0.00703 | 0.00456 | 0.00691 | 0.00435 | 0.00461 | 0.00397 |
| Q3ULD5  | MCCB_MOUSE  | 0.03361 | 0.02803 | 0.04064 | 0.03130 | 0.03305 | 0.02811 | 0.01541 | 0.00903 | 0.01336 | 0.01020 | 0.01051 | 0.00927 |
| Q3ULJ0  | GPD1L_MOUSE | 0.00000 | 0.00000 | 0.00000 | 0.00000 | 0.00000 | 0.00000 | 0.00000 | 0.01221 | 0.01413 | 0.01165 | 0.00251 | 0.00680 |
| Q3ULW8  | PARP3_MOUSE | 0.00000 | 0.00000 | 0.00000 | 0.00000 | 0.00000 | 0.00000 | 0.00565 | 0.00346 | 0.00301 | 0.00353 | 0.00165 | 0.00493 |
| Q3UM45  | PP1R7_MOUSE | 0.00000 | 0.00000 | 0.00000 | 0.00000 | 0.00000 | 0.00000 | 0.02703 | 0.02047 | 0.02895 | 0.02488 | 0.03235 | 0.02762 |

|        |             |         |         |         |         |         |         |         |         |         |         |         |         |
|--------|-------------|---------|---------|---------|---------|---------|---------|---------|---------|---------|---------|---------|---------|
| Q9D3R6 | KATL2_MOUSE | 0.00000 | 0.00000 | 0.00000 | 0.00000 | 0.00000 | 0.00000 | 0.00693 | 0.01969 | 0.00336 | 0.00925 | 0.00000 | 0.00682 |
| Q3UMF0 | COBL1_MOUSE | 0.00000 | 0.00000 | 0.00000 | 0.00000 | 0.00000 | 0.00000 | 0.00000 | 0.00122 | 0.00330 | 0.00181 | 0.00092 | 0.00066 |
| Q3UMR5 | MCU_MOUSE   | 0.00000 | 0.00000 | 0.00000 | 0.00000 | 0.00000 | 0.00000 | 0.00522 | 0.00306 | 0.00633 | 0.00391 | 0.00728 | 0.00467 |
| Q3UMT1 | PP12C_MOUSE | 0.00000 | 0.00000 | 0.00000 | 0.00000 | 0.00000 | 0.00000 | 0.00000 | 0.00279 | 0.00514 | 0.00302 | 0.00261 | 0.00092 |
| Q3UMU9 | HDGR2_MOUSE | 0.00000 | 0.00000 | 0.00000 | 0.00000 | 0.00000 | 0.00000 | 0.00510 | 0.00276 | 0.00881 | 0.00465 | 0.00900 | 0.00497 |
| Q3UMY5 | EMAL4_MOUSE | 0.00000 | 0.00000 | 0.00000 | 0.00000 | 0.00000 | 0.00000 | 0.01380 | 0.01092 | 0.01572 | 0.01395 | 0.01548 | 0.01479 |
| Q3UNX5 | ACSM3_MOUSE | 0.00000 | 0.00000 | 0.00000 | 0.00000 | 0.00000 | 0.00000 | 0.00000 | 0.00001 | 0.00001 | 0.00000 | 0.00000 | 0.00002 |
| Q3UNZ8 | QORL2_MOUSE | 0.00000 | 0.00000 | 0.00000 | 0.00000 | 0.00000 | 0.00000 | 0.00067 | 0.00056 | 0.00063 | 0.00020 | 0.00063 | 0.00079 |
| Q3UP75 | UD3A1_MOUSE | 0.00000 | 0.00000 | 0.00000 | 0.00000 | 0.00000 | 0.00000 | 0.00451 | 0.00723 | 0.00233 | 0.00350 | 0.00275 | 0.00520 |
| Q3UP87 | ELNE_MOUSE  | 0.00000 | 0.00000 | 0.00000 | 0.00000 | 0.00000 | 0.00000 | 0.00000 | 0.00799 | 0.00306 | 0.00543 | 0.00519 | 0.00464 |
| Q3UPF5 | ZCCHV_MOUSE | 0.00000 | 0.00000 | 0.00000 | 0.00000 | 0.00000 | 0.00000 | 0.00336 | 0.00179 | 0.00261 | 0.00454 | 0.00102 | 0.00528 |
| Q3UPH1 | PRRC1_MOUSE | 0.00000 | 0.00000 | 0.00000 | 0.00000 | 0.00000 | 0.00000 | 0.00551 | 0.00513 | 0.00766 | 0.00502 | 0.00660 | 0.00681 |
| Q3UPL0 | SC31A_MOUSE | 0.00000 | 0.00000 | 0.00000 | 0.00000 | 0.00000 | 0.00000 | 0.01847 | 0.01535 | 0.01918 | 0.01609 | 0.01909 | 0.01682 |
| Q3UPY5 | GLBL2_MOUSE | 0.00000 | 0.00000 | 0.00000 | 0.00000 | 0.00000 | 0.00000 | 0.00000 | 0.00000 | 0.00000 | 0.00000 | 0.00000 | 0.00000 |
| Q3UQ28 | PXDN_MOUSE  | 0.00000 | 0.00000 | 0.00000 | 0.00000 | 0.00000 | 0.00000 | 0.00353 | 0.00245 | 0.00381 | 0.00140 | 0.00171 | 0.00265 |
| Q3UQ44 | IQGA2_MOUSE | 0.00000 | 0.00000 | 0.00000 | 0.00000 | 0.00000 | 0.00000 | 0.00326 | 0.00515 | 0.00268 | 0.00323 | 0.00000 | 0.00143 |
| Q3UQ84 | SYTM_MOUSE  | 0.00345 | 0.00236 | 0.00265 | 0.00347 | 0.00215 | 0.00251 | 0.00000 | 0.00000 | 0.00000 | 0.00000 | 0.00000 | 0.00000 |
| Q3UQN2 | FCHO2_MOUSE | 0.00000 | 0.00000 | 0.00000 | 0.00000 | 0.00000 | 0.00000 | 0.00242 | 0.00303 | 0.00591 | 0.00370 | 0.00533 | 0.00473 |
| Q3URD3 | SLMAP_MOUSE | 0.01443 | 0.01500 | 0.01721 | 0.01348 | 0.01728 | 0.01612 | 0.01435 | 0.00923 | 0.01180 | 0.01090 | 0.01249 | 0.01165 |
| Q3URE1 | ACSF3_MOUSE | 0.00873 | 0.02254 | 0.00843 | 0.00621 | 0.00562 | 0.00331 | 0.00120 | 0.00000 | 0.00138 | 0.00000 | 0.00180 | 0.00000 |
| Q3USB7 | PLCL1_MOUSE | 0.00000 | 0.00000 | 0.00000 | 0.00000 | 0.00000 | 0.00000 | 0.00000 | 0.00103 | 0.00000 | 0.00373 | 0.00000 | 0.00000 |
| Q3UUI3 | THEM4_MOUSE | 0.00000 | 0.00000 | 0.00000 | 0.00000 | 0.00000 | 0.00000 | 0.00000 | 0.00029 | 0.00012 | 0.00052 | 0.00123 | 0.00000 |
| Q3UV17 | K22O_MOUSE  | 0.00000 | 0.00000 | 0.00000 | 0.00000 | 0.00000 | 0.00000 | 0.00000 | 0.00603 | 0.00661 | 0.00494 | 0.00435 | 0.00376 |
| Q3UV70 | PDP1_MOUSE  | 0.00470 | 0.00324 | 0.00365 | 0.00281 | 0.00303 | 0.00145 | 0.00000 | 0.00000 | 0.00237 | 0.00168 | 0.00000 | 0.00090 |
| Q3UVK0 | ERMP1_MOUSE | 0.00000 | 0.00000 | 0.00000 | 0.00000 | 0.00000 | 0.00000 | 0.00000 | 0.00056 | 0.00051 | 0.00054 | 0.00030 | 0.00031 |
| Q3UVL4 | VPS51_MOUSE | 0.00000 | 0.00000 | 0.00000 | 0.00000 | 0.00000 | 0.00000 | 0.01961 | 0.01118 | 0.00831 | 0.02988 | 0.00893 | 0.00595 |
| Q3UW53 | NIBA1_MOUSE | 0.00000 | 0.00000 | 0.00000 | 0.00000 | 0.00000 | 0.00000 | 0.01221 | 0.01730 | 0.01758 | 0.01519 | 0.01656 | 0.01946 |
| Q3UX10 | TBAL3_MOUSE | 0.00000 | 0.00000 | 0.00000 | 0.00000 | 0.00000 | 0.00000 | 0.02132 | 0.01015 | 0.01887 | 0.01618 | 0.01586 | 0.02037 |
| Q3UYC0 | PPM1H_MOUSE | 0.00000 | 0.00000 | 0.00000 | 0.00000 | 0.00000 | 0.00000 | 0.00000 | 0.00000 | 0.00000 | 0.00000 | 0.00000 | 0.00000 |
| Q3UYV9 | NCBP1_MOUSE | 0.00000 | 0.00000 | 0.00000 | 0.00000 | 0.00000 | 0.00000 | 0.00139 | 0.00248 | 0.00263 | 0.00345 | 0.00394 | 0.00418 |
| Q3UZ39 | LRRF1_MOUSE | 0.00000 | 0.00000 | 0.00000 | 0.00000 | 0.00000 | 0.00000 | 0.00160 | 0.00889 | 0.01880 | 0.01416 | 0.00883 | 0.00839 |
| Q3UZA1 | CPZIP_MOUSE | 0.00000 | 0.00000 | 0.00000 | 0.00000 | 0.00000 | 0.00000 | 0.00257 | 0.00478 | 0.00704 | 0.00643 | 0.00322 | 0.00633 |
| Q3UZZ6 | ST1D1_MOUSE | 0.00000 | 0.00000 | 0.00000 | 0.00000 | 0.00000 | 0.00000 | 0.00177 | 0.00318 | 0.00068 | 0.00159 | 0.00105 | 0.00184 |
| Q3V0K9 | PLSI_MOUSE  | 0.00000 | 0.00000 | 0.00000 | 0.00000 | 0.00000 | 0.00000 | 0.00357 | 0.00239 | 0.00292 | 0.00458 | 0.00312 | 0.00296 |

|        |             |         |         |         |         |         |         |         |         |         |         |         |         |
|--------|-------------|---------|---------|---------|---------|---------|---------|---------|---------|---------|---------|---------|---------|
| Q3V1L4 | 5NTC_MOUSE  | 0.00040 | 0.00000 | 0.00129 | 0.00055 | 0.00113 | 0.00062 | 0.00040 | 0.00000 | 0.00116 | 0.00000 | 0.00078 | 0.00000 |
| Q3V384 | AFG1L_MOUSE | 0.00940 | 0.06520 | 0.01016 | 0.03811 | 0.00799 | 0.00917 | 0.00000 | 0.00191 | 0.00000 | 0.00000 | 0.00000 | 0.00000 |
| Q3V3R4 | ITA1_MOUSE  | 0.00036 | 0.00028 | 0.00081 | 0.00293 | 0.00082 | 0.00057 | 0.02281 | 0.03081 | 0.03326 | 0.03046 | 0.03018 | 0.02919 |
| Q49B93 | SC5AC_MOUSE | 0.00000 | 0.00000 | 0.00000 | 0.00000 | 0.00000 | 0.00000 | 0.00000 | 0.00000 | 0.00000 | 0.00000 | 0.00000 | 0.00000 |
| Q4ACU6 | SHAN3_MOUSE | 0.00000 | 0.00000 | 0.00000 | 0.00000 | 0.00000 | 0.00000 | 0.01015 | 0.00565 | 0.01081 | 0.00701 | 0.01255 | 0.00927 |
| Q4FZC9 | SYNE3_MOUSE | 0.00000 | 0.00000 | 0.00000 | 0.00000 | 0.00000 | 0.00000 | 0.03312 | 0.00000 | 0.03140 | 0.04167 | 0.07024 | 0.00808 |
| Q9WVA2 | TIM8A_MOUSE | 0.00000 | 0.00000 | 0.00000 | 0.00000 | 0.00000 | 0.00000 | 0.00264 | 0.00287 | 0.00084 | 0.00442 | 0.00115 | 0.00146 |
| Q4KML4 | ABRAL_MOUSE | 0.00000 | 0.00000 | 0.00000 | 0.00000 | 0.00000 | 0.00000 | 0.03112 | 0.02101 | 0.02204 | 0.02521 | 0.03160 | 0.02330 |
| Q4LDD4 | ARAP1_MOUSE | 0.00000 | 0.00000 | 0.00000 | 0.00000 | 0.00000 | 0.00000 | 0.02080 | 0.00572 | 0.01611 | 0.01247 | 0.01704 | 0.01808 |
| Q4PZA2 | ECE1_MOUSE  | 0.00000 | 0.00000 | 0.00000 | 0.00000 | 0.00000 | 0.00000 | 0.00472 | 0.01197 | 0.01485 | 0.01087 | 0.01482 | 0.01397 |
| Q4VA53 | PDS5B_MOUSE | 0.00000 | 0.00000 | 0.00000 | 0.00000 | 0.00000 | 0.00000 | 0.00150 | 0.00405 | 0.00777 | 0.00527 | 0.00531 | 0.00475 |
| Q4VAA2 | CDV3_MOUSE  | 0.00000 | 0.00000 | 0.00000 | 0.00000 | 0.00000 | 0.00000 | 0.00000 | 0.00080 | 0.00181 | 0.00259 | 0.00142 | 0.00110 |
| Q4VBD2 | TAPT1_MOUSE | 0.00000 | 0.00000 | 0.00000 | 0.00000 | 0.00000 | 0.00000 | 0.00000 | 0.00179 | 0.00000 | 0.00185 | 0.00000 | 0.00000 |
| Q501J6 | DDX17_MOUSE | 0.00000 | 0.00000 | 0.00000 | 0.00000 | 0.00000 | 0.00000 | 0.08837 | 0.11853 | 0.08101 | 0.09410 | 0.09750 | 0.12709 |
| Q501J7 | PHAR4_MOUSE | 0.00000 | 0.00000 | 0.00000 | 0.00000 | 0.00000 | 0.00000 | 0.00000 | 0.00000 | 0.00301 | 0.00139 | 0.00138 | 0.00106 |
| Q505B7 | ARCH_MOUSE  | 0.00000 | 0.00000 | 0.00000 | 0.00000 | 0.00000 | 0.00000 | 0.00254 | 0.00549 | 0.00338 | 0.00207 | 0.00256 | 0.00414 |
| Q505F5 | LRC47_MOUSE | 0.00000 | 0.00000 | 0.00000 | 0.00000 | 0.00000 | 0.00000 | 0.00685 | 0.00286 | 0.00535 | 0.00453 | 0.00348 | 0.00518 |
| Q52K18 | SRRM1_MOUSE | 0.00000 | 0.00000 | 0.00000 | 0.00000 | 0.00000 | 0.00000 | 0.00587 | 0.00662 | 0.00374 | 0.00688 | 0.00673 | 0.00833 |
| Q569Z5 | DDX46_MOUSE | 0.00000 | 0.00000 | 0.00000 | 0.00000 | 0.00000 | 0.00000 | 0.00407 | 0.01092 | 0.00620 | 0.01340 | 0.00000 | 0.00000 |
| Q569Z6 | TR150_MOUSE | 0.00000 | 0.00000 | 0.00000 | 0.00000 | 0.00000 | 0.00000 | 0.00000 | 0.00465 | 0.01245 | 0.00976 | 0.00447 | 0.00435 |
| Q570Y9 | DPTOR_MOUSE | 0.00000 | 0.00000 | 0.00000 | 0.00000 | 0.00000 | 0.00000 | 0.00370 | 0.00298 | 0.00466 | 0.00229 | 0.00404 | 0.00278 |
| Q571E4 | GALNS_MOUSE | 0.00000 | 0.00000 | 0.00000 | 0.00000 | 0.00000 | 0.00000 | 0.00378 | 0.00000 | 0.00239 | 0.00000 | 0.00000 | 0.00000 |
| Q571I9 | A16A1_MOUSE | 0.00000 | 0.00000 | 0.00000 | 0.00000 | 0.00000 | 0.00000 | 0.00000 | 0.00160 | 0.00154 | 0.00301 | 0.00102 | 0.00123 |
| Q58A65 | JIP4_MOUSE  | 0.00131 | 0.00093 | 0.00053 | 0.00113 | 0.00126 | 0.00224 | 0.00730 | 0.00943 | 0.01267 | 0.00713 | 0.00904 | 0.01070 |
| Q59J78 | NDUF2_MOUSE | 0.00389 | 0.00760 | 0.00914 | 0.00859 | 0.00774 | 0.01314 | 0.00257 | 0.00298 | 0.00286 | 0.00337 | 0.00000 | 0.00333 |
| Q5DTX6 | JCAD_MOUSE  | 0.00000 | 0.00000 | 0.00000 | 0.00000 | 0.00000 | 0.00000 | 0.00431 | 0.00536 | 0.00751 | 0.00664 | 0.00607 | 0.00679 |
| Q5EBG6 | HSPB6_MOUSE | 0.00054 | 0.00270 | 0.00359 | 0.00471 | 0.00164 | 0.00681 | 0.00305 | 0.00027 | 0.00056 | 0.00042 | 0.00000 | 0.00029 |
| Q5EG47 | AAPK1_MOUSE | 0.00000 | 0.00000 | 0.00000 | 0.00000 | 0.00000 | 0.00000 | 0.00467 | 0.01202 | 0.00687 | 0.00896 | 0.00999 | 0.00601 |
| Q5F201 | CFA52_MOUSE | 0.00000 | 0.00000 | 0.00000 | 0.00000 | 0.00000 | 0.00000 | 0.00241 | 0.00100 | 0.00186 | 0.00333 | 0.00242 | 0.00596 |
| Q5FW53 | MBPHL_MOUSE | 0.00000 | 0.00000 | 0.00000 | 0.00000 | 0.00000 | 0.00000 | 0.00000 | 0.00640 | 0.00841 | 0.01070 | 0.01365 | 0.01093 |
| Q5FW60 | MUP20_MOUSE | 0.00000 | 0.00000 | 0.00000 | 0.00000 | 0.00000 | 0.00000 | 0.00000 | 0.00000 | 0.00000 | 0.00000 | 0.00042 | 0.00000 |
| Q5FWI3 | CEIP2_MOUSE | 0.00000 | 0.00000 | 0.00000 | 0.00000 | 0.00000 | 0.00000 | 0.01848 | 0.02827 | 0.03571 | 0.02912 | 0.02900 | 0.02827 |
| Q5FWK3 | RHG01_MOUSE | 0.00000 | 0.00000 | 0.00000 | 0.00000 | 0.00000 | 0.00000 | 0.04844 | 0.07659 | 0.08041 | 0.07354 | 0.08228 | 0.07672 |
| Q5M8N0 | CNRP1_MOUSE | 0.00000 | 0.00000 | 0.00000 | 0.00000 | 0.00000 | 0.00000 | 0.04244 | 0.00821 | 0.01676 | 0.02043 | 0.00644 | 0.01758 |



|        |             |         |         |         |         |         |         |         |         |         |         |         |         |
|--------|-------------|---------|---------|---------|---------|---------|---------|---------|---------|---------|---------|---------|---------|
| Q5M8N4 | D39U1_MOUSE | 0.00853 | 0.00563 | 0.00793 | 0.00481 | 0.00480 | 0.01085 | 0.00000 | 0.00046 | 0.00095 | 0.00000 | 0.00000 | 0.00114 |
| Q5NCF2 | TPPC1_MOUSE | 0.00000 | 0.00000 | 0.00000 | 0.00000 | 0.00000 | 0.00000 | 0.00000 | 0.00083 | 0.00216 | 0.00161 | 0.00104 | 0.00119 |
| Q5RL79 | KTAP2_MOUSE | 0.00000 | 0.00000 | 0.00000 | 0.00000 | 0.00000 | 0.00000 | 0.00270 | 0.00593 | 0.00612 | 0.00651 | 0.00561 | 0.00618 |
| Q5SRX1 | TM1L2_MOUSE | 0.00050 | 0.00085 | 0.00073 | 0.00046 | 0.00075 | 0.00077 | 0.00488 | 0.00519 | 0.00833 | 0.00635 | 0.01423 | 0.00775 |
| Q5SS90 | CG057_MOUSE | 0.00000 | 0.00000 | 0.00000 | 0.00000 | 0.00000 | 0.00000 | 0.00198 | 0.00000 | 0.00000 | 0.00000 | 0.00000 | 0.00000 |
| Q5SSZ5 | TENS3_MOUSE | 0.00000 | 0.00000 | 0.00000 | 0.00000 | 0.00000 | 0.00000 | 0.00860 | 0.00712 | 0.01557 | 0.01140 | 0.02133 | 0.01532 |
| Q5SUF2 | LC7L3_MOUSE | 0.00000 | 0.00000 | 0.00000 | 0.00000 | 0.00000 | 0.00000 | 0.00000 | 0.00288 | 0.00442 | 0.00363 | 0.00216 | 0.00148 |
| Q5SUR0 | PUR4_MOUSE  | 0.00000 | 0.00000 | 0.00000 | 0.00000 | 0.00000 | 0.00000 | 0.00000 | 0.00228 | 0.00355 | 0.00573 | 0.00468 | 0.00071 |
| Q5SVR0 | TBC9B_MOUSE | 0.00000 | 0.00000 | 0.00000 | 0.00000 | 0.00000 | 0.00000 | 0.00276 | 0.00112 | 0.00381 | 0.00154 | 0.00324 | 0.00166 |
| Q5SW19 | CLU_MOUSE   | 0.00814 | 0.01154 | 0.00715 | 0.00844 | 0.01506 | 0.01205 | 0.00000 | 0.00000 | 0.00078 | 0.00000 | 0.00000 | 0.00000 |
| Q5SWT3 | S2535_MOUSE | 0.00000 | 0.00000 | 0.00000 | 0.00000 | 0.00000 | 0.00000 | 0.00562 | 0.00147 | 0.00461 | 0.00276 | 0.00361 | 0.00362 |
| Q5SWU9 | ACACA_MOUSE | 0.00000 | 0.00000 | 0.00000 | 0.00000 | 0.00000 | 0.00000 | 0.01569 | 0.00703 | 0.01545 | 0.00779 | 0.00768 | 0.00781 |
| Q5SWY8 | SC5AA_MOUSE | 0.00000 | 0.00000 | 0.00000 | 0.00000 | 0.00000 | 0.00000 | 0.00000 | 0.00000 | 0.00000 | 0.00000 | 0.00000 | 0.00000 |
| Q5SX39 | MYH4_MOUSE  | 0.00320 | 0.00297 | 0.00164 | 0.00291 | 0.00242 | 0.00308 | 0.07337 | 0.00016 | 0.00004 | 0.00005 | 0.00005 | 0.00013 |
| Q5SX40 | MYH1_MOUSE  | 0.00152 | 0.00120 | 0.00295 | 0.00104 | 0.00142 | 0.00247 | 0.82445 | 0.12195 | 0.09753 | 0.13099 | 0.09138 | 0.07809 |
| Q5SXY1 | CYTSB_MOUSE | 0.00000 | 0.00000 | 0.00000 | 0.00000 | 0.00000 | 0.00000 | 0.00000 | 0.00000 | 0.00000 | 0.00000 | 0.00000 | 0.00000 |
| Q5SYD0 | MYO1D_MOUSE | 0.00000 | 0.00000 | 0.00000 | 0.00000 | 0.00000 | 0.00000 | 0.02311 | 0.02226 | 0.02155 | 0.01952 | 0.02776 | 0.02269 |
| Q5U3K5 | RABL6_MOUSE | 0.00000 | 0.00000 | 0.00000 | 0.00000 | 0.00000 | 0.00000 | 0.00000 | 0.00312 | 0.00137 | 0.00169 | 0.00175 | 0.00141 |
| Q5U458 | DJC11_MOUSE | 0.00935 | 0.04419 | 0.00360 | 0.00942 | 0.00501 | 0.01100 | 0.00000 | 0.00448 | 0.00369 | 0.00345 | 0.00272 | 0.00446 |
| Q5U4C1 | GASP1_MOUSE | 0.00000 | 0.00000 | 0.00000 | 0.00000 | 0.00000 | 0.00000 | 0.00414 | 0.00437 | 0.00000 | 0.00000 | 0.00884 | 0.02046 |
| Q5U5V2 | HYKK_MOUSE  | 0.00000 | 0.00000 | 0.00000 | 0.00000 | 0.00000 | 0.00000 | 0.00000 | 0.00198 | 0.00000 | 0.00140 | 0.00123 | 0.00095 |
| Q5XG73 | ACBD5_MOUSE | 0.00000 | 0.00000 | 0.00000 | 0.00000 | 0.00000 | 0.00000 | 0.00110 | 0.00189 | 0.00142 | 0.00085 | 0.00000 | 0.00000 |
| Q5XJY5 | COPD_MOUSE  | 0.00177 | 0.00179 | 0.00175 | 0.00233 | 0.00117 | 0.00172 | 0.15659 | 0.11845 | 0.16401 | 0.14186 | 0.19928 | 0.16229 |
| Q5XJY6 | FANCB_MOUSE | 0.00000 | 0.00000 | 0.00000 | 0.00000 | 0.00000 | 0.00000 | 0.00000 | 0.00203 | 0.00119 | 0.00274 | 0.00176 | 0.00171 |
| Q5XKE0 | MYPC2_MOUSE | 0.00000 | 0.00000 | 0.00000 | 0.00000 | 0.00000 | 0.00000 | 0.10023 | 0.00111 | 0.00199 | 0.00228 | 0.00328 | 0.00297 |
| Q5XKN4 | JAGN1_MOUSE | 0.00000 | 0.00000 | 0.00000 | 0.00000 | 0.00000 | 0.00000 | 0.00000 | 0.00494 | 0.00260 | 0.00067 | 0.00061 | 0.00389 |
| Q60590 | A1AG1_MOUSE | 0.00000 | 0.00000 | 0.00000 | 0.00000 | 0.00000 | 0.00000 | 0.01754 | 0.01969 | 0.01719 | 0.01738 | 0.02701 | 0.01167 |
| Q60597 | ODO1_MOUSE  | 0.95968 | 0.93086 | 1.12043 | 0.85408 | 1.00299 | 0.96793 | 0.08327 | 0.05165 | 0.06464 | 0.05937 | 0.06049 | 0.05570 |
| Q60598 | SRC8_MOUSE  | 0.00000 | 0.00000 | 0.00000 | 0.00000 | 0.00000 | 0.00000 | 0.04249 | 0.04735 | 0.05164 | 0.05065 | 0.03445 | 0.05114 |
| Q60604 | ADSV_MOUSE  | 0.00000 | 0.00000 | 0.00000 | 0.00000 | 0.00000 | 0.00000 | 0.00000 | 0.00015 | 0.00007 | 0.00013 | 0.00000 | 0.00000 |
| Q60605 | MYL6_MOUSE  | 0.00000 | 0.00000 | 0.00000 | 0.00000 | 0.00000 | 0.00000 | 0.22957 | 0.21425 | 0.25640 | 0.21350 | 0.23972 | 0.22867 |
| Q60631 | GRB2_MOUSE  | 0.00000 | 0.00000 | 0.00000 | 0.00000 | 0.00000 | 0.00000 | 0.00598 | 0.00702 | 0.00474 | 0.00529 | 0.00520 | 0.00531 |
| Q60634 | FLOT2_MOUSE | 0.00188 | 0.00487 | 0.00189 | 0.00272 | 0.00226 | 0.00423 | 0.01381 | 0.01588 | 0.01948 | 0.01509 | 0.01832 | 0.01795 |
| Q60648 | SAP3_MOUSE  | 0.00000 | 0.00000 | 0.00000 | 0.00000 | 0.00000 | 0.00000 | 0.00000 | 0.00000 | 0.00013 | 0.00000 | 0.00008 | 0.00016 |

|        |             |         |         |         |         |         |         |         |         |         |         |         |         |
|--------|-------------|---------|---------|---------|---------|---------|---------|---------|---------|---------|---------|---------|---------|
| Q60649 | CLPB_MOUSE  | 0.00000 | 0.00000 | 0.00000 | 0.00000 | 0.00000 | 0.00000 | 0.00000 | 0.00000 | 0.00000 | 0.00000 | 0.00000 | 0.00000 |
| Q60668 | HNRPD_MOUSE | 0.00000 | 0.00000 | 0.00000 | 0.00000 | 0.00000 | 0.00000 | 0.10717 | 0.07942 | 0.07808 | 0.09616 | 0.07232 | 0.10973 |
| Q60675 | LAMA2_MOUSE | 0.11086 | 0.19791 | 0.10916 | 0.15632 | 0.12065 | 0.08985 | 0.02383 | 0.01186 | 0.00832 | 0.00689 | 0.00946 | 0.00813 |
| Q60676 | PPP5_MOUSE  | 0.00554 | 0.00588 | 0.00504 | 0.00772 | 0.00474 | 0.01130 | 0.02664 | 0.02143 | 0.02154 | 0.02122 | 0.01461 | 0.02262 |
| Q60692 | PSB6_MOUSE  | 0.00000 | 0.00000 | 0.00000 | 0.00000 | 0.00000 | 0.00000 | 0.00000 | 0.00869 | 0.00519 | 0.00963 | 0.00000 | 0.00383 |
| Q60710 | SAMH1_MOUSE | 0.00000 | 0.00000 | 0.00000 | 0.00000 | 0.00000 | 0.00000 | 0.03395 | 0.03342 | 0.04751 | 0.02978 | 0.05409 | 0.04147 |
| Q60714 | S27A1_MOUSE | 0.00000 | 0.00000 | 0.00000 | 0.00000 | 0.00000 | 0.00000 | 0.00507 | 0.00109 | 0.00449 | 0.00194 | 0.00190 | 0.00079 |
| Q60715 | P4HA1_MOUSE | 0.00000 | 0.00000 | 0.00000 | 0.00000 | 0.00000 | 0.00000 | 0.00427 | 0.00358 | 0.00895 | 0.00698 | 0.00259 | 0.00305 |
| Q60737 | CSK21_MOUSE | 0.00561 | 0.00460 | 0.00531 | 0.00408 | 0.00469 | 0.00377 | 0.01954 | 0.01300 | 0.01923 | 0.01745 | 0.02014 | 0.01667 |
| Q60738 | ZNT1_MOUSE  | 0.00000 | 0.00000 | 0.00000 | 0.00000 | 0.00000 | 0.00000 | 0.00000 | 0.00109 | 0.00217 | 0.00120 | 0.00292 | 0.00034 |
| Q60739 | BAG1_MOUSE  | 0.00000 | 0.00000 | 0.00000 | 0.00000 | 0.00000 | 0.00000 | 0.00229 | 0.00625 | 0.00474 | 0.00542 | 0.00170 | 0.00561 |
| Q60749 | KHDR1_MOUSE | 0.00000 | 0.00000 | 0.00000 | 0.00000 | 0.00000 | 0.00000 | 0.02764 | 0.01699 | 0.01926 | 0.01973 | 0.02689 | 0.02037 |
| Q60759 | GCDH_MOUSE  | 0.07114 | 0.02831 | 0.01993 | 0.02792 | 0.02065 | 0.02719 | 0.00095 | 0.00114 | 0.00061 | 0.00023 | 0.00041 | 0.00031 |
| Q60770 | STXB3_MOUSE | 0.00000 | 0.00000 | 0.00000 | 0.00000 | 0.00000 | 0.00000 | 0.00895 | 0.00809 | 0.00631 | 0.00620 | 0.00687 | 0.00742 |
| Q60780 | GAS7_MOUSE  | 0.00000 | 0.00000 | 0.00000 | 0.00000 | 0.00000 | 0.00000 | 0.00204 | 0.00022 | 0.00022 | 0.00000 | 0.00027 | 0.00000 |
| Q60790 | RASA3_MOUSE | 0.00000 | 0.00000 | 0.00000 | 0.00000 | 0.00000 | 0.00000 | 0.00652 | 0.00285 | 0.00528 | 0.00436 | 0.00614 | 0.00494 |
| Q60825 | NPT2A_MOUSE | 0.00000 | 0.00000 | 0.00000 | 0.00000 | 0.00000 | 0.00000 | 0.00069 | 0.00000 | 0.00046 | 0.00079 | 0.00125 | 0.00000 |
| Q60829 | PPR1B_MOUSE | 0.00000 | 0.00000 | 0.00000 | 0.00000 | 0.00000 | 0.00000 | 0.00000 | 0.00000 | 0.00000 | 0.00000 | 0.00000 | 0.00000 |
| Q60847 | COCA1_MOUSE | 0.00000 | 0.00000 | 0.00000 | 0.00000 | 0.00000 | 0.00000 | 0.06694 | 0.05706 | 0.04452 | 0.02294 | 0.06545 | 0.05023 |
| Q60854 | SPB6_MOUSE  | 0.01416 | 0.01603 | 0.01089 | 0.01504 | 0.01700 | 0.01841 | 0.17351 | 0.11289 | 0.11741 | 0.11220 | 0.11485 | 0.13577 |
| Q60864 | STIP1_MOUSE | 0.00699 | 0.00730 | 0.00941 | 0.01136 | 0.00682 | 0.00716 | 0.02110 | 0.01797 | 0.02179 | 0.02029 | 0.01801 | 0.02018 |
| Q60865 | CAPR1_MOUSE | 0.00000 | 0.00000 | 0.00000 | 0.00000 | 0.00000 | 0.00000 | 0.01197 | 0.01066 | 0.01142 | 0.01047 | 0.01073 | 0.01208 |
| Q60866 | PTER_MOUSE  | 0.00000 | 0.00000 | 0.00000 | 0.00000 | 0.00000 | 0.00000 | 0.00000 | 0.00000 | 0.00000 | 0.00000 | 0.00000 | 0.00000 |
| Q60870 | REEP5_MOUSE | 0.00000 | 0.00000 | 0.00000 | 0.00000 | 0.00000 | 0.00000 | 0.00000 | 0.00825 | 0.00832 | 0.00529 | 0.00251 | 0.00361 |
| Q8BMJ3 | IF1AX_MOUSE | 0.00000 | 0.00000 | 0.00000 | 0.00000 | 0.00000 | 0.00000 | 0.00000 | 0.00362 | 0.00600 | 0.00508 | 0.00256 | 0.00288 |
| Q60875 | ARHG2_MOUSE | 0.00000 | 0.00000 | 0.00000 | 0.00000 | 0.00000 | 0.00000 | 0.00133 | 0.00560 | 0.00852 | 0.00591 | 0.01028 | 0.00923 |
| Q60902 | EP15R_MOUSE | 0.00411 | 0.00486 | 0.00260 | 0.00275 | 0.00234 | 0.00353 | 0.01238 | 0.01394 | 0.01761 | 0.01669 | 0.01254 | 0.01698 |
| Q60928 | GGT1_MOUSE  | 0.00000 | 0.00000 | 0.00000 | 0.00000 | 0.00000 | 0.00000 | 0.00000 | 0.00013 | 0.00000 | 0.00000 | 0.00000 | 0.00019 |
| Q60930 | VDAC2_MOUSE | 0.14383 | 0.05773 | 0.13858 | 0.15335 | 0.12314 | 0.08867 | 0.05115 | 0.06814 | 0.03198 | 0.04619 | 0.03363 | 0.04625 |
| Q60931 | VDAC3_MOUSE | 0.11725 | 0.07720 | 0.09655 | 0.08346 | 0.10084 | 0.13440 | 0.06210 | 0.05201 | 0.02598 | 0.03769 | 0.03990 | 0.04741 |
| Q60932 | VDAC1_MOUSE | 0.35024 | 0.23032 | 0.40474 | 0.39291 | 0.39341 | 0.29100 | 0.11226 | 0.09733 | 0.07205 | 0.08679 | 0.08742 | 0.09278 |
| Q60936 | COQ8A_MOUSE | 0.02253 | 0.01388 | 0.02098 | 0.01687 | 0.01108 | 0.02324 | 0.00135 | 0.00000 | 0.00000 | 0.00038 | 0.00000 | 0.00000 |
| Q60953 | PML_MOUSE   | 0.00000 | 0.00000 | 0.00000 | 0.00000 | 0.00000 | 0.00000 | 0.00270 | 0.00367 | 0.00441 | 0.00356 | 0.00413 | 0.00442 |
| Q60960 | IMA5_MOUSE  | 0.00059 | 0.00055 | 0.00053 | 0.00038 | 0.00067 | 0.00041 | 0.00088 | 0.00263 | 0.00402 | 0.00000 | 0.00188 | 0.00166 |



|        |             |         |         |         |         |         |         |         |         |         |         |         |         |
|--------|-------------|---------|---------|---------|---------|---------|---------|---------|---------|---------|---------|---------|---------|
| Q60967 | PAPS1_MOUSE | 0.00000 | 0.00000 | 0.00000 | 0.00000 | 0.00000 | 0.00000 | 0.00000 | 0.00000 | 0.00079 | 0.00000 | 0.00000 | 0.00000 |
| Q60972 | RBBP4_MOUSE | 0.00000 | 0.00000 | 0.00000 | 0.00000 | 0.00000 | 0.00000 | 0.01615 | 0.01325 | 0.02433 | 0.02494 | 0.01427 | 0.02002 |
| Q60973 | RBBP7_MOUSE | 0.00000 | 0.00000 | 0.00000 | 0.00000 | 0.00000 | 0.00000 | 0.02688 | 0.03164 | 0.03035 | 0.02809 | 0.03205 | 0.03219 |
| Q60991 | CP7B1_MOUSE | 0.00000 | 0.00000 | 0.00000 | 0.00000 | 0.00000 | 0.00000 | 0.00000 | 0.00000 | 0.00000 | 0.00103 | 0.00000 | 0.00000 |
| Q60994 | ADIPO_MOUSE | 0.01935 | 0.01694 | 0.01044 | 0.02266 | 0.01471 | 0.02189 | 0.00950 | 0.01474 | 0.01970 | 0.01669 | 0.01121 | 0.00725 |
| Q61001 | LAMA5_MOUSE | 0.00727 | 0.02276 | 0.01646 | 0.00959 | 0.00701 | 0.00970 | 0.21464 | 0.14625 | 0.17433 | 0.11231 | 0.24160 | 0.18082 |
| Q61029 | LAP2B_MOUSE | 0.00266 | 0.00657 | 0.00417 | 0.00493 | 0.00286 | 0.00338 | 0.03458 | 0.03320 | 0.04704 | 0.03723 | 0.05711 | 0.05195 |
| Q61033 | LAP2A_MOUSE | 0.00000 | 0.00000 | 0.00000 | 0.00000 | 0.00000 | 0.00000 | 0.00331 | 0.00245 | 0.00369 | 0.00237 | 0.00578 | 0.00412 |
| Q61035 | HARS1_MOUSE | 0.00000 | 0.00000 | 0.00000 | 0.00000 | 0.00000 | 0.00000 | 0.00609 | 0.00998 | 0.01294 | 0.00812 | 0.00171 | 0.01325 |
| Q61074 | PPM1G_MOUSE | 0.00000 | 0.00000 | 0.00000 | 0.00000 | 0.00000 | 0.00000 | 0.00000 | 0.00357 | 0.00218 | 0.00310 | 0.00123 | 0.00534 |
| Q61081 | CDC37_MOUSE | 0.00476 | 0.00664 | 0.00250 | 0.00290 | 0.00383 | 0.00623 | 0.03575 | 0.02773 | 0.04553 | 0.05017 | 0.03334 | 0.03939 |
| Q61087 | LAMB3_MOUSE | 0.00000 | 0.00000 | 0.00000 | 0.00000 | 0.00000 | 0.00000 | 0.04373 | 0.03915 | 0.05069 | 0.03375 | 0.05734 | 0.05397 |
| Q61092 | LAMC2_MOUSE | 0.00000 | 0.00000 | 0.00000 | 0.00000 | 0.00000 | 0.00000 | 0.04529 | 0.02063 | 0.03398 | 0.02051 | 0.06836 | 0.03776 |
| Q61093 | CY24B_MOUSE | 0.00000 | 0.00000 | 0.00000 | 0.00000 | 0.00000 | 0.00000 | 0.00884 | 0.01267 | 0.00999 | 0.00974 | 0.01154 | 0.01796 |
| Q61102 | ABC7_MOUSE  | 0.00000 | 0.00000 | 0.00000 | 0.00000 | 0.00000 | 0.00000 | 0.00449 | 0.00444 | 0.00536 | 0.00419 | 0.00161 | 0.00238 |
| Q61103 | REQU_MOUSE  | 0.00000 | 0.00000 | 0.00000 | 0.00000 | 0.00000 | 0.00000 | 0.00362 | 0.00151 | 0.00412 | 0.00373 | 0.00408 | 0.00420 |
| Q61107 | GBP4_MOUSE  | 0.00000 | 0.00000 | 0.00000 | 0.00000 | 0.00000 | 0.00000 | 0.00000 | 0.00000 | 0.00247 | 0.00170 | 0.00035 | 0.00044 |
| Q61114 | BPIB1_MOUSE | 0.00000 | 0.00000 | 0.00000 | 0.00000 | 0.00000 | 0.00000 | 0.00179 | 0.00000 | 0.00449 | 0.00179 | 0.00507 | 0.00389 |
| Q61129 | CFAI_MOUSE  | 0.00000 | 0.00000 | 0.00000 | 0.00000 | 0.00000 | 0.00000 | 0.00000 | 0.00000 | 0.00066 | 0.00199 | 0.00171 | 0.00062 |
| Q61133 | GSTT2_MOUSE | 0.00000 | 0.00000 | 0.00000 | 0.00000 | 0.00000 | 0.00000 | 0.00980 | 0.00770 | 0.00753 | 0.00890 | 0.00583 | 0.00896 |
| Q61146 | OCLN_MOUSE  | 0.00000 | 0.00000 | 0.00000 | 0.00000 | 0.00000 | 0.00000 | 0.00419 | 0.00839 | 0.01145 | 0.00920 | 0.01477 | 0.00758 |
| Q61147 | CERU_MOUSE  | 0.00564 | 0.00209 | 0.00467 | 0.00454 | 0.00306 | 0.00239 | 0.01355 | 0.01565 | 0.01847 | 0.02324 | 0.02420 | 0.01569 |
| Q61151 | 2A5E_MOUSE  | 0.00060 | 0.00127 | 0.00070 | 0.00029 | 0.00144 | 0.00153 | 0.00030 | 0.00000 | 0.00034 | 0.00060 | 0.00101 | 0.00084 |
| Q61165 | SL9A1_MOUSE | 0.00000 | 0.00000 | 0.00000 | 0.00000 | 0.00000 | 0.00000 | 0.00000 | 0.00204 | 0.00195 | 0.00127 | 0.00192 | 0.00158 |
| Q61166 | MARE1_MOUSE | 0.00441 | 0.00750 | 0.00549 | 0.00379 | 0.00612 | 0.00545 | 0.01480 | 0.01606 | 0.01970 | 0.02118 | 0.01456 | 0.01910 |
| Q61171 | PRDX2_MOUSE | 0.04809 | 0.03861 | 0.06557 | 0.07182 | 0.07180 | 0.06794 | 0.23185 | 0.08888 | 0.12812 | 0.21909 | 0.33768 | 0.14849 |
| Q61187 | TS101_MOUSE | 0.00000 | 0.00000 | 0.00000 | 0.00000 | 0.00000 | 0.00000 | 0.00347 | 0.00174 | 0.00379 | 0.00275 | 0.00417 | 0.00266 |
| Q61189 | ICLN_MOUSE  | 0.00000 | 0.00000 | 0.00000 | 0.00000 | 0.00000 | 0.00000 | 0.00119 | 0.00000 | 0.00333 | 0.00000 | 0.00398 | 0.00253 |
| Q61191 | HCFC1_MOUSE | 0.00000 | 0.00000 | 0.00000 | 0.00000 | 0.00000 | 0.00000 | 0.00577 | 0.00361 | 0.00848 | 0.00520 | 0.00000 | 0.00626 |
| Q61206 | PA1B2_MOUSE | 0.00000 | 0.00000 | 0.00000 | 0.00000 | 0.00000 | 0.00000 | 0.04603 | 0.03209 | 0.04141 | 0.03327 | 0.04417 | 0.03802 |
| Q61210 | ARHG1_MOUSE | 0.00000 | 0.00000 | 0.00000 | 0.00000 | 0.00000 | 0.00000 | 0.01005 | 0.01443 | 0.02093 | 0.01668 | 0.01538 | 0.01984 |
| Q61211 | EIF2D_MOUSE | 0.00000 | 0.00000 | 0.00000 | 0.00000 | 0.00000 | 0.00000 | 0.00000 | 0.00132 | 0.01201 | 0.00546 | 0.00000 | 0.00000 |
| Q61233 | PLSL_MOUSE  | 0.00475 | 0.00379 | 0.00399 | 0.00753 | 0.00660 | 0.00458 | 0.05396 | 0.05952 | 0.06412 | 0.07388 | 0.07018 | 0.08432 |
| Q61234 | SNTA1_MOUSE | 0.01986 | 0.01513 | 0.01521 | 0.01155 | 0.01936 | 0.02350 | 0.00484 | 0.00280 | 0.00463 | 0.00267 | 0.00341 | 0.00329 |

|        |             |         |         |         |         |         |         |         |         |         |         |         |         |
|--------|-------------|---------|---------|---------|---------|---------|---------|---------|---------|---------|---------|---------|---------|
| Q61235 | SNTB2_MOUSE | 0.00000 | 0.00000 | 0.00000 | 0.00000 | 0.00000 | 0.00000 | 0.01961 | 0.01449 | 0.01923 | 0.01703 | 0.02051 | 0.01999 |
| Q61247 | A2AP_MOUSE  | 0.00000 | 0.00000 | 0.00000 | 0.00000 | 0.00000 | 0.00000 | 0.00963 | 0.00607 | 0.00920 | 0.00890 | 0.01243 | 0.00536 |
| Q61249 | IGBP1_MOUSE | 0.00000 | 0.00000 | 0.00000 | 0.00000 | 0.00000 | 0.00000 | 0.00210 | 0.00689 | 0.00555 | 0.00517 | 0.00437 | 0.00444 |
| Q61263 | SOAT1_MOUSE | 0.00000 | 0.00000 | 0.00000 | 0.00000 | 0.00000 | 0.00000 | 0.00123 | 0.00565 | 0.00728 | 0.00368 | 0.00441 | 0.00430 |
| Q61282 | PGCA_MOUSE  | 0.00000 | 0.00000 | 0.00000 | 0.00000 | 0.00000 | 0.00000 | 0.06290 | 0.00000 | 0.00000 | 0.00075 | 0.02394 | 0.00000 |
| Q61288 | ACVL1_MOUSE | 0.00000 | 0.00000 | 0.00000 | 0.00000 | 0.00000 | 0.00000 | 0.00479 | 0.00340 | 0.00480 | 0.00350 | 0.00475 | 0.00459 |
| Q61290 | CAC1E_MOUSE | 0.00000 | 0.00000 | 0.00000 | 0.00000 | 0.00000 | 0.00000 | 0.00628 | 0.00276 | 0.01101 | 0.00731 | 0.00612 | 0.00687 |
| Q61292 | LAMB2_MOUSE | 0.02939 | 0.05052 | 0.02810 | 0.04466 | 0.03338 | 0.02111 | 0.13075 | 0.11823 | 0.11799 | 0.07867 | 0.13768 | 0.13182 |
| Q61301 | CTNA2_MOUSE | 0.00000 | 0.00000 | 0.00000 | 0.00000 | 0.00000 | 0.00000 | 0.01321 | 0.00733 | 0.01107 | 0.00925 | 0.01369 | 0.01047 |
| Q61316 | HSP74_MOUSE | 0.03074 | 0.03077 | 0.02973 | 0.02659 | 0.03624 | 0.03050 | 0.03057 | 0.03365 | 0.04036 | 0.03925 | 0.02787 | 0.03872 |
| Q61334 | BAP29_MOUSE | 0.00000 | 0.00000 | 0.00000 | 0.00000 | 0.00000 | 0.00000 | 0.00000 | 0.00154 | 0.00286 | 0.00202 | 0.00169 | 0.00083 |
| Q61335 | BAP31_MOUSE | 0.00423 | 0.00108 | 0.00217 | 0.00141 | 0.00049 | 0.00000 | 0.00706 | 0.02797 | 0.02950 | 0.02142 | 0.02002 | 0.01874 |
| Q61362 | CH3L1_MOUSE | 0.00000 | 0.00000 | 0.00000 | 0.00000 | 0.00000 | 0.00000 | 0.01857 | 0.01166 | 0.01962 | 0.01588 | 0.01689 | 0.02455 |
| Q61391 | NEP_MOUSE   | 0.00000 | 0.00000 | 0.00000 | 0.00000 | 0.00000 | 0.00000 | 0.01914 | 0.02069 | 0.02670 | 0.02648 | 0.02913 | 0.03057 |
| Q61398 | PCOC1_MOUSE | 0.00000 | 0.00000 | 0.00000 | 0.00000 | 0.00000 | 0.00000 | 0.00106 | 0.00410 | 0.00000 | 0.00000 | 0.00036 | 0.00045 |
| Q61411 | RASH_MOUSE  | 0.00000 | 0.00000 | 0.00000 | 0.00000 | 0.00000 | 0.00000 | 0.04331 | 0.02262 | 0.03141 | 0.03176 | 0.03506 | 0.03254 |
| Q61425 | HCDH_MOUSE  | 0.15789 | 0.11288 | 0.24154 | 0.28067 | 0.33046 | 0.17295 | 0.05877 | 0.03397 | 0.04036 | 0.02936 | 0.04796 | 0.04071 |
| Q61469 | PLPP1_MOUSE | 0.00000 | 0.00000 | 0.00000 | 0.00000 | 0.00000 | 0.00000 | 0.00000 | 0.00332 | 0.00585 | 0.00341 | 0.00154 | 0.00146 |
| Q61490 | CD166_MOUSE | 0.00000 | 0.00000 | 0.00000 | 0.00000 | 0.00000 | 0.00000 | 0.03433 | 0.04523 | 0.04407 | 0.04388 | 0.05262 | 0.04816 |
| Q61503 | 5NTD_MOUSE  | 0.00000 | 0.00000 | 0.00000 | 0.00000 | 0.00000 | 0.00000 | 0.02872 | 0.02147 | 0.02365 | 0.02995 | 0.02918 | 0.02593 |
| Q61508 | ECM1_MOUSE  | 0.00000 | 0.00000 | 0.00000 | 0.00000 | 0.00000 | 0.00000 | 0.00658 | 0.00804 | 0.00416 | 0.00514 | 0.00108 | 0.00133 |
| Q61510 | TRI25_MOUSE | 0.00000 | 0.00000 | 0.00000 | 0.00000 | 0.00000 | 0.00000 | 0.00578 | 0.01396 | 0.00750 | 0.00970 | 0.00660 | 0.00907 |
| Q61543 | GSLG1_MOUSE | 0.01230 | 0.00843 | 0.01380 | 0.01544 | 0.01089 | 0.00947 | 0.00395 | 0.00340 | 0.00502 | 0.00322 | 0.00354 | 0.00273 |
| Q61545 | EWS_MOUSE   | 0.00000 | 0.00000 | 0.00000 | 0.00000 | 0.00000 | 0.00000 | 0.01206 | 0.01642 | 0.01167 | 0.01525 | 0.00656 | 0.00750 |
| Q61550 | RAD21_MOUSE | 0.00000 | 0.00000 | 0.00000 | 0.00000 | 0.00000 | 0.00000 | 0.00000 | 0.00131 | 0.00081 | 0.00000 | 0.00000 | 0.00196 |
| Q61553 | FSCN1_MOUSE | 0.00000 | 0.00000 | 0.00000 | 0.00000 | 0.00000 | 0.00000 | 0.00528 | 0.00525 | 0.00725 | 0.00657 | 0.00372 | 0.00437 |
| Q61554 | FBN1_MOUSE  | 0.04244 | 0.08226 | 0.06446 | 0.03992 | 0.05792 | 0.03285 | 0.00442 | 0.01861 | 0.02047 | 0.00899 | 0.01145 | 0.00691 |
| Q61581 | IBP7_MOUSE  | 0.00000 | 0.00000 | 0.00000 | 0.00000 | 0.00000 | 0.00000 | 0.00166 | 0.00170 | 0.00208 | 0.00230 | 0.00231 | 0.00223 |
| Q61584 | FXR1_MOUSE  | 0.00144 | 0.00098 | 0.00129 | 0.00116 | 0.00072 | 0.00169 | 0.00244 | 0.00620 | 0.00310 | 0.00791 | 0.00132 | 0.00213 |
| Q61586 | GPAT1_MOUSE | 0.00000 | 0.00000 | 0.00000 | 0.00000 | 0.00000 | 0.00000 | 0.00000 | 0.00000 | 0.00057 | 0.00000 | 0.00000 | 0.00000 |
| Q61595 | KTN1_MOUSE  | 0.00209 | 0.00340 | 0.00199 | 0.00250 | 0.00224 | 0.00107 | 0.00288 | 0.00171 | 0.00438 | 0.00274 | 0.00440 | 0.00229 |
| Q61598 | GDIB_MOUSE  | 0.03323 | 0.04020 | 0.03190 | 0.03726 | 0.04192 | 0.03124 | 0.05894 | 0.06647 | 0.07046 | 0.06773 | 0.07204 | 0.06560 |
| Q61599 | GDIR2_MOUSE | 0.00000 | 0.00000 | 0.00000 | 0.00000 | 0.00000 | 0.00000 | 0.08920 | 0.07313 | 0.09647 | 0.10274 | 0.10878 | 0.12901 |
| Q61646 | HPT_MOUSE   | 0.00000 | 0.00000 | 0.00000 | 0.00000 | 0.00000 | 0.00000 | 0.01778 | 0.05501 | 0.01044 | 0.00893 | 0.01168 | 0.02135 |

|        |             |         |         |         |         |         |         |         |         |         |         |         |         |
|--------|-------------|---------|---------|---------|---------|---------|---------|---------|---------|---------|---------|---------|---------|
| Q61655 | DD19A_MOUSE | 0.00000 | 0.00000 | 0.00000 | 0.00000 | 0.00000 | 0.00000 | 0.00239 | 0.00897 | 0.00494 | 0.00418 | 0.00598 | 0.00575 |
| Q61656 | DDX5_MOUSE  | 0.00000 | 0.00000 | 0.00000 | 0.00000 | 0.00000 | 0.00000 | 0.01216 | 0.02032 | 0.01560 | 0.01789 | 0.01682 | 0.01976 |
| Q61686 | CBX5_MOUSE  | 0.00000 | 0.00000 | 0.00000 | 0.00000 | 0.00000 | 0.00000 | 0.00000 | 0.01383 | 0.00696 | 0.00658 | 0.00638 | 0.00566 |
| Q61699 | HS105_MOUSE | 0.00000 | 0.00000 | 0.00000 | 0.00000 | 0.00000 | 0.00000 | 0.01422 | 0.01793 | 0.01286 | 0.01458 | 0.01437 | 0.01522 |
| Q61702 | ITIH1_MOUSE | 0.00131 | 0.00119 | 0.00116 | 0.00157 | 0.00126 | 0.00137 | 0.00662 | 0.01487 | 0.01029 | 0.01377 | 0.02711 | 0.00862 |
| Q61703 | ITIH2_MOUSE | 0.00000 | 0.00000 | 0.00000 | 0.00000 | 0.00000 | 0.00000 | 0.00297 | 0.00189 | 0.00322 | 0.00501 | 0.00868 | 0.00099 |
| Q61733 | RT31_MOUSE  | 0.00000 | 0.00000 | 0.00000 | 0.00000 | 0.00000 | 0.00000 | 0.00000 | 0.00000 | 0.00000 | 0.00000 | 0.00000 | 0.00000 |
| Q61735 | CD47_MOUSE  | 0.00000 | 0.00000 | 0.00000 | 0.00000 | 0.00000 | 0.00000 | 0.02841 | 0.06414 | 0.05638 | 0.06175 | 0.03066 | 0.05981 |
| Q61739 | ITA6_MOUSE  | 0.00332 | 0.00387 | 0.00253 | 0.00253 | 0.00217 | 0.00305 | 0.01223 | 0.00727 | 0.01305 | 0.00999 | 0.01276 | 0.01374 |
| Q61753 | SERA_MOUSE  | 0.00000 | 0.00000 | 0.00000 | 0.00000 | 0.00000 | 0.00000 | 0.00000 | 0.00000 | 0.00000 | 0.00000 | 0.00000 | 0.00000 |
| Q61767 | 3BHS4_MOUSE | 0.00000 | 0.00000 | 0.00000 | 0.00000 | 0.00000 | 0.00000 | 0.00019 | 0.00010 | 0.00005 | 0.00009 | 0.00008 | 0.00000 |
| Q61768 | KINH_MOUSE  | 0.02262 | 0.02276 | 0.01655 | 0.01561 | 0.02102 | 0.01849 | 0.02039 | 0.01610 | 0.01801 | 0.01677 | 0.01631 | 0.01971 |
| Q61781 | K1C14_MOUSE | 0.00000 | 0.00000 | 0.00000 | 0.00000 | 0.00000 | 0.00000 | 0.01859 | 0.00088 | 0.00231 | 0.00000 | 0.00077 | 0.00398 |
| Q61789 | LAMA3_MOUSE | 0.00000 | 0.00000 | 0.00000 | 0.00000 | 0.00000 | 0.00000 | 0.05915 | 0.03805 | 0.04797 | 0.03044 | 0.07980 | 0.05763 |
| Q61792 | LASP1_MOUSE | 0.00000 | 0.00000 | 0.00000 | 0.00000 | 0.00000 | 0.00000 | 0.00177 | 0.03255 | 0.02715 | 0.03193 | 0.01499 | 0.02533 |
| Q61830 | MRC1_MOUSE  | 0.00548 | 0.00304 | 0.00337 | 0.00249 | 0.00236 | 0.00343 | 0.00647 | 0.00370 | 0.00491 | 0.00226 | 0.00246 | 0.00197 |
| Q61838 | PZP_MOUSE   | 0.04816 | 0.02267 | 0.02722 | 0.07146 | 0.03243 | 0.02451 | 0.19444 | 0.05237 | 0.09457 | 0.26379 | 0.33407 | 0.05131 |
| Q61847 | MEP1B_MOUSE | 0.00000 | 0.00000 | 0.00000 | 0.00000 | 0.00000 | 0.00000 | 0.00000 | 0.00000 | 0.00000 | 0.00000 | 0.00000 | 0.00139 |
| Q61878 | PRG2_MOUSE  | 0.00000 | 0.00000 | 0.00000 | 0.00000 | 0.00000 | 0.00000 | 0.01185 | 0.04864 | 0.01495 | 0.03216 | 0.01921 | 0.06513 |
| Q61879 | MYH10_MOUSE | 0.00431 | 0.00464 | 0.00673 | 0.00584 | 0.00762 | 0.00448 | 0.09785 | 0.09595 | 0.10254 | 0.09607 | 0.11549 | 0.11063 |
| Q61937 | NPM_MOUSE   | 0.00422 | 0.00679 | 0.00660 | 0.00649 | 0.00748 | 0.00607 | 0.05170 | 0.03256 | 0.04297 | 0.03965 | 0.05324 | 0.04306 |
| Q61990 | PCBP2_MOUSE | 0.00019 | 0.00021 | 0.00076 | 0.00045 | 0.00011 | 0.00053 | 0.05247 | 0.06260 | 0.07038 | 0.07399 | 0.05552 | 0.08328 |
| Q62000 | MIME_MOUSE  | 0.00012 | 0.00013 | 0.00128 | 0.00178 | 0.00228 | 0.00399 | 0.12788 | 0.12494 | 0.15201 | 0.11599 | 0.15350 | 0.13198 |
| Q62009 | POSTN_MOUSE | 0.01267 | 0.01917 | 0.01525 | 0.01389 | 0.01320 | 0.00977 | 0.12806 | 0.07129 | 0.09442 | 0.06543 | 0.15279 | 0.11800 |
| Q62048 | PEA15_MOUSE | 0.00000 | 0.00000 | 0.00000 | 0.00000 | 0.00000 | 0.00000 | 0.02807 | 0.03071 | 0.04129 | 0.04319 | 0.05381 | 0.03225 |
| Q62074 | KPCI_MOUSE  | 0.00000 | 0.00000 | 0.00000 | 0.00000 | 0.00000 | 0.00000 | 0.00709 | 0.01071 | 0.01083 | 0.00939 | 0.00952 | 0.01032 |
| Q62077 | PLCG1_MOUSE | 0.00000 | 0.00000 | 0.00000 | 0.00000 | 0.00000 | 0.00000 | 0.00033 | 0.00259 | 0.00149 | 0.00036 | 0.00415 | 0.00163 |
| Q62086 | PON2_MOUSE  | 0.00000 | 0.00000 | 0.00000 | 0.00000 | 0.00000 | 0.00000 | 0.00416 | 0.00399 | 0.01104 | 0.00822 | 0.01150 | 0.00637 |
| Q62087 | PON3_MOUSE  | 0.00000 | 0.00000 | 0.00000 | 0.00000 | 0.00000 | 0.00000 | 0.07024 | 0.06184 | 0.06845 | 0.05845 | 0.05244 | 0.08212 |
| Q62093 | SRSF2_MOUSE | 0.00400 | 0.00149 | 0.00450 | 0.00665 | 0.00311 | 0.00431 | 0.03250 | 0.04863 | 0.03767 | 0.04761 | 0.05653 | 0.03624 |
| Q62095 | DDX3Y_MOUSE | 0.00000 | 0.00000 | 0.00000 | 0.00000 | 0.00000 | 0.00000 | 0.00636 | 0.00721 | 0.01065 | 0.00842 | 0.01190 | 0.00766 |
| Q62148 | AL1A2_MOUSE | 0.00000 | 0.00000 | 0.00000 | 0.00000 | 0.00000 | 0.00000 | 0.00661 | 0.00746 | 0.01439 | 0.00889 | 0.00845 | 0.00816 |
| Q62151 | RAGE_MOUSE  | 0.00000 | 0.00000 | 0.00000 | 0.00000 | 0.00000 | 0.00000 | 0.44220 | 0.91392 | 0.64256 | 0.67273 | 0.53278 | 0.69009 |
| Q62165 | DAG1_MOUSE  | 0.00569 | 0.00692 | 0.01003 | 0.00898 | 0.01100 | 0.00596 | 0.02793 | 0.03017 | 0.03073 | 0.02923 | 0.02574 | 0.02992 |

|        |             |         |         |         |         |         |         |         |         |         |         |         |         |
|--------|-------------|---------|---------|---------|---------|---------|---------|---------|---------|---------|---------|---------|---------|
| Q62167 | DDX3X_MOUSE | 0.00367 | 0.00704 | 0.00469 | 0.00638 | 0.00385 | 0.00433 | 0.03153 | 0.03013 | 0.02867 | 0.02558 | 0.02438 | 0.02879 |
| Q62186 | SSRD_MOUSE  | 0.00000 | 0.00000 | 0.00000 | 0.00000 | 0.00000 | 0.00000 | 0.07310 | 0.04831 | 0.08453 | 0.06672 | 0.08471 | 0.06635 |
| Q62188 | DPYL3_MOUSE | 0.00254 | 0.00383 | 0.00352 | 0.00321 | 0.00406 | 0.00370 | 0.04301 | 0.03987 | 0.04225 | 0.03666 | 0.04651 | 0.04276 |
| Q62189 | SNRPA_MOUSE | 0.00000 | 0.00000 | 0.00000 | 0.00000 | 0.00000 | 0.00000 | 0.00519 | 0.00552 | 0.00819 | 0.00571 | 0.01100 | 0.00873 |
| Q62219 | TGF1_MOUSE  | 0.00000 | 0.00000 | 0.00000 | 0.00000 | 0.00000 | 0.00000 | 0.01041 | 0.02697 | 0.02471 | 0.02029 | 0.02262 | 0.02395 |
| Q62234 | MYOM1_MOUSE | 0.46123 | 0.46206 | 0.37754 | 0.38119 | 0.48552 | 0.44529 | 0.02474 | 0.00280 | 0.00539 | 0.00577 | 0.00453 | 0.00365 |
| Q62241 | RU1C_MOUSE  | 0.00000 | 0.00000 | 0.00000 | 0.00000 | 0.00000 | 0.00000 | 0.00178 | 0.00785 | 0.00882 | 0.00979 | 0.00589 | 0.01157 |
| Q62261 | SPTB2_MOUSE | 0.25261 | 0.21113 | 0.19059 | 0.15814 | 0.21030 | 0.17292 | 0.14108 | 0.13387 | 0.15480 | 0.14518 | 0.14655 | 0.14819 |
| Q62264 | THRSP_MOUSE | 0.00000 | 0.00000 | 0.00000 | 0.00000 | 0.00000 | 0.00000 | 0.00000 | 0.00000 | 0.00786 | 0.00000 | 0.00000 | 0.00000 |
| Q62283 | TSN7_MOUSE  | 0.00000 | 0.00000 | 0.00000 | 0.00000 | 0.00000 | 0.00000 | 0.00000 | 0.00920 | 0.01659 | 0.01388 | 0.00994 | 0.00759 |
| Q62312 | TGFR2_MOUSE | 0.00000 | 0.00000 | 0.00000 | 0.00000 | 0.00000 | 0.00000 | 0.00000 | 0.00071 | 0.00000 | 0.00000 | 0.00000 | 0.00336 |
| Q62313 | TGON1_MOUSE | 0.00000 | 0.00000 | 0.00000 | 0.00000 | 0.00000 | 0.00000 | 0.00000 | 0.00000 | 0.00136 | 0.00000 | 0.00000 | 0.00017 |
| Q62318 | TIF1B_MOUSE | 0.00000 | 0.00000 | 0.00000 | 0.00000 | 0.00000 | 0.00000 | 0.03177 | 0.03200 | 0.03651 | 0.03203 | 0.03443 | 0.04606 |
| Q62348 | TSN_MOUSE   | 0.00000 | 0.00000 | 0.00000 | 0.00000 | 0.00000 | 0.00000 | 0.01452 | 0.01280 | 0.01909 | 0.01877 | 0.02372 | 0.01822 |
| Q62351 | TFR1_MOUSE  | 0.00000 | 0.00000 | 0.00000 | 0.00000 | 0.00000 | 0.00000 | 0.00125 | 0.00109 | 0.00156 | 0.00130 | 0.00179 | 0.00053 |
| Q62376 | RU17_MOUSE  | 0.00000 | 0.00000 | 0.00000 | 0.00000 | 0.00000 | 0.00000 | 0.01134 | 0.01308 | 0.01686 | 0.01368 | 0.01258 | 0.01302 |
| Q62393 | TPD52_MOUSE | 0.00000 | 0.00000 | 0.00000 | 0.00000 | 0.00000 | 0.00000 | 0.00717 | 0.01012 | 0.00818 | 0.00552 | 0.00758 | 0.01111 |
| Q62417 | SRBS1_MOUSE | 0.09127 | 0.05072 | 0.04075 | 0.04748 | 0.04978 | 0.05071 | 0.01141 | 0.01502 | 0.01856 | 0.01410 | 0.02039 | 0.01585 |
| Q62418 | DBNL_MOUSE  | 0.00291 | 0.00295 | 0.00227 | 0.00199 | 0.00306 | 0.00426 | 0.02727 | 0.03163 | 0.03986 | 0.04184 | 0.03839 | 0.03921 |
| Q62419 | SH3G1_MOUSE | 0.00000 | 0.00000 | 0.00000 | 0.00000 | 0.00000 | 0.00000 | 0.00659 | 0.00957 | 0.00781 | 0.00986 | 0.00679 | 0.01314 |
| Q62422 | OSTF1_MOUSE | 0.00000 | 0.00000 | 0.00000 | 0.00000 | 0.00000 | 0.00000 | 0.02107 | 0.01474 | 0.02150 | 0.02139 | 0.02741 | 0.02488 |
| Q62425 | NDUA4_MOUSE | 0.00000 | 0.00000 | 0.00000 | 0.00000 | 0.00000 | 0.00000 | 0.00110 | 0.15237 | 0.08495 | 0.01920 | 0.03092 | 0.14102 |
| Q62433 | NDRG1_MOUSE | 0.00000 | 0.00000 | 0.00000 | 0.00000 | 0.00000 | 0.00000 | 0.00347 | 0.00258 | 0.00508 | 0.00346 | 0.00428 | 0.00283 |
| Q62446 | FKBP3_MOUSE | 0.00191 | 0.00311 | 0.00378 | 0.00276 | 0.00145 | 0.00114 | 0.00441 | 0.00440 | 0.00682 | 0.00657 | 0.00546 | 0.00530 |
| Q62448 | IF4G2_MOUSE | 0.00023 | 0.00020 | 0.00048 | 0.00039 | 0.00085 | 0.00040 | 0.01197 | 0.00668 | 0.00961 | 0.01006 | 0.01081 | 0.01166 |
| Q62465 | VAT1_MOUSE  | 0.00460 | 0.00374 | 0.00340 | 0.00314 | 0.00302 | 0.00423 | 0.08925 | 0.10053 | 0.08966 | 0.09335 | 0.08455 | 0.09886 |
| Q62468 | VILI_MOUSE  | 0.00000 | 0.00000 | 0.00000 | 0.00000 | 0.00000 | 0.00000 | 0.00006 | 0.00005 | 0.00005 | 0.00000 | 0.00005 | 0.00003 |
| Q62469 | ITA2_MOUSE  | 0.00000 | 0.00000 | 0.00000 | 0.00000 | 0.00000 | 0.00000 | 0.00933 | 0.00810 | 0.01585 | 0.01412 | 0.01639 | 0.01623 |
| Q62470 | ITA3_MOUSE  | 0.00000 | 0.00000 | 0.00000 | 0.00000 | 0.00000 | 0.00000 | 0.01894 | 0.02138 | 0.02068 | 0.01613 | 0.02288 | 0.02145 |
| Q62523 | ZYX_MOUSE   | 0.00000 | 0.00000 | 0.00000 | 0.00000 | 0.00000 | 0.00000 | 0.00164 | 0.04071 | 0.06791 | 0.05377 | 0.02905 | 0.03024 |
| Q63810 | CANB1_MOUSE | 0.00000 | 0.00000 | 0.00000 | 0.00000 | 0.00000 | 0.00000 | 0.01153 | 0.01029 | 0.00418 | 0.00718 | 0.00842 | 0.00350 |
| Q63844 | MK03_MOUSE  | 0.00000 | 0.00000 | 0.00000 | 0.00000 | 0.00000 | 0.00000 | 0.03710 | 0.03438 | 0.04995 | 0.03979 | 0.04818 | 0.03579 |
| Q63850 | NUP62_MOUSE | 0.00000 | 0.00000 | 0.00000 | 0.00000 | 0.00000 | 0.00000 | 0.00452 | 0.00180 | 0.00289 | 0.00286 | 0.00354 | 0.00595 |
| Q63870 | CO7A1_MOUSE | 0.00000 | 0.00000 | 0.00000 | 0.00000 | 0.00000 | 0.00000 | 0.01074 | 0.00000 | 0.00000 | 0.00000 | 0.00000 | 0.00108 |

|        |             |         |         |         |         |         |         |         |         |         |         |         |         |
|--------|-------------|---------|---------|---------|---------|---------|---------|---------|---------|---------|---------|---------|---------|
| Q63918 | CAVN2_MOUSE | 0.04591 | 0.03328 | 0.03218 | 0.02928 | 0.04410 | 0.03378 | 0.25435 | 0.29299 | 0.38924 | 0.32721 | 0.42030 | 0.34794 |
| Q63932 | MP2K2_MOUSE | 0.00223 | 0.00151 | 0.00217 | 0.00203 | 0.00157 | 0.00213 | 0.00375 | 0.01167 | 0.01757 | 0.01360 | 0.00825 | 0.01489 |
| Q63961 | EGLN_MOUSE  | 0.00000 | 0.00000 | 0.00000 | 0.00000 | 0.00000 | 0.00000 | 0.00434 | 0.01111 | 0.00662 | 0.00854 | 0.00499 | 0.01276 |
| Q63ZW7 | INADL_MOUSE | 0.00000 | 0.00000 | 0.00000 | 0.00000 | 0.00000 | 0.00000 | 0.00764 | 0.01004 | 0.01445 | 0.00951 | 0.01970 | 0.01486 |
| Q64010 | CRK_MOUSE   | 0.00000 | 0.00000 | 0.00000 | 0.00000 | 0.00000 | 0.00000 | 0.01532 | 0.01162 | 0.01304 | 0.01507 | 0.01485 | 0.01624 |
| Q64012 | RALY_MOUSE  | 0.00000 | 0.00000 | 0.00000 | 0.00000 | 0.00000 | 0.00000 | 0.00104 | 0.00881 | 0.00961 | 0.00720 | 0.00409 | 0.00441 |
| Q640N1 | AEBP1_MOUSE | 0.00000 | 0.00000 | 0.00000 | 0.00000 | 0.00000 | 0.00000 | 0.00135 | 0.00181 | 0.00273 | 0.00042 | 0.00000 | 0.00304 |
| Q64105 | SPRE_MOUSE  | 0.01671 | 0.01183 | 0.01424 | 0.01675 | 0.01292 | 0.01720 | 0.03178 | 0.02400 | 0.02710 | 0.02973 | 0.02331 | 0.04041 |
| Q64133 | AOFA_MOUSE  | 0.00247 | 0.00332 | 0.00145 | 0.00222 | 0.00152 | 0.00172 | 0.02947 | 0.02431 | 0.04114 | 0.02852 | 0.03613 | 0.03026 |
| Q64152 | BTF3_MOUSE  | 0.00000 | 0.00000 | 0.00000 | 0.00000 | 0.00000 | 0.00000 | 0.01556 | 0.00933 | 0.01275 | 0.01088 | 0.01115 | 0.01322 |
| Q64213 | SF01_MOUSE  | 0.00000 | 0.00000 | 0.00000 | 0.00000 | 0.00000 | 0.00000 | 0.00000 | 0.00301 | 0.00207 | 0.00325 | 0.00159 | 0.00493 |
| Q64282 | IFIT1_MOUSE | 0.00000 | 0.00000 | 0.00000 | 0.00000 | 0.00000 | 0.00000 | 0.00000 | 0.00000 | 0.00330 | 0.00091 | 0.00176 | 0.00000 |
| Q64310 | SURF4_MOUSE | 0.00352 | 0.00638 | 0.00955 | 0.00571 | 0.00827 | 0.00715 | 0.01533 | 0.02155 | 0.01121 | 0.01283 | 0.01602 | 0.01143 |
| Q64314 | CD34_MOUSE  | 0.00000 | 0.00000 | 0.00000 | 0.00000 | 0.00000 | 0.00000 | 0.00000 | 0.00825 | 0.01321 | 0.00667 | 0.00459 | 0.00436 |
| Q64324 | STXB2_MOUSE | 0.00000 | 0.00000 | 0.00000 | 0.00000 | 0.00000 | 0.00000 | 0.00625 | 0.00599 | 0.01061 | 0.00918 | 0.00845 | 0.00924 |
| Q64331 | MYO6_MOUSE  | 0.00000 | 0.00000 | 0.00000 | 0.00000 | 0.00000 | 0.00000 | 0.01469 | 0.01158 | 0.01649 | 0.01528 | 0.01413 | 0.01505 |
| Q64337 | SQSTM_MOUSE | 0.00000 | 0.00000 | 0.00000 | 0.00000 | 0.00000 | 0.00000 | 0.00189 | 0.00238 | 0.00628 | 0.00282 | 0.00174 | 0.00398 |
| Q64339 | ISG15_MOUSE | 0.00000 | 0.00000 | 0.00000 | 0.00000 | 0.00000 | 0.00000 | 0.00995 | 0.00891 | 0.00836 | 0.01070 | 0.01676 | 0.00807 |
| Q64345 | IFIT3_MOUSE | 0.00000 | 0.00000 | 0.00000 | 0.00000 | 0.00000 | 0.00000 | 0.00000 | 0.00000 | 0.00000 | 0.00000 | 0.00000 | 0.00926 |
| Q64373 | B2CL1_MOUSE | 0.00000 | 0.00000 | 0.00000 | 0.00000 | 0.00000 | 0.00000 | 0.00150 | 0.00657 | 0.00109 | 0.00163 | 0.00000 | 0.00360 |
| Q64374 | RGN_MOUSE   | 0.00000 | 0.00000 | 0.00000 | 0.00000 | 0.00000 | 0.00000 | 0.00056 | 0.00000 | 0.00000 | 0.00000 | 0.00074 | 0.00000 |
| Q64378 | FKBP5_MOUSE | 0.00000 | 0.00000 | 0.00000 | 0.00000 | 0.00000 | 0.00000 | 0.00641 | 0.00495 | 0.00772 | 0.00574 | 0.00900 | 0.00459 |
| Q64433 | CH10_MOUSE  | 0.00000 | 0.00000 | 0.00000 | 0.00000 | 0.00000 | 0.00000 | 0.02252 | 0.01642 | 0.01312 | 0.01399 | 0.01194 | 0.01390 |
| Q64435 | UD16_MOUSE  | 0.00000 | 0.00000 | 0.00000 | 0.00000 | 0.00000 | 0.00000 | 0.01600 | 0.02030 | 0.01184 | 0.01229 | 0.01453 | 0.01726 |
| Q64437 | ADH7_MOUSE  | 0.00000 | 0.00000 | 0.00000 | 0.00000 | 0.00000 | 0.00000 | 0.02880 | 0.00719 | 0.01148 | 0.00807 | 0.01931 | 0.00855 |
| Q64442 | DHSO_MOUSE  | 0.00187 | 0.00322 | 0.00197 | 0.00205 | 0.00375 | 0.00214 | 0.03518 | 0.02685 | 0.03926 | 0.04184 | 0.04336 | 0.03611 |
| Q64444 | CAH4_MOUSE  | 0.00000 | 0.00000 | 0.00000 | 0.00000 | 0.00000 | 0.00000 | 0.02387 | 0.01679 | 0.02718 | 0.01978 | 0.03587 | 0.02615 |
| Q64449 | MRC2_MOUSE  | 0.00000 | 0.00000 | 0.00000 | 0.00000 | 0.00000 | 0.00000 | 0.02181 | 0.00425 | 0.01991 | 0.00945 | 0.01055 | 0.00674 |
| Q64462 | CP4B1_MOUSE | 0.00000 | 0.00000 | 0.00000 | 0.00000 | 0.00000 | 0.00000 | 0.10502 | 0.07599 | 0.06073 | 0.05564 | 0.07093 | 0.06423 |
| Q64471 | GSTT1_MOUSE | 0.00501 | 0.00576 | 0.00506 | 0.00529 | 0.00439 | 0.00497 | 0.04763 | 0.05438 | 0.06497 | 0.05604 | 0.06400 | 0.05296 |
| Q64511 | TOP2B_MOUSE | 0.00000 | 0.00000 | 0.00000 | 0.00000 | 0.00000 | 0.00000 | 0.01163 | 0.01096 | 0.01180 | 0.01108 | 0.01408 | 0.01254 |
| Q64514 | TPP2_MOUSE  | 0.00207 | 0.00565 | 0.00250 | 0.00243 | 0.00215 | 0.00352 | 0.01195 | 0.00847 | 0.00769 | 0.00865 | 0.00804 | 0.01078 |
| Q64516 | GLPK_MOUSE  | 0.00354 | 0.00774 | 0.00383 | 0.00501 | 0.00542 | 0.00289 | 0.00012 | 0.00004 | 0.00015 | 0.00005 | 0.00000 | 0.00005 |
| Q64518 | AT2A3_MOUSE | 0.00023 | 0.00000 | 0.00000 | 0.00028 | 0.00018 | 0.00000 | 0.04699 | 0.02994 | 0.03075 | 0.03399 | 0.03802 | 0.03523 |





|        |             |         |         |         |         |         |         |         |         |         |         |         |         |
|--------|-------------|---------|---------|---------|---------|---------|---------|---------|---------|---------|---------|---------|---------|
| Q6EDY6 | CARL1_MOUSE | 0.00000 | 0.00000 | 0.00000 | 0.00000 | 0.00000 | 0.00000 | 0.00660 | 0.00948 | 0.00745 | 0.00644 | 0.00891 | 0.00954 |
| Q6GQT9 | NOMO1_MOUSE | 0.00078 | 0.00218 | 0.00087 | 0.00776 | 0.00091 | 0.00135 | 0.00336 | 0.00555 | 0.00873 | 0.00807 | 0.00553 | 0.00580 |
| Q6GV12 | KDSR_MOUSE  | 0.00000 | 0.00000 | 0.00000 | 0.00000 | 0.00000 | 0.00000 | 0.00000 | 0.01124 | 0.00117 | 0.00000 | 0.00160 | 0.00404 |
| Q6GYP7 | RGPA1_MOUSE | 0.00000 | 0.00000 | 0.00000 | 0.00000 | 0.00000 | 0.00000 | 0.02583 | 0.01495 | 0.02938 | 0.01937 | 0.02499 | 0.01890 |
| Q6IRU2 | TPM4_MOUSE  | 0.01870 | 0.00936 | 0.02047 | 0.01770 | 0.01409 | 0.01384 | 0.11677 | 0.12824 | 0.15677 | 0.16726 | 0.13171 | 0.13251 |
| Q6IRU5 | CLCB_MOUSE  | 0.00000 | 0.00000 | 0.00000 | 0.00000 | 0.00000 | 0.00000 | 0.00113 | 0.01730 | 0.02193 | 0.02424 | 0.00944 | 0.00995 |
| Q6KAR6 | EXOC3_MOUSE | 0.00000 | 0.00000 | 0.00000 | 0.00000 | 0.00000 | 0.00000 | 0.00000 | 0.00038 | 0.00107 | 0.00000 | 0.00000 | 0.00000 |
| Q6NSQ9 | G6PC3_MOUSE | 0.00000 | 0.00000 | 0.00000 | 0.00000 | 0.00000 | 0.00000 | 0.00103 | 0.01117 | 0.00050 | 0.00248 | 0.00380 | 0.00380 |
| Q6NSR8 | PEPL1_MOUSE | 0.00055 | 0.00420 | 0.00125 | 0.00065 | 0.00016 | 0.00000 | 0.00000 | 0.01148 | 0.00000 | 0.00322 | 0.00250 | 0.00149 |
| Q6NV83 | SR140_MOUSE | 0.00000 | 0.00000 | 0.00000 | 0.00000 | 0.00000 | 0.00000 | 0.00172 | 0.00456 | 0.00403 | 0.00227 | 0.00515 | 0.00569 |
| Q6NVE8 | WDR44_MOUSE | 0.00000 | 0.00000 | 0.00000 | 0.00000 | 0.00000 | 0.00000 | 0.00264 | 0.00090 | 0.00411 | 0.00165 | 0.00438 | 0.00254 |
| Q6NVF9 | CPSF6_MOUSE | 0.00000 | 0.00000 | 0.00000 | 0.00000 | 0.00000 | 0.00000 | 0.00740 | 0.00608 | 0.00000 | 0.00791 | 0.00698 | 0.00697 |
| Q6NY15 | TSG10_MOUSE | 0.00000 | 0.00000 | 0.00000 | 0.00000 | 0.00000 | 0.00000 | 0.00000 | 0.00428 | 0.00000 | 0.00183 | 0.00000 | 0.00156 |
| Q6NZB0 | DNJC8_MOUSE | 0.00000 | 0.00000 | 0.00000 | 0.00000 | 0.00000 | 0.00000 | 0.00000 | 0.00469 | 0.00152 | 0.00105 | 0.00057 | 0.00044 |
| Q6NZC7 | S23IP_MOUSE | 0.00000 | 0.00000 | 0.00000 | 0.00000 | 0.00000 | 0.00000 | 0.00000 | 0.00000 | 0.00000 | 0.00068 | 0.00000 | 0.00070 |
| Q6NZJ6 | IF4G1_MOUSE | 0.00188 | 0.00103 | 0.00156 | 0.00214 | 0.00317 | 0.00190 | 0.01599 | 0.01039 | 0.01650 | 0.01487 | 0.01683 | 0.01461 |
| Q6P069 | SORCN_MOUSE | 0.00000 | 0.00000 | 0.00000 | 0.00000 | 0.00000 | 0.00000 | 0.02074 | 0.02318 | 0.02658 | 0.02276 | 0.02898 | 0.01970 |
| Q6P1B1 | XPP1_MOUSE  | 0.00434 | 0.00353 | 0.00316 | 0.00297 | 0.00485 | 0.00315 | 0.01042 | 0.00707 | 0.00820 | 0.00887 | 0.00896 | 0.00925 |
| Q6P1F6 | 2ABA_MOUSE  | 0.00132 | 0.00152 | 0.00183 | 0.00389 | 0.00228 | 0.00742 | 0.01001 | 0.01034 | 0.00932 | 0.00980 | 0.00963 | 0.00872 |
| Q6P3A8 | ODBB_MOUSE  | 0.00657 | 0.00275 | 0.01102 | 0.00298 | 0.00378 | 0.03162 | 0.00000 | 0.00000 | 0.00016 | 0.00000 | 0.00023 | 0.00017 |
| Q6P3D0 | NUD16_MOUSE | 0.00000 | 0.00000 | 0.00000 | 0.00000 | 0.00000 | 0.00000 | 0.00062 | 0.00221 | 0.00000 | 0.00075 | 0.00000 | 0.00000 |
| Q6P4T2 | U520_MOUSE  | 0.00000 | 0.00000 | 0.00000 | 0.00000 | 0.00000 | 0.00000 | 0.02079 | 0.01868 | 0.01860 | 0.01768 | 0.01910 | 0.02293 |
| Q6P542 | ABCF1_MOUSE | 0.00150 | 0.00150 | 0.00089 | 0.00128 | 0.00107 | 0.00168 | 0.07153 | 0.05478 | 0.09893 | 0.06456 | 0.13372 | 0.06542 |
| Q6P5D4 | CP135_MOUSE | 0.00000 | 0.00000 | 0.00000 | 0.00000 | 0.00000 | 0.00000 | 0.00000 | 0.00267 | 0.00134 | 0.00142 | 0.00273 | 0.00074 |
| Q6P5E4 | UGGG1_MOUSE | 0.00000 | 0.00000 | 0.00000 | 0.00000 | 0.00000 | 0.00000 | 0.02174 | 0.02434 | 0.02273 | 0.02446 | 0.02286 | 0.02296 |
| Q6P5F9 | XPO1_MOUSE  | 0.01396 | 0.00147 | 0.01053 | 0.00955 | 0.00990 | 0.00790 | 0.00787 | 0.01249 | 0.01656 | 0.01484 | 0.01290 | 0.00970 |
| Q6P5H2 | NEST_MOUSE  | 0.00000 | 0.00000 | 0.00000 | 0.00000 | 0.00000 | 0.00000 | 0.00545 | 0.01155 | 0.01088 | 0.00861 | 0.00381 | 0.00985 |
| Q6P6M5 | PX11C_MOUSE | 0.00000 | 0.00000 | 0.00000 | 0.00000 | 0.00000 | 0.00000 | 0.00000 | 0.00000 | 0.00000 | 0.00000 | 0.00000 | 0.00409 |
| Q6P8I4 | PCNP_MOUSE  | 0.00000 | 0.00000 | 0.00000 | 0.00000 | 0.00000 | 0.00000 | 0.00000 | 0.00116 | 0.00641 | 0.00464 | 0.00320 | 0.00156 |
| Q6P8J2 | SAT2_MOUSE  | 0.00000 | 0.00000 | 0.00000 | 0.00000 | 0.00000 | 0.00000 | 0.00000 | 0.00000 | 0.00000 | 0.00000 | 0.00000 | 0.00000 |
| Q6P8J7 | KCRS_MOUSE  | 1.48756 | 1.48302 | 1.39633 | 1.42533 | 1.42860 | 1.45937 | 0.05127 | 0.05535 | 0.03288 | 0.05818 | 0.03229 | 0.03217 |
| Q6P8X1 | SNX6_MOUSE  | 0.00000 | 0.00000 | 0.00000 | 0.00000 | 0.00000 | 0.00000 | 0.01702 | 0.01468 | 0.02089 | 0.01935 | 0.01918 | 0.01521 |
| Q6P9J5 | KANK4_MOUSE | 0.00000 | 0.00000 | 0.00000 | 0.00000 | 0.00000 | 0.00000 | 0.00592 | 0.00540 | 0.00807 | 0.00617 | 0.00944 | 0.00770 |
| Q6P9J9 | ANO6_MOUSE  | 0.00000 | 0.00000 | 0.00000 | 0.00000 | 0.00000 | 0.00000 | 0.00533 | 0.00640 | 0.00937 | 0.00496 | 0.00700 | 0.00701 |



|        |             |         |         |         |         |         |         |         |         |         |         |         |         |
|--------|-------------|---------|---------|---------|---------|---------|---------|---------|---------|---------|---------|---------|---------|
| Q6P9Q4 | FHOD1_MOUSE | 0.00000 | 0.00000 | 0.00000 | 0.00000 | 0.00000 | 0.00000 | 0.01574 | 0.01869 | 0.01785 | 0.01680 | 0.01384 | 0.01575 |
| Q6P9Q6 | FKB15_MOUSE | 0.00000 | 0.00000 | 0.00000 | 0.00000 | 0.00000 | 0.00000 | 0.00449 | 0.00586 | 0.00560 | 0.00605 | 0.00562 | 0.00735 |
| Q6P9R2 | OXSR1_MOUSE | 0.00000 | 0.00000 | 0.00000 | 0.00000 | 0.00000 | 0.00000 | 0.01296 | 0.01144 | 0.01189 | 0.01242 | 0.01149 | 0.01062 |
| Q6P9R4 | ARHGI_MOUSE | 0.00000 | 0.00000 | 0.00000 | 0.00000 | 0.00000 | 0.00000 | 0.00212 | 0.00526 | 0.00000 | 0.00000 | 0.00303 | 0.00000 |
| Q6PA06 | ATLA2_MOUSE | 0.00000 | 0.00000 | 0.00000 | 0.00000 | 0.00000 | 0.00000 | 0.00175 | 0.00105 | 0.00124 | 0.00203 | 0.00086 | 0.00154 |
| Q6PAM1 | TXLNA_MOUSE | 0.00000 | 0.00000 | 0.00000 | 0.00000 | 0.00000 | 0.00000 | 0.00000 | 0.00156 | 0.00337 | 0.00290 | 0.00138 | 0.00092 |
| Q6PAR5 | GAPD1_MOUSE | 0.00000 | 0.00000 | 0.00000 | 0.00000 | 0.00000 | 0.00000 | 0.00000 | 0.00420 | 0.00185 | 0.00000 | 0.00307 | 0.00128 |
| Q6PAV2 | HERC4_MOUSE | 0.00000 | 0.00000 | 0.00000 | 0.00000 | 0.00000 | 0.00000 | 0.00000 | 0.00024 | 0.00244 | 0.00087 | 0.00145 | 0.00135 |
| Q6PB44 | PTN23_MOUSE | 0.00000 | 0.00000 | 0.00000 | 0.00000 | 0.00000 | 0.00000 | 0.00122 | 0.00322 | 0.00264 | 0.00248 | 0.00137 | 0.00357 |
| Q6PB66 | LPPRC_MOUSE | 0.06967 | 0.12371 | 0.07715 | 0.07365 | 0.08173 | 0.08286 | 0.01005 | 0.00605 | 0.00676 | 0.00674 | 0.00793 | 0.00696 |
| Q6PB93 | GALT2_MOUSE | 0.00000 | 0.00000 | 0.00000 | 0.00000 | 0.00000 | 0.00000 | 0.00579 | 0.00431 | 0.00591 | 0.00466 | 0.00692 | 0.00524 |
| Q6PCP5 | MFF_MOUSE   | 0.00000 | 0.00000 | 0.00000 | 0.00000 | 0.00000 | 0.00000 | 0.00226 | 0.00586 | 0.00718 | 0.00661 | 0.00898 | 0.00712 |
| Q6PD03 | 2A5A_MOUSE  | 0.00345 | 0.00728 | 0.00405 | 0.00682 | 0.00440 | 0.00626 | 0.00842 | 0.00692 | 0.00468 | 0.00513 | 0.00169 | 0.00786 |
| Q6PDG5 | SMRC2_MOUSE | 0.00000 | 0.00000 | 0.00000 | 0.00000 | 0.00000 | 0.00000 | 0.00355 | 0.00930 | 0.00597 | 0.00793 | 0.00510 | 0.00884 |
| Q6PDH0 | PHLB1_MOUSE | 0.00000 | 0.00000 | 0.00000 | 0.00000 | 0.00000 | 0.00000 | 0.00663 | 0.00555 | 0.00467 | 0.00198 | 0.00667 | 0.00567 |
| Q6PDI5 | ECM29_MOUSE | 0.02205 | 0.03157 | 0.01208 | 0.01702 | 0.01512 | 0.03432 | 0.00000 | 0.00213 | 0.01435 | 0.00354 | 0.00000 | 0.00000 |
| Q6PDI6 | MINY2_MOUSE | 0.00000 | 0.00000 | 0.00000 | 0.00000 | 0.00000 | 0.00000 | 0.00000 | 0.00000 | 0.00202 | 0.00092 | 0.00060 | 0.00054 |
| Q6PDL0 | DC1L2_MOUSE | 0.00000 | 0.00000 | 0.00000 | 0.00000 | 0.00000 | 0.00000 | 0.01489 | 0.01526 | 0.01633 | 0.01446 | 0.01305 | 0.01242 |
| Q6PDM2 | SRSF1_MOUSE | 0.00000 | 0.00000 | 0.00000 | 0.00000 | 0.00000 | 0.00000 | 0.01375 | 0.01981 | 0.02703 | 0.01957 | 0.02120 | 0.02627 |
| Q6PDN3 | MYLK_MOUSE  | 0.00000 | 0.00000 | 0.00000 | 0.00000 | 0.00000 | 0.00000 | 0.05483 | 0.04547 | 0.04618 | 0.04860 | 0.05075 | 0.05377 |
| Q6PDQ2 | CHD4_MOUSE  | 0.00000 | 0.00000 | 0.00000 | 0.00000 | 0.00000 | 0.00000 | 0.00658 | 0.01533 | 0.01167 | 0.01074 | 0.01555 | 0.01287 |
| Q6PE01 | SNR40_MOUSE | 0.00000 | 0.00000 | 0.00000 | 0.00000 | 0.00000 | 0.00000 | 0.00168 | 0.00237 | 0.00332 | 0.00149 | 0.00340 | 0.00156 |
| Q6PEE3 | RIR2B_MOUSE | 0.00000 | 0.00000 | 0.00000 | 0.00000 | 0.00000 | 0.00000 | 0.00000 | 0.00299 | 0.00000 | 0.00000 | 0.00000 | 0.00000 |
| Q6PER3 | MARE3_MOUSE | 0.00157 | 0.00167 | 0.00141 | 0.00175 | 0.00264 | 0.00213 | 0.00518 | 0.00732 | 0.00839 | 0.00685 | 0.00547 | 0.00699 |
| Q6PFD9 | NUP98_MOUSE | 0.00000 | 0.00000 | 0.00000 | 0.00000 | 0.00000 | 0.00000 | 0.00000 | 0.00315 | 0.00402 | 0.00455 | 0.00174 | 0.00573 |
| Q6PFR5 | TRA2A_MOUSE | 0.00000 | 0.00000 | 0.00000 | 0.00000 | 0.00000 | 0.00000 | 0.00270 | 0.01197 | 0.00463 | 0.00743 | 0.00731 | 0.01086 |
| Q6PGB6 | NAA50_MOUSE | 0.00000 | 0.00000 | 0.00000 | 0.00000 | 0.00000 | 0.00000 | 0.00000 | 0.00340 | 0.00157 | 0.00298 | 0.00132 | 0.00000 |
| Q6PGF7 | EXOC8_MOUSE | 0.00000 | 0.00000 | 0.00000 | 0.00000 | 0.00000 | 0.00000 | 0.00000 | 0.00240 | 0.00342 | 0.00214 | 0.00084 | 0.00145 |
| Q6PGH1 | BUD31_MOUSE | 0.00000 | 0.00000 | 0.00000 | 0.00000 | 0.00000 | 0.00000 | 0.00370 | 0.00206 | 0.00312 | 0.00254 | 0.00393 | 0.00346 |
| Q6PGL7 | WASC2_MOUSE | 0.00000 | 0.00000 | 0.00000 | 0.00000 | 0.00000 | 0.00000 | 0.00575 | 0.00421 | 0.00628 | 0.00334 | 0.00562 | 0.00582 |
| Q6PHN9 | RAB35_MOUSE | 0.00237 | 0.00107 | 0.00176 | 0.00243 | 0.00116 | 0.00154 | 0.01796 | 0.01828 | 0.02089 | 0.02016 | 0.01620 | 0.02133 |
| Q6PHU5 | SORT_MOUSE  | 0.00000 | 0.00000 | 0.00000 | 0.00000 | 0.00000 | 0.00000 | 0.00772 | 0.01311 | 0.01492 | 0.01080 | 0.01518 | 0.01522 |
| Q6PHZ2 | KCC2D_MOUSE | 0.01285 | 0.01421 | 0.02409 | 0.01250 | 0.01405 | 0.01507 | 0.03145 | 0.02927 | 0.02792 | 0.02813 | 0.02692 | 0.03206 |
| Q6PIE5 | AT1A2_MOUSE | 0.01252 | 0.01437 | 0.00638 | 0.00921 | 0.00815 | 0.01030 | 0.00940 | 0.00578 | 0.00633 | 0.00182 | 0.00753 | 0.00534 |

|        |             |         |         |         |         |         |         |         |         |         |         |         |         |
|--------|-------------|---------|---------|---------|---------|---------|---------|---------|---------|---------|---------|---------|---------|
| Q6PIP5 | NUDC1_MOUSE | 0.00000 | 0.00000 | 0.00000 | 0.00000 | 0.00000 | 0.00000 | 0.00000 | 0.00664 | 0.00451 | 0.00568 | 0.00000 | 0.00000 |
| Q6PIU9 | YJ005_MOUSE | 0.00460 | 0.00183 | 0.00090 | 0.00066 | 0.00119 | 0.00075 | 0.01157 | 0.00875 | 0.00608 | 0.00773 | 0.00660 | 0.00926 |
| Q6Q477 | AT2B4_MOUSE | 0.00350 | 0.00229 | 0.00313 | 0.00353 | 0.00329 | 0.00151 | 0.00461 | 0.00759 | 0.00887 | 0.00721 | 0.00193 | 0.00619 |
| Q6Q899 | DDX58_MOUSE | 0.00000 | 0.00000 | 0.00000 | 0.00000 | 0.00000 | 0.00000 | 0.00869 | 0.00831 | 0.01027 | 0.00857 | 0.01144 | 0.00879 |
| Q6R891 | NEB2_MOUSE  | 0.00000 | 0.00000 | 0.00000 | 0.00000 | 0.00000 | 0.00000 | 0.00000 | 0.00035 | 0.00160 | 0.00000 | 0.00000 | 0.00180 |
| Q6RHR9 | MAGI1_MOUSE | 0.00000 | 0.00000 | 0.00000 | 0.00000 | 0.00000 | 0.00000 | 0.00505 | 0.00175 | 0.00449 | 0.00276 | 0.00482 | 0.00492 |
| Q6URW6 | MYH14_MOUSE | 0.01448 | 0.01425 | 0.00965 | 0.01790 | 0.00995 | 0.01132 | 0.38966 | 0.47341 | 0.43151 | 0.40908 | 0.40362 | 0.42654 |
| Q6WKZ7 | NOSTN_MOUSE | 0.00000 | 0.00000 | 0.00000 | 0.00000 | 0.00000 | 0.00000 | 0.00158 | 0.00332 | 0.00232 | 0.00087 | 0.00000 | 0.00255 |
| Q6WVG3 | KCD12_MOUSE | 0.00000 | 0.00000 | 0.00000 | 0.00000 | 0.00000 | 0.00000 | 0.02147 | 0.01607 | 0.02184 | 0.01861 | 0.01997 | 0.02678 |
| Q6ZPF4 | FMNL3_MOUSE | 0.00000 | 0.00000 | 0.00000 | 0.00000 | 0.00000 | 0.00000 | 0.00511 | 0.00242 | 0.00439 | 0.00348 | 0.00430 | 0.00326 |
| Q6ZPJ3 | UBE2O_MOUSE | 0.00000 | 0.00000 | 0.00000 | 0.00000 | 0.00000 | 0.00000 | 0.00000 | 0.00000 | 0.00083 | 0.00094 | 0.00259 | 0.00080 |
| Q6ZPQ6 | PITM2_MOUSE | 0.00000 | 0.00000 | 0.00000 | 0.00000 | 0.00000 | 0.00000 | 0.00000 | 0.00090 | 0.00064 | 0.00153 | 0.00092 | 0.00083 |
| Q6ZQ08 | CNOT1_MOUSE | 0.00000 | 0.00000 | 0.00000 | 0.00000 | 0.00000 | 0.00000 | 0.02380 | 0.02885 | 0.02387 | 0.02876 | 0.02352 | 0.02557 |
| Q6ZQ38 | CAND1_MOUSE | 0.00178 | 0.00097 | 0.00282 | 0.00193 | 0.00153 | 0.00111 | 0.02675 | 0.01835 | 0.02995 | 0.02401 | 0.03508 | 0.02736 |
| Q6ZQ82 | RHG26_MOUSE | 0.00000 | 0.00000 | 0.00000 | 0.00000 | 0.00000 | 0.00000 | 0.00000 | 0.00174 | 0.00092 | 0.00261 | 0.00544 | 0.00135 |
| Q6ZQI3 | MLEC_MOUSE  | 0.00000 | 0.00000 | 0.00000 | 0.00000 | 0.00000 | 0.00000 | 0.00650 | 0.01396 | 0.01018 | 0.01323 | 0.00993 | 0.01232 |
| Q6ZQK5 | ACAP2_MOUSE | 0.00000 | 0.00000 | 0.00000 | 0.00000 | 0.00000 | 0.00000 | 0.01115 | 0.01129 | 0.00834 | 0.00801 | 0.00734 | 0.01154 |
| Q6ZQM8 | UD17C_MOUSE | 0.00000 | 0.00000 | 0.00000 | 0.00000 | 0.00000 | 0.00000 | 0.01054 | 0.01849 | 0.01070 | 0.01290 | 0.01109 | 0.01092 |
| Q6ZWM4 | LSM8_MOUSE  | 0.00000 | 0.00000 | 0.00000 | 0.00000 | 0.00000 | 0.00000 | 0.00386 | 0.00341 | 0.00250 | 0.00419 | 0.00483 | 0.00233 |
| Q6ZWN5 | RS9_MOUSE   | 0.00000 | 0.00000 | 0.00000 | 0.00000 | 0.00000 | 0.00000 | 0.01446 | 0.03074 | 0.02164 | 0.02294 | 0.01334 | 0.02147 |
| Q6ZWQ0 | SYNE2_MOUSE | 0.00000 | 0.00000 | 0.00000 | 0.00000 | 0.00000 | 0.00000 | 0.00364 | 0.00373 | 0.00642 | 0.00381 | 0.00604 | 0.00518 |
| Q6ZWQ7 | SPCS3_MOUSE | 0.00000 | 0.00000 | 0.00000 | 0.00000 | 0.00000 | 0.00000 | 0.00582 | 0.00833 | 0.00404 | 0.00474 | 0.00255 | 0.00659 |
| Q6ZWR6 | SYNE1_MOUSE | 0.00000 | 0.00000 | 0.00000 | 0.00000 | 0.00000 | 0.00000 | 0.01655 | 0.03481 | 0.04093 | 0.03634 | 0.05728 | 0.04106 |
| Q6ZWU9 | RS27_MOUSE  | 0.00000 | 0.00000 | 0.00000 | 0.00000 | 0.00000 | 0.00000 | 0.16489 | 0.04089 | 0.03796 | 0.04362 | 0.18993 | 0.03509 |
| Q6ZWV3 | RL10_MOUSE  | 0.00000 | 0.00000 | 0.00000 | 0.00000 | 0.00000 | 0.00000 | 0.02258 | 0.01557 | 0.01323 | 0.01143 | 0.00961 | 0.01374 |
| Q6ZWV7 | RL35_MOUSE  | 0.00000 | 0.00000 | 0.00000 | 0.00000 | 0.00000 | 0.00000 | 0.00000 | 0.00706 | 0.00809 | 0.00765 | 0.00247 | 0.00379 |
| Q6ZWX6 | IF2A_MOUSE  | 0.00000 | 0.00000 | 0.00000 | 0.00000 | 0.00000 | 0.00000 | 0.00860 | 0.01297 | 0.02419 | 0.01998 | 0.02401 | 0.01628 |
| Q6ZWY3 | RS27L_MOUSE | 0.00000 | 0.00000 | 0.00000 | 0.00000 | 0.00000 | 0.00000 | 0.01292 | 0.01109 | 0.01462 | 0.01229 | 0.01121 | 0.01344 |
| Q70IV5 | SYNEM_MOUSE | 0.00000 | 0.00000 | 0.00000 | 0.00000 | 0.00000 | 0.00000 | 0.01583 | 0.01441 | 0.02127 | 0.01640 | 0.01810 | 0.01837 |
| Q70KF4 | CMYA5_MOUSE | 0.01074 | 0.01113 | 0.00886 | 0.00869 | 0.00672 | 0.00717 | 0.00852 | 0.02227 | 0.03425 | 0.02615 | 0.02431 | 0.02948 |
| Q71LX4 | TLN2_MOUSE  | 0.08249 | 0.07519 | 0.07704 | 0.06482 | 0.06811 | 0.06091 | 0.02103 | 0.01877 | 0.01956 | 0.01742 | 0.02135 | 0.01941 |
| Q71RI9 | KAT3_MOUSE  | 0.01828 | 0.01917 | 0.02302 | 0.01111 | 0.01787 | 0.01643 | 0.00860 | 0.00802 | 0.00107 | 0.00296 | 0.00250 | 0.00443 |
| Q75N62 | GIMA8_MOUSE | 0.00000 | 0.00000 | 0.00000 | 0.00000 | 0.00000 | 0.00000 | 0.00000 | 0.00000 | 0.00085 | 0.00000 | 0.00040 | 0.00034 |
| Q76LS9 | MINY1_MOUSE | 0.00000 | 0.00000 | 0.00000 | 0.00000 | 0.00000 | 0.00000 | 0.00000 | 0.00160 | 0.00665 | 0.00410 | 0.00439 | 0.00204 |

|        |             |         |         |         |         |         |         |         |         |         |         |         |         |
|--------|-------------|---------|---------|---------|---------|---------|---------|---------|---------|---------|---------|---------|---------|
| Q76MZ3 | 2AAA_MOUSE  | 0.00499 | 0.00231 | 0.02644 | 0.00452 | 0.00932 | 0.00617 | 0.04847 | 0.04111 | 0.06514 | 0.05676 | 0.07265 | 0.05087 |
| Q78HU7 | GLPC_MOUSE  | 0.00000 | 0.00000 | 0.00000 | 0.00000 | 0.00000 | 0.00000 | 0.01062 | 0.00000 | 0.00241 | 0.00730 | 0.01336 | 0.00420 |
| Q78IK2 | ATPMD_MOUSE | 0.00000 | 0.00000 | 0.00000 | 0.00000 | 0.00000 | 0.00000 | 0.04129 | 0.04633 | 0.03463 | 0.04854 | 0.02977 | 0.02244 |
| Q78IK4 | MIC27_MOUSE | 0.01990 | 0.02467 | 0.01576 | 0.04948 | 0.01895 | 0.04284 | 0.00000 | 0.00604 | 0.00479 | 0.00558 | 0.00233 | 0.00572 |
| Q78IQ7 | S39A4_MOUSE | 0.00000 | 0.00000 | 0.00000 | 0.00000 | 0.00000 | 0.00000 | 0.00904 | 0.00764 | 0.00685 | 0.00758 | 0.00321 | 0.00924 |
| Q78IS1 | TMED3_MOUSE | 0.00000 | 0.00000 | 0.00000 | 0.00000 | 0.00000 | 0.00000 | 0.01134 | 0.00936 | 0.01440 | 0.01119 | 0.01311 | 0.00987 |
| Q78JE5 | FBX22_MOUSE | 0.00000 | 0.00000 | 0.00000 | 0.00000 | 0.00000 | 0.00000 | 0.00078 | 0.00411 | 0.00183 | 0.00503 | 0.00224 | 0.00513 |
| Q78JN3 | ECI3_MOUSE  | 0.00000 | 0.00000 | 0.00000 | 0.00000 | 0.00000 | 0.00000 | 0.00000 | 0.00000 | 0.00000 | 0.00000 | 0.00000 | 0.00000 |
| Q78JT3 | 3HAO_MOUSE  | 0.00000 | 0.00000 | 0.00000 | 0.00000 | 0.00000 | 0.00000 | 0.00000 | 0.00007 | 0.00006 | 0.00003 | 0.00008 | 0.00016 |
| Q78KK3 | S22AI_MOUSE | 0.00000 | 0.00000 | 0.00000 | 0.00000 | 0.00000 | 0.00000 | 0.00000 | 0.00000 | 0.00000 | 0.00000 | 0.00000 | 0.00000 |
| Q78PY7 | SND1_MOUSE  | 0.00089 | 0.00310 | 0.00107 | 0.00109 | 0.00184 | 0.00209 | 0.02798 | 0.04804 | 0.06150 | 0.05302 | 0.05376 | 0.04736 |
| Q78YZ6 | SCOC_MOUSE  | 0.00000 | 0.00000 | 0.00000 | 0.00000 | 0.00000 | 0.00000 | 0.00047 | 0.00000 | 0.00226 | 0.00217 | 0.00287 | 0.00104 |
| Q78ZA7 | NP1L4_MOUSE | 0.00742 | 0.00657 | 0.00473 | 0.00241 | 0.00439 | 0.00262 | 0.02989 | 0.04359 | 0.04359 | 0.04469 | 0.04325 | 0.04393 |
| Q791T5 | MTCH1_MOUSE | 0.00000 | 0.00000 | 0.00000 | 0.00000 | 0.00000 | 0.00000 | 0.00000 | 0.00360 | 0.00000 | 0.00180 | 0.00162 | 0.00438 |
| Q791V5 | MTCH2_MOUSE | 0.02429 | 0.03419 | 0.03544 | 0.04302 | 0.03469 | 0.05535 | 0.01087 | 0.01464 | 0.01114 | 0.01318 | 0.02225 | 0.01205 |
| Q7M6Y3 | PICAL_MOUSE | 0.00000 | 0.00000 | 0.00000 | 0.00000 | 0.00000 | 0.00000 | 0.02709 | 0.01137 | 0.02208 | 0.01811 | 0.02985 | 0.01417 |
| Q7M6Z4 | KIF27_MOUSE | 0.00000 | 0.00000 | 0.00000 | 0.00000 | 0.00000 | 0.00000 | 0.10118 | 0.00460 | 0.02148 | 0.05211 | 0.12681 | 0.00423 |
| Q7M757 | BRC3L_MOUSE | 0.00000 | 0.00000 | 0.00000 | 0.00000 | 0.00000 | 0.00000 | 0.00153 | 0.01370 | 0.00811 | 0.01081 | 0.00471 | 0.00602 |
| Q7SIG6 | ASAP2_MOUSE | 0.00000 | 0.00000 | 0.00000 | 0.00000 | 0.00000 | 0.00000 | 0.00064 | 0.00195 | 0.00166 | 0.00208 | 0.00057 | 0.00000 |
| Q7TMB8 | CYFP1_MOUSE | 0.00000 | 0.00000 | 0.00000 | 0.00000 | 0.00000 | 0.00000 | 0.01673 | 0.02042 | 0.01453 | 0.01343 | 0.01610 | 0.01676 |
| Q7TMF3 | NDUAC_MOUSE | 0.14034 | 0.10020 | 0.10182 | 0.08248 | 0.10343 | 0.07312 | 0.00664 | 0.00341 | 0.00374 | 0.00223 | 0.00322 | 0.00241 |
| Q7TMK9 | HNRPQ_MOUSE | 0.00000 | 0.00000 | 0.00000 | 0.00000 | 0.00000 | 0.00000 | 0.02619 | 0.02138 | 0.02736 | 0.02438 | 0.03413 | 0.02831 |
| Q7TMM9 | TBB2A_MOUSE | 0.00000 | 0.00000 | 0.00000 | 0.00000 | 0.00000 | 0.00000 | 0.07178 | 0.08224 | 0.08436 | 0.08058 | 0.06723 | 0.10309 |
| Q7TMR0 | PCP_MOUSE   | 0.00000 | 0.00000 | 0.00000 | 0.00000 | 0.00000 | 0.00000 | 0.00287 | 0.00000 | 0.00056 | 0.00071 | 0.00000 | 0.00383 |
| Q7TMS5 | ABCG2_MOUSE | 0.00000 | 0.00000 | 0.00000 | 0.00000 | 0.00000 | 0.00000 | 0.00000 | 0.00000 | 0.00027 | 0.00020 | 0.00000 | 0.00012 |
| Q7TMY8 | HUWE1_MOUSE | 0.00218 | 0.00150 | 0.00231 | 0.00164 | 0.00080 | 0.00257 | 0.00644 | 0.00510 | 0.00669 | 0.00673 | 0.00754 | 0.01019 |
| Q7TN29 | SMAP2_MOUSE | 0.00000 | 0.00000 | 0.00000 | 0.00000 | 0.00000 | 0.00000 | 0.00000 | 0.00000 | 0.00000 | 0.00000 | 0.00000 | 0.00000 |
| Q7TNC4 | LC7L2_MOUSE | 0.00000 | 0.00000 | 0.00000 | 0.00000 | 0.00000 | 0.00000 | 0.01529 | 0.01022 | 0.01598 | 0.01382 | 0.01181 | 0.01230 |
| Q7TNE1 | SUCHY_MOUSE | 0.00000 | 0.00000 | 0.00000 | 0.00000 | 0.00000 | 0.00000 | 0.00000 | 0.00064 | 0.00000 | 0.00000 | 0.00000 | 0.00000 |
| Q7TNG5 | EMAL2_MOUSE | 0.00716 | 0.00531 | 0.00259 | 0.00456 | 0.00421 | 0.01073 | 0.03740 | 0.02282 | 0.02305 | 0.01653 | 0.01061 | 0.01235 |
| Q7TNG8 | LDHD_MOUSE  | 0.00000 | 0.00000 | 0.00000 | 0.00000 | 0.00000 | 0.00000 | 0.00020 | 0.00000 | 0.00000 | 0.00004 | 0.00000 | 0.00004 |
| Q7TNP2 | 2AAB_MOUSE  | 0.00000 | 0.00000 | 0.00000 | 0.00000 | 0.00000 | 0.00000 | 0.00000 | 0.00000 | 0.00000 | 0.00000 | 0.00000 | 0.00000 |
| Q7TNV0 | DEK_MOUSE   | 0.00000 | 0.00000 | 0.00000 | 0.00000 | 0.00000 | 0.00000 | 0.02402 | 0.05295 | 0.01670 | 0.02479 | 0.01199 | 0.02686 |
| Q7TPD0 | INT3_MOUSE  | 0.00000 | 0.00000 | 0.00000 | 0.00000 | 0.00000 | 0.00000 | 0.00294 | 0.00054 | 0.00396 | 0.00266 | 0.00432 | 0.00343 |

|        |             |         |         |         |         |         |         |         |         |         |         |         |         |
|--------|-------------|---------|---------|---------|---------|---------|---------|---------|---------|---------|---------|---------|---------|
| Q7TPR4 | ACTN1_MOUSE | 0.04380 | 0.03212 | 0.02462 | 0.02449 | 0.03542 | 0.03820 | 0.09309 | 0.07767 | 0.09460 | 0.08811 | 0.08476 | 0.08577 |
| Q7TPV4 | MBB1A_MOUSE | 0.00000 | 0.00000 | 0.00000 | 0.00000 | 0.00000 | 0.00000 | 0.00356 | 0.00377 | 0.00659 | 0.00383 | 0.00414 | 0.00446 |
| Q7TPW1 | NEXN_MOUSE  | 0.00507 | 0.00171 | 0.00237 | 0.00307 | 0.00538 | 0.00426 | 0.00000 | 0.00183 | 0.00343 | 0.00431 | 0.00247 | 0.00306 |
| Q7TQ48 | SRCA_MOUSE  | 0.62070 | 0.51275 | 0.76808 | 0.44009 | 0.74757 | 0.63688 | 0.04417 | 0.01858 | 0.02095 | 0.02390 | 0.02038 | 0.01706 |
| Q7TQ95 | LNP_MOUSE   | 0.00000 | 0.00000 | 0.00000 | 0.00000 | 0.00000 | 0.00000 | 0.00133 | 0.00267 | 0.00296 | 0.00314 | 0.00166 | 0.00313 |
| Q7TQF7 | AMPH_MOUSE  | 0.00000 | 0.00000 | 0.00000 | 0.00000 | 0.00000 | 0.00000 | 0.00290 | 0.00522 | 0.00354 | 0.00431 | 0.00568 | 0.00493 |
| Q7TQH0 | ATX2L_MOUSE | 0.00000 | 0.00000 | 0.00000 | 0.00000 | 0.00000 | 0.00000 | 0.00000 | 0.00000 | 0.00296 | 0.00577 | 0.00311 | 0.00112 |
| Q7TQI3 | OTUB1_MOUSE | 0.00914 | 0.01002 | 0.00462 | 0.00530 | 0.00405 | 0.00726 | 0.01940 | 0.02193 | 0.02801 | 0.02622 | 0.01749 | 0.02507 |
| Q7TR96 | O1013_MOUSE | 0.00000 | 0.00000 | 0.00000 | 0.00000 | 0.00000 | 0.00000 | 0.02080 | 0.10595 | 0.12678 | 0.13325 | 0.08610 | 0.04958 |
| Q7TSE6 | ST38L_MOUSE | 0.00000 | 0.00000 | 0.00000 | 0.00000 | 0.00000 | 0.00000 | 0.00112 | 0.00127 | 0.00269 | 0.00171 | 0.00232 | 0.00186 |
| Q7TSI3 | PP6R1_MOUSE | 0.00000 | 0.00000 | 0.00000 | 0.00000 | 0.00000 | 0.00000 | 0.00000 | 0.00149 | 0.00289 | 0.00242 | 0.00203 | 0.00162 |
| Q7TSJ2 | MAP6_MOUSE  | 0.00000 | 0.00000 | 0.00000 | 0.00000 | 0.00000 | 0.00000 | 0.00000 | 0.00249 | 0.00206 | 0.00278 | 0.00199 | 0.00086 |
| Q7TSQ8 | PDPR_MOUSE  | 0.00043 | 0.00059 | 0.00125 | 0.00027 | 0.00050 | 0.00027 | 0.00192 | 0.00448 | 0.00440 | 0.00280 | 0.00438 | 0.00259 |
| Q7TST5 | LAMP3_MOUSE | 0.00000 | 0.00000 | 0.00000 | 0.00000 | 0.00000 | 0.00000 | 0.00000 | 0.00399 | 0.00251 | 0.00000 | 0.00114 | 0.00178 |
| Q7TSV4 | PGM2_MOUSE  | 0.00000 | 0.00000 | 0.00000 | 0.00000 | 0.00000 | 0.00000 | 0.01255 | 0.02532 | 0.02781 | 0.02353 | 0.01508 | 0.02195 |
| Q7TT37 | ELP1_MOUSE  | 0.00000 | 0.00000 | 0.00000 | 0.00000 | 0.00000 | 0.00000 | 0.00515 | 0.00838 | 0.00507 | 0.00948 | 0.00558 | 0.01040 |
| Q7TT50 | MRCKB_MOUSE | 0.00000 | 0.00000 | 0.00000 | 0.00000 | 0.00000 | 0.00000 | 0.00571 | 0.00459 | 0.00740 | 0.00629 | 0.00771 | 0.00619 |
| Q80SU6 | NPT2C_MOUSE | 0.00000 | 0.00000 | 0.00000 | 0.00000 | 0.00000 | 0.00000 | 0.00000 | 0.00000 | 0.00000 | 0.00000 | 0.00000 | 0.00000 |
| Q80SU7 | GVIN1_MOUSE | 0.00000 | 0.00000 | 0.00000 | 0.00000 | 0.00000 | 0.00000 | 0.00486 | 0.00305 | 0.00650 | 0.00516 | 0.00310 | 0.00372 |
| Q80SW1 | SAHH2_MOUSE | 0.00180 | 0.00187 | 0.00199 | 0.00108 | 0.00175 | 0.00181 | 0.00000 | 0.00234 | 0.00000 | 0.00000 | 0.00000 | 0.00142 |
| Q80SY3 | VA0D2_MOUSE | 0.00000 | 0.00000 | 0.00000 | 0.00000 | 0.00000 | 0.00000 | 0.00000 | 0.00000 | 0.00000 | 0.00000 | 0.00000 | 0.00000 |
| Q80SZ7 | GBG5_MOUSE  | 0.00000 | 0.00000 | 0.00000 | 0.00000 | 0.00000 | 0.00000 | 0.00000 | 0.00789 | 0.00605 | 0.00758 | 0.00290 | 0.00373 |
| Q80TA6 | MTMRC_MOUSE | 0.00000 | 0.00000 | 0.00000 | 0.00000 | 0.00000 | 0.00000 | 0.00000 | 0.00349 | 0.00000 | 0.00000 | 0.00192 | 0.00000 |
| Q80TH2 | ERBIN_MOUSE | 0.00205 | 0.00526 | 0.00265 | 0.00269 | 0.00230 | 0.00173 | 0.00686 | 0.00908 | 0.01052 | 0.01003 | 0.01067 | 0.01259 |
| Q80TL7 | MON2_MOUSE  | 0.00000 | 0.00000 | 0.00000 | 0.00000 | 0.00000 | 0.00000 | 0.00000 | 0.00155 | 0.00244 | 0.00276 | 0.00000 | 0.00143 |
| Q80TV8 | CLAP1_MOUSE | 0.00000 | 0.00000 | 0.00000 | 0.00000 | 0.00000 | 0.00000 | 0.00239 | 0.00111 | 0.00393 | 0.00210 | 0.00352 | 0.00364 |
| Q80TY0 | FNBP1_MOUSE | 0.00000 | 0.00000 | 0.00000 | 0.00000 | 0.00000 | 0.00000 | 0.00515 | 0.00631 | 0.00634 | 0.00611 | 0.00484 | 0.00688 |
| Q80U63 | MFN2_MOUSE  | 0.00375 | 0.00346 | 0.00226 | 0.00175 | 0.00170 | 0.00270 | 0.00336 | 0.00042 | 0.00286 | 0.00242 | 0.00196 | 0.00226 |
| Q80U93 | NU214_MOUSE | 0.00000 | 0.00000 | 0.00000 | 0.00000 | 0.00000 | 0.00000 | 0.00524 | 0.00444 | 0.00375 | 0.00360 | 0.00156 | 0.00369 |
| Q80UG5 | SEPT9_MOUSE | 0.00000 | 0.00000 | 0.00000 | 0.00000 | 0.00000 | 0.00000 | 0.01185 | 0.02043 | 0.02500 | 0.01462 | 0.01037 | 0.01277 |
| Q80UJ7 | RB3GP_MOUSE | 0.00000 | 0.00000 | 0.00000 | 0.00000 | 0.00000 | 0.00000 | 0.00000 | 0.00000 | 0.00091 | 0.00051 | 0.00054 | 0.00000 |
| Q80UM7 | MOGS_MOUSE  | 0.00000 | 0.00000 | 0.00000 | 0.00000 | 0.00000 | 0.00000 | 0.00531 | 0.00659 | 0.00527 | 0.00438 | 0.00368 | 0.00641 |
| Q80UP5 | AN13A_MOUSE | 0.00000 | 0.00000 | 0.00000 | 0.00000 | 0.00000 | 0.00000 | 0.00187 | 0.00537 | 0.00763 | 0.00770 | 0.00594 | 0.00448 |
| Q80UU9 | PGRC2_MOUSE | 0.00000 | 0.00000 | 0.00000 | 0.00000 | 0.00000 | 0.00000 | 0.00000 | 0.00528 | 0.01212 | 0.00601 | 0.00436 | 0.00590 |

|        |              |         |         |         |         |         |         |         |         |         |         |         |         |
|--------|--------------|---------|---------|---------|---------|---------|---------|---------|---------|---------|---------|---------|---------|
| Q80UW5 | MRCKG_MOUSE  | 0.00000 | 0.00000 | 0.00000 | 0.00000 | 0.00000 | 0.00000 | 0.00638 | 0.00856 | 0.00711 | 0.00763 | 0.00670 | 0.00888 |
| Q80UW8 | RPAB1_MOUSE  | 0.00000 | 0.00000 | 0.00000 | 0.00000 | 0.00000 | 0.00000 | 0.00000 | 0.00000 | 0.00000 | 0.00000 | 0.00093 | 0.00085 |
| Q80V42 | CBPM_MOUSE   | 0.00000 | 0.00000 | 0.00000 | 0.00000 | 0.00000 | 0.00000 | 0.00744 | 0.00954 | 0.00696 | 0.00697 | 0.00758 | 0.00666 |
| Q80V70 | MEGF6_MOUSE  | 0.00000 | 0.00000 | 0.00000 | 0.00000 | 0.00000 | 0.00000 | 0.00000 | 0.00229 | 0.00493 | 0.00246 | 0.00369 | 0.00100 |
| Q80VD1 | FA98B_MOUSE  | 0.00000 | 0.00000 | 0.00000 | 0.00000 | 0.00000 | 0.00000 | 0.00246 | 0.00283 | 0.00351 | 0.00291 | 0.00137 | 0.00338 |
| Q80VJ2 | SRA1_MOUSE   | 0.00000 | 0.00000 | 0.00000 | 0.00000 | 0.00000 | 0.00000 | 0.00000 | 0.00000 | 0.00050 | 0.00116 | 0.00000 | 0.00000 |
| Q80VJ3 | DNPH1_MOUSE  | 0.00000 | 0.00000 | 0.00000 | 0.00000 | 0.00000 | 0.00000 | 0.00000 | 0.00000 | 0.00000 | 0.00000 | 0.00000 | 0.00330 |
| Q80VP0 | TCPR1_MOUSE  | 0.00000 | 0.00000 | 0.00000 | 0.00000 | 0.00000 | 0.00000 | 0.00318 | 0.00474 | 0.00472 | 0.00330 | 0.00623 | 0.00480 |
| Q80VP1 | EPN1_MOUSE   | 0.00000 | 0.00000 | 0.00000 | 0.00000 | 0.00000 | 0.00000 | 0.00419 | 0.00583 | 0.00787 | 0.00406 | 0.00985 | 0.00626 |
| Q80VQ0 | AL3B1_MOUSE  | 0.00000 | 0.00000 | 0.00000 | 0.00000 | 0.00000 | 0.00000 | 0.00883 | 0.01624 | 0.01738 | 0.02133 | 0.01246 | 0.02084 |
| Q80VQ1 | LRRC1_MOUSE  | 0.00000 | 0.00000 | 0.00000 | 0.00000 | 0.00000 | 0.00000 | 0.00395 | 0.00166 | 0.00508 | 0.00215 | 0.00555 | 0.00539 |
| Q80W04 | TMCC2_MOUSE  | 0.00000 | 0.00000 | 0.00000 | 0.00000 | 0.00000 | 0.00000 | 0.00135 | 0.00393 | 0.00394 | 0.00288 | 0.00504 | 0.00300 |
| Q80W21 | GSTM7_MOUSE  | 0.01304 | 0.01390 | 0.00948 | 0.01966 | 0.01460 | 0.03306 | 0.00236 | 0.00632 | 0.00184 | 0.00481 | 0.00000 | 0.00420 |
| Q80W22 | THNS2_MOUSE  | 0.00000 | 0.00000 | 0.00000 | 0.00000 | 0.00000 | 0.00000 | 0.00045 | 0.00229 | 0.00159 | 0.00088 | 0.00196 | 0.00156 |
| Q80W54 | FACE1_MOUSE  | 0.00384 | 0.00287 | 0.00330 | 0.00328 | 0.00204 | 0.00415 | 0.01583 | 0.01441 | 0.01937 | 0.01549 | 0.01824 | 0.01478 |
| Q80W93 | HYDIN_MOUSE  | 0.00055 | 0.00108 | 0.00088 | 0.00145 | 0.00084 | 0.00111 | 0.00000 | 0.01033 | 0.00609 | 0.01293 | 0.00645 | 0.00611 |
| Q80WB5 | NTAQ1_MOUSE  | 0.00000 | 0.00000 | 0.00000 | 0.00000 | 0.00000 | 0.00000 | 0.00000 | 0.00072 | 0.00516 | 0.00197 | 0.00217 | 0.00177 |
| Q80WC7 | AGFG2_MOUSE  | 0.00000 | 0.00000 | 0.00000 | 0.00000 | 0.00000 | 0.00000 | 0.00081 | 0.00825 | 0.00310 | 0.00218 | 0.00306 | 0.00037 |
| Q80WG5 | LRC8A_MOUSE  | 0.00000 | 0.00000 | 0.00000 | 0.00000 | 0.00000 | 0.00000 | 0.00000 | 0.00000 | 0.00054 | 0.00000 | 0.00039 | 0.00024 |
| Q80WJ7 | LYRIC_MOUSE  | 0.00000 | 0.00000 | 0.00000 | 0.00000 | 0.00000 | 0.00000 | 0.01143 | 0.01229 | 0.00624 | 0.00960 | 0.00782 | 0.00952 |
| Q80WK2 | OSTB_MOUSE   | 0.00000 | 0.00000 | 0.00000 | 0.00000 | 0.00000 | 0.00000 | 0.00000 | 0.00000 | 0.00000 | 0.00000 | 0.00000 | 0.00000 |
| Q80WQ2 | VAC14_MOUSE  | 0.00000 | 0.00000 | 0.00000 | 0.00000 | 0.00000 | 0.00000 | 0.07665 | 0.01173 | 0.02051 | 0.01138 | 0.02377 | 0.01476 |
| Q80WR1 | TSN18_MOUSE  | 0.00000 | 0.00000 | 0.00000 | 0.00000 | 0.00000 | 0.00000 | 0.00203 | 0.00602 | 0.00180 | 0.00272 | 0.00095 | 0.00260 |
| Q80WW9 | DDR GK_MOUSE | 0.00000 | 0.00000 | 0.00000 | 0.00000 | 0.00000 | 0.00000 | 0.00000 | 0.00190 | 0.00472 | 0.00333 | 0.00264 | 0.00511 |
| Q80X19 | COEA1_MOUSE  | 0.00000 | 0.00000 | 0.00000 | 0.00000 | 0.00000 | 0.00000 | 0.00585 | 0.00337 | 0.00874 | 0.00215 | 0.01392 | 0.00864 |
| Q80X41 | VRK1_MOUSE   | 0.00000 | 0.00000 | 0.00000 | 0.00000 | 0.00000 | 0.00000 | 0.00377 | 0.00472 | 0.00436 | 0.00239 | 0.01338 | 0.00419 |
| Q80X50 | UBP2L_MOUSE  | 0.00000 | 0.00000 | 0.00000 | 0.00000 | 0.00000 | 0.00000 | 0.00984 | 0.00857 | 0.00960 | 0.00833 | 0.00869 | 0.00846 |
| Q80X85 | RT07_MOUSE   | 0.00000 | 0.00000 | 0.00000 | 0.00000 | 0.00000 | 0.00000 | 0.00000 | 0.00022 | 0.00000 | 0.00000 | 0.00000 | 0.00000 |
| Q80X90 | FLNB_MOUSE   | 0.03543 | 0.01861 | 0.00983 | 0.01228 | 0.01067 | 0.01677 | 0.03086 | 0.02715 | 0.03235 | 0.02887 | 0.03174 | 0.03075 |
| Q80X95 | RRAGA_MOUSE  | 0.00000 | 0.00000 | 0.00000 | 0.00000 | 0.00000 | 0.00000 | 0.00000 | 0.00308 | 0.00513 | 0.00392 | 0.00207 | 0.00151 |
| Q80XA6 | REPS2_MOUSE  | 0.00000 | 0.00000 | 0.00000 | 0.00000 | 0.00000 | 0.00000 | 0.00000 | 0.00000 | 0.00129 | 0.00000 | 0.00000 | 0.00000 |
| Q80XI4 | PI42B_MOUSE  | 0.00080 | 0.00067 | 0.00077 | 0.00049 | 0.00049 | 0.00066 | 0.00477 | 0.00435 | 0.00746 | 0.00676 | 0.00621 | 0.00750 |
| Q80XL6 | ACD11_MOUSE  | 0.00000 | 0.00000 | 0.00000 | 0.00000 | 0.00000 | 0.00000 | 0.00000 | 0.00000 | 0.00002 | 0.00000 | 0.00000 | 0.00000 |
| Q80XN0 | BDH_MOUSE    | 0.09843 | 0.12299 | 0.14871 | 0.08946 | 0.14379 | 0.08936 | 0.00040 | 0.00099 | 0.00000 | 0.00017 | 0.00009 | 0.00016 |



|        |             |         |         |         |         |         |         |         |         |         |         |         |         |
|--------|-------------|---------|---------|---------|---------|---------|---------|---------|---------|---------|---------|---------|---------|
| Q80XR2 | AT2C1_MOUSE | 0.00000 | 0.00000 | 0.00000 | 0.00000 | 0.00000 | 0.00000 | 0.01668 | 0.07213 | 0.03590 | 0.05605 | 0.00000 | 0.06797 |
| Q80XU3 | NUCKS_MOUSE | 0.00000 | 0.00000 | 0.00000 | 0.00000 | 0.00000 | 0.00000 | 0.00000 | 0.00610 | 0.00614 | 0.00665 | 0.00672 | 0.00661 |
| Q80Y14 | GLRX5_MOUSE | 0.01216 | 0.01296 | 0.00915 | 0.00933 | 0.00721 | 0.01000 | 0.00624 | 0.00452 | 0.00420 | 0.00365 | 0.00210 | 0.00612 |
| Q80YA7 | DPP8_MOUSE  | 0.00000 | 0.00000 | 0.00000 | 0.00000 | 0.00000 | 0.00000 | 0.00659 | 0.01436 | 0.00876 | 0.00506 | 0.00000 | 0.00861 |
| Q80YC5 | FA12_MOUSE  | 0.00000 | 0.00000 | 0.00000 | 0.00000 | 0.00000 | 0.00000 | 0.00499 | 0.00361 | 0.00540 | 0.00589 | 0.00788 | 0.00309 |
| Q80YV4 | PANK4_MOUSE | 0.00342 | 0.00522 | 0.00205 | 0.01497 | 0.00305 | 0.00247 | 0.00000 | 0.00000 | 0.00000 | 0.00000 | 0.00000 | 0.00000 |
| Q80ZJ1 | RAP2A_MOUSE | 0.00000 | 0.00000 | 0.00000 | 0.00000 | 0.00000 | 0.00000 | 0.00000 | 0.01709 | 0.01050 | 0.01211 | 0.01495 | 0.01477 |
| Q810A7 | DDX42_MOUSE | 0.00000 | 0.00000 | 0.00000 | 0.00000 | 0.00000 | 0.00000 | 0.00000 | 0.00000 | 0.00000 | 0.00062 | 0.00171 | 0.00080 |
| Q810B6 | ANFY1_MOUSE | 0.00000 | 0.00000 | 0.00000 | 0.00000 | 0.00000 | 0.00000 | 0.00162 | 0.00370 | 0.00551 | 0.00518 | 0.00632 | 0.00448 |
| Q811D0 | DLG1_MOUSE  | 0.00116 | 0.00096 | 0.00087 | 0.00083 | 0.00094 | 0.00040 | 0.00186 | 0.00487 | 0.00804 | 0.00524 | 0.00768 | 0.00528 |
| Q811I0 | ATPF1_MOUSE | 0.00250 | 0.00329 | 0.00362 | 0.00293 | 0.00218 | 0.00317 | 0.00000 | 0.00020 | 0.00029 | 0.00000 | 0.00032 | 0.00000 |
| Q8BFP9 | PDK1_MOUSE  | 0.01863 | 0.02029 | 0.01459 | 0.01483 | 0.01462 | 0.01105 | 0.00178 | 0.00511 | 0.00090 | 0.00085 | 0.00000 | 0.00292 |
| Q8BFQ4 | WDR82_MOUSE | 0.00000 | 0.00000 | 0.00000 | 0.00000 | 0.00000 | 0.00000 | 0.00807 | 0.01172 | 0.01678 | 0.01047 | 0.01364 | 0.01637 |
| Q8BFQ8 | GALD1_MOUSE | 0.00000 | 0.00000 | 0.00000 | 0.00000 | 0.00000 | 0.00000 | 0.00416 | 0.00247 | 0.00845 | 0.00571 | 0.00838 | 0.00722 |
| Q8BFR4 | GNS_MOUSE   | 0.00000 | 0.00000 | 0.00000 | 0.00000 | 0.00000 | 0.00000 | 0.00000 | 0.00804 | 0.00545 | 0.00239 | 0.00175 | 0.00000 |
| Q8BFR5 | EFTU_MOUSE  | 0.09974 | 0.17577 | 0.08721 | 0.13907 | 0.10424 | 0.22076 | 0.03212 | 0.02891 | 0.02633 | 0.03100 | 0.02845 | 0.03150 |
| Q8BFS6 | CPPED_MOUSE | 0.00859 | 0.00611 | 0.00347 | 0.00318 | 0.00258 | 0.00280 | 0.00000 | 0.00358 | 0.00156 | 0.00195 | 0.00052 | 0.00037 |
| Q8BFW7 | LPP_MOUSE   | 0.00085 | 0.00166 | 0.00143 | 0.00189 | 0.00095 | 0.00228 | 0.04305 | 0.05378 | 0.04869 | 0.04953 | 0.03428 | 0.05503 |
| Q8BFY6 | PEF1_MOUSE  | 0.00082 | 0.00418 | 0.00177 | 0.00211 | 0.00053 | 0.00362 | 0.00353 | 0.00248 | 0.00710 | 0.00421 | 0.00572 | 0.00567 |
| Q8BFY9 | TNPO1_MOUSE | 0.00000 | 0.00000 | 0.00000 | 0.00000 | 0.00000 | 0.00000 | 0.01042 | 0.00796 | 0.00909 | 0.00959 | 0.01106 | 0.01123 |
| Q8BFZ9 | ERLN2_MOUSE | 0.00000 | 0.00000 | 0.00000 | 0.00000 | 0.00000 | 0.00000 | 0.00390 | 0.01332 | 0.01266 | 0.01422 | 0.00788 | 0.01138 |
| Q8BG05 | ROA3_MOUSE  | 0.00886 | 0.00800 | 0.00678 | 0.00991 | 0.00829 | 0.00727 | 0.19558 | 0.14625 | 0.16448 | 0.15643 | 0.17950 | 0.15295 |
| Q8BG07 | PLD4_MOUSE  | 0.00000 | 0.00000 | 0.00000 | 0.00000 | 0.00000 | 0.00000 | 0.00000 | 0.00138 | 0.00385 | 0.00269 | 0.00384 | 0.00252 |
| Q8BG32 | PSD11_MOUSE | 0.00333 | 0.00634 | 0.00561 | 0.00610 | 0.00464 | 0.00463 | 0.01705 | 0.01287 | 0.01951 | 0.01719 | 0.01857 | 0.01718 |
| Q8BG51 | MIRO1_MOUSE | 0.00000 | 0.00000 | 0.00000 | 0.00000 | 0.00000 | 0.00000 | 0.00521 | 0.00705 | 0.00302 | 0.00286 | 0.00351 | 0.00385 |
| Q8BG67 | EFR3A_MOUSE | 0.00000 | 0.00000 | 0.00000 | 0.00000 | 0.00000 | 0.00000 | 0.00000 | 0.00000 | 0.00064 | 0.00051 | 0.00071 | 0.00000 |
| Q8BG81 | PDIP3_MOUSE | 0.00000 | 0.00000 | 0.00000 | 0.00000 | 0.00000 | 0.00000 | 0.00400 | 0.00735 | 0.00224 | 0.00865 | 0.00000 | 0.00710 |
| Q8BG95 | MYPT2_MOUSE | 0.00196 | 0.00100 | 0.00323 | 0.00381 | 0.00378 | 0.00198 | 0.00000 | 0.00523 | 0.00789 | 0.00773 | 0.00532 | 0.00265 |
| Q8BGA8 | ACSM5_MOUSE | 0.00000 | 0.00000 | 0.00000 | 0.00000 | 0.00000 | 0.00000 | 0.00000 | 0.00000 | 0.00000 | 0.00000 | 0.00000 | 0.00000 |
| Q8BGB5 | LIMD2_MOUSE | 0.00000 | 0.00000 | 0.00000 | 0.00000 | 0.00000 | 0.00000 | 0.00416 | 0.00942 | 0.01088 | 0.00736 | 0.01452 | 0.01066 |
| Q8BGB7 | ENOPH_MOUSE | 0.00000 | 0.00000 | 0.00000 | 0.00000 | 0.00000 | 0.00000 | 0.02438 | 0.00835 | 0.03457 | 0.02704 | 0.03807 | 0.02467 |
| Q8BGB8 | COQ4_MOUSE  | 0.00000 | 0.00000 | 0.00000 | 0.00000 | 0.00000 | 0.00000 | 0.00000 | 0.00000 | 0.00000 | 0.00000 | 0.00000 | 0.00000 |
| Q8BGC0 | HTSF1_MOUSE | 0.00000 | 0.00000 | 0.00000 | 0.00000 | 0.00000 | 0.00000 | 0.00000 | 0.00395 | 0.00643 | 0.00251 | 0.00891 | 0.00700 |
| Q8BGC4 | PTGR3_MOUSE | 0.01973 | 0.02398 | 0.01377 | 0.01554 | 0.01612 | 0.02751 | 0.01038 | 0.01023 | 0.01149 | 0.00973 | 0.00911 | 0.01096 |



|        |             |         |         |         |         |         |         |         |         |         |         |         |         |
|--------|-------------|---------|---------|---------|---------|---------|---------|---------|---------|---------|---------|---------|---------|
| Q8BGD9 | IF4B_MOUSE  | 0.00000 | 0.00000 | 0.00000 | 0.00000 | 0.00000 | 0.00000 | 0.01905 | 0.02389 | 0.02969 | 0.02914 | 0.03102 | 0.02768 |
| Q8BGH2 | SAM50_MOUSE | 0.06798 | 0.06659 | 0.06807 | 0.06300 | 0.07432 | 0.06920 | 0.01447 | 0.01210 | 0.01366 | 0.01101 | 0.01229 | 0.01289 |
| Q8BGH7 | C42S2_MOUSE | 0.00000 | 0.00000 | 0.00000 | 0.00000 | 0.00000 | 0.00000 | 0.00809 | 0.01020 | 0.01171 | 0.00855 | 0.01477 | 0.00706 |
| Q8BGQ1 | SPE39_MOUSE | 0.00000 | 0.00000 | 0.00000 | 0.00000 | 0.00000 | 0.00000 | 0.00123 | 0.00055 | 0.00142 | 0.00065 | 0.00130 | 0.00074 |
| Q8BGQ7 | SYAC_MOUSE  | 0.00415 | 0.01281 | 0.00270 | 0.00427 | 0.00307 | 0.00316 | 0.00061 | 0.00591 | 0.00738 | 0.00691 | 0.00806 | 0.00956 |
| Q8BGR6 | ARL15_MOUSE | 0.00000 | 0.00000 | 0.00000 | 0.00000 | 0.00000 | 0.00000 | 0.00345 | 0.00070 | 0.00550 | 0.00125 | 0.00519 | 0.00167 |
| Q8BGR9 | UBCP1_MOUSE | 0.00000 | 0.00000 | 0.00000 | 0.00000 | 0.00000 | 0.00000 | 0.00275 | 0.00073 | 0.00036 | 0.00173 | 0.00138 | 0.00055 |
| Q8BGS1 | E41L5_MOUSE | 0.00000 | 0.00000 | 0.00000 | 0.00000 | 0.00000 | 0.00000 | 0.02921 | 0.03174 | 0.03501 | 0.02966 | 0.03698 | 0.03412 |
| Q8BGS7 | CEPT1_MOUSE | 0.00000 | 0.00000 | 0.00000 | 0.00000 | 0.00000 | 0.00000 | 0.00178 | 0.00462 | 0.00363 | 0.00248 | 0.00306 | 0.00656 |
| Q8BGU5 | CCNY_MOUSE  | 0.00000 | 0.00000 | 0.00000 | 0.00000 | 0.00000 | 0.00000 | 0.00136 | 0.00326 | 0.00539 | 0.00210 | 0.00537 | 0.00295 |
| Q8BGX0 | TRI23_MOUSE | 0.00000 | 0.00000 | 0.00000 | 0.00000 | 0.00000 | 0.00000 | 0.00222 | 0.01840 | 0.00360 | 0.01344 | 0.01068 | 0.01309 |
| Q8BGX2 | TIM29_MOUSE | 0.00000 | 0.00000 | 0.00000 | 0.00000 | 0.00000 | 0.00000 | 0.02159 | 0.00446 | 0.00000 | 0.00000 | 0.00000 | 0.00000 |
| Q8BH00 | AL8A1_MOUSE | 0.00000 | 0.00000 | 0.00000 | 0.00000 | 0.00000 | 0.00000 | 0.00025 | 0.00032 | 0.00003 | 0.00027 | 0.00027 | 0.00011 |
| Q8BH04 | PCKGM_MOUSE | 0.00000 | 0.00000 | 0.00000 | 0.00000 | 0.00000 | 0.00000 | 0.01035 | 0.01090 | 0.01398 | 0.01202 | 0.01401 | 0.01512 |
| Q8BH24 | TM9S4_MOUSE | 0.00000 | 0.00000 | 0.00000 | 0.00000 | 0.00000 | 0.00000 | 0.00043 | 0.00171 | 0.00340 | 0.00402 | 0.00577 | 0.00316 |
| Q8BH35 | CO8B_MOUSE  | 0.00000 | 0.00000 | 0.00000 | 0.00000 | 0.00000 | 0.00000 | 0.00038 | 0.00066 | 0.00151 | 0.00000 | 0.00000 | 0.00000 |
| Q8BH43 | WASF2_MOUSE | 0.00000 | 0.00000 | 0.00000 | 0.00000 | 0.00000 | 0.00000 | 0.06069 | 0.04104 | 0.00885 | 0.02074 | 0.01137 | 0.02431 |
| Q8BH44 | COR2B_MOUSE | 0.00000 | 0.00000 | 0.00000 | 0.00000 | 0.00000 | 0.00000 | 0.00155 | 0.00124 | 0.00274 | 0.00156 | 0.00328 | 0.00209 |
| Q8BH58 | TIPRL_MOUSE | 0.00316 | 0.00315 | 0.00373 | 0.00225 | 0.00431 | 0.00190 | 0.00216 | 0.00349 | 0.00658 | 0.00495 | 0.00589 | 0.00438 |
| Q8BH59 | CMC1_MOUSE  | 0.17879 | 0.15432 | 0.25799 | 0.19707 | 0.15313 | 0.13865 | 0.02798 | 0.01919 | 0.01282 | 0.01924 | 0.01523 | 0.01540 |
| Q8BH61 | F13A_MOUSE  | 0.00706 | 0.00686 | 0.00746 | 0.00780 | 0.00797 | 0.00778 | 0.01900 | 0.01363 | 0.01441 | 0.01522 | 0.01209 | 0.01636 |
| Q8BH64 | EHD2_MOUSE  | 0.10386 | 0.09238 | 0.10606 | 0.10042 | 0.11179 | 0.09134 | 0.21441 | 0.32130 | 0.34561 | 0.28896 | 0.34083 | 0.33428 |
| Q8BH69 | SPS1_MOUSE  | 0.00000 | 0.00000 | 0.00000 | 0.00000 | 0.00000 | 0.00000 | 0.00182 | 0.01454 | 0.00355 | 0.00471 | 0.00328 | 0.00696 |
| Q8BH74 | NU107_MOUSE | 0.00000 | 0.00000 | 0.00000 | 0.00000 | 0.00000 | 0.00000 | 0.00000 | 0.00166 | 0.00318 | 0.00239 | 0.00099 | 0.00156 |
| Q8BH79 | ANO10_MOUSE | 0.00000 | 0.00000 | 0.00000 | 0.00000 | 0.00000 | 0.00000 | 0.00316 | 0.00368 | 0.00415 | 0.00260 | 0.00225 | 0.00290 |
| Q8BH86 | GLUCM_MOUSE | 0.03497 | 0.02444 | 0.02866 | 0.03399 | 0.02822 | 0.04529 | 0.00117 | 0.00139 | 0.00257 | 0.00211 | 0.00217 | 0.00166 |
| Q8BH95 | ECHM_MOUSE  | 0.08583 | 0.04425 | 0.06741 | 0.07146 | 0.06865 | 0.05734 | 0.07368 | 0.07478 | 0.07915 | 0.05873 | 0.05984 | 0.06446 |
| Q8BH97 | RCN3_MOUSE  | 0.00000 | 0.00000 | 0.00000 | 0.00000 | 0.00000 | 0.00000 | 0.01214 | 0.00802 | 0.01584 | 0.01122 | 0.01256 | 0.01075 |
| Q8BHA3 | DTD2_MOUSE  | 0.00000 | 0.00000 | 0.00000 | 0.00000 | 0.00000 | 0.00000 | 0.00000 | 0.00132 | 0.00200 | 0.00174 | 0.00090 | 0.00051 |
| Q8BHC0 | LYVE1_MOUSE | 0.00000 | 0.00000 | 0.00000 | 0.00000 | 0.00000 | 0.00000 | 0.00000 | 0.01549 | 0.00468 | 0.00658 | 0.00000 | 0.00952 |
| Q8BHC7 | RHBL4_MOUSE | 0.00000 | 0.00000 | 0.00000 | 0.00000 | 0.00000 | 0.00000 | 0.00075 | 0.00229 | 0.00000 | 0.00091 | 0.00088 | 0.00122 |
| Q8BHD7 | PTBP3_MOUSE | 0.00000 | 0.00000 | 0.00000 | 0.00000 | 0.00000 | 0.00000 | 0.00758 | 0.00380 | 0.01803 | 0.01481 | 0.01798 | 0.02067 |
| Q8BHF7 | PGPS1_MOUSE | 0.00000 | 0.00000 | 0.00000 | 0.00000 | 0.00000 | 0.00000 | 0.00212 | 0.00390 | 0.00518 | 0.00239 | 0.00191 | 0.00206 |
| Q8BHG1 | NRDC_MOUSE  | 0.00000 | 0.00000 | 0.00000 | 0.00000 | 0.00000 | 0.00000 | 0.00480 | 0.00214 | 0.00420 | 0.00309 | 0.00449 | 0.00443 |

|        |             |         |         |         |         |         |         |         |         |         |         |         |         |
|--------|-------------|---------|---------|---------|---------|---------|---------|---------|---------|---------|---------|---------|---------|
| Q8BHG2 | CZIB_MOUSE  | 0.00000 | 0.00000 | 0.00000 | 0.00000 | 0.00000 | 0.00000 | 0.00392 | 0.00395 | 0.00580 | 0.00412 | 0.00516 | 0.00462 |
| Q8BHI7 | ELOV5_MOUSE | 0.00000 | 0.00000 | 0.00000 | 0.00000 | 0.00000 | 0.00000 | 0.00842 | 0.00805 | 0.00600 | 0.00508 | 0.00439 | 0.00448 |
| Q8BHJ5 | TBL1R_MOUSE | 0.00000 | 0.00000 | 0.00000 | 0.00000 | 0.00000 | 0.00000 | 0.00000 | 0.00055 | 0.00000 | 0.00020 | 0.00000 | 0.00043 |
| Q8BHL4 | RAI3_MOUSE  | 0.00000 | 0.00000 | 0.00000 | 0.00000 | 0.00000 | 0.00000 | 0.23638 | 0.22855 | 0.19219 | 0.17165 | 0.10268 | 0.17327 |
| Q8BHL5 | ELMO2_MOUSE | 0.00000 | 0.00000 | 0.00000 | 0.00000 | 0.00000 | 0.00000 | 0.00086 | 0.00274 | 0.00653 | 0.00600 | 0.00287 | 0.00439 |
| Q8BHL8 | PSMF1_MOUSE | 0.00000 | 0.00000 | 0.00000 | 0.00000 | 0.00000 | 0.00000 | 0.00000 | 0.00000 | 0.00165 | 0.00397 | 0.00356 | 0.00246 |
| Q8BHN0 | PPM1L_MOUSE | 0.00000 | 0.00000 | 0.00000 | 0.00000 | 0.00000 | 0.00000 | 0.00000 | 0.00000 | 0.00127 | 0.00000 | 0.00125 | 0.00190 |
| Q8BHN3 | GANAB_MOUSE | 0.00130 | 0.00158 | 0.00155 | 0.00252 | 0.00123 | 0.00158 | 0.02682 | 0.02919 | 0.02905 | 0.02836 | 0.02771 | 0.02537 |
| Q8BHZ0 | CYRIA_MOUSE | 0.00000 | 0.00000 | 0.00000 | 0.00000 | 0.00000 | 0.00000 | 0.01067 | 0.01647 | 0.01276 | 0.01150 | 0.01320 | 0.01806 |
| Q8BI08 | MAL2_MOUSE  | 0.00000 | 0.00000 | 0.00000 | 0.00000 | 0.00000 | 0.00000 | 0.00184 | 0.01748 | 0.00578 | 0.00422 | 0.00302 | 0.01721 |
| Q8BI29 | SARG_MOUSE  | 0.00000 | 0.00000 | 0.00000 | 0.00000 | 0.00000 | 0.00000 | 0.01074 | 0.01434 | 0.01835 | 0.01295 | 0.02121 | 0.02076 |
| Q8BIJ6 | SYIM_MOUSE  | 0.05969 | 0.04481 | 0.06914 | 0.05600 | 0.06245 | 0.05474 | 0.03125 | 0.02937 | 0.03867 | 0.02969 | 0.03533 | 0.03638 |
| Q8BIJ7 | RUFY1_MOUSE | 0.00000 | 0.00000 | 0.00000 | 0.00000 | 0.00000 | 0.00000 | 0.00000 | 0.00209 | 0.00484 | 0.00577 | 0.00117 | 0.00324 |
| Q8BIK4 | DOCK9_MOUSE | 0.00000 | 0.00000 | 0.00000 | 0.00000 | 0.00000 | 0.00000 | 0.00849 | 0.00590 | 0.00836 | 0.00468 | 0.00708 | 0.00709 |
| Q8BIW1 | PRUN1_MOUSE | 0.00000 | 0.00000 | 0.00000 | 0.00000 | 0.00000 | 0.00000 | 0.00079 | 0.00000 | 0.00033 | 0.00000 | 0.00000 | 0.00054 |
| Q8BJ03 | COX15_MOUSE | 0.00000 | 0.00000 | 0.00000 | 0.00000 | 0.00000 | 0.00000 | 0.00000 | 0.00000 | 0.00000 | 0.00000 | 0.00000 | 0.00000 |
| Q8BJ64 | CHDH_MOUSE  | 0.00000 | 0.00000 | 0.00000 | 0.00000 | 0.00000 | 0.00000 | 0.00301 | 0.00157 | 0.00192 | 0.00225 | 0.00000 | 0.00338 |
| Q8BJ71 | NUP93_MOUSE | 0.00000 | 0.00000 | 0.00000 | 0.00000 | 0.00000 | 0.00000 | 0.00102 | 0.00218 | 0.00478 | 0.00395 | 0.00754 | 0.00648 |
| Q8BJS4 | SUN2_MOUSE  | 0.00271 | 0.00200 | 0.00131 | 0.00186 | 0.00253 | 0.00237 | 0.01032 | 0.01020 | 0.01461 | 0.01125 | 0.01303 | 0.01437 |
| Q8BJU0 | SGTA_MOUSE  | 0.00093 | 0.00080 | 0.00111 | 0.00081 | 0.00081 | 0.00067 | 0.00282 | 0.00538 | 0.00712 | 0.00583 | 0.00392 | 0.00494 |
| Q8BJU2 | TSN9_MOUSE  | 0.00000 | 0.00000 | 0.00000 | 0.00000 | 0.00000 | 0.00000 | 0.01348 | 0.01514 | 0.01131 | 0.01072 | 0.00827 | 0.01655 |
| Q8BJW6 | EIF2A_MOUSE | 0.00000 | 0.00000 | 0.00000 | 0.00000 | 0.00000 | 0.00000 | 0.00302 | 0.00100 | 0.00258 | 0.00185 | 0.00095 | 0.00259 |
| Q8BJY1 | PSMD5_MOUSE | 0.00690 | 0.00943 | 0.00641 | 0.00286 | 0.00590 | 0.00783 | 0.01395 | 0.01272 | 0.02024 | 0.01757 | 0.02234 | 0.01771 |
| Q8BJZ3 | LFG3_MOUSE  | 0.00000 | 0.00000 | 0.00000 | 0.00000 | 0.00000 | 0.00000 | 0.00000 | 0.00374 | 0.00220 | 0.00300 | 0.00261 | 0.00171 |
| Q8BK62 | OLFL3_MOUSE | 0.00000 | 0.00000 | 0.00000 | 0.00000 | 0.00000 | 0.00000 | 0.00179 | 0.00298 | 0.00236 | 0.00219 | 0.00109 | 0.00244 |
| Q8BK63 | KC1A_MOUSE  | 0.00000 | 0.00000 | 0.00000 | 0.00000 | 0.00000 | 0.00000 | 0.00289 | 0.00036 | 0.00207 | 0.00133 | 0.00111 | 0.00000 |
| Q8BK64 | AHSA1_MOUSE | 0.00000 | 0.00000 | 0.00000 | 0.00000 | 0.00000 | 0.00000 | 0.00994 | 0.01110 | 0.01206 | 0.00813 | 0.01472 | 0.00983 |
| Q8BK67 | RCC2_MOUSE  | 0.00000 | 0.00000 | 0.00000 | 0.00000 | 0.00000 | 0.00000 | 0.00327 | 0.00269 | 0.00484 | 0.00400 | 0.00619 | 0.00520 |
| Q8BK72 | RT27_MOUSE  | 0.00353 | 0.00434 | 0.00453 | 0.00371 | 0.00386 | 0.00261 | 0.00010 | 0.00000 | 0.00023 | 0.00013 | 0.00053 | 0.00036 |
| Q8BKC5 | IPO5_MOUSE  | 0.03337 | 0.02494 | 0.01416 | 0.02448 | 0.01244 | 0.01178 | 0.02602 | 0.02259 | 0.02252 | 0.02693 | 0.02322 | 0.02911 |
| Q8BKE6 | CP20A_MOUSE | 0.00000 | 0.00000 | 0.00000 | 0.00000 | 0.00000 | 0.00000 | 0.00000 | 0.00285 | 0.00686 | 0.00311 | 0.00511 | 0.00184 |
| Q8BKG3 | PTK7_MOUSE  | 0.00000 | 0.00000 | 0.00000 | 0.00000 | 0.00000 | 0.00000 | 0.00448 | 0.01091 | 0.00934 | 0.00907 | 0.00724 | 0.01048 |
| Q8BKX1 | BAIP2_MOUSE | 0.00000 | 0.00000 | 0.00000 | 0.00000 | 0.00000 | 0.00000 | 0.00029 | 0.00081 | 0.00189 | 0.00079 | 0.00147 | 0.00231 |
| Q8BKZ9 | ODPX_MOUSE  | 0.07508 | 0.04029 | 0.06371 | 0.06862 | 0.08331 | 0.05521 | 0.00739 | 0.00914 | 0.01846 | 0.00525 | 0.00418 | 0.00766 |

|        |             |         |         |         |         |         |         |         |         |         |         |         |         |
|--------|-------------|---------|---------|---------|---------|---------|---------|---------|---------|---------|---------|---------|---------|
| Q8BL66 | EEA1_MOUSE  | 0.00868 | 0.02154 | 0.00581 | 0.01351 | 0.00412 | 0.00646 | 0.01055 | 0.00759 | 0.01237 | 0.00826 | 0.00904 | 0.00915 |
| Q8BL97 | SRSF7_MOUSE | 0.00000 | 0.00000 | 0.00000 | 0.00000 | 0.00000 | 0.00000 | 0.10085 | 0.09318 | 0.08187 | 0.07777 | 0.09594 | 0.09546 |
| Q8BLF1 | NCEH1_MOUSE | 0.00265 | 0.00867 | 0.00696 | 0.00689 | 0.00426 | 0.00857 | 0.01034 | 0.01544 | 0.01196 | 0.01067 | 0.01204 | 0.01052 |
| Q8BMA6 | SRP68_MOUSE | 0.00000 | 0.00000 | 0.00000 | 0.00000 | 0.00000 | 0.00000 | 0.00609 | 0.00423 | 0.00654 | 0.00447 | 0.00917 | 0.00684 |
| Q8BMB3 | IF4E2_MOUSE | 0.00000 | 0.00000 | 0.00000 | 0.00000 | 0.00000 | 0.00000 | 0.00000 | 0.00255 | 0.00296 | 0.00232 | 0.00000 | 0.00240 |
| Q8BMC1 | VATG3_MOUSE | 0.00000 | 0.00000 | 0.00000 | 0.00000 | 0.00000 | 0.00000 | 0.00000 | 0.00000 | 0.00000 | 0.00000 | 0.00000 | 0.00000 |
| Q8BMD8 | SCMC1_MOUSE | 0.00000 | 0.00000 | 0.00000 | 0.00000 | 0.00000 | 0.00000 | 0.00101 | 0.00673 | 0.00480 | 0.00425 | 0.00518 | 0.00341 |
| Q8BMF3 | MAON_MOUSE  | 0.00958 | 0.00649 | 0.01996 | 0.01060 | 0.01199 | 0.00555 | 0.00000 | 0.00000 | 0.00000 | 0.00000 | 0.00000 | 0.00000 |
| Q8BMF4 | ODP2_MOUSE  | 0.65553 | 0.40225 | 0.67679 | 0.49929 | 0.59765 | 0.40969 | 0.05715 | 0.03560 | 0.04424 | 0.03529 | 0.04761 | 0.05039 |
| Q8BMG7 | RBGPR_MOUSE | 0.00000 | 0.00000 | 0.00000 | 0.00000 | 0.00000 | 0.00000 | 0.00000 | 0.00028 | 0.00000 | 0.00000 | 0.00079 | 0.00000 |
| Q8BMJ2 | SYLC_MOUSE  | 0.02119 | 0.01410 | 0.00659 | 0.00828 | 0.00869 | 0.00889 | 0.00980 | 0.00912 | 0.00536 | 0.00830 | 0.01102 | 0.01001 |
| Q8BMK4 | CKAP4_MOUSE | 0.00264 | 0.00190 | 0.00326 | 0.00190 | 0.00097 | 0.00416 | 0.01227 | 0.01557 | 0.01888 | 0.01850 | 0.01393 | 0.01795 |
| Q8BML9 | SYQ_MOUSE   | 0.00315 | 0.00229 | 0.00372 | 0.00460 | 0.00343 | 0.00284 | 0.01150 | 0.01048 | 0.01205 | 0.01260 | 0.00953 | 0.01411 |
| Q8BMP6 | GCP60_MOUSE | 0.00000 | 0.00000 | 0.00000 | 0.00000 | 0.00000 | 0.00000 | 0.00391 | 0.00594 | 0.00996 | 0.00824 | 0.00686 | 0.00399 |
| Q8BMS1 | ECHA_MOUSE  | 1.76867 | 2.87358 | 2.11595 | 1.91218 | 1.93977 | 1.72322 | 0.07854 | 0.04605 | 0.06494 | 0.05839 | 0.06489 | 0.05926 |
| Q8BMS4 | COQ3_MOUSE  | 0.02883 | 0.01662 | 0.01391 | 0.01818 | 0.01635 | 0.01995 | 0.00000 | 0.00000 | 0.00015 | 0.00000 | 0.00000 | 0.00000 |
| Q8BMS9 | RASF2_MOUSE | 0.00000 | 0.00000 | 0.00000 | 0.00000 | 0.00000 | 0.00000 | 0.00054 | 0.00137 | 0.00232 | 0.00220 | 0.00122 | 0.00307 |
| Q8BND5 | QSOX1_MOUSE | 0.00208 | 0.00235 | 0.00229 | 0.00466 | 0.00277 | 0.00252 | 0.00582 | 0.00310 | 0.00432 | 0.00743 | 0.00620 | 0.00337 |
| Q8BNI4 | DERL2_MOUSE | 0.00000 | 0.00000 | 0.00000 | 0.00000 | 0.00000 | 0.00000 | 0.00212 | 0.00000 | 0.00097 | 0.00123 | 0.00000 | 0.00090 |
| Q8BP40 | PPA6_MOUSE  | 0.00000 | 0.00000 | 0.00000 | 0.00000 | 0.00000 | 0.00000 | 0.00047 | 0.00092 | 0.00148 | 0.00046 | 0.00148 | 0.00049 |
| Q8BP47 | SYNC_MOUSE  | 0.00469 | 0.00349 | 0.00391 | 0.00337 | 0.00333 | 0.00343 | 0.01671 | 0.02415 | 0.01722 | 0.01978 | 0.01712 | 0.01879 |
| Q8BP67 | RL24_MOUSE  | 0.00000 | 0.00000 | 0.00000 | 0.00000 | 0.00000 | 0.00000 | 0.02608 | 0.03306 | 0.02370 | 0.02662 | 0.01835 | 0.01898 |
| Q8BP71 | RFOX2_MOUSE | 0.00000 | 0.00000 | 0.00000 | 0.00000 | 0.00000 | 0.00000 | 0.00000 | 0.00000 | 0.00050 | 0.00000 | 0.00000 | 0.00086 |
| Q8BP92 | RCN2_MOUSE  | 0.00071 | 0.00048 | 0.00130 | 0.00049 | 0.00135 | 0.00074 | 0.04175 | 0.03533 | 0.03895 | 0.03543 | 0.04876 | 0.04542 |
| Q8BPB5 | FBLN3_MOUSE | 0.00000 | 0.00000 | 0.00000 | 0.00000 | 0.00000 | 0.00000 | 0.01159 | 0.01261 | 0.01673 | 0.01442 | 0.01919 | 0.01306 |
| Q8BPM0 | DAAM1_MOUSE | 0.00000 | 0.00000 | 0.00000 | 0.00000 | 0.00000 | 0.00000 | 0.00327 | 0.00191 | 0.00327 | 0.00287 | 0.00127 | 0.00433 |
| Q8BPU7 | ELMO1_MOUSE | 0.00000 | 0.00000 | 0.00000 | 0.00000 | 0.00000 | 0.00000 | 0.00412 | 0.00546 | 0.00926 | 0.00754 | 0.00916 | 0.01002 |
| Q8BQ47 | CNPY4_MOUSE | 0.00000 | 0.00000 | 0.00000 | 0.00000 | 0.00000 | 0.00000 | 0.00160 | 0.00625 | 0.00872 | 0.00718 | 0.00544 | 0.00884 |
| Q8BQZ4 | RLGPB_MOUSE | 0.00000 | 0.00000 | 0.00000 | 0.00000 | 0.00000 | 0.00000 | 0.00000 | 0.00000 | 0.00087 | 0.00000 | 0.00000 | 0.00016 |
| Q8BR07 | BICD1_MOUSE | 0.00000 | 0.00000 | 0.00000 | 0.00000 | 0.00000 | 0.00000 | 0.01185 | 0.00549 | 0.00719 | 0.00851 | 0.00970 | 0.00785 |
| Q8BR63 | F177A_MOUSE | 0.00000 | 0.00000 | 0.00000 | 0.00000 | 0.00000 | 0.00000 | 0.00122 | 0.00387 | 0.00279 | 0.00197 | 0.00141 | 0.00331 |
| Q8BR90 | CE051_MOUSE | 0.00000 | 0.00000 | 0.00000 | 0.00000 | 0.00000 | 0.00000 | 0.00000 | 0.00000 | 0.00134 | 0.00000 | 0.00383 | 0.00000 |
| Q8BR92 | PALM2_MOUSE | 0.00000 | 0.00000 | 0.00000 | 0.00000 | 0.00000 | 0.00000 | 0.00481 | 0.00700 | 0.00660 | 0.00751 | 0.00480 | 0.01196 |
| Q8BRF7 | SCFD1_MOUSE | 0.00000 | 0.00000 | 0.00000 | 0.00000 | 0.00000 | 0.00000 | 0.00599 | 0.01668 | 0.01906 | 0.01017 | 0.00950 | 0.00976 |

|        |             |         |         |         |         |         |         |         |         |         |         |         |         |
|--------|-------------|---------|---------|---------|---------|---------|---------|---------|---------|---------|---------|---------|---------|
| Q8BRN9 | C2D1B_MOUSE | 0.00000 | 0.00000 | 0.00000 | 0.00000 | 0.00000 | 0.00000 | 0.00047 | 0.00196 | 0.00234 | 0.00154 | 0.00326 | 0.00118 |
| Q8BSE0 | RMD2_MOUSE  | 0.00000 | 0.00000 | 0.00000 | 0.00000 | 0.00000 | 0.00000 | 0.01174 | 0.00565 | 0.00779 | 0.00630 | 0.01387 | 0.00671 |
| Q8BSL7 | ARF2_MOUSE  | 0.00000 | 0.00000 | 0.00000 | 0.00000 | 0.00000 | 0.00000 | 0.00000 | 0.00874 | 0.00045 | 0.00113 | 0.00000 | 0.00168 |
| Q8BSY0 | ASPH_MOUSE  | 0.05638 | 0.05474 | 0.04262 | 0.03744 | 0.03791 | 0.04977 | 0.03055 | 0.02704 | 0.02413 | 0.02493 | 0.01916 | 0.02574 |
| Q8BT60 | CPNE3_MOUSE | 0.00000 | 0.00000 | 0.00000 | 0.00000 | 0.00000 | 0.00000 | 0.00411 | 0.02518 | 0.01172 | 0.01235 | 0.01311 | 0.01809 |
| Q8BTI8 | SRRM2_MOUSE | 0.00000 | 0.00000 | 0.00000 | 0.00000 | 0.00000 | 0.00000 | 0.00210 | 0.00261 | 0.00875 | 0.00623 | 0.00579 | 0.00465 |
| Q8BTJ4 | ENPP4_MOUSE | 0.00000 | 0.00000 | 0.00000 | 0.00000 | 0.00000 | 0.00000 | 0.00000 | 0.00880 | 0.01234 | 0.00984 | 0.01051 | 0.01131 |
| Q8BTM8 | FLNA_MOUSE  | 0.04168 | 0.04013 | 0.03094 | 0.03521 | 0.03224 | 0.04231 | 0.20257 | 0.19194 | 0.20313 | 0.21575 | 0.19692 | 0.19785 |
| Q8BTS4 | NUP54_MOUSE | 0.00000 | 0.00000 | 0.00000 | 0.00000 | 0.00000 | 0.00000 | 0.00198 | 0.00409 | 0.00310 | 0.00289 | 0.00000 | 0.00425 |
| Q8BTU1 | CFA20_MOUSE | 0.00000 | 0.00000 | 0.00000 | 0.00000 | 0.00000 | 0.00000 | 0.00000 | 0.00625 | 0.00193 | 0.00437 | 0.00185 | 0.00313 |
| Q8BTV2 | CPSF7_MOUSE | 0.00000 | 0.00000 | 0.00000 | 0.00000 | 0.00000 | 0.00000 | 0.00000 | 0.00129 | 0.00130 | 0.00241 | 0.00116 | 0.00102 |
| Q8BTY1 | KAT1_MOUSE  | 0.00569 | 0.00502 | 0.00748 | 0.00384 | 0.00633 | 0.00388 | 0.00313 | 0.00031 | 0.00000 | 0.00000 | 0.00000 | 0.00015 |
| Q8BTZ7 | GMPPB_MOUSE | 0.00000 | 0.00000 | 0.00000 | 0.00000 | 0.00000 | 0.00000 | 0.00926 | 0.00662 | 0.00783 | 0.00760 | 0.00755 | 0.00908 |
| Q8BU14 | SEC62_MOUSE | 0.00000 | 0.00000 | 0.00000 | 0.00000 | 0.00000 | 0.00000 | 0.00000 | 0.00157 | 0.00317 | 0.00248 | 0.00109 | 0.00110 |
| Q8BU30 | SYIC_MOUSE  | 0.00068 | 0.00075 | 0.00130 | 0.00085 | 0.00086 | 0.00109 | 0.00656 | 0.00665 | 0.00644 | 0.00753 | 0.00564 | 0.00500 |
| Q8BU31 | RAP2C_MOUSE | 0.00000 | 0.00000 | 0.00000 | 0.00000 | 0.00000 | 0.00000 | 0.00456 | 0.00464 | 0.00534 | 0.00526 | 0.00771 | 0.00331 |
| Q8BU33 | HACL2_MOUSE | 0.00000 | 0.00000 | 0.00000 | 0.00000 | 0.00000 | 0.00000 | 0.00000 | 0.00228 | 0.00096 | 0.00051 | 0.00093 | 0.00090 |
| Q8BUK6 | HOOK3_MOUSE | 0.00449 | 0.00341 | 0.00215 | 0.00119 | 0.00272 | 0.00168 | 0.10706 | 0.30031 | 0.26152 | 0.12586 | 0.15795 | 0.28959 |
| Q8BUR4 | DOCK1_MOUSE | 0.00000 | 0.00000 | 0.00000 | 0.00000 | 0.00000 | 0.00000 | 0.00057 | 0.00229 | 0.00444 | 0.00332 | 0.00428 | 0.00257 |
| Q8BUV3 | GEPH_MOUSE  | 0.00000 | 0.00000 | 0.00000 | 0.00000 | 0.00000 | 0.00000 | 0.00720 | 0.00548 | 0.00389 | 0.00480 | 0.00348 | 0.00673 |
| Q8BV49 | IFIX_MOUSE  | 0.00000 | 0.00000 | 0.00000 | 0.00000 | 0.00000 | 0.00000 | 0.00140 | 0.00172 | 0.00308 | 0.00277 | 0.00299 | 0.00336 |
| Q8BVA4 | LMOD1_MOUSE | 0.00000 | 0.00000 | 0.00000 | 0.00000 | 0.00000 | 0.00000 | 0.00563 | 0.00403 | 0.00384 | 0.00192 | 0.00325 | 0.00000 |
| Q8BVE3 | VATH_MOUSE  | 0.00000 | 0.00000 | 0.00000 | 0.00000 | 0.00000 | 0.00000 | 0.02281 | 0.02188 | 0.03328 | 0.02809 | 0.03592 | 0.02575 |
| Q8BVI4 | DHPR_MOUSE  | 0.03113 | 0.01954 | 0.02477 | 0.01670 | 0.01962 | 0.02090 | 0.02719 | 0.03938 | 0.02517 | 0.02786 | 0.04594 | 0.03443 |
| Q8BVL3 | SNX17_MOUSE | 0.00000 | 0.00000 | 0.00000 | 0.00000 | 0.00000 | 0.00000 | 0.00177 | 0.00099 | 0.00410 | 0.00350 | 0.00715 | 0.00333 |
| Q8BVQ5 | PPME1_MOUSE | 0.00000 | 0.00000 | 0.00000 | 0.00000 | 0.00000 | 0.00000 | 0.00000 | 0.00444 | 0.00300 | 0.00122 | 0.00000 | 0.00246 |
| Q8BVY0 | RL1D1_MOUSE | 0.00000 | 0.00000 | 0.00000 | 0.00000 | 0.00000 | 0.00000 | 0.00264 | 0.00310 | 0.00464 | 0.00412 | 0.00209 | 0.00309 |
| Q8BW75 | AOFB_MOUSE  | 0.05567 | 0.04306 | 0.04260 | 0.05276 | 0.06101 | 0.04571 | 0.05545 | 0.04997 | 0.07321 | 0.06545 | 0.07549 | 0.06591 |
| Q8BWF0 | SSDH_MOUSE  | 0.04212 | 0.04760 | 0.05319 | 0.02485 | 0.04355 | 0.04219 | 0.10112 | 0.09086 | 0.05460 | 0.05895 | 0.04748 | 0.07973 |
| Q8BWG8 | ARRB1_MOUSE | 0.00000 | 0.00000 | 0.00000 | 0.00000 | 0.00000 | 0.00000 | 0.01843 | 0.01976 | 0.02481 | 0.02027 | 0.02286 | 0.02419 |
| Q8BWM0 | PGES2_MOUSE | 0.00617 | 0.00650 | 0.00683 | 0.00430 | 0.00712 | 0.00761 | 0.00260 | 0.00059 | 0.00279 | 0.00162 | 0.00367 | 0.00136 |
| Q8BWN8 | ACOT4_MOUSE | 0.00000 | 0.00000 | 0.00000 | 0.00000 | 0.00000 | 0.00000 | 0.00000 | 0.00000 | 0.00000 | 0.00000 | 0.00000 | 0.00000 |
| Q8BWQ6 | VP35L_MOUSE | 0.00000 | 0.00000 | 0.00000 | 0.00000 | 0.00000 | 0.00000 | 0.00121 | 0.00067 | 0.00199 | 0.00070 | 0.00124 | 0.00067 |
| Q8BWT1 | THIM_MOUSE  | 0.78669 | 0.82259 | 0.64085 | 0.65165 | 0.75044 | 1.12734 | 0.13182 | 0.08557 | 0.09954 | 0.09299 | 0.09288 | 0.09804 |

|        |             |         |         |         |         |         |         |         |         |         |         |         |         |
|--------|-------------|---------|---------|---------|---------|---------|---------|---------|---------|---------|---------|---------|---------|
| Q8BWU5 | OSGEP_MOUSE | 0.00000 | 0.00000 | 0.00000 | 0.00000 | 0.00000 | 0.00000 | 0.00640 | 0.00000 | 0.00000 | 0.00000 | 0.00308 | 0.00000 |
| Q8BWW9 | PKN2_MOUSE  | 0.00000 | 0.00000 | 0.00000 | 0.00000 | 0.00000 | 0.00000 | 0.00556 | 0.00464 | 0.00502 | 0.00641 | 0.00381 | 0.00556 |
| Q8BWW2 | CLC1A_MOUSE | 0.00000 | 0.00000 | 0.00000 | 0.00000 | 0.00000 | 0.00000 | 0.00000 | 0.00154 | 0.00000 | 0.00000 | 0.00073 | 0.00000 |
| Q8BWW3 | ERF1_MOUSE  | 0.00000 | 0.00000 | 0.00000 | 0.00000 | 0.00000 | 0.00000 | 0.01353 | 0.01053 | 0.00843 | 0.00978 | 0.00569 | 0.00853 |
| Q8BWZ3 | NAA25_MOUSE | 0.00000 | 0.00000 | 0.00000 | 0.00000 | 0.00000 | 0.00000 | 0.00000 | 0.00000 | 0.00000 | 0.00028 | 0.00000 | 0.00062 |
| Q8BX02 | KANK2_MOUSE | 0.00107 | 0.00043 | 0.00127 | 0.00083 | 0.00330 | 0.00115 | 0.01121 | 0.02754 | 0.03195 | 0.02533 | 0.02877 | 0.03191 |
| Q8BX70 | VP13C_MOUSE | 0.00408 | 0.01179 | 0.00746 | 0.01243 | 0.00627 | 0.00706 | 0.01150 | 0.00935 | 0.01165 | 0.00976 | 0.01123 | 0.00983 |
| Q8BXK8 | AGAP1_MOUSE | 0.00000 | 0.00000 | 0.00000 | 0.00000 | 0.00000 | 0.00000 | 0.00000 | 0.00464 | 0.00639 | 0.00578 | 0.00290 | 0.00233 |
| Q8BXK9 | CLIC5_MOUSE | 0.00392 | 0.00383 | 0.00304 | 0.00562 | 0.00337 | 0.00480 | 0.15760 | 0.14209 | 0.20262 | 0.15068 | 0.21116 | 0.20657 |
| Q8BXR9 | OSBL6_MOUSE | 0.00000 | 0.00000 | 0.00000 | 0.00000 | 0.00000 | 0.00000 | 0.00503 | 0.00788 | 0.00811 | 0.00485 | 0.01144 | 0.01003 |
| Q8BXZ1 | TMX3_MOUSE  | 0.00345 | 0.00340 | 0.00229 | 0.00137 | 0.00214 | 0.00405 | 0.00092 | 0.00430 | 0.01248 | 0.00643 | 0.00326 | 0.00840 |
| Q8BY87 | UBP47_MOUSE | 0.00000 | 0.00000 | 0.00000 | 0.00000 | 0.00000 | 0.00000 | 0.00138 | 0.00341 | 0.00308 | 0.00201 | 0.00119 | 0.00281 |
| Q8BY89 | CTL2_MOUSE  | 0.00066 | 0.00091 | 0.00048 | 0.00040 | 0.00046 | 0.00105 | 0.01486 | 0.02340 | 0.02515 | 0.01817 | 0.02187 | 0.02065 |
| Q8BYA0 | TBCD_MOUSE  | 0.00000 | 0.00000 | 0.00000 | 0.00000 | 0.00000 | 0.00000 | 0.00496 | 0.00229 | 0.00367 | 0.00459 | 0.00432 | 0.00482 |
| Q8BYF6 | SC5A8_MOUSE | 0.00000 | 0.00000 | 0.00000 | 0.00000 | 0.00000 | 0.00000 | 0.00000 | 0.00000 | 0.00022 | 0.00012 | 0.00000 | 0.00000 |
| Q8BYK6 | YTHD3_MOUSE | 0.00000 | 0.00000 | 0.00000 | 0.00000 | 0.00000 | 0.00000 | 0.00098 | 0.00088 | 0.00219 | 0.00039 | 0.00217 | 0.00000 |
| Q8BYM7 | RSH4A_MOUSE | 0.00000 | 0.00000 | 0.00000 | 0.00000 | 0.00000 | 0.00000 | 0.00033 | 0.00038 | 0.00068 | 0.00121 | 0.00157 | 0.00181 |
| Q8BYY4 | TT39B_MOUSE | 0.00000 | 0.00000 | 0.00000 | 0.00000 | 0.00000 | 0.00000 | 0.00040 | 0.00350 | 0.00000 | 0.00066 | 0.00148 | 0.00047 |
| Q8BZ03 | KPCD2_MOUSE | 0.00000 | 0.00000 | 0.00000 | 0.00000 | 0.00000 | 0.00000 | 0.00239 | 0.00396 | 0.00617 | 0.00448 | 0.00680 | 0.00656 |
| Q8BZ09 | ODC_MOUSE   | 0.00000 | 0.00000 | 0.00000 | 0.00000 | 0.00000 | 0.00000 | 0.00000 | 0.00145 | 0.00025 | 0.00031 | 0.00000 | 0.00102 |
| Q8BZ98 | DYN3_MOUSE  | 0.00000 | 0.00000 | 0.00000 | 0.00000 | 0.00000 | 0.00000 | 0.00844 | 0.00460 | 0.00983 | 0.00741 | 0.01015 | 0.01207 |
| Q8BZF8 | PGM5_MOUSE  | 0.02487 | 0.02176 | 0.01838 | 0.01195 | 0.02074 | 0.02114 | 0.15020 | 0.13728 | 0.07331 | 0.10613 | 0.10808 | 0.10798 |
| Q8BZW8 | NHLC2_MOUSE | 0.00585 | 0.00303 | 0.00290 | 0.00432 | 0.00296 | 0.00265 | 0.01409 | 0.00372 | 0.01026 | 0.00615 | 0.00531 | 0.00855 |
| Q8BZZ3 | WWP1_MOUSE  | 0.00000 | 0.00000 | 0.00000 | 0.00000 | 0.00000 | 0.00000 | 0.00681 | 0.00180 | 0.00970 | 0.00676 | 0.01080 | 0.00806 |
| Q8C052 | MAP1S_MOUSE | 0.00000 | 0.00000 | 0.00000 | 0.00000 | 0.00000 | 0.00000 | 0.00000 | 0.00000 | 0.00256 | 0.00132 | 0.00092 | 0.00071 |
| Q8C079 | STRP1_MOUSE | 0.00000 | 0.00000 | 0.00000 | 0.00000 | 0.00000 | 0.00000 | 0.00439 | 0.00077 | 0.00513 | 0.00348 | 0.00634 | 0.00489 |
| Q8C0C7 | SYFA_MOUSE  | 0.00414 | 0.00887 | 0.00344 | 0.00279 | 0.00272 | 0.00332 | 0.00176 | 0.00319 | 0.00285 | 0.00308 | 0.00304 | 0.00339 |
| Q8C0D4 | RHG12_MOUSE | 0.00000 | 0.00000 | 0.00000 | 0.00000 | 0.00000 | 0.00000 | 0.00000 | 0.00000 | 0.00179 | 0.00088 | 0.00000 | 0.00122 |
| Q8C0D5 | EFL1_MOUSE  | 0.00000 | 0.00000 | 0.00000 | 0.00000 | 0.00000 | 0.00000 | 0.00000 | 0.00000 | 0.00233 | 0.00437 | 0.00284 | 0.00480 |
| Q8C0E2 | VP26B_MOUSE | 0.00000 | 0.00000 | 0.00000 | 0.00000 | 0.00000 | 0.00000 | 0.00910 | 0.00896 | 0.00873 | 0.00957 | 0.01024 | 0.00792 |
| Q8C0I1 | ADAS_MOUSE  | 0.00000 | 0.00000 | 0.00000 | 0.00000 | 0.00000 | 0.00000 | 0.00381 | 0.00219 | 0.00486 | 0.00272 | 0.00809 | 0.00533 |
| Q8C0L0 | TMX4_MOUSE  | 0.00339 | 0.00333 | 0.00271 | 0.00263 | 0.00271 | 0.00290 | 0.00649 | 0.00667 | 0.00724 | 0.00570 | 0.00532 | 0.00573 |
| Q8C0L6 | PAOX_MOUSE  | 0.00000 | 0.00000 | 0.00000 | 0.00000 | 0.00000 | 0.00000 | 0.00042 | 0.00058 | 0.00107 | 0.00134 | 0.00000 | 0.00232 |
| Q8C129 | LCAP_MOUSE  | 0.00293 | 0.00142 | 0.00299 | 0.00395 | 0.00179 | 0.00254 | 0.00255 | 0.00662 | 0.00718 | 0.00539 | 0.00502 | 0.00838 |







|        |             |         |         |         |         |         |         |         |         |         |         |         |         |
|--------|-------------|---------|---------|---------|---------|---------|---------|---------|---------|---------|---------|---------|---------|
| Q8CAQ8 | MIC60_MOUSE | 0.20783 | 0.14578 | 0.18226 | 0.17959 | 0.15615 | 0.17452 | 0.04251 | 0.04239 | 0.03724 | 0.03832 | 0.03042 | 0.03607 |
| Q8CAY6 | THIC_MOUSE  | 0.00000 | 0.00000 | 0.00000 | 0.00000 | 0.00000 | 0.00000 | 0.01083 | 0.01206 | 0.01760 | 0.00499 | 0.00944 | 0.00604 |
| Q8CBA2 | SLFN5_MOUSE | 0.00000 | 0.00000 | 0.00000 | 0.00000 | 0.00000 | 0.00000 | 0.00092 | 0.00160 | 0.01452 | 0.00635 | 0.01009 | 0.00830 |
| Q8CBE3 | WDR37_MOUSE | 0.00000 | 0.00000 | 0.00000 | 0.00000 | 0.00000 | 0.00000 | 0.00501 | 0.00629 | 0.00131 | 0.00338 | 0.00214 | 0.00513 |
| Q8CBW3 | ABI1_MOUSE  | 0.00000 | 0.00000 | 0.00000 | 0.00000 | 0.00000 | 0.00000 | 0.01251 | 0.01233 | 0.01574 | 0.01364 | 0.01661 | 0.01565 |
| Q8CBy8 | DCTN4_MOUSE | 0.00000 | 0.00000 | 0.00000 | 0.00000 | 0.00000 | 0.00000 | 0.00601 | 0.01043 | 0.00871 | 0.00878 | 0.00952 | 0.01267 |
| Q8CC35 | SYNPO_MOUSE | 0.00580 | 0.00483 | 0.00461 | 0.00743 | 0.00555 | 0.00431 | 0.01752 | 0.01215 | 0.01472 | 0.01201 | 0.00610 | 0.01499 |
| Q8CC86 | PNCB_MOUSE  | 0.00000 | 0.00000 | 0.00000 | 0.00000 | 0.00000 | 0.00000 | 0.01091 | 0.01173 | 0.01652 | 0.02799 | 0.01026 | 0.01431 |
| Q8CC88 | VWA8_MOUSE  | 0.06502 | 0.09318 | 0.07146 | 0.06151 | 0.08390 | 0.08014 | 0.00078 | 0.00003 | 0.00030 | 0.00103 | 0.00016 | 0.00069 |
| Q8CCF0 | PRP31_MOUSE | 0.00000 | 0.00000 | 0.00000 | 0.00000 | 0.00000 | 0.00000 | 0.00290 | 0.00069 | 0.00501 | 0.00209 | 0.00614 | 0.00656 |
| Q8CCH2 | NHLC3_MOUSE | 0.00000 | 0.00000 | 0.00000 | 0.00000 | 0.00000 | 0.00000 | 0.00000 | 0.00000 | 0.00000 | 0.00000 | 0.00000 | 0.00070 |
| Q8CCJ3 | UFL1_MOUSE  | 0.00000 | 0.00000 | 0.00000 | 0.00000 | 0.00000 | 0.00000 | 0.00768 | 0.00160 | 0.00559 | 0.00426 | 0.00491 | 0.00159 |
| Q8CCK0 | H2AW_MOUSE  | 0.00000 | 0.00000 | 0.00000 | 0.00000 | 0.00000 | 0.00000 | 0.01275 | 0.00790 | 0.01212 | 0.00984 | 0.00891 | 0.01241 |
| Q8CCS6 | PABP2_MOUSE | 0.00000 | 0.00000 | 0.00000 | 0.00000 | 0.00000 | 0.00000 | 0.00759 | 0.00663 | 0.00506 | 0.00473 | 0.00444 | 0.00782 |
| Q8CD10 | MICU2_MOUSE | 0.00000 | 0.00000 | 0.00000 | 0.00000 | 0.00000 | 0.00000 | 0.00000 | 0.00000 | 0.00284 | 0.00000 | 0.00296 | 0.00252 |
| Q8CDA1 | SAC2_MOUSE  | 0.00000 | 0.00000 | 0.00000 | 0.00000 | 0.00000 | 0.00000 | 0.00000 | 0.00000 | 0.00000 | 0.00000 | 0.00000 | 0.00000 |
| Q8CDJ8 | STON1_MOUSE | 0.00000 | 0.00000 | 0.00000 | 0.00000 | 0.00000 | 0.00000 | 0.00000 | 0.00195 | 0.00207 | 0.00184 | 0.00078 | 0.00109 |
| Q8CDM8 | F16B1_MOUSE | 0.00000 | 0.00000 | 0.00000 | 0.00000 | 0.00000 | 0.00000 | 0.00000 | 0.00069 | 0.00000 | 0.00000 | 0.00015 | 0.00036 |
| Q8CDN6 | TXNL1_MOUSE | 0.00074 | 0.00103 | 0.00080 | 0.00125 | 0.00171 | 0.00160 | 0.01609 | 0.01936 | 0.02292 | 0.03133 | 0.02297 | 0.02282 |
| Q8CEZ4 | MB214_MOUSE | 0.00000 | 0.00000 | 0.00000 | 0.00000 | 0.00000 | 0.00000 | 0.00000 | 0.00048 | 0.00000 | 0.00081 | 0.00111 | 0.00114 |
| Q8CFB4 | GBP5_MOUSE  | 0.00000 | 0.00000 | 0.00000 | 0.00000 | 0.00000 | 0.00000 | 0.00043 | 0.00012 | 0.00063 | 0.00021 | 0.00054 | 0.00031 |
| Q8CFD4 | SNX8_MOUSE  | 0.00000 | 0.00000 | 0.00000 | 0.00000 | 0.00000 | 0.00000 | 0.00000 | 0.00000 | 0.00000 | 0.00000 | 0.00028 | 0.00000 |
| Q8CFE3 | RCOR1_MOUSE | 0.00000 | 0.00000 | 0.00000 | 0.00000 | 0.00000 | 0.00000 | 0.00182 | 0.00000 | 0.00310 | 0.00000 | 0.00000 | 0.00000 |
| Q8CFE4 | SCYL2_MOUSE | 0.00000 | 0.00000 | 0.00000 | 0.00000 | 0.00000 | 0.00000 | 0.00239 | 0.00085 | 0.00394 | 0.00222 | 0.00455 | 0.00324 |
| Q8CFI0 | NED4L_MOUSE | 0.00000 | 0.00000 | 0.00000 | 0.00000 | 0.00000 | 0.00000 | 0.00610 | 0.01135 | 0.00739 | 0.00651 | 0.00660 | 0.00992 |
| Q8CFI7 | RBP2_MOUSE  | 0.00000 | 0.00000 | 0.00000 | 0.00000 | 0.00000 | 0.00000 | 0.00000 | 0.00111 | 0.00000 | 0.00000 | 0.00000 | 0.00000 |
| Q8CFJ7 | S2545_MOUSE | 0.00000 | 0.00000 | 0.00000 | 0.00000 | 0.00000 | 0.00000 | 0.00311 | 0.00536 | 0.00316 | 0.00361 | 0.00000 | 0.00000 |
| Q8CFX1 | G6PE_MOUSE  | 0.00000 | 0.00000 | 0.00000 | 0.00000 | 0.00000 | 0.00000 | 0.01273 | 0.02163 | 0.01676 | 0.01735 | 0.01124 | 0.01955 |
| Q8CG03 | PDE5A_MOUSE | 0.00000 | 0.00000 | 0.00000 | 0.00000 | 0.00000 | 0.00000 | 0.01753 | 0.01897 | 0.01766 | 0.02020 | 0.01860 | 0.01761 |
| Q8CG19 | LTBP1_MOUSE | 0.00000 | 0.00000 | 0.00000 | 0.00000 | 0.00000 | 0.00000 | 0.00142 | 0.00326 | 0.00584 | 0.00182 | 0.00570 | 0.00244 |
| Q8CG50 | RAB43_MOUSE | 0.00000 | 0.00000 | 0.00000 | 0.00000 | 0.00000 | 0.00000 | 0.00000 | 0.00000 | 0.00000 | 0.00000 | 0.00000 | 0.00000 |
| Q8CG72 | ADPRS_MOUSE | 0.00000 | 0.00000 | 0.00000 | 0.00000 | 0.00000 | 0.00000 | 0.00369 | 0.00652 | 0.00555 | 0.00490 | 0.00712 | 0.00718 |
| Q8CG76 | ARK72_MOUSE | 0.01418 | 0.00758 | 0.01806 | 0.00810 | 0.00784 | 0.00931 | 0.01753 | 0.01416 | 0.01970 | 0.01727 | 0.01565 | 0.01455 |
| Q8CG79 | ASPP2_MOUSE | 0.00000 | 0.00000 | 0.00000 | 0.00000 | 0.00000 | 0.00000 | 0.00957 | 0.00135 | 0.00625 | 0.00379 | 0.00637 | 0.00467 |

|        |             |         |         |         |         |         |         |         |         |         |         |         |         |
|--------|-------------|---------|---------|---------|---------|---------|---------|---------|---------|---------|---------|---------|---------|
| Q8CGA0 | PPM1F_MOUSE | 0.00000 | 0.00000 | 0.00000 | 0.00000 | 0.00000 | 0.00000 | 0.00779 | 0.00780 | 0.01521 | 0.01086 | 0.01221 | 0.00752 |
| Q8CGB6 | TNS2_MOUSE  | 0.00000 | 0.00000 | 0.00000 | 0.00000 | 0.00000 | 0.00000 | 0.03287 | 0.04359 | 0.03751 | 0.02895 | 0.03912 | 0.04198 |
| Q8CGC7 | SYEP_MOUSE  | 0.00811 | 0.01380 | 0.01140 | 0.01347 | 0.00837 | 0.00686 | 0.00845 | 0.00615 | 0.00786 | 0.00734 | 0.00845 | 0.00727 |
| Q8CGF1 | RHG29_MOUSE | 0.00000 | 0.00000 | 0.00000 | 0.00000 | 0.00000 | 0.00000 | 0.00000 | 0.00022 | 0.00065 | 0.00000 | 0.00027 | 0.00026 |
| Q8CGF7 | TCRG1_MOUSE | 0.00000 | 0.00000 | 0.00000 | 0.00000 | 0.00000 | 0.00000 | 0.00278 | 0.00000 | 0.00454 | 0.00252 | 0.00102 | 0.00284 |
| Q8CGK3 | LONM_MOUSE  | 0.07567 | 0.04836 | 0.06407 | 0.04665 | 0.07394 | 0.05749 | 0.02300 | 0.01803 | 0.01637 | 0.01697 | 0.01877 | 0.02203 |
| Q8CGN5 | PLIN1_MOUSE | 0.00000 | 0.00000 | 0.00000 | 0.00000 | 0.00000 | 0.00000 | 0.02292 | 0.00131 | 0.03256 | 0.00140 | 0.00017 | 0.00186 |
| Q8CGY8 | OGT1_MOUSE  | 0.00127 | 0.00016 | 0.00056 | 0.00106 | 0.00044 | 0.00119 | 0.00000 | 0.00000 | 0.00382 | 0.00267 | 0.00101 | 0.00152 |
| Q8CH18 | CCAR1_MOUSE | 0.00000 | 0.00000 | 0.00000 | 0.00000 | 0.00000 | 0.00000 | 0.00000 | 0.00119 | 0.00419 | 0.00092 | 0.00181 | 0.00315 |
| Q8CH25 | SLTM_MOUSE  | 0.00000 | 0.00000 | 0.00000 | 0.00000 | 0.00000 | 0.00000 | 0.00153 | 0.00602 | 0.00143 | 0.00261 | 0.00025 | 0.00403 |
| Q8CHD8 | RFIP3_MOUSE | 0.00000 | 0.00000 | 0.00000 | 0.00000 | 0.00000 | 0.00000 | 0.00000 | 0.00000 | 0.00000 | 0.00000 | 0.00000 | 0.00000 |
| Q8CHE4 | PHLP1_MOUSE | 0.00000 | 0.00000 | 0.00000 | 0.00000 | 0.00000 | 0.00000 | 0.00000 | 0.00000 | 0.00000 | 0.00000 | 0.00000 | 0.00000 |
| Q8CHH9 | SEPT8_MOUSE | 0.00000 | 0.00000 | 0.00000 | 0.00000 | 0.00000 | 0.00000 | 0.01161 | 0.01504 | 0.02725 | 0.01731 | 0.02198 | 0.01396 |
| Q8CHK3 | MBOA7_MOUSE | 0.00000 | 0.00000 | 0.00000 | 0.00000 | 0.00000 | 0.00000 | 0.00190 | 0.00476 | 0.00185 | 0.00260 | 0.00239 | 0.00293 |
| Q8CHP5 | PYM1_MOUSE  | 0.00000 | 0.00000 | 0.00000 | 0.00000 | 0.00000 | 0.00000 | 0.00000 | 0.00103 | 0.00238 | 0.00497 | 0.00388 | 0.00363 |
| Q8CHP8 | PGP_MOUSE   | 0.01364 | 0.00790 | 0.00981 | 0.01264 | 0.01071 | 0.01141 | 0.00000 | 0.00318 | 0.00632 | 0.00456 | 0.00257 | 0.00435 |
| Q8CHR6 | DPYD_MOUSE  | 0.00000 | 0.00000 | 0.00000 | 0.00000 | 0.00000 | 0.00000 | 0.00000 | 0.00000 | 0.00228 | 0.00000 | 0.00000 | 0.00000 |
| Q8CHS8 | VP37A_MOUSE | 0.00000 | 0.00000 | 0.00000 | 0.00000 | 0.00000 | 0.00000 | 0.00000 | 0.00000 | 0.00000 | 0.00000 | 0.00000 | 0.00000 |
| Q8CHT0 | AL4A1_MOUSE | 0.04492 | 0.05043 | 0.02914 | 0.02705 | 0.03886 | 0.05543 | 0.03741 | 0.04422 | 0.04328 | 0.03580 | 0.03930 | 0.03813 |
| Q8CHU3 | EPN2_MOUSE  | 0.00000 | 0.00000 | 0.00000 | 0.00000 | 0.00000 | 0.00000 | 0.00409 | 0.00853 | 0.01211 | 0.01090 | 0.01147 | 0.01226 |
| Q8CHW4 | EI2BE_MOUSE | 0.00000 | 0.00000 | 0.00000 | 0.00000 | 0.00000 | 0.00000 | 0.00000 | 0.00051 | 0.00069 | 0.00000 | 0.00115 | 0.00181 |
| Q8CI08 | SLAI2_MOUSE | 0.00000 | 0.00000 | 0.00000 | 0.00000 | 0.00000 | 0.00000 | 0.00471 | 0.00455 | 0.00399 | 0.00468 | 0.00478 | 0.00297 |
| Q8CI12 | SMTL2_MOUSE | 0.00000 | 0.00000 | 0.00000 | 0.00000 | 0.00000 | 0.00000 | 0.00000 | 0.00000 | 0.00294 | 0.00000 | 0.00130 | 0.00000 |
| Q8CI32 | BAG5_MOUSE  | 0.00253 | 0.00140 | 0.00080 | 0.00182 | 0.00082 | 0.00131 | 0.00237 | 0.00297 | 0.00423 | 0.00365 | 0.00570 | 0.00448 |
| Q8CI51 | PDLI5_MOUSE | 0.01348 | 0.00225 | 0.01470 | 0.01575 | 0.00591 | 0.00359 | 0.03027 | 0.02302 | 0.02830 | 0.02336 | 0.03103 | 0.01941 |
| Q8CI59 | STEA3_MOUSE | 0.00000 | 0.00000 | 0.00000 | 0.00000 | 0.00000 | 0.00000 | 0.00085 | 0.00000 | 0.00212 | 0.00000 | 0.00177 | 0.00000 |
| Q8CI78 | RMND1_MOUSE | 0.00000 | 0.00000 | 0.00000 | 0.00000 | 0.00000 | 0.00000 | 0.00000 | 0.00354 | 0.00644 | 0.00409 | 0.00676 | 0.00704 |
| Q8CI94 | PYGB_MOUSE  | 0.13760 | 0.14390 | 0.29421 | 0.23837 | 0.21903 | 0.20918 | 0.04774 | 0.03479 | 0.05182 | 0.04684 | 0.04926 | 0.04374 |
| Q8CIB5 | FERM2_MOUSE | 0.00719 | 0.00717 | 0.01266 | 0.00659 | 0.00744 | 0.00578 | 0.14650 | 0.14411 | 0.17219 | 0.15116 | 0.16899 | 0.14891 |
| Q8CIE6 | COPA_MOUSE  | 0.00000 | 0.00000 | 0.00000 | 0.00000 | 0.00000 | 0.00000 | 0.03098 | 0.02502 | 0.03694 | 0.02908 | 0.03838 | 0.02949 |
| Q8CIF4 | BTD_MOUSE   | 0.00000 | 0.00000 | 0.00000 | 0.00000 | 0.00000 | 0.00000 | 0.00000 | 0.00000 | 0.00000 | 0.00000 | 0.00000 | 0.00000 |
| Q8CIH5 | PLCG2_MOUSE | 0.00000 | 0.00000 | 0.00000 | 0.00000 | 0.00000 | 0.00000 | 0.01157 | 0.01230 | 0.01071 | 0.01205 | 0.00644 | 0.01752 |
| Q8CIM7 | CP2DQ_MOUSE | 0.00000 | 0.00000 | 0.00000 | 0.00000 | 0.00000 | 0.00000 | 0.01120 | 0.00630 | 0.01394 | 0.01016 | 0.02131 | 0.01380 |
| Q8CIN4 | PAK2_MOUSE  | 0.00000 | 0.00000 | 0.00000 | 0.00000 | 0.00000 | 0.00000 | 0.01941 | 0.02675 | 0.03646 | 0.03006 | 0.03515 | 0.02473 |



|        |             |         |         |         |         |         |         |         |         |         |         |         |         |
|--------|-------------|---------|---------|---------|---------|---------|---------|---------|---------|---------|---------|---------|---------|
| Q8K124 | PKHO2_MOUSE | 0.00000 | 0.00000 | 0.00000 | 0.00000 | 0.00000 | 0.00000 | 0.00412 | 0.00000 | 0.00696 | 0.00482 | 0.01454 | 0.00537 |
| Q8K157 | GALM_MOUSE  | 0.00000 | 0.00000 | 0.00000 | 0.00000 | 0.00000 | 0.00000 | 0.00000 | 0.00168 | 0.00077 | 0.00121 | 0.00074 | 0.00089 |
| Q8K182 | CO8A_MOUSE  | 0.00000 | 0.00000 | 0.00000 | 0.00000 | 0.00000 | 0.00000 | 0.00999 | 0.00717 | 0.00198 | 0.00063 | 0.00675 | 0.00010 |
| Q8K183 | PDXK_MOUSE  | 0.00000 | 0.00000 | 0.00000 | 0.00000 | 0.00000 | 0.00000 | 0.01088 | 0.01447 | 0.01714 | 0.01536 | 0.01392 | 0.01206 |
| Q8K1B8 | URP2_MOUSE  | 0.00000 | 0.00000 | 0.00000 | 0.00000 | 0.00000 | 0.00000 | 0.01609 | 0.00995 | 0.02151 | 0.02669 | 0.01831 | 0.02078 |
| Q8K1E0 | STX5_MOUSE  | 0.00000 | 0.00000 | 0.00000 | 0.00000 | 0.00000 | 0.00000 | 0.00625 | 0.00715 | 0.00466 | 0.00599 | 0.00534 | 0.00471 |
| Q8K1J6 | TRNT1_MOUSE | 0.00000 | 0.00000 | 0.00000 | 0.00000 | 0.00000 | 0.00000 | 0.01304 | 0.01540 | 0.01795 | 0.01487 | 0.02234 | 0.02090 |
| Q8K1L5 | PP1RB_MOUSE | 0.00000 | 0.00000 | 0.00000 | 0.00000 | 0.00000 | 0.00000 | 0.00000 | 0.00000 | 0.00094 | 0.00093 | 0.00046 | 0.00000 |
| Q8K1M6 | DNM1L_MOUSE | 0.01224 | 0.01583 | 0.02270 | 0.01903 | 0.02238 | 0.02337 | 0.01246 | 0.01356 | 0.01417 | 0.01321 | 0.01379 | 0.01431 |
| Q8K1N2 | PHLB2_MOUSE | 0.00000 | 0.00000 | 0.00000 | 0.00000 | 0.00000 | 0.00000 | 0.00549 | 0.00473 | 0.00715 | 0.00528 | 0.00564 | 0.00273 |
| Q8K1R3 | PNPT1_MOUSE | 0.00185 | 0.00130 | 0.00140 | 0.00126 | 0.00133 | 0.00124 | 0.00000 | 0.00000 | 0.00000 | 0.00000 | 0.00128 | 0.00000 |
| Q8K1R7 | NEK9_MOUSE  | 0.00000 | 0.00000 | 0.00000 | 0.00000 | 0.00000 | 0.00000 | 0.00477 | 0.00378 | 0.00571 | 0.00504 | 0.00578 | 0.00516 |
| Q8K1X1 | WDR11_MOUSE | 0.00000 | 0.00000 | 0.00000 | 0.00000 | 0.00000 | 0.00000 | 0.01124 | 0.00936 | 0.01208 | 0.00810 | 0.00516 | 0.01159 |
| Q8K1Z0 | COQ9_MOUSE  | 0.03680 | 0.03050 | 0.03328 | 0.05316 | 0.04531 | 0.01272 | 0.00118 | 0.00555 | 0.00589 | 0.00561 | 0.00132 | 0.00248 |
| Q8K212 | PACS1_MOUSE | 0.00000 | 0.00000 | 0.00000 | 0.00000 | 0.00000 | 0.00000 | 0.00455 | 0.00240 | 0.00487 | 0.00208 | 0.00446 | 0.00244 |
| Q8K221 | ARFP2_MOUSE | 0.00000 | 0.00000 | 0.00000 | 0.00000 | 0.00000 | 0.00000 | 0.00000 | 0.00000 | 0.00000 | 0.00000 | 0.00116 | 0.00114 |
| Q8K273 | MMGT1_MOUSE | 0.00000 | 0.00000 | 0.00000 | 0.00000 | 0.00000 | 0.00000 | 0.00000 | 0.00141 | 0.00000 | 0.00107 | 0.00000 | 0.00000 |
| Q8K274 | KT3K_MOUSE  | 0.00000 | 0.00000 | 0.00000 | 0.00000 | 0.00000 | 0.00000 | 0.00000 | 0.00090 | 0.00185 | 0.00169 | 0.00084 | 0.00087 |
| Q8K297 | GT251_MOUSE | 0.00000 | 0.00000 | 0.00000 | 0.00000 | 0.00000 | 0.00000 | 0.00128 | 0.00198 | 0.00568 | 0.00305 | 0.00307 | 0.00547 |
| Q8K2A1 | GULP1_MOUSE | 0.00000 | 0.00000 | 0.00000 | 0.00000 | 0.00000 | 0.00000 | 0.00000 | 0.00745 | 0.00123 | 0.00577 | 0.00000 | 0.00182 |
| Q8K2B3 | SDHA_MOUSE  | 0.75981 | 0.53408 | 0.95580 | 0.91757 | 0.94046 | 0.55475 | 0.02651 | 0.02855 | 0.03355 | 0.03161 | 0.01819 | 0.02727 |
| Q8K2C6 | SIR5_MOUSE  | 0.01523 | 0.01159 | 0.01071 | 0.01453 | 0.01525 | 0.01534 | 0.00113 | 0.00000 | 0.00298 | 0.00118 | 0.00124 | 0.00109 |
| Q8K2C9 | HACD3_MOUSE | 0.00000 | 0.00000 | 0.00000 | 0.00000 | 0.00000 | 0.00000 | 0.03036 | 0.01566 | 0.03944 | 0.02790 | 0.04813 | 0.03061 |
| Q8K2F8 | LS14A_MOUSE | 0.00000 | 0.00000 | 0.00000 | 0.00000 | 0.00000 | 0.00000 | 0.01098 | 0.01063 | 0.00819 | 0.00925 | 0.01165 | 0.00695 |
| Q8K2H2 | OTU6B_MOUSE | 0.00000 | 0.00000 | 0.00000 | 0.00000 | 0.00000 | 0.00000 | 0.00254 | 0.01060 | 0.00259 | 0.00366 | 0.00710 | 0.00567 |
| Q8K2I1 | FNTB_MOUSE  | 0.00000 | 0.00000 | 0.00000 | 0.00000 | 0.00000 | 0.00000 | 0.01960 | 0.00326 | 0.00355 | 0.00490 | 0.00274 | 0.00448 |
| Q8K2I3 | FMO2_MOUSE  | 0.00638 | 0.00997 | 0.00275 | 0.00401 | 0.00365 | 0.00372 | 0.27292 | 0.26832 | 0.29190 | 0.26542 | 0.26598 | 0.29807 |
| Q8K2K6 | AGFG1_MOUSE | 0.00000 | 0.00000 | 0.00000 | 0.00000 | 0.00000 | 0.00000 | 0.00956 | 0.01000 | 0.01733 | 0.00941 | 0.01948 | 0.01404 |
| Q8K2L8 | TPC12_MOUSE | 0.00000 | 0.00000 | 0.00000 | 0.00000 | 0.00000 | 0.00000 | 0.00595 | 0.01351 | 0.00941 | 0.01402 | 0.01655 | 0.01164 |
| Q8K2M0 | RM38_MOUSE  | 0.00000 | 0.00000 | 0.00000 | 0.00000 | 0.00000 | 0.00000 | 0.00000 | 0.00000 | 0.00000 | 0.00000 | 0.00000 | 0.00000 |
| Q8K2Q7 | BROX_MOUSE  | 0.00000 | 0.00000 | 0.00000 | 0.00000 | 0.00000 | 0.00000 | 0.00559 | 0.00000 | 0.00402 | 0.00378 | 0.00199 | 0.00407 |
| Q8K2Q9 | SHOT1_MOUSE | 0.00000 | 0.00000 | 0.00000 | 0.00000 | 0.00000 | 0.00000 | 0.00000 | 0.00308 | 0.01128 | 0.00564 | 0.00638 | 0.00362 |
| Q8K2T1 | NMRL1_MOUSE | 0.00000 | 0.00000 | 0.00000 | 0.00000 | 0.00000 | 0.00000 | 0.00098 | 0.00000 | 0.00389 | 0.00076 | 0.00331 | 0.00202 |
| Q8K2Y3 | EVA1B_MOUSE | 0.00000 | 0.00000 | 0.00000 | 0.00000 | 0.00000 | 0.00000 | 0.02668 | 0.02184 | 0.02498 | 0.02634 | 0.03975 | 0.03983 |

|        |             |         |         |         |         |         |         |         |         |         |         |         |         |
|--------|-------------|---------|---------|---------|---------|---------|---------|---------|---------|---------|---------|---------|---------|
| Q8K310 | MATR3_MOUSE | 0.00297 | 0.00380 | 0.00413 | 0.00550 | 0.00409 | 0.00616 | 0.01802 | 0.01762 | 0.02682 | 0.02472 | 0.01763 | 0.02404 |
| Q8K337 | I5P2_MOUSE  | 0.00000 | 0.00000 | 0.00000 | 0.00000 | 0.00000 | 0.00000 | 0.00351 | 0.00571 | 0.00959 | 0.00650 | 0.00751 | 0.00703 |
| Q8K353 | CYTM1_MOUSE | 0.00000 | 0.00000 | 0.00000 | 0.00000 | 0.00000 | 0.00000 | 0.00000 | 0.00000 | 0.00547 | 0.01612 | 0.00150 | 0.00569 |
| Q8K354 | CBR3_MOUSE  | 0.00000 | 0.00000 | 0.00000 | 0.00000 | 0.00000 | 0.00000 | 0.01475 | 0.01413 | 0.01466 | 0.01393 | 0.01241 | 0.01320 |
| Q8K370 | ACD10_MOUSE | 0.03121 | 0.02095 | 0.02955 | 0.01722 | 0.02925 | 0.03481 | 0.00703 | 0.00583 | 0.00958 | 0.00774 | 0.00855 | 0.00866 |
| Q8K3A0 | HSC20_MOUSE | 0.00347 | 0.00531 | 0.00298 | 0.00230 | 0.00470 | 0.00301 | 0.00650 | 0.00755 | 0.00000 | 0.00287 | 0.00000 | 0.00670 |
| Q8K3C3 | LZIC_MOUSE  | 0.00000 | 0.00000 | 0.00000 | 0.00000 | 0.00000 | 0.00000 | 0.00372 | 0.00737 | 0.00328 | 0.00412 | 0.00127 | 0.00204 |
| Q8K3H0 | DP13A_MOUSE | 0.00174 | 0.00202 | 0.00114 | 0.00132 | 0.00752 | 0.00148 | 0.00672 | 0.00875 | 0.01027 | 0.00797 | 0.00670 | 0.01008 |
| Q8K3J1 | NDUS8_MOUSE | 0.03365 | 0.05372 | 0.01038 | 0.01040 | 0.01708 | 0.03442 | 0.01060 | 0.01537 | 0.01203 | 0.00818 | 0.00894 | 0.01000 |
| Q8K411 | PREP_MOUSE  | 0.01180 | 0.00705 | 0.01193 | 0.01167 | 0.01464 | 0.00669 | 0.00670 | 0.00448 | 0.00545 | 0.00471 | 0.00527 | 0.00484 |
| Q8K440 | ABC8B_MOUSE | 0.00000 | 0.00000 | 0.00000 | 0.00000 | 0.00000 | 0.00000 | 0.00360 | 0.00358 | 0.00155 | 0.00384 | 0.00492 | 0.00467 |
| Q8K4F5 | ABHDB_MOUSE | 0.00000 | 0.00000 | 0.00000 | 0.00000 | 0.00000 | 0.00000 | 0.00181 | 0.00312 | 0.00401 | 0.00265 | 0.00235 | 0.00310 |
| Q8K4G1 | LTBP4_MOUSE | 0.00008 | 0.00196 | 0.00163 | 0.00000 | 0.00055 | 0.00137 | 0.00000 | 0.00267 | 0.00577 | 0.00000 | 0.00356 | 0.00000 |
| Q8K4G5 | ABLM1_MOUSE | 0.00832 | 0.00556 | 0.00996 | 0.00666 | 0.00702 | 0.00428 | 0.01371 | 0.01186 | 0.01794 | 0.00910 | 0.00658 | 0.01190 |
| Q8K4H1 | KFA_MOUSE   | 0.00000 | 0.00000 | 0.00000 | 0.00000 | 0.00000 | 0.00000 | 0.00000 | 0.00000 | 0.00000 | 0.00000 | 0.00000 | 0.00000 |
| Q8K4K6 | PANK1_MOUSE | 0.00000 | 0.00000 | 0.00000 | 0.00000 | 0.00000 | 0.00000 | 0.00000 | 0.00000 | 0.00000 | 0.00000 | 0.00000 | 0.00000 |
| Q8K4L3 | SVIL_MOUSE  | 0.01090 | 0.02087 | 0.00786 | 0.01213 | 0.00875 | 0.01156 | 0.01774 | 0.02496 | 0.02812 | 0.02671 | 0.02870 | 0.02700 |
| Q8K4Q8 | COL12_MOUSE | 0.00000 | 0.00000 | 0.00000 | 0.00000 | 0.00000 | 0.00000 | 0.00797 | 0.00313 | 0.02677 | 0.01932 | 0.01962 | 0.01171 |
| Q8K4X7 | PLCD_MOUSE  | 0.00000 | 0.00000 | 0.00000 | 0.00000 | 0.00000 | 0.00000 | 0.00182 | 0.00239 | 0.00502 | 0.00338 | 0.00316 | 0.00433 |
| Q8K4Z3 | NNRE_MOUSE  | 0.02874 | 0.02174 | 0.03278 | 0.01144 | 0.02593 | 0.01556 | 0.05850 | 0.06969 | 0.04612 | 0.04666 | 0.03426 | 0.05662 |
| Q8K4Z5 | SF3A1_MOUSE | 0.00000 | 0.00000 | 0.00000 | 0.00000 | 0.00000 | 0.00000 | 0.01781 | 0.00899 | 0.01103 | 0.00718 | 0.00902 | 0.00923 |
| Q8K558 | TRML1_MOUSE | 0.00000 | 0.00000 | 0.00000 | 0.00000 | 0.00000 | 0.00000 | 0.00000 | 0.00000 | 0.00096 | 0.00123 | 0.00000 | 0.00000 |
| Q8K5B2 | MCFD2_MOUSE | 0.00000 | 0.00000 | 0.00000 | 0.00000 | 0.00000 | 0.00000 | 0.00000 | 0.00181 | 0.00948 | 0.00833 | 0.01261 | 0.00731 |
| Q8N7N5 | DCAF8_MOUSE | 0.00000 | 0.00000 | 0.00000 | 0.00000 | 0.00000 | 0.00000 | 0.00000 | 0.00468 | 0.00096 | 0.00152 | 0.00000 | 0.00000 |
| Q8QZR5 | ALAT1_MOUSE | 0.00348 | 0.00685 | 0.00611 | 0.00324 | 0.00336 | 0.00388 | 0.00099 | 0.00929 | 0.00422 | 0.00205 | 0.00233 | 0.00590 |
| Q8QZS1 | HIBCH_MOUSE | 0.01804 | 0.03007 | 0.04480 | 0.03367 | 0.07287 | 0.05793 | 0.02050 | 0.01744 | 0.01610 | 0.01077 | 0.01732 | 0.01453 |
| Q8QZT1 | THIL_MOUSE  | 0.58055 | 0.53354 | 0.52899 | 0.55167 | 0.50157 | 0.47484 | 0.04115 | 0.06156 | 0.05865 | 0.05173 | 0.03487 | 0.05494 |
| Q8QZW3 | F151A_MOUSE | 0.00000 | 0.00000 | 0.00000 | 0.00000 | 0.00000 | 0.00000 | 0.00000 | 0.00258 | 0.00414 | 0.00711 | 0.00901 | 0.00474 |
| Q8QZY1 | EIF3L_MOUSE | 0.01211 | 0.01108 | 0.01285 | 0.00628 | 0.01095 | 0.00384 | 0.02518 | 0.02031 | 0.01850 | 0.02128 | 0.02145 | 0.02270 |
| Q8QZY2 | GLCTK_MOUSE | 0.00000 | 0.00000 | 0.00000 | 0.00000 | 0.00000 | 0.00000 | 0.00742 | 0.00000 | 0.00885 | 0.00769 | 0.00174 | 0.00000 |
| Q8QZY6 | TSN14_MOUSE | 0.00000 | 0.00000 | 0.00000 | 0.00000 | 0.00000 | 0.00000 | 0.00176 | 0.00043 | 0.00138 | 0.00211 | 0.00000 | 0.00143 |
| Q8QZY9 | SF3B4_MOUSE | 0.00000 | 0.00000 | 0.00000 | 0.00000 | 0.00000 | 0.00000 | 0.00097 | 0.00361 | 0.00497 | 0.00372 | 0.00605 | 0.00503 |
| Q8R001 | MARE2_MOUSE | 0.00000 | 0.00000 | 0.00000 | 0.00000 | 0.00000 | 0.00000 | 0.00552 | 0.00705 | 0.01012 | 0.00558 | 0.00612 | 0.00701 |
| Q8R010 | AIMP2_MOUSE | 0.00168 | 0.00272 | 0.00516 | 0.00343 | 0.00386 | 0.00217 | 0.00046 | 0.00092 | 0.00189 | 0.00234 | 0.00207 | 0.00157 |



|        |             |         |         |         |         |         |         |         |         |         |         |         |         |
|--------|-------------|---------|---------|---------|---------|---------|---------|---------|---------|---------|---------|---------|---------|
| Q8R016 | BLMH_MOUSE  | 0.00545 | 0.00473 | 0.00432 | 0.00630 | 0.00553 | 0.00662 | 0.01720 | 0.01342 | 0.01381 | 0.01828 | 0.01572 | 0.01546 |
| Q8R034 | APC13_MOUSE | 0.00000 | 0.00000 | 0.00000 | 0.00000 | 0.00000 | 0.00000 | 0.00834 | 0.00265 | 0.00000 | 0.00265 | 0.00000 | 0.00160 |
| Q8R050 | ERF3A_MOUSE | 0.00244 | 0.00388 | 0.00166 | 0.00216 | 0.00201 | 0.00503 | 0.00584 | 0.00516 | 0.00523 | 0.00413 | 0.00663 | 0.00322 |
| Q8R059 | GALE_MOUSE  | 0.00000 | 0.00000 | 0.00000 | 0.00000 | 0.00000 | 0.00000 | 0.00207 | 0.00088 | 0.00165 | 0.00445 | 0.00000 | 0.00310 |
| Q8R081 | HNRPL_MOUSE | 0.00792 | 0.01179 | 0.00806 | 0.00910 | 0.00791 | 0.00785 | 0.03661 | 0.02779 | 0.04764 | 0.03475 | 0.04605 | 0.03756 |
| Q8R086 | SUOX_MOUSE  | 0.00591 | 0.00174 | 0.00752 | 0.00171 | 0.00499 | 0.00240 | 0.00360 | 0.00225 | 0.00381 | 0.00202 | 0.00125 | 0.00456 |
| Q8R0F8 | FAHD1_MOUSE | 0.00097 | 0.00139 | 0.00132 | 0.00205 | 0.00169 | 0.00468 | 0.00110 | 0.00121 | 0.00108 | 0.00162 | 0.00000 | 0.00287 |
| Q8R0F9 | S14L4_MOUSE | 0.00000 | 0.00000 | 0.00000 | 0.00000 | 0.00000 | 0.00000 | 0.00944 | 0.02337 | 0.02810 | 0.02229 | 0.01986 | 0.02051 |
| Q8R0G9 | NU133_MOUSE | 0.00000 | 0.00000 | 0.00000 | 0.00000 | 0.00000 | 0.00000 | 0.00023 | 0.00234 | 0.00000 | 0.00000 | 0.00000 | 0.00000 |
| Q8R0I0 | ACE2_MOUSE  | 0.00000 | 0.00000 | 0.00000 | 0.00000 | 0.00000 | 0.00000 | 0.00000 | 0.00000 | 0.00000 | 0.00000 | 0.00000 | 0.00000 |
| Q8R0N6 | HOT_MOUSE   | 0.00908 | 0.00583 | 0.00405 | 0.00344 | 0.00928 | 0.00445 | 0.00031 | 0.00025 | 0.00017 | 0.00010 | 0.00011 | 0.00011 |
| Q8R0W0 | EPIPL_MOUSE | 0.00000 | 0.00000 | 0.00000 | 0.00000 | 0.00000 | 0.00000 | 0.00758 | 0.01251 | 0.01081 | 0.01236 | 0.00810 | 0.01064 |
| Q8R0X7 | SGPL1_MOUSE | 0.00000 | 0.00000 | 0.00000 | 0.00000 | 0.00000 | 0.00000 | 0.00559 | 0.00486 | 0.00826 | 0.00596 | 0.00932 | 0.00577 |
| Q8R0Y6 | AL1L1_MOUSE | 0.00000 | 0.00000 | 0.00000 | 0.00000 | 0.00000 | 0.00000 | 0.01025 | 0.01105 | 0.01606 | 0.00865 | 0.01399 | 0.01034 |
| Q8R0Y8 | S2542_MOUSE | 0.00000 | 0.00000 | 0.00000 | 0.00000 | 0.00000 | 0.00000 | 0.00000 | 0.00000 | 0.00000 | 0.00000 | 0.00000 | 0.00000 |
| Q8R123 | FAD1_MOUSE  | 0.00000 | 0.00000 | 0.00000 | 0.00000 | 0.00000 | 0.00000 | 0.00000 | 0.00000 | 0.00000 | 0.00000 | 0.00000 | 0.00000 |
| Q8R138 | TM119_MOUSE | 0.00000 | 0.00000 | 0.00000 | 0.00000 | 0.00000 | 0.00000 | 0.00393 | 0.00314 | 0.00315 | 0.00265 | 0.00436 | 0.00331 |
| Q8R146 | APEH_MOUSE  | 0.00300 | 0.00274 | 0.00225 | 0.00347 | 0.00185 | 0.00059 | 0.01741 | 0.01516 | 0.01778 | 0.01847 | 0.02391 | 0.01575 |
| Q8R164 | BPHL_MOUSE  | 0.03121 | 0.01943 | 0.02784 | 0.02478 | 0.02932 | 0.02258 | 0.01340 | 0.01335 | 0.01330 | 0.00949 | 0.01481 | 0.01015 |
| Q8R180 | ERO1A_MOUSE | 0.00000 | 0.00000 | 0.00000 | 0.00000 | 0.00000 | 0.00000 | 0.00836 | 0.00841 | 0.00991 | 0.01069 | 0.00921 | 0.00890 |
| Q8R1A4 | DOCK7_MOUSE | 0.00000 | 0.00000 | 0.00000 | 0.00000 | 0.00000 | 0.00000 | 0.00534 | 0.00462 | 0.00558 | 0.00477 | 0.00567 | 0.00651 |
| Q8R1B4 | EIF3C_MOUSE | 0.00328 | 0.00417 | 0.00595 | 0.00477 | 0.00361 | 0.00313 | 0.01167 | 0.01562 | 0.01484 | 0.01458 | 0.01306 | 0.01476 |
| Q8R1F1 | NIBA2_MOUSE | 0.00000 | 0.00000 | 0.00000 | 0.00000 | 0.00000 | 0.00000 | 0.19018 | 0.29556 | 0.23390 | 0.22891 | 0.24148 | 0.24045 |
| Q8R1G2 | CMBL_MOUSE  | 0.00362 | 0.00123 | 0.00226 | 0.00396 | 0.00391 | 0.00008 | 0.00000 | 0.00366 | 0.00556 | 0.00309 | 0.00243 | 0.00163 |
| Q8R1G6 | PDLI2_MOUSE | 0.00000 | 0.00000 | 0.00000 | 0.00000 | 0.00000 | 0.00000 | 0.05099 | 0.05532 | 0.04288 | 0.04661 | 0.04610 | 0.05560 |
| Q8R1H0 | HOP_MOUSE   | 0.00000 | 0.00000 | 0.00000 | 0.00000 | 0.00000 | 0.00000 | 0.05296 | 0.13111 | 0.07165 | 0.03848 | 0.09199 | 0.12313 |
| Q8R1I1 | QCR9_MOUSE  | 0.00000 | 0.00000 | 0.00000 | 0.00000 | 0.00000 | 0.00000 | 0.03189 | 0.04791 | 0.02874 | 0.03234 | 0.03593 | 0.03339 |
| Q8R1N4 | NUDC3_MOUSE | 0.00000 | 0.00000 | 0.00000 | 0.00000 | 0.00000 | 0.00000 | 0.00589 | 0.00327 | 0.00543 | 0.00486 | 0.00651 | 0.00357 |
| Q8R1Q8 | DC1L1_MOUSE | 0.00781 | 0.00550 | 0.00638 | 0.00818 | 0.00665 | 0.00652 | 0.00991 | 0.01184 | 0.01503 | 0.01273 | 0.01219 | 0.01124 |
| Q8R1Q9 | RBSK_MOUSE  | 0.00000 | 0.00000 | 0.00000 | 0.00000 | 0.00000 | 0.00000 | 0.00000 | 0.00886 | 0.02140 | 0.02184 | 0.02369 | 0.02339 |
| Q8R1T4 | S35A3_MOUSE | 0.00000 | 0.00000 | 0.00000 | 0.00000 | 0.00000 | 0.00000 | 0.00000 | 0.00000 | 0.00000 | 0.00000 | 0.00000 | 0.00000 |
| Q8R1V4 | TMED4_MOUSE | 0.00000 | 0.00000 | 0.00000 | 0.00000 | 0.00000 | 0.00000 | 0.00000 | 0.00518 | 0.00044 | 0.00385 | 0.00200 | 0.00469 |
| Q8R242 | DIAC_MOUSE  | 0.00000 | 0.00000 | 0.00000 | 0.00000 | 0.00000 | 0.00000 | 0.00000 | 0.00217 | 0.00230 | 0.00040 | 0.00132 | 0.00085 |
| Q8R2Q4 | RRF2M_MOUSE | 0.00706 | 0.00541 | 0.00697 | 0.01054 | 0.00731 | 0.00758 | 0.00000 | 0.00000 | 0.00000 | 0.00000 | 0.00000 | 0.00000 |



|        |             |         |         |         |         |         |         |         |         |         |         |         |         |
|--------|-------------|---------|---------|---------|---------|---------|---------|---------|---------|---------|---------|---------|---------|
| Q8R2Q8 | BST2_MOUSE  | 0.00000 | 0.00000 | 0.00000 | 0.00000 | 0.00000 | 0.00000 | 0.00000 | 0.01246 | 0.00768 | 0.00658 | 0.00452 | 0.00401 |
| Q8R2U0 | SEH1_MOUSE  | 0.00000 | 0.00000 | 0.00000 | 0.00000 | 0.00000 | 0.00000 | 0.00558 | 0.00509 | 0.00652 | 0.00569 | 0.00877 | 0.00623 |
| Q8R2U6 | NUDT4_MOUSE | 0.00000 | 0.00000 | 0.00000 | 0.00000 | 0.00000 | 0.00000 | 0.00000 | 0.00000 | 0.00000 | 0.00197 | 0.00059 | 0.00000 |
| Q8R2Y2 | MUC18_MOUSE | 0.00000 | 0.00000 | 0.00000 | 0.00000 | 0.00000 | 0.00000 | 0.04750 | 0.04230 | 0.05112 | 0.05002 | 0.05939 | 0.05002 |
| Q8R2Y8 | PTH2_MOUSE  | 0.00284 | 0.00114 | 0.00149 | 0.00170 | 0.00221 | 0.00107 | 0.01037 | 0.00527 | 0.00994 | 0.00837 | 0.01023 | 0.00731 |
| Q8R317 | UBQL1_MOUSE | 0.00000 | 0.00000 | 0.00000 | 0.00000 | 0.00000 | 0.00000 | 0.01451 | 0.01741 | 0.01717 | 0.01328 | 0.01812 | 0.01935 |
| Q8R326 | PSPC1_MOUSE | 0.00000 | 0.00000 | 0.00000 | 0.00000 | 0.00000 | 0.00000 | 0.01071 | 0.00351 | 0.00918 | 0.00804 | 0.00894 | 0.00963 |
| Q8R332 | NUP58_MOUSE | 0.00000 | 0.00000 | 0.00000 | 0.00000 | 0.00000 | 0.00000 | 0.00271 | 0.00035 | 0.00638 | 0.00640 | 0.00766 | 0.00692 |
| Q8R361 | RFIP5_MOUSE | 0.00000 | 0.00000 | 0.00000 | 0.00000 | 0.00000 | 0.00000 | 0.01587 | 0.04284 | 0.00000 | 0.00000 | 0.00000 | 0.04293 |
| Q8R3B1 | PLCD1_MOUSE | 0.00279 | 0.00283 | 0.00191 | 0.00371 | 0.00273 | 0.00398 | 0.00850 | 0.00715 | 0.01102 | 0.00672 | 0.01098 | 0.01089 |
| Q8R3D1 | TBC13_MOUSE | 0.00000 | 0.00000 | 0.00000 | 0.00000 | 0.00000 | 0.00000 | 0.00000 | 0.00000 | 0.00000 | 0.00000 | 0.00000 | 0.00000 |
| Q8R3E3 | WIPI1_MOUSE | 0.00000 | 0.00000 | 0.00000 | 0.00000 | 0.00000 | 0.00000 | 0.00000 | 0.00337 | 0.00555 | 0.00360 | 0.00196 | 0.00438 |
| Q8R3G1 | PP1R8_MOUSE | 0.00000 | 0.00000 | 0.00000 | 0.00000 | 0.00000 | 0.00000 | 0.00000 | 0.00000 | 0.00000 | 0.00098 | 0.00000 | 0.00076 |
| Q8R3G9 | TSN8_MOUSE  | 0.00000 | 0.00000 | 0.00000 | 0.00000 | 0.00000 | 0.00000 | 0.01991 | 0.03093 | 0.04529 | 0.03247 | 0.01654 | 0.03070 |
| Q8R3H7 | HS2ST_MOUSE | 0.00000 | 0.00000 | 0.00000 | 0.00000 | 0.00000 | 0.00000 | 0.00000 | 0.00061 | 0.00078 | 0.00109 | 0.00045 | 0.00034 |
| Q8R3P0 | ACY2_MOUSE  | 0.00000 | 0.00000 | 0.00000 | 0.00000 | 0.00000 | 0.00000 | 0.00029 | 0.00000 | 0.00000 | 0.00022 | 0.00014 | 0.00000 |
| Q8R3S6 | EXOC1_MOUSE | 0.00000 | 0.00000 | 0.00000 | 0.00000 | 0.00000 | 0.00000 | 0.00270 | 0.00000 | 0.00315 | 0.00196 | 0.00000 | 0.00400 |
| Q8R3T5 | STXB6_MOUSE | 0.00000 | 0.00000 | 0.00000 | 0.00000 | 0.00000 | 0.00000 | 0.00000 | 0.00135 | 0.00032 | 0.00039 | 0.00000 | 0.00060 |
| Q8R404 | MIC13_MOUSE | 0.00000 | 0.00000 | 0.00000 | 0.00000 | 0.00000 | 0.00000 | 0.00261 | 0.02536 | 0.01340 | 0.00651 | 0.01087 | 0.02406 |
| Q8R411 | MYCT1_MOUSE | 0.00000 | 0.00000 | 0.00000 | 0.00000 | 0.00000 | 0.00000 | 0.00000 | 0.00326 | 0.00000 | 0.00000 | 0.00000 | 0.00000 |
| Q8R420 | ABCA3_MOUSE | 0.00000 | 0.00000 | 0.00000 | 0.00000 | 0.00000 | 0.00000 | 0.00437 | 0.00860 | 0.00619 | 0.00682 | 0.00222 | 0.00401 |
| Q8R429 | AT2A1_MOUSE | 0.00000 | 0.00000 | 0.00000 | 0.00000 | 0.00000 | 0.00000 | 0.05181 | 0.00284 | 0.00048 | 0.00081 | 0.00000 | 0.00017 |
| Q8R4E4 | MYOZ3_MOUSE | 0.00000 | 0.00000 | 0.00000 | 0.00000 | 0.00000 | 0.00000 | 0.00335 | 0.00000 | 0.00000 | 0.00000 | 0.00000 | 0.00000 |
| Q8R4H2 | ARHGC_MOUSE | 0.00000 | 0.00000 | 0.00000 | 0.00000 | 0.00000 | 0.00000 | 0.00624 | 0.00759 | 0.00960 | 0.00786 | 0.00850 | 0.00757 |
| Q8R4K2 | IRAK4_MOUSE | 0.00000 | 0.00000 | 0.00000 | 0.00000 | 0.00000 | 0.00000 | 0.00884 | 0.00000 | 0.00764 | 0.00427 | 0.00315 | 0.00126 |
| Q8R4N0 | CLYBL_MOUSE | 0.00865 | 0.01173 | 0.01509 | 0.01509 | 0.01681 | 0.00913 | 0.00000 | 0.00000 | 0.00000 | 0.00111 | 0.00000 | 0.00000 |
| Q8R4S0 | PP14C_MOUSE | 0.00078 | 0.00078 | 0.00035 | 0.00050 | 0.00050 | 0.00000 | 0.00000 | 0.00000 | 0.00165 | 0.00149 | 0.00102 | 0.00000 |
| Q8R4Y4 | STAB1_MOUSE | 0.00000 | 0.00000 | 0.00000 | 0.00000 | 0.00000 | 0.00000 | 0.00000 | 0.00085 | 0.00181 | 0.00066 | 0.00073 | 0.00044 |
| Q8R502 | LRC8C_MOUSE | 0.00000 | 0.00000 | 0.00000 | 0.00000 | 0.00000 | 0.00000 | 0.00780 | 0.01867 | 0.01415 | 0.01132 | 0.00811 | 0.01092 |
| Q8R519 | ACMSD_MOUSE | 0.00000 | 0.00000 | 0.00000 | 0.00000 | 0.00000 | 0.00000 | 0.00009 | 0.00010 | 0.00075 | 0.00032 | 0.00064 | 0.00053 |
| Q8R550 | SH3K1_MOUSE | 0.00000 | 0.00000 | 0.00000 | 0.00000 | 0.00000 | 0.00000 | 0.00370 | 0.00275 | 0.00551 | 0.00755 | 0.00490 | 0.00810 |
| Q8R570 | SNP47_MOUSE | 0.00000 | 0.00000 | 0.00000 | 0.00000 | 0.00000 | 0.00000 | 0.00215 | 0.00122 | 0.00197 | 0.00275 | 0.00112 | 0.00291 |
| Q8R574 | KPRB_MOUSE  | 0.00000 | 0.00000 | 0.00000 | 0.00000 | 0.00000 | 0.00000 | 0.00760 | 0.00305 | 0.00776 | 0.00576 | 0.00612 | 0.00910 |
| Q8R5A3 | AB1IP_MOUSE | 0.00000 | 0.00000 | 0.00000 | 0.00000 | 0.00000 | 0.00000 | 0.00138 | 0.00224 | 0.00429 | 0.00501 | 0.00291 | 0.00456 |

|        |             |         |         |         |         |         |         |         |         |         |         |         |         |
|--------|-------------|---------|---------|---------|---------|---------|---------|---------|---------|---------|---------|---------|---------|
| Q8R5C5 | ACTY_MOUSE  | 0.00000 | 0.00000 | 0.00000 | 0.00000 | 0.00000 | 0.00000 | 0.01679 | 0.02045 | 0.01441 | 0.01026 | 0.01894 | 0.01385 |
| Q8R5G7 | ARAP3_MOUSE | 0.00000 | 0.00000 | 0.00000 | 0.00000 | 0.00000 | 0.00000 | 0.00000 | 0.00310 | 0.00427 | 0.00413 | 0.00595 | 0.00454 |
| Q8R5H1 | UBP15_MOUSE | 0.00795 | 0.00093 | 0.00246 | 0.00392 | 0.00149 | 0.00151 | 0.00390 | 0.00321 | 0.00395 | 0.00327 | 0.00422 | 0.00359 |
| Q8R5I6 | GSTM4_MOUSE | 0.00112 | 0.00103 | 0.00109 | 0.00167 | 0.00188 | 0.00059 | 0.00110 | 0.00365 | 0.00000 | 0.00200 | 0.00000 | 0.00322 |
| Q8R5J9 | PRAF3_MOUSE | 0.00000 | 0.00000 | 0.00000 | 0.00000 | 0.00000 | 0.00000 | 0.02272 | 0.03429 | 0.00807 | 0.01361 | 0.00421 | 0.02162 |
| Q8R5M0 | GIPC3_MOUSE | 0.00000 | 0.00000 | 0.00000 | 0.00000 | 0.00000 | 0.00000 | 0.00000 | 0.00000 | 0.00120 | 0.00063 | 0.00096 | 0.00000 |
| Q8R5M8 | CADM1_MOUSE | 0.00000 | 0.00000 | 0.00000 | 0.00000 | 0.00000 | 0.00000 | 0.01304 | 0.01600 | 0.01453 | 0.01813 | 0.01657 | 0.02473 |
| Q8VBT0 | TMX1_MOUSE  | 0.00000 | 0.00000 | 0.00000 | 0.00000 | 0.00000 | 0.00000 | 0.01751 | 0.00779 | 0.00485 | 0.00483 | 0.00872 | 0.00501 |
| Q8VBT9 | ASPC1_MOUSE | 0.00000 | 0.00000 | 0.00000 | 0.00000 | 0.00000 | 0.00000 | 0.00094 | 0.00096 | 0.00080 | 0.00179 | 0.00128 | 0.00186 |
| Q8VBV7 | CSN8_MOUSE  | 0.00000 | 0.00000 | 0.00000 | 0.00000 | 0.00000 | 0.00000 | 0.01691 | 0.01205 | 0.01196 | 0.01742 | 0.01835 | 0.01829 |
| Q8VBW6 | ULA1_MOUSE  | 0.00528 | 0.00924 | 0.00599 | 0.00628 | 0.00496 | 0.00417 | 0.00699 | 0.00804 | 0.01344 | 0.01210 | 0.01560 | 0.01213 |
| Q8VBZ3 | CLPT1_MOUSE | 0.01048 | 0.01745 | 0.02024 | 0.00491 | 0.01126 | 0.00302 | 0.01095 | 0.00943 | 0.01295 | 0.01053 | 0.02034 | 0.01340 |
| Q8VC12 | HUTU_MOUSE  | 0.00000 | 0.00000 | 0.00000 | 0.00000 | 0.00000 | 0.00000 | 0.01583 | 0.01068 | 0.01653 | 0.01421 | 0.01624 | 0.01477 |
| Q8VC28 | AK1CD_MOUSE | 0.00000 | 0.00000 | 0.00000 | 0.00000 | 0.00000 | 0.00000 | 0.00000 | 0.00090 | 0.00318 | 0.00151 | 0.00152 | 0.00146 |
| Q8VC30 | TKFC_MOUSE  | 0.00000 | 0.00000 | 0.00000 | 0.00000 | 0.00000 | 0.00000 | 0.00002 | 0.00012 | 0.00038 | 0.00029 | 0.00011 | 0.00006 |
| Q8VC60 | GLB1L_MOUSE | 0.00000 | 0.00000 | 0.00000 | 0.00000 | 0.00000 | 0.00000 | 0.00000 | 0.00000 | 0.00198 | 0.00000 | 0.00112 | 0.00000 |
| Q8VC69 | S22A6_MOUSE | 0.00000 | 0.00000 | 0.00000 | 0.00000 | 0.00000 | 0.00000 | 0.00000 | 0.00000 | 0.00000 | 0.00000 | 0.00000 | 0.00000 |
| Q8VCA8 | SCRN2_MOUSE | 0.00109 | 0.00246 | 0.00072 | 0.00109 | 0.00119 | 0.00149 | 0.00423 | 0.00246 | 0.00643 | 0.00578 | 0.00788 | 0.00601 |
| Q8VCC1 | PGDH_MOUSE  | 0.00000 | 0.00000 | 0.00000 | 0.00000 | 0.00000 | 0.00000 | 0.01401 | 0.02607 | 0.01605 | 0.01465 | 0.01303 | 0.01689 |
| Q8VCC2 | EST1_MOUSE  | 0.00000 | 0.00000 | 0.00000 | 0.00000 | 0.00000 | 0.00000 | 0.00000 | 0.00252 | 0.00184 | 0.00271 | 0.00302 | 0.00206 |
| Q8VCC9 | SPON1_MOUSE | 0.00000 | 0.00000 | 0.00000 | 0.00000 | 0.00000 | 0.00000 | 0.00631 | 0.01099 | 0.01010 | 0.00709 | 0.00843 | 0.00997 |
| Q8VCE2 | GPN1_MOUSE  | 0.00000 | 0.00000 | 0.00000 | 0.00000 | 0.00000 | 0.00000 | 0.00000 | 0.00195 | 0.00000 | 0.00000 | 0.00000 | 0.00000 |
| Q8VCF0 | MAVS_MOUSE  | 0.00656 | 0.00505 | 0.00643 | 0.00676 | 0.00697 | 0.00561 | 0.01213 | 0.00253 | 0.00598 | 0.00402 | 0.00305 | 0.00202 |
| Q8VCH0 | THIKB_MOUSE | 0.00000 | 0.00000 | 0.00000 | 0.00000 | 0.00000 | 0.00000 | 0.00000 | 0.00000 | 0.00000 | 0.00000 | 0.00000 | 0.00000 |
| Q8VCH7 | RDH10_MOUSE | 0.00000 | 0.00000 | 0.00000 | 0.00000 | 0.00000 | 0.00000 | 0.00000 | 0.00038 | 0.00063 | 0.00052 | 0.00042 | 0.00080 |
| Q8VCH8 | UBXN4_MOUSE | 0.00000 | 0.00000 | 0.00000 | 0.00000 | 0.00000 | 0.00000 | 0.00689 | 0.00463 | 0.00262 | 0.00369 | 0.00240 | 0.00211 |
| Q8VCI0 | PLBL1_MOUSE | 0.00000 | 0.00000 | 0.00000 | 0.00000 | 0.00000 | 0.00000 | 0.00490 | 0.00478 | 0.00626 | 0.00610 | 0.00687 | 0.00737 |
| Q8VCI5 | PEX19_MOUSE | 0.00993 | 0.00705 | 0.00770 | 0.00493 | 0.01015 | 0.00391 | 0.00000 | 0.00267 | 0.00194 | 0.00178 | 0.00337 | 0.00117 |
| Q8VCM7 | FIBG_MOUSE  | 0.01340 | 0.00867 | 0.00962 | 0.02513 | 0.01564 | 0.01223 | 0.09917 | 0.03407 | 0.04354 | 0.05986 | 0.09736 | 0.02647 |
| Q8VCM8 | NCLN_MOUSE  | 0.00000 | 0.00000 | 0.00000 | 0.00000 | 0.00000 | 0.00000 | 0.00552 | 0.00351 | 0.00573 | 0.00508 | 0.00487 | 0.00451 |
| Q8VCN5 | CGL_MOUSE   | 0.00000 | 0.00000 | 0.00000 | 0.00000 | 0.00000 | 0.00000 | 0.00051 | 0.00000 | 0.00195 | 0.00064 | 0.00116 | 0.00059 |
| Q8VCN6 | CD99_MOUSE  | 0.00000 | 0.00000 | 0.00000 | 0.00000 | 0.00000 | 0.00000 | 0.00607 | 0.00000 | 0.01818 | 0.00611 | 0.01627 | 0.00516 |
| Q8VCN9 | TBCC_MOUSE  | 0.00000 | 0.00000 | 0.00000 | 0.00000 | 0.00000 | 0.00000 | 0.00079 | 0.00166 | 0.00190 | 0.00165 | 0.00211 | 0.00248 |
| Q8VCP9 | CLC14_MOUSE | 0.00000 | 0.00000 | 0.00000 | 0.00000 | 0.00000 | 0.00000 | 0.01160 | 0.02348 | 0.03128 | 0.02385 | 0.03945 | 0.02519 |

|        |             |         |         |         |         |         |         |         |         |         |         |         |         |
|--------|-------------|---------|---------|---------|---------|---------|---------|---------|---------|---------|---------|---------|---------|
| Q8VCR7 | ABHEB_MOUSE | 0.00000 | 0.00000 | 0.00000 | 0.00000 | 0.00000 | 0.00000 | 0.00826 | 0.01194 | 0.01072 | 0.00869 | 0.01366 | 0.00973 |
| Q8VCT3 | AMPB_MOUSE  | 0.00212 | 0.00394 | 0.00256 | 0.00223 | 0.00298 | 0.00382 | 0.02020 | 0.02904 | 0.03042 | 0.02753 | 0.02269 | 0.02342 |
| Q8VCT4 | EST1D_MOUSE | 0.00246 | 0.00385 | 0.00507 | 0.00333 | 0.00494 | 0.00249 | 0.18808 | 0.29539 | 0.15218 | 0.17731 | 0.16579 | 0.23362 |
| Q8VCV1 | AB17C_MOUSE | 0.00000 | 0.00000 | 0.00000 | 0.00000 | 0.00000 | 0.00000 | 0.00000 | 0.00079 | 0.00104 | 0.00045 | 0.00000 | 0.00000 |
| Q8VCW8 | ACSF2_MOUSE | 0.03210 | 0.03060 | 0.01817 | 0.01451 | 0.02769 | 0.02305 | 0.01057 | 0.01627 | 0.01180 | 0.01321 | 0.01842 | 0.01890 |
| Q8VD04 | GRAP1_MOUSE | 0.00000 | 0.00000 | 0.00000 | 0.00000 | 0.00000 | 0.00000 | 0.00000 | 0.00000 | 0.00000 | 0.00000 | 0.00000 | 0.00000 |
| Q8VD75 | HIP1_MOUSE  | 0.00000 | 0.00000 | 0.00000 | 0.00000 | 0.00000 | 0.00000 | 0.00553 | 0.00616 | 0.01054 | 0.00749 | 0.01154 | 0.00894 |
| Q8VDC0 | SYLM_MOUSE  | 0.00000 | 0.00000 | 0.00000 | 0.00000 | 0.00000 | 0.00000 | 0.00000 | 0.00000 | 0.00000 | 0.00000 | 0.00000 | 0.00000 |
| Q8VDC1 | FYCO1_MOUSE | 0.00514 | 0.00722 | 0.00565 | 0.00426 | 0.00513 | 0.00382 | 0.00183 | 0.00238 | 0.00629 | 0.00417 | 0.00452 | 0.00462 |
| Q8VDD5 | MYH9_MOUSE  | 0.05910 | 0.05741 | 0.04268 | 0.05140 | 0.05735 | 0.05030 | 0.23677 | 0.21928 | 0.24273 | 0.25988 | 0.21960 | 0.24585 |
| Q8VDF3 | DAPK2_MOUSE | 0.00000 | 0.00000 | 0.00000 | 0.00000 | 0.00000 | 0.00000 | 0.00446 | 0.00175 | 0.00492 | 0.00483 | 0.00659 | 0.00466 |
| Q8VDG5 | PPCS_MOUSE  | 0.00000 | 0.00000 | 0.00000 | 0.00000 | 0.00000 | 0.00000 | 0.00000 | 0.00246 | 0.00291 | 0.00208 | 0.00000 | 0.00174 |
| Q8VDJ3 | VIGLN_MOUSE | 0.00658 | 0.00560 | 0.00618 | 0.00616 | 0.00515 | 0.00541 | 0.02438 | 0.02628 | 0.02878 | 0.02524 | 0.02728 | 0.02836 |
| Q8VDK1 | NIT1_MOUSE  | 0.00201 | 0.00188 | 0.00304 | 0.00186 | 0.00333 | 0.00249 | 0.00964 | 0.00862 | 0.01351 | 0.01030 | 0.01078 | 0.01021 |
| Q8VDL4 | ADPGK_MOUSE | 0.00000 | 0.00000 | 0.00000 | 0.00000 | 0.00000 | 0.00000 | 0.00913 | 0.01332 | 0.01223 | 0.01054 | 0.01571 | 0.01364 |
| Q8VDM4 | PSMD2_MOUSE | 0.00217 | 0.00323 | 0.00357 | 0.00545 | 0.00247 | 0.00206 | 0.03549 | 0.04663 | 0.06318 | 0.05436 | 0.05662 | 0.05307 |
| Q8VDM6 | HNRL1_MOUSE | 0.00000 | 0.00000 | 0.00000 | 0.00000 | 0.00000 | 0.00000 | 0.01875 | 0.02431 | 0.03009 | 0.02284 | 0.00680 | 0.03208 |
| Q8VDN2 | AT1A1_MOUSE | 0.15344 | 0.18349 | 0.11755 | 0.11996 | 0.15091 | 0.18714 | 0.05956 | 0.07276 | 0.05669 | 0.06356 | 0.05128 | 0.06934 |
| Q8VDP3 | MICA1_MOUSE | 0.00000 | 0.00000 | 0.00000 | 0.00000 | 0.00000 | 0.00000 | 0.00635 | 0.00343 | 0.00818 | 0.00444 | 0.00575 | 0.00460 |
| Q8VDP4 | CCAR2_MOUSE | 0.00000 | 0.00000 | 0.00000 | 0.00000 | 0.00000 | 0.00000 | 0.01023 | 0.00432 | 0.01007 | 0.00683 | 0.00466 | 0.00899 |
| Q8VDP6 | CDIPT_MOUSE | 0.00000 | 0.00000 | 0.00000 | 0.00000 | 0.00000 | 0.00000 | 0.00409 | 0.01246 | 0.00531 | 0.00546 | 0.00000 | 0.00542 |
| Q8VDQ1 | PTGR2_MOUSE | 0.02224 | 0.00749 | 0.01585 | 0.01134 | 0.01609 | 0.01052 | 0.01068 | 0.01098 | 0.01527 | 0.00917 | 0.01316 | 0.01036 |
| Q8VDQ8 | SIR2_MOUSE  | 0.00000 | 0.00000 | 0.00000 | 0.00000 | 0.00000 | 0.00000 | 0.00701 | 0.00675 | 0.00771 | 0.00822 | 0.00475 | 0.00823 |
| Q8VDR5 | TM267_MOUSE | 0.00000 | 0.00000 | 0.00000 | 0.00000 | 0.00000 | 0.00000 | 0.00139 | 0.00000 | 0.00269 | 0.00000 | 0.00000 | 0.00000 |
| Q8VDR9 | DOCK6_MOUSE | 0.00000 | 0.00000 | 0.00000 | 0.00000 | 0.00000 | 0.00000 | 0.00110 | 0.00000 | 0.00178 | 0.00148 | 0.00067 | 0.00113 |
| Q8VDT1 | SC5A9_MOUSE | 0.00000 | 0.00000 | 0.00000 | 0.00000 | 0.00000 | 0.00000 | 0.00000 | 0.00000 | 0.00000 | 0.00000 | 0.00000 | 0.00000 |
| Q8VDW0 | DX39A_MOUSE | 0.00000 | 0.00000 | 0.00000 | 0.00000 | 0.00000 | 0.00000 | 0.00000 | 0.00157 | 0.00049 | 0.00064 | 0.00225 | 0.00195 |
| Q8VE22 | RT23_MOUSE  | 0.00296 | 0.00276 | 0.00371 | 0.00290 | 0.00230 | 0.00269 | 0.00000 | 0.00000 | 0.00000 | 0.00000 | 0.00000 | 0.00000 |
| Q8VE37 | RCC1_MOUSE  | 0.00000 | 0.00000 | 0.00000 | 0.00000 | 0.00000 | 0.00000 | 0.00825 | 0.00455 | 0.00508 | 0.00460 | 0.00405 | 0.00500 |
| Q8VE38 | OXND1_MOUSE | 0.00190 | 0.00445 | 0.00590 | 0.00542 | 0.00803 | 0.00585 | 0.00000 | 0.00000 | 0.00086 | 0.00000 | 0.00000 | 0.00035 |
| Q8VE47 | UBA5_MOUSE  | 0.00000 | 0.00000 | 0.00000 | 0.00000 | 0.00000 | 0.00000 | 0.00683 | 0.01146 | 0.01077 | 0.01163 | 0.01733 | 0.01226 |
| Q8VE62 | PAIP1_MOUSE | 0.00000 | 0.00000 | 0.00000 | 0.00000 | 0.00000 | 0.00000 | 0.00000 | 0.00512 | 0.00227 | 0.00348 | 0.00152 | 0.00358 |
| Q8VE70 | PDC10_MOUSE | 0.00000 | 0.00000 | 0.00000 | 0.00000 | 0.00000 | 0.00000 | 0.00811 | 0.00518 | 0.01032 | 0.01214 | 0.01008 | 0.01302 |
| Q8VE88 | F1142_MOUSE | 0.00000 | 0.00000 | 0.00000 | 0.00000 | 0.00000 | 0.00000 | 0.00282 | 0.00225 | 0.00298 | 0.00262 | 0.00366 | 0.00323 |

|        |             |         |         |         |         |         |         |         |         |         |         |         |         |
|--------|-------------|---------|---------|---------|---------|---------|---------|---------|---------|---------|---------|---------|---------|
| Q8VE95 | CH082_MOUSE | 0.00000 | 0.00000 | 0.00000 | 0.00000 | 0.00000 | 0.00000 | 0.00122 | 0.00067 | 0.00248 | 0.00187 | 0.01124 | 0.00229 |
| Q8VE97 | SRSF4_MOUSE | 0.00000 | 0.00000 | 0.00000 | 0.00000 | 0.00000 | 0.00000 | 0.00167 | 0.00228 | 0.00536 | 0.00437 | 0.00281 | 0.00200 |
| Q8VEB1 | GRK5_MOUSE  | 0.00000 | 0.00000 | 0.00000 | 0.00000 | 0.00000 | 0.00000 | 0.00157 | 0.00131 | 0.00000 | 0.00000 | 0.00359 | 0.00000 |
| Q8VEB4 | PAG15_MOUSE | 0.00000 | 0.00000 | 0.00000 | 0.00000 | 0.00000 | 0.00000 | 0.00225 | 0.00683 | 0.00373 | 0.00379 | 0.00266 | 0.00232 |
| Q8VED9 | LEGL_MOUSE  | 0.00000 | 0.00000 | 0.00000 | 0.00000 | 0.00000 | 0.00000 | 0.00172 | 0.00322 | 0.00515 | 0.00243 | 0.00281 | 0.00288 |
| Q8VEE1 | LMCD1_MOUSE | 0.00000 | 0.00000 | 0.00000 | 0.00000 | 0.00000 | 0.00000 | 0.00801 | 0.00776 | 0.00195 | 0.00705 | 0.00000 | 0.00364 |
| Q8VEE4 | RFA1_MOUSE  | 0.00000 | 0.00000 | 0.00000 | 0.00000 | 0.00000 | 0.00000 | 0.00342 | 0.00000 | 0.00205 | 0.00366 | 0.00000 | 0.00684 |
| Q8VEH3 | ARL8A_MOUSE | 0.00000 | 0.00000 | 0.00000 | 0.00000 | 0.00000 | 0.00000 | 0.02374 | 0.01421 | 0.01389 | 0.01491 | 0.01727 | 0.00951 |
| Q8VEK0 | CC50A_MOUSE | 0.00000 | 0.00000 | 0.00000 | 0.00000 | 0.00000 | 0.00000 | 0.00000 | 0.00623 | 0.00604 | 0.00681 | 0.00295 | 0.00405 |
| Q8VEK3 | HNRPU_MOUSE | 0.00000 | 0.00000 | 0.00000 | 0.00000 | 0.00000 | 0.00000 | 0.06054 | 0.08080 | 0.06741 | 0.07380 | 0.04695 | 0.08350 |
| Q8VEM8 | MPCP_MOUSE  | 0.16449 | 0.25013 | 0.30286 | 0.21600 | 0.18786 | 0.21665 | 0.11739 | 0.11493 | 0.12931 | 0.12409 | 0.11802 | 0.11289 |
| Q8VH51 | RBM39_MOUSE | 0.00000 | 0.00000 | 0.00000 | 0.00000 | 0.00000 | 0.00000 | 0.01488 | 0.01489 | 0.01139 | 0.01351 | 0.01392 | 0.01554 |
| Q8VHE0 | SEC63_MOUSE | 0.00000 | 0.00000 | 0.00000 | 0.00000 | 0.00000 | 0.00000 | 0.00000 | 0.00305 | 0.00141 | 0.00074 | 0.00268 | 0.00057 |
| Q8VHG0 | FMO4_MOUSE  | 0.00000 | 0.00000 | 0.00000 | 0.00000 | 0.00000 | 0.00000 | 0.00000 | 0.00000 | 0.00000 | 0.00000 | 0.00000 | 0.00022 |
| Q8VHK1 | CSK12_MOUSE | 0.00000 | 0.00000 | 0.00000 | 0.00000 | 0.00000 | 0.00000 | 0.00000 | 0.00098 | 0.00261 | 0.00134 | 0.00000 | 0.00133 |
| Q8VHL1 | SETD7_MOUSE | 0.00000 | 0.00000 | 0.00000 | 0.00000 | 0.00000 | 0.00000 | 0.00331 | 0.00464 | 0.00621 | 0.00541 | 0.00493 | 0.00722 |
| Q8VHR5 | P66B_MOUSE  | 0.00000 | 0.00000 | 0.00000 | 0.00000 | 0.00000 | 0.00000 | 0.00000 | 0.00000 | 0.00706 | 0.00632 | 0.00321 | 0.00301 |
| Q8VHX6 | FLNC_MOUSE  | 0.09825 | 0.10894 | 0.11036 | 0.08097 | 0.08557 | 0.06241 | 0.10820 | 0.01390 | 0.01362 | 0.01238 | 0.01034 | 0.00749 |
| Q8VHY0 | CSPG4_MOUSE | 0.00000 | 0.00000 | 0.00000 | 0.00000 | 0.00000 | 0.00000 | 0.00972 | 0.00667 | 0.02008 | 0.00765 | 0.02224 | 0.01272 |
| Q8VI36 | PAXI_MOUSE  | 0.00000 | 0.00000 | 0.00000 | 0.00000 | 0.00000 | 0.00000 | 0.01990 | 0.02442 | 0.02842 | 0.02021 | 0.02012 | 0.02571 |
| Q8VI47 | MRP2_MOUSE  | 0.00000 | 0.00000 | 0.00000 | 0.00000 | 0.00000 | 0.00000 | 0.00000 | 0.00000 | 0.00000 | 0.00000 | 0.00000 | 0.00042 |
| Q8VIJ6 | SFPQ_MOUSE  | 0.00322 | 0.00447 | 0.00217 | 0.00233 | 0.00306 | 0.00309 | 0.08487 | 0.04160 | 0.06876 | 0.05464 | 0.09109 | 0.06658 |
| Q8VIM4 | BSND_MOUSE  | 0.00000 | 0.00000 | 0.00000 | 0.00000 | 0.00000 | 0.00000 | 0.00000 | 0.00000 | 0.00000 | 0.00000 | 0.00000 | 0.00000 |
| Q8WTY4 | CPIN1_MOUSE | 0.00000 | 0.00000 | 0.00056 | 0.00018 | 0.00007 | 0.00000 | 0.00000 | 0.00000 | 0.00113 | 0.00177 | 0.00080 | 0.00075 |
| Q91V01 | MBOA5_MOUSE | 0.00000 | 0.00000 | 0.00000 | 0.00000 | 0.00000 | 0.00000 | 0.00996 | 0.00829 | 0.00624 | 0.00785 | 0.00265 | 0.00621 |
| Q91V04 | TRAM1_MOUSE | 0.00000 | 0.00000 | 0.00000 | 0.00000 | 0.00000 | 0.00000 | 0.00330 | 0.00420 | 0.00026 | 0.00111 | 0.00000 | 0.00261 |
| Q91V12 | BACH_MOUSE  | 0.00000 | 0.00000 | 0.00000 | 0.00000 | 0.00000 | 0.00000 | 0.02897 | 0.03584 | 0.03645 | 0.04043 | 0.03210 | 0.03595 |
| Q91V16 | ETFR1_MOUSE | 0.00000 | 0.00000 | 0.00000 | 0.00000 | 0.00000 | 0.00000 | 0.00086 | 0.00000 | 0.00000 | 0.00000 | 0.00000 | 0.00029 |
| Q91V41 | RAB14_MOUSE | 0.01923 | 0.01742 | 0.01627 | 0.01419 | 0.02657 | 0.01867 | 0.03262 | 0.03605 | 0.03715 | 0.03630 | 0.02215 | 0.04446 |
| Q91V61 | SFXN3_MOUSE | 0.00208 | 0.00362 | 0.00079 | 0.00093 | 0.00139 | 0.00150 | 0.02200 | 0.02508 | 0.02513 | 0.02803 | 0.02140 | 0.03067 |
| Q91V64 | ISOC1_MOUSE | 0.00387 | 0.00332 | 0.00413 | 0.00262 | 0.00297 | 0.00311 | 0.00535 | 0.01089 | 0.01642 | 0.01524 | 0.01411 | 0.01455 |
| Q91V76 | CK054_MOUSE | 0.00000 | 0.00000 | 0.00000 | 0.00000 | 0.00000 | 0.00000 | 0.00007 | 0.00013 | 0.00013 | 0.00007 | 0.00023 | 0.00014 |
| Q91V88 | NPNT_MOUSE  | 0.00000 | 0.00000 | 0.00000 | 0.00000 | 0.00000 | 0.00000 | 0.11516 | 0.09540 | 0.13217 | 0.08089 | 0.17160 | 0.15243 |
| Q91V92 | ACLY_MOUSE  | 0.00000 | 0.00000 | 0.00000 | 0.00000 | 0.00000 | 0.00000 | 0.07777 | 0.04418 | 0.06914 | 0.04277 | 0.04577 | 0.04877 |

|        |             |         |         |         |         |         |         |         |         |         |         |         |         |
|--------|-------------|---------|---------|---------|---------|---------|---------|---------|---------|---------|---------|---------|---------|
| Q91VA0 | ACSM1_MOUSE | 0.00000 | 0.00000 | 0.00000 | 0.00000 | 0.00000 | 0.00000 | 0.00001 | 0.00000 | 0.00000 | 0.00000 | 0.00032 | 0.00005 |
| Q91VA6 | PDIP2_MOUSE | 0.00138 | 0.00054 | 0.00095 | 0.00044 | 0.00087 | 0.00055 | 0.00008 | 0.00007 | 0.00006 | 0.00007 | 0.00000 | 0.00000 |
| Q91VC3 | IF4A3_MOUSE | 0.00000 | 0.00000 | 0.00000 | 0.00000 | 0.00000 | 0.00000 | 0.04240 | 0.01218 | 0.02225 | 0.01417 | 0.01006 | 0.01270 |
| Q91VC4 | PLVAP_MOUSE | 0.00000 | 0.00000 | 0.00000 | 0.00000 | 0.00000 | 0.00000 | 0.05812 | 0.05485 | 0.03932 | 0.03993 | 0.03809 | 0.05386 |
| Q91VC7 | PP14A_MOUSE | 0.00000 | 0.00000 | 0.00000 | 0.00000 | 0.00000 | 0.00000 | 0.03226 | 0.07808 | 0.03647 | 0.05390 | 0.04390 | 0.04516 |
| Q91VD9 | NDUS1_MOUSE | 0.52576 | 0.48272 | 0.42574 | 0.41013 | 0.47567 | 0.61510 | 0.04336 | 0.02476 | 0.03741 | 0.03167 | 0.03560 | 0.03150 |
| Q91VE0 | S27A4_MOUSE | 0.00000 | 0.00000 | 0.00000 | 0.00000 | 0.00000 | 0.00000 | 0.00033 | 0.00000 | 0.00061 | 0.00061 | 0.00115 | 0.00056 |
| Q91VF5 | EMID1_MOUSE | 0.00000 | 0.00000 | 0.00000 | 0.00000 | 0.00000 | 0.00000 | 0.00000 | 0.00051 | 0.00199 | 0.00042 | 0.00106 | 0.00000 |
| Q91VH2 | SNX9_MOUSE  | 0.00000 | 0.00000 | 0.00000 | 0.00000 | 0.00000 | 0.00000 | 0.00791 | 0.00923 | 0.01386 | 0.01167 | 0.00973 | 0.01141 |
| Q91VH6 | MEMO1_MOUSE | 0.00108 | 0.00161 | 0.00144 | 0.00160 | 0.00158 | 0.00129 | 0.00219 | 0.00415 | 0.00533 | 0.00625 | 0.00267 | 0.00367 |
| Q91VI7 | RINI_MOUSE  | 0.02659 | 0.02349 | 0.01872 | 0.01649 | 0.01376 | 0.02748 | 0.02589 | 0.02941 | 0.04024 | 0.03746 | 0.04165 | 0.03136 |
| Q91VJ2 | CAVN3_MOUSE | 0.00000 | 0.00000 | 0.00000 | 0.00000 | 0.00000 | 0.00000 | 0.00266 | 0.01173 | 0.00444 | 0.00452 | 0.00717 | 0.00464 |
| Q91VJ4 | STK38_MOUSE | 0.00000 | 0.00000 | 0.00000 | 0.00000 | 0.00000 | 0.00000 | 0.00683 | 0.00713 | 0.00687 | 0.00548 | 0.00760 | 0.00702 |
| Q91VK1 | BZW2_MOUSE  | 0.00000 | 0.00000 | 0.00000 | 0.00000 | 0.00000 | 0.00000 | 0.00146 | 0.00000 | 0.00000 | 0.00000 | 0.00000 | 0.00074 |
| Q91VM5 | RMXL1_MOUSE | 0.00000 | 0.00000 | 0.00000 | 0.00000 | 0.00000 | 0.00000 | 0.01040 | 0.01382 | 0.02305 | 0.01809 | 0.01530 | 0.01341 |
| Q91VM9 | IPYR2_MOUSE | 0.04070 | 0.04090 | 0.02889 | 0.03399 | 0.03463 | 0.03734 | 0.02371 | 0.02879 | 0.02792 | 0.02082 | 0.02267 | 0.02501 |
| Q91VN4 | MIC25_MOUSE | 0.00119 | 0.00411 | 0.00274 | 0.00174 | 0.00139 | 0.00234 | 0.02146 | 0.00389 | 0.00325 | 0.00282 | 0.00901 | 0.00366 |
| Q91VR2 | ATPG_MOUSE  | 0.04172 | 0.00222 | 0.06988 | 0.10618 | 0.02938 | 0.02729 | 0.04589 | 0.06051 | 0.04540 | 0.05574 | 0.04288 | 0.04898 |
| Q91VR5 | DDX1_MOUSE  | 0.00478 | 0.01229 | 0.00159 | 0.00089 | 0.00066 | 0.00128 | 0.01130 | 0.00831 | 0.01156 | 0.00816 | 0.01041 | 0.00925 |
| Q91VS7 | MGST1_MOUSE | 0.00000 | 0.00000 | 0.00000 | 0.00000 | 0.00000 | 0.00000 | 0.00194 | 0.01495 | 0.00208 | 0.00811 | 0.01407 | 0.01453 |
| Q91VT4 | CBR4_MOUSE  | 0.00853 | 0.01228 | 0.01356 | 0.01290 | 0.00941 | 0.01314 | 0.00104 | 0.00321 | 0.00412 | 0.00252 | 0.00221 | 0.00153 |
| Q91VW3 | SH3L3_MOUSE | 0.00000 | 0.00000 | 0.00000 | 0.00000 | 0.00000 | 0.00000 | 0.02104 | 0.02568 | 0.02272 | 0.02393 | 0.01983 | 0.02887 |
| Q91VZ6 | SMAP1_MOUSE | 0.00000 | 0.00000 | 0.00000 | 0.00000 | 0.00000 | 0.00000 | 0.00968 | 0.00582 | 0.00311 | 0.00310 | 0.00125 | 0.00444 |
| Q91W10 | S39A8_MOUSE | 0.00000 | 0.00000 | 0.00000 | 0.00000 | 0.00000 | 0.00000 | 0.00000 | 0.00000 | 0.00102 | 0.00000 | 0.00000 | 0.00000 |
| Q91W43 | GCSP_MOUSE  | 0.00000 | 0.00000 | 0.00000 | 0.00000 | 0.00000 | 0.00000 | 0.00000 | 0.00000 | 0.00000 | 0.00000 | 0.00000 | 0.00000 |
| Q91W50 | CSDE1_MOUSE | 0.00000 | 0.00000 | 0.00000 | 0.00000 | 0.00000 | 0.00000 | 0.01220 | 0.01075 | 0.00943 | 0.01173 | 0.00816 | 0.01062 |
| Q91W53 | GOGA7_MOUSE | 0.00000 | 0.00000 | 0.00000 | 0.00000 | 0.00000 | 0.00000 | 0.00089 | 0.00077 | 0.00256 | 0.00126 | 0.00128 | 0.00112 |
| Q91W89 | MA2C1_MOUSE | 0.00058 | 0.00005 | 0.00135 | 0.00071 | 0.00031 | 0.00008 | 0.00000 | 0.00000 | 0.00479 | 0.00222 | 0.00365 | 0.00312 |
| Q91W90 | TXND5_MOUSE | 0.00182 | 0.00149 | 0.00166 | 0.00151 | 0.00183 | 0.00102 | 0.02462 | 0.01822 | 0.03864 | 0.02612 | 0.03842 | 0.02942 |
| Q91W92 | BORG5_MOUSE | 0.00000 | 0.00000 | 0.00000 | 0.00000 | 0.00000 | 0.00000 | 0.05867 | 0.05444 | 0.07211 | 0.05845 | 0.06458 | 0.05958 |
| Q91WC0 | SETD3_MOUSE | 0.00000 | 0.00000 | 0.00000 | 0.00000 | 0.00000 | 0.00000 | 0.00168 | 0.00242 | 0.00179 | 0.00166 | 0.00185 | 0.00051 |
| Q91WD5 | NDUS2_MOUSE | 0.00904 | 0.00975 | 0.01262 | 0.01308 | 0.02504 | 0.02120 | 0.03048 | 0.02208 | 0.02731 | 0.02079 | 0.02306 | 0.01746 |
| Q91WG0 | EST2C_MOUSE | 0.00000 | 0.00000 | 0.00000 | 0.00000 | 0.00000 | 0.00000 | 0.00007 | 0.00012 | 0.00304 | 0.00140 | 0.00009 | 0.00032 |
| Q91WJ8 | FUBP1_MOUSE | 0.00000 | 0.00000 | 0.00000 | 0.00000 | 0.00000 | 0.00000 | 0.00669 | 0.00888 | 0.01249 | 0.00788 | 0.00691 | 0.01028 |



|        |             |         |         |         |         |         |         |         |         |         |         |         |         |
|--------|-------------|---------|---------|---------|---------|---------|---------|---------|---------|---------|---------|---------|---------|
| Q91WK0 | LRRF2_MOUSE | 0.00000 | 0.00000 | 0.00000 | 0.00000 | 0.00000 | 0.00000 | 0.00000 | 0.00635 | 0.00194 | 0.00244 | 0.00145 | 0.00571 |
| Q91WK2 | EIF3H_MOUSE | 0.00156 | 0.00182 | 0.00115 | 0.00030 | 0.00073 | 0.00151 | 0.00333 | 0.00377 | 0.00738 | 0.00476 | 0.00607 | 0.00355 |
| Q91WK5 | GCSH_MOUSE  | 0.00000 | 0.00000 | 0.00000 | 0.00000 | 0.00000 | 0.00000 | 0.00000 | 0.00355 | 0.00521 | 0.00176 | 0.00686 | 0.00513 |
| Q91WM2 | HDHD5_MOUSE | 0.00000 | 0.00000 | 0.00000 | 0.00000 | 0.00000 | 0.00000 | 0.00000 | 0.00043 | 0.00056 | 0.00054 | 0.00000 | 0.00000 |
| Q91WN1 | DNJC9_MOUSE | 0.00000 | 0.00000 | 0.00000 | 0.00000 | 0.00000 | 0.00000 | 0.00466 | 0.00265 | 0.00683 | 0.00571 | 0.00692 | 0.00735 |
| Q91WN4 | KMO_MOUSE   | 0.00000 | 0.00000 | 0.00000 | 0.00000 | 0.00000 | 0.00000 | 0.00000 | 0.00000 | 0.00000 | 0.00102 | 0.00000 | 0.00000 |
| Q91WP6 | SPA3N_MOUSE | 0.00000 | 0.00000 | 0.00000 | 0.00000 | 0.00000 | 0.00000 | 0.01890 | 0.01580 | 0.01366 | 0.01811 | 0.01494 | 0.01656 |
| Q91WQ3 | SYYC_MOUSE  | 0.00311 | 0.00164 | 0.00121 | 0.00093 | 0.00211 | 0.00031 | 0.02053 | 0.01511 | 0.02276 | 0.01928 | 0.01791 | 0.01482 |
| Q91WR5 | AK1CL_MOUSE | 0.00000 | 0.00000 | 0.00000 | 0.00000 | 0.00000 | 0.00000 | 0.00000 | 0.00011 | 0.00095 | 0.00026 | 0.00012 | 0.00014 |
| Q91WS0 | CISD1_MOUSE | 0.00000 | 0.00000 | 0.00000 | 0.00000 | 0.00000 | 0.00000 | 0.02003 | 0.02165 | 0.01921 | 0.02282 | 0.03058 | 0.02216 |
| Q91WT8 | RBM47_MOUSE | 0.00000 | 0.00000 | 0.00000 | 0.00000 | 0.00000 | 0.00000 | 0.00000 | 0.00445 | 0.00000 | 0.00000 | 0.00000 | 0.00000 |
| Q91WT9 | CBS_MOUSE   | 0.00000 | 0.00000 | 0.00000 | 0.00000 | 0.00000 | 0.00000 | 0.00000 | 0.00000 | 0.00000 | 0.00000 | 0.00000 | 0.00000 |
| Q91WU0 | EST1F_MOUSE | 0.00000 | 0.00000 | 0.00000 | 0.00000 | 0.00000 | 0.00000 | 0.01023 | 0.01168 | 0.01594 | 0.01231 | 0.01023 | 0.00801 |
| Q91WU5 | AS3MT_MOUSE | 0.00285 | 0.00207 | 0.00270 | 0.00293 | 0.00144 | 0.00258 | 0.00307 | 0.00381 | 0.00400 | 0.00228 | 0.00300 | 0.00356 |
| Q91WV0 | NC2B_MOUSE  | 0.00000 | 0.00000 | 0.00000 | 0.00000 | 0.00000 | 0.00000 | 0.00438 | 0.00349 | 0.00267 | 0.00363 | 0.00261 | 0.00507 |
| Q91WV7 | SLC31_MOUSE | 0.00000 | 0.00000 | 0.00000 | 0.00000 | 0.00000 | 0.00000 | 0.00000 | 0.00003 | 0.00000 | 0.00002 | 0.00000 | 0.00005 |
| Q91X17 | UROM_MOUSE  | 0.00000 | 0.00000 | 0.00000 | 0.00000 | 0.00000 | 0.00000 | 0.00000 | 0.00000 | 0.00000 | 0.00000 | 0.00000 | 0.00000 |
| Q91X20 | ASH2L_MOUSE | 0.00000 | 0.00000 | 0.00000 | 0.00000 | 0.00000 | 0.00000 | 0.00000 | 0.00000 | 0.00207 | 0.00026 | 0.00104 | 0.00115 |
| Q91X52 | DCXR_MOUSE  | 0.00000 | 0.00000 | 0.00000 | 0.00000 | 0.00000 | 0.00000 | 0.00000 | 0.01644 | 0.01390 | 0.01277 | 0.00764 | 0.01358 |
| Q91X72 | HEMO_MOUSE  | 0.06571 | 0.02150 | 0.03441 | 0.06467 | 0.03708 | 0.03018 | 0.09731 | 0.09560 | 0.09870 | 0.09805 | 0.10012 | 0.04571 |
| Q91X91 | NADC_MOUSE  | 0.00000 | 0.00000 | 0.00000 | 0.00000 | 0.00000 | 0.00000 | 0.00000 | 0.00007 | 0.00021 | 0.00000 | 0.00000 | 0.00008 |
| Q91X97 | NCALD_MOUSE | 0.00000 | 0.00000 | 0.00000 | 0.00000 | 0.00000 | 0.00000 | 0.01840 | 0.01819 | 0.01552 | 0.01640 | 0.01957 | 0.01794 |
| Q91XA9 | CHIA_MOUSE  | 0.00000 | 0.00000 | 0.00000 | 0.00000 | 0.00000 | 0.00000 | 0.00824 | 0.00655 | 0.00598 | 0.00394 | 0.00753 | 0.00886 |
| Q91XD2 | LIMS2_MOUSE | 0.00000 | 0.00000 | 0.00000 | 0.00000 | 0.00000 | 0.00000 | 0.01022 | 0.00406 | 0.00995 | 0.00300 | 0.00501 | 0.00498 |
| Q91XD6 | VPS36_MOUSE | 0.00000 | 0.00000 | 0.00000 | 0.00000 | 0.00000 | 0.00000 | 0.00183 | 0.00000 | 0.00587 | 0.00663 | 0.00000 | 0.00114 |
| Q91XE0 | GLYAT_MOUSE | 0.00000 | 0.00000 | 0.00000 | 0.00000 | 0.00000 | 0.00000 | 0.00000 | 0.00000 | 0.00000 | 0.00000 | 0.00000 | 0.00000 |
| Q91XE4 | ACY3_MOUSE  | 0.00380 | 0.00407 | 0.00199 | 0.00392 | 0.00319 | 0.00479 | 0.00370 | 0.00741 | 0.00748 | 0.00177 | 0.00470 | 0.00454 |
| Q91XE8 | TM205_MOUSE | 0.00000 | 0.00000 | 0.00000 | 0.00000 | 0.00000 | 0.00000 | 0.06548 | 0.07014 | 0.06443 | 0.06934 | 0.04510 | 0.06478 |
| Q91XF0 | PNPO_MOUSE  | 0.00000 | 0.00000 | 0.00000 | 0.00000 | 0.00000 | 0.00000 | 0.00115 | 0.00083 | 0.00225 | 0.00093 | 0.00181 | 0.00000 |
| Q91XU3 | PI42C_MOUSE | 0.00000 | 0.00000 | 0.00000 | 0.00000 | 0.00000 | 0.00000 | 0.00178 | 0.00370 | 0.00469 | 0.00485 | 0.00383 | 0.00337 |
| Q91XV3 | BASP1_MOUSE | 0.00000 | 0.00000 | 0.00000 | 0.00000 | 0.00000 | 0.00000 | 0.00054 | 0.00236 | 0.00952 | 0.00782 | 0.00434 | 0.00395 |
| Q91XY4 | PCDG4_MOUSE | 0.00000 | 0.00000 | 0.00000 | 0.00000 | 0.00000 | 0.00000 | 0.00000 | 0.00261 | 0.00250 | 0.00066 | 0.00093 | 0.00392 |
| Q91Y63 | S13A3_MOUSE | 0.00000 | 0.00000 | 0.00000 | 0.00000 | 0.00000 | 0.00000 | 0.00274 | 0.00000 | 0.00000 | 0.00000 | 0.00000 | 0.00784 |
| Q91Y97 | ALDOB_MOUSE | 0.00000 | 0.00000 | 0.00000 | 0.00000 | 0.00000 | 0.00000 | 0.00005 | 0.00001 | 0.00007 | 0.00002 | 0.00001 | 0.00002 |



|        |             |         |         |         |         |         |         |         |         |         |         |         |         |
|--------|-------------|---------|---------|---------|---------|---------|---------|---------|---------|---------|---------|---------|---------|
| Q91YD6 | VILL_MOUSE  | 0.00000 | 0.00000 | 0.00000 | 0.00000 | 0.00000 | 0.00000 | 0.00045 | 0.00036 | 0.00018 | 0.00000 | 0.00015 | 0.00000 |
| Q91YD9 | WASL_MOUSE  | 0.00000 | 0.00000 | 0.00000 | 0.00000 | 0.00000 | 0.00000 | 0.00000 | 0.00000 | 0.00058 | 0.00011 | 0.00000 | 0.00000 |
| Q91YE6 | IPO9_MOUSE  | 0.00000 | 0.00000 | 0.00000 | 0.00000 | 0.00000 | 0.00000 | 0.01000 | 0.00675 | 0.01123 | 0.01032 | 0.01278 | 0.01078 |
| Q91YE8 | SYNP2_MOUSE | 0.02188 | 0.02598 | 0.01700 | 0.01653 | 0.02314 | 0.02264 | 0.00855 | 0.00261 | 0.00918 | 0.00590 | 0.00298 | 0.00193 |
| Q91YH5 | ATLA3_MOUSE | 0.00000 | 0.00000 | 0.00000 | 0.00000 | 0.00000 | 0.00000 | 0.04194 | 0.03485 | 0.04731 | 0.04034 | 0.03883 | 0.04342 |
| Q91YI0 | ARLY_MOUSE  | 0.00000 | 0.00000 | 0.00000 | 0.00000 | 0.00000 | 0.00000 | 0.01453 | 0.01635 | 0.01628 | 0.01668 | 0.01355 | 0.01749 |
| Q91YJ2 | SNX4_MOUSE  | 0.00000 | 0.00000 | 0.00000 | 0.00000 | 0.00000 | 0.00000 | 0.00366 | 0.00514 | 0.00665 | 0.00646 | 0.00415 | 0.00622 |
| Q91YJ5 | IF2M_MOUSE  | 0.00000 | 0.00000 | 0.00000 | 0.00000 | 0.00000 | 0.00000 | 0.00000 | 0.00000 | 0.00078 | 0.00070 | 0.00000 | 0.00000 |
| Q91YN5 | UAP1_MOUSE  | 0.00000 | 0.00000 | 0.00000 | 0.00000 | 0.00000 | 0.00000 | 0.00048 | 0.00042 | 0.00127 | 0.00125 | 0.00137 | 0.00147 |
| Q91YP0 | L2HDH_MOUSE | 0.00405 | 0.01371 | 0.00437 | 0.00471 | 0.00463 | 0.01004 | 0.00981 | 0.00234 | 0.01470 | 0.00895 | 0.01255 | 0.00827 |
| Q91YP3 | DEOC_MOUSE  | 0.00000 | 0.00000 | 0.00000 | 0.00000 | 0.00000 | 0.00000 | 0.00114 | 0.00199 | 0.00255 | 0.00190 | 0.00184 | 0.00171 |
| Q91YQ5 | RPN1_MOUSE  | 0.00725 | 0.00870 | 0.00473 | 0.00418 | 0.00569 | 0.00612 | 0.04600 | 0.04160 | 0.04831 | 0.04349 | 0.04714 | 0.04135 |
| Q91YR1 | TWF1_MOUSE  | 0.00000 | 0.00000 | 0.00000 | 0.00000 | 0.00000 | 0.00000 | 0.03686 | 0.02895 | 0.03662 | 0.03374 | 0.03702 | 0.03471 |
| Q91YR7 | PRP6_MOUSE  | 0.00000 | 0.00000 | 0.00000 | 0.00000 | 0.00000 | 0.00000 | 0.00000 | 0.00176 | 0.00420 | 0.00279 | 0.00125 | 0.00113 |
| Q91YR9 | PTGR1_MOUSE | 0.00000 | 0.00000 | 0.00000 | 0.00000 | 0.00000 | 0.00000 | 0.03340 | 0.01417 | 0.01017 | 0.00875 | 0.01458 | 0.01397 |
| Q91YS8 | KCC1A_MOUSE | 0.00000 | 0.00000 | 0.00000 | 0.00000 | 0.00000 | 0.00000 | 0.01081 | 0.01300 | 0.01531 | 0.01475 | 0.01782 | 0.01559 |
| Q91YT0 | NDUV1_MOUSE | 0.46404 | 0.35171 | 0.43877 | 0.42467 | 0.29496 | 0.33344 | 0.03185 | 0.01568 | 0.01600 | 0.01901 | 0.01193 | 0.01654 |
| Q91YT8 | CSCL1_MOUSE | 0.00000 | 0.00000 | 0.00000 | 0.00000 | 0.00000 | 0.00000 | 0.00000 | 0.00000 | 0.00196 | 0.00000 | 0.00072 | 0.00059 |
| Q91YW3 | DNJC3_MOUSE | 0.00000 | 0.00000 | 0.00000 | 0.00000 | 0.00000 | 0.00000 | 0.00513 | 0.00514 | 0.00715 | 0.00505 | 0.00718 | 0.00430 |
| Q91YY4 | ATPF2_MOUSE | 0.00000 | 0.00000 | 0.00000 | 0.00000 | 0.00000 | 0.00000 | 0.00000 | 0.00000 | 0.00000 | 0.00000 | 0.00000 | 0.00000 |
| Q91Z53 | GRHPR_MOUSE | 0.00849 | 0.00494 | 0.01148 | 0.00537 | 0.00465 | 0.00391 | 0.01049 | 0.00676 | 0.01140 | 0.00845 | 0.00943 | 0.00814 |
| Q91Z67 | SRGP2_MOUSE | 0.00000 | 0.00000 | 0.00000 | 0.00000 | 0.00000 | 0.00000 | 0.00185 | 0.00160 | 0.00134 | 0.00271 | 0.00185 | 0.00326 |
| Q91Z83 | MYH7_MOUSE  | 0.06501 | 0.12968 | 0.12003 | 0.07547 | 0.08404 | 0.07936 | 0.00572 | 0.00931 | 0.00835 | 0.00546 | 0.00000 | 0.00493 |
| Q91ZA3 | PCCA_MOUSE  | 0.05961 | 0.04890 | 0.04563 | 0.05406 | 0.03674 | 0.06358 | 0.02551 | 0.03012 | 0.02425 | 0.02034 | 0.01764 | 0.03107 |
| Q91ZE0 | TMLH_MOUSE  | 0.00000 | 0.00000 | 0.00000 | 0.00000 | 0.00000 | 0.00000 | 0.00000 | 0.00000 | 0.00000 | 0.00000 | 0.00000 | 0.00000 |
| Q91ZH7 | ABHD3_MOUSE | 0.00000 | 0.00000 | 0.00000 | 0.00000 | 0.00000 | 0.00000 | 0.00000 | 0.00000 | 0.00000 | 0.00000 | 0.00000 | 0.00000 |
| Q91ZJ5 | UGPA_MOUSE  | 0.01736 | 0.00414 | 0.01475 | 0.00963 | 0.00902 | 0.00723 | 0.01929 | 0.01145 | 0.02059 | 0.01260 | 0.02506 | 0.01586 |
| Q91ZR1 | RAB4B_MOUSE | 0.00000 | 0.00000 | 0.00000 | 0.00000 | 0.00000 | 0.00000 | 0.00000 | 0.00467 | 0.00471 | 0.00266 | 0.00342 | 0.00444 |
| Q91ZR2 | SNX18_MOUSE | 0.00000 | 0.00000 | 0.00000 | 0.00000 | 0.00000 | 0.00000 | 0.00000 | 0.00316 | 0.00360 | 0.00127 | 0.00144 | 0.00110 |
| Q91ZU9 | NMD3B_MOUSE | 0.00000 | 0.00000 | 0.00000 | 0.00000 | 0.00000 | 0.00000 | 0.00729 | 0.00576 | 0.00307 | 0.00304 | 0.00000 | 0.00776 |
| Q91ZW3 | SMCA5_MOUSE | 0.00000 | 0.00000 | 0.00000 | 0.00000 | 0.00000 | 0.00000 | 0.00228 | 0.00287 | 0.00434 | 0.00414 | 0.00385 | 0.00502 |
| Q91ZX7 | LRP1_MOUSE  | 0.00026 | 0.00000 | 0.00044 | 0.00067 | 0.00036 | 0.00014 | 0.01799 | 0.02025 | 0.02814 | 0.02083 | 0.01897 | 0.01861 |
| Q920A5 | RISC_MOUSE  | 0.00000 | 0.00000 | 0.00000 | 0.00000 | 0.00000 | 0.00000 | 0.00161 | 0.00336 | 0.00093 | 0.00254 | 0.00239 | 0.00443 |
| Q920B9 | SP16H_MOUSE | 0.00000 | 0.00000 | 0.00000 | 0.00000 | 0.00000 | 0.00000 | 0.00787 | 0.00732 | 0.00475 | 0.00223 | 0.00127 | 0.00521 |

|        |             |         |         |         |         |         |         |         |         |         |         |         |         |
|--------|-------------|---------|---------|---------|---------|---------|---------|---------|---------|---------|---------|---------|---------|
| Q920E5 | FPPS_MOUSE  | 0.00000 | 0.00000 | 0.00000 | 0.00000 | 0.00000 | 0.00000 | 0.00717 | 0.00336 | 0.00858 | 0.00681 | 0.00399 | 0.00523 |
| Q920Q4 | VPS16_MOUSE | 0.00000 | 0.00000 | 0.00000 | 0.00000 | 0.00000 | 0.00000 | 0.00017 | 0.00000 | 0.00880 | 0.00401 | 0.00224 | 0.00498 |
| Q920Q6 | MSI2H_MOUSE | 0.00659 | 0.00428 | 0.00568 | 0.00489 | 0.00549 | 0.00723 | 0.00890 | 0.00923 | 0.00724 | 0.00884 | 0.00773 | 0.00947 |
| Q920R6 | VPP4_MOUSE  | 0.00000 | 0.00000 | 0.00000 | 0.00000 | 0.00000 | 0.00000 | 0.00069 | 0.00247 | 0.00106 | 0.00391 | 0.00227 | 0.00309 |
| Q921C5 | BICD2_MOUSE | 0.00000 | 0.00000 | 0.00000 | 0.00000 | 0.00000 | 0.00000 | 0.00482 | 0.00652 | 0.00454 | 0.00826 | 0.00198 | 0.00932 |
| Q921F2 | TADBP_MOUSE | 0.00000 | 0.00000 | 0.00000 | 0.00000 | 0.00000 | 0.00000 | 0.00940 | 0.01756 | 0.02286 | 0.02453 | 0.02940 | 0.01512 |
| Q921F4 | HNRL1_MOUSE | 0.00000 | 0.00000 | 0.00000 | 0.00000 | 0.00000 | 0.00000 | 0.01030 | 0.01415 | 0.01380 | 0.01284 | 0.01311 | 0.01546 |
| Q921G7 | ETFD_MOUSE  | 0.18000 | 0.12004 | 0.16111 | 0.14449 | 0.12754 | 0.07947 | 0.00640 | 0.02994 | 0.02281 | 0.03023 | 0.01674 | 0.01675 |
| Q921H8 | THIKA_MOUSE | 0.00475 | 0.01060 | 0.00598 | 0.00675 | 0.00690 | 0.00963 | 0.02121 | 0.02320 | 0.02228 | 0.02270 | 0.02329 | 0.02490 |
| Q9CQZ0 | ORML2_MOUSE | 0.00000 | 0.00000 | 0.00000 | 0.00000 | 0.00000 | 0.00000 | 0.00000 | 0.00000 | 0.00319 | 0.00053 | 0.00030 | 0.00000 |
| Q921I1 | TRFE_MOUSE  | 0.50740 | 0.26456 | 0.32069 | 0.46785 | 0.35553 | 0.25104 | 0.09629 | 0.10184 | 0.09035 | 0.12703 | 0.09558 | 0.06086 |
| Q921I9 | EXOS4_MOUSE | 0.00000 | 0.00000 | 0.00000 | 0.00000 | 0.00000 | 0.00000 | 0.00366 | 0.00000 | 0.00208 | 0.00375 | 0.00276 | 0.00164 |
| Q921J2 | RHEB_MOUSE  | 0.00000 | 0.00000 | 0.00000 | 0.00000 | 0.00000 | 0.00000 | 0.00597 | 0.00000 | 0.00267 | 0.01584 | 0.00346 | 0.00000 |
| Q921L3 | TMCO1_MOUSE | 0.00000 | 0.00000 | 0.00000 | 0.00000 | 0.00000 | 0.00000 | 0.00095 | 0.00000 | 0.00153 | 0.00000 | 0.00000 | 0.00000 |
| Q921M3 | SF3B3_MOUSE | 0.00000 | 0.00000 | 0.00000 | 0.00000 | 0.00000 | 0.00000 | 0.02774 | 0.03301 | 0.03347 | 0.02914 | 0.03216 | 0.03528 |
| Q921M4 | GOGA2_MOUSE | 0.00000 | 0.00000 | 0.00000 | 0.00000 | 0.00000 | 0.00000 | 0.00487 | 0.00247 | 0.00502 | 0.00552 | 0.00588 | 0.00444 |
| Q921M7 | CYRIB_MOUSE | 0.00945 | 0.00305 | 0.01083 | 0.00301 | 0.02017 | 0.00239 | 0.01294 | 0.01266 | 0.02397 | 0.02041 | 0.02490 | 0.02596 |
| Q921S7 | RM37_MOUSE  | 0.00933 | 0.00630 | 0.00640 | 0.00613 | 0.00954 | 0.00564 | 0.00176 | 0.00076 | 0.00126 | 0.00109 | 0.00000 | 0.00259 |
| Q921T2 | TOIP1_MOUSE | 0.00130 | 0.00365 | 0.00143 | 0.00090 | 0.00311 | 0.00137 | 0.01065 | 0.00956 | 0.01234 | 0.01176 | 0.01331 | 0.01331 |
| Q921U8 | SMTN_MOUSE  | 0.00000 | 0.00000 | 0.00000 | 0.00000 | 0.00000 | 0.00000 | 0.01657 | 0.00702 | 0.00748 | 0.00375 | 0.01039 | 0.00945 |
| Q921W4 | QORL1_MOUSE | 0.00000 | 0.00000 | 0.00000 | 0.00000 | 0.00000 | 0.00000 | 0.00042 | 0.00000 | 0.00230 | 0.00000 | 0.00057 | 0.00058 |
| Q921X9 | PDIA5_MOUSE | 0.00000 | 0.00000 | 0.00000 | 0.00000 | 0.00000 | 0.00000 | 0.00013 | 0.00127 | 0.00141 | 0.00150 | 0.00382 | 0.00201 |
| Q921Y0 | MOB1A_MOUSE | 0.00000 | 0.00000 | 0.00000 | 0.00000 | 0.00000 | 0.00000 | 0.00953 | 0.01018 | 0.01169 | 0.01039 | 0.00544 | 0.00997 |
| Q921Z5 | TFIP8_MOUSE | 0.00000 | 0.00000 | 0.00000 | 0.00000 | 0.00000 | 0.00000 | 0.00040 | 0.00035 | 0.00057 | 0.00029 | 0.00044 | 0.00000 |
| Q922B1 | MACD1_MOUSE | 0.05402 | 0.03393 | 0.05981 | 0.05566 | 0.04766 | 0.03142 | 0.01098 | 0.00711 | 0.00000 | 0.00551 | 0.00244 | 0.00000 |
| Q922B2 | SYDC_MOUSE  | 0.00486 | 0.00532 | 0.00730 | 0.00699 | 0.00863 | 0.00446 | 0.02223 | 0.02350 | 0.02475 | 0.02669 | 0.02842 | 0.02727 |
| Q922D4 | PP6R3_MOUSE | 0.00000 | 0.00000 | 0.00000 | 0.00000 | 0.00000 | 0.00000 | 0.00599 | 0.00529 | 0.00513 | 0.00535 | 0.00594 | 0.00590 |
| Q922D8 | C1TC_MOUSE  | 0.00434 | 0.00250 | 0.00312 | 0.00511 | 0.00228 | 0.00336 | 0.01948 | 0.02056 | 0.02078 | 0.01937 | 0.01896 | 0.02123 |
| Q922E4 | PCY2_MOUSE  | 0.00000 | 0.00000 | 0.00000 | 0.00000 | 0.00000 | 0.00000 | 0.00000 | 0.00000 | 0.00540 | 0.00000 | 0.00247 | 0.00179 |
| Q922F4 | TBB6_MOUSE  | 0.01337 | 0.01091 | 0.00774 | 0.01684 | 0.01439 | 0.01924 | 0.00000 | 0.00395 | 0.00131 | 0.00223 | 0.00000 | 0.00104 |
| Q922H2 | PDK3_MOUSE  | 0.00000 | 0.00000 | 0.00000 | 0.00000 | 0.00000 | 0.00000 | 0.00000 | 0.00128 | 0.00318 | 0.00258 | 0.00213 | 0.00180 |
| Q922H4 | GMPPA_MOUSE | 0.00000 | 0.00000 | 0.00000 | 0.00000 | 0.00000 | 0.00000 | 0.00226 | 0.00000 | 0.00421 | 0.00433 | 0.00139 | 0.00363 |
| Q922J3 | CLIP1_MOUSE | 0.01380 | 0.01665 | 0.00980 | 0.01065 | 0.00999 | 0.00797 | 0.01925 | 0.03344 | 0.03961 | 0.04118 | 0.03949 | 0.02700 |
| Q922J6 | TSN2_MOUSE  | 0.00000 | 0.00000 | 0.00000 | 0.00000 | 0.00000 | 0.00000 | 0.00000 | 0.00000 | 0.00266 | 0.00000 | 0.00000 | 0.00000 |

|        |             |         |         |         |         |         |         |         |         |         |         |         |         |
|--------|-------------|---------|---------|---------|---------|---------|---------|---------|---------|---------|---------|---------|---------|
| Q922P9 | GLYR1_MOUSE | 0.00000 | 0.00000 | 0.00000 | 0.00000 | 0.00000 | 0.00000 | 0.01034 | 0.00340 | 0.00875 | 0.00699 | 0.01117 | 0.00942 |
| Q922Q1 | MARC2_MOUSE | 0.00209 | 0.00451 | 0.00231 | 0.00256 | 0.00307 | 0.00416 | 0.00449 | 0.00551 | 0.00372 | 0.00387 | 0.00099 | 0.00452 |
| Q922Q4 | P5CR2_MOUSE | 0.00000 | 0.00000 | 0.00000 | 0.00000 | 0.00000 | 0.00000 | 0.00000 | 0.00087 | 0.00258 | 0.00140 | 0.00088 | 0.00055 |
| Q922Q8 | LRC59_MOUSE | 0.00000 | 0.00000 | 0.00000 | 0.00000 | 0.00000 | 0.00000 | 0.01008 | 0.01077 | 0.00641 | 0.00735 | 0.00532 | 0.00645 |
| Q922Q9 | CHID1_MOUSE | 0.00000 | 0.00000 | 0.00000 | 0.00000 | 0.00000 | 0.00000 | 0.00262 | 0.00158 | 0.00239 | 0.00115 | 0.00219 | 0.00136 |
| Q922R8 | PDIA6_MOUSE | 0.00349 | 0.02535 | 0.01589 | 0.00736 | 0.00759 | 0.00259 | 0.03525 | 0.03448 | 0.05090 | 0.04680 | 0.04234 | 0.04513 |
| Q922Y1 | UBXN1_MOUSE | 0.00000 | 0.00000 | 0.00000 | 0.00000 | 0.00000 | 0.00000 | 0.01219 | 0.00884 | 0.01152 | 0.01035 | 0.01083 | 0.01001 |
| Q922Z0 | OXDD_MOUSE  | 0.00000 | 0.00000 | 0.00000 | 0.00000 | 0.00000 | 0.00000 | 0.00000 | 0.00000 | 0.00000 | 0.00000 | 0.00000 | 0.00000 |
| Q923B0 | GGACT_MOUSE | 0.00000 | 0.00000 | 0.00000 | 0.00000 | 0.00000 | 0.00000 | 0.00000 | 0.00000 | 0.00000 | 0.00000 | 0.00000 | 0.00000 |
| Q923B6 | STEA4_MOUSE | 0.01312 | 0.00404 | 0.00274 | 0.00312 | 0.00326 | 0.00163 | 0.00000 | 0.00000 | 0.00192 | 0.00000 | 0.00000 | 0.00000 |
| Q923D2 | BLVRB_MOUSE | 0.00000 | 0.00000 | 0.00000 | 0.00000 | 0.00000 | 0.00000 | 0.01894 | 0.01717 | 0.02388 | 0.04064 | 0.04054 | 0.01554 |
| Q923D4 | SF3B5_MOUSE | 0.00000 | 0.00000 | 0.00000 | 0.00000 | 0.00000 | 0.00000 | 0.00000 | 0.00038 | 0.00321 | 0.00164 | 0.00000 | 0.00152 |
| Q923G2 | RPAB3_MOUSE | 0.00000 | 0.00000 | 0.00000 | 0.00000 | 0.00000 | 0.00000 | 0.00228 | 0.00184 | 0.00265 | 0.00291 | 0.00253 | 0.00131 |
| Q923I7 | SC5A2_MOUSE | 0.00000 | 0.00000 | 0.00000 | 0.00000 | 0.00000 | 0.00000 | 0.00000 | 0.01141 | 0.01347 | 0.01218 | 0.00760 | 0.00618 |
| Q923Q2 | STA13_MOUSE | 0.00000 | 0.00000 | 0.00000 | 0.00000 | 0.00000 | 0.00000 | 0.03115 | 0.00367 | 0.00657 | 0.00334 | 0.00797 | 0.00676 |
| Q923T9 | KCC2G_MOUSE | 0.00409 | 0.00552 | 0.00309 | 0.00213 | 0.00269 | 0.00379 | 0.00696 | 0.00542 | 0.00533 | 0.00347 | 0.00626 | 0.00683 |
| Q923X1 | AGRL4_MOUSE | 0.00000 | 0.00000 | 0.00000 | 0.00000 | 0.00000 | 0.00000 | 0.00543 | 0.00615 | 0.00865 | 0.00633 | 0.00761 | 0.00652 |
| Q923X4 | GLRX2_MOUSE | 0.00000 | 0.00000 | 0.00000 | 0.00000 | 0.00000 | 0.00000 | 0.00000 | 0.00000 | 0.00000 | 0.00000 | 0.00000 | 0.00000 |
| Q924C1 | XPO5_MOUSE  | 0.00000 | 0.00000 | 0.00000 | 0.00000 | 0.00000 | 0.00000 | 0.00000 | 0.00000 | 0.00000 | 0.00224 | 0.00176 | 0.00000 |
| Q924D0 | RT411_MOUSE | 0.01921 | 0.01142 | 0.02426 | 0.00971 | 0.01539 | 0.01109 | 0.00000 | 0.00000 | 0.00000 | 0.00000 | 0.00000 | 0.00000 |
| Q924K8 | MTA3_MOUSE  | 0.00000 | 0.00000 | 0.00000 | 0.00000 | 0.00000 | 0.00000 | 0.00142 | 0.00289 | 0.00321 | 0.00258 | 0.00278 | 0.00246 |
| Q924L1 | LTMD1_MOUSE | 0.00000 | 0.00000 | 0.00000 | 0.00000 | 0.00000 | 0.00000 | 0.00211 | 0.00064 | 0.00165 | 0.00000 | 0.00060 | 0.00131 |
| Q924M7 | MPI_MOUSE   | 0.07415 | 0.04517 | 0.07195 | 0.05459 | 0.07355 | 0.04841 | 0.00754 | 0.00363 | 0.00692 | 0.00661 | 0.00458 | 0.00589 |
| Q924N4 | S12A6_MOUSE | 0.00000 | 0.00000 | 0.00000 | 0.00000 | 0.00000 | 0.00000 | 0.00000 | 0.00000 | 0.00000 | 0.00000 | 0.00000 | 0.00000 |
| Q924T2 | RT02_MOUSE  | 0.00000 | 0.00000 | 0.00000 | 0.00000 | 0.00000 | 0.00000 | 0.00000 | 0.00000 | 0.00000 | 0.00000 | 0.00000 | 0.00000 |
| Q924X2 | CPT1B_MOUSE | 0.01295 | 0.02450 | 0.00747 | 0.02046 | 0.01074 | 0.04933 | 0.00295 | 0.00055 | 0.00176 | 0.00305 | 0.00000 | 0.00103 |
| Q924Z4 | CERS2_MOUSE | 0.00000 | 0.00000 | 0.00000 | 0.00000 | 0.00000 | 0.00000 | 0.00476 | 0.00400 | 0.00791 | 0.00645 | 0.00647 | 0.00492 |
| Q925B0 | PAWR_MOUSE  | 0.00000 | 0.00000 | 0.00000 | 0.00000 | 0.00000 | 0.00000 | 0.00000 | 0.00729 | 0.00713 | 0.00879 | 0.00805 | 0.00792 |
| Q925F2 | ESAM_MOUSE  | 0.00000 | 0.00000 | 0.00000 | 0.00000 | 0.00000 | 0.00000 | 0.03971 | 0.03580 | 0.05247 | 0.04012 | 0.04939 | 0.05100 |
| Q925I1 | ATAD3_MOUSE | 0.00248 | 0.00113 | 0.00460 | 0.00431 | 0.00292 | 0.00135 | 0.00817 | 0.00118 | 0.00174 | 0.00383 | 0.01878 | 0.00675 |
| Q925N0 | SFXN5_MOUSE | 0.00000 | 0.00000 | 0.00000 | 0.00000 | 0.00000 | 0.00000 | 0.00000 | 0.00258 | 0.00000 | 0.00000 | 0.00000 | 0.00349 |
| Q925N2 | SFXN2_MOUSE | 0.00000 | 0.00000 | 0.00000 | 0.00000 | 0.00000 | 0.00000 | 0.00000 | 0.00218 | 0.00000 | 0.00000 | 0.00000 | 0.00000 |
| Q93092 | TALDO_MOUSE | 0.00000 | 0.00000 | 0.00000 | 0.00000 | 0.00000 | 0.00000 | 0.01495 | 0.05984 | 0.07981 | 0.06646 | 0.06085 | 0.05180 |
| Q99020 | ROAA_MOUSE  | 0.00000 | 0.00000 | 0.00000 | 0.00000 | 0.00000 | 0.00000 | 0.03935 | 0.03900 | 0.03017 | 0.03799 | 0.02897 | 0.03761 |

|        |             |         |         |         |         |         |         |         |         |         |         |         |         |
|--------|-------------|---------|---------|---------|---------|---------|---------|---------|---------|---------|---------|---------|---------|
| Q99388 | CSPRS_MOUSE | 0.00000 | 0.00000 | 0.00000 | 0.00000 | 0.00000 | 0.00000 | 0.01119 | 0.00757 | 0.00869 | 0.00880 | 0.01183 | 0.01144 |
| Q99J08 | S14L2_MOUSE | 0.00000 | 0.00000 | 0.00000 | 0.00000 | 0.00000 | 0.00000 | 0.00000 | 0.02847 | 0.01872 | 0.01815 | 0.00866 | 0.01270 |
| Q99J23 | GHDC_MOUSE  | 0.00000 | 0.00000 | 0.00000 | 0.00000 | 0.00000 | 0.00000 | 0.00000 | 0.00059 | 0.00090 | 0.00000 | 0.00000 | 0.00049 |
| Q99J25 | MRM1_MOUSE  | 0.00000 | 0.00000 | 0.00000 | 0.00000 | 0.00000 | 0.00000 | 0.05834 | 0.00412 | 0.00553 | 0.00443 | 0.01814 | 0.00281 |
| Q99J27 | ACATN_MOUSE | 0.00000 | 0.00000 | 0.00000 | 0.00000 | 0.00000 | 0.00000 | 0.00000 | 0.00000 | 0.00000 | 0.00000 | 0.00000 | 0.00000 |
| Q99J36 | THUM1_MOUSE | 0.00000 | 0.00000 | 0.00000 | 0.00000 | 0.00000 | 0.00000 | 0.00311 | 0.00159 | 0.00513 | 0.00324 | 0.00121 | 0.00342 |
| Q99J39 | DCMC_MOUSE  | 0.01418 | 0.01299 | 0.00914 | 0.01006 | 0.00739 | 0.00901 | 0.00360 | 0.00374 | 0.00000 | 0.00212 | 0.00245 | 0.00320 |
| Q99J45 | NRBP_MOUSE  | 0.00000 | 0.00000 | 0.00000 | 0.00000 | 0.00000 | 0.00000 | 0.00135 | 0.00058 | 0.00244 | 0.00225 | 0.00131 | 0.00102 |
| Q99J47 | DRS7B_MOUSE | 0.00000 | 0.00000 | 0.00000 | 0.00000 | 0.00000 | 0.00000 | 0.00230 | 0.00428 | 0.00086 | 0.00264 | 0.00000 | 0.00373 |
| Q99J56 | DERL1_MOUSE | 0.00000 | 0.00000 | 0.00000 | 0.00000 | 0.00000 | 0.00000 | 0.00154 | 0.00476 | 0.00374 | 0.00250 | 0.00134 | 0.00572 |
| Q99J77 | SIAS_MOUSE  | 0.00000 | 0.00000 | 0.00000 | 0.00000 | 0.00000 | 0.00000 | 0.01223 | 0.01878 | 0.01672 | 0.01760 | 0.00860 | 0.01362 |
| Q99J93 | IFM2_MOUSE  | 0.00000 | 0.00000 | 0.00000 | 0.00000 | 0.00000 | 0.00000 | 0.01699 | 0.01936 | 0.00320 | 0.02367 | 0.00125 | 0.00000 |
| Q99J99 | THTM_MOUSE  | 0.00387 | 0.00294 | 0.00282 | 0.00387 | 0.00379 | 0.00261 | 0.00095 | 0.00432 | 0.00259 | 0.00283 | 0.00076 | 0.00134 |
| Q99JB2 | STML2_MOUSE | 0.00208 | 0.00278 | 0.00218 | 0.00155 | 0.00238 | 0.00166 | 0.01027 | 0.00975 | 0.01177 | 0.01146 | 0.01132 | 0.01107 |
| Q99JB7 | AMNLS_MOUSE | 0.00000 | 0.00000 | 0.00000 | 0.00000 | 0.00000 | 0.00000 | 0.00131 | 0.00000 | 0.00000 | 0.00000 | 0.00132 | 0.00000 |
| Q99JB8 | PACN3_MOUSE | 0.01514 | 0.01548 | 0.01037 | 0.00793 | 0.01233 | 0.01622 | 0.01102 | 0.00963 | 0.00532 | 0.00699 | 0.00354 | 0.00779 |
| Q99JF5 | MVD1_MOUSE  | 0.00000 | 0.00000 | 0.00000 | 0.00000 | 0.00000 | 0.00000 | 0.00000 | 0.00000 | 0.00000 | 0.00000 | 0.00000 | 0.00000 |
| Q99JF8 | PSIP1_MOUSE | 0.00000 | 0.00000 | 0.00000 | 0.00000 | 0.00000 | 0.00000 | 0.00756 | 0.00649 | 0.00703 | 0.00506 | 0.00921 | 0.00982 |
| Q99JG3 | ANX13_MOUSE | 0.00000 | 0.00000 | 0.00000 | 0.00000 | 0.00000 | 0.00000 | 0.00559 | 0.00104 | 0.00265 | 0.00221 | 0.00359 | 0.00253 |
| Q99JH8 | ERD21_MOUSE | 0.00000 | 0.00000 | 0.00000 | 0.00000 | 0.00000 | 0.00000 | 0.00852 | 0.00629 | 0.01139 | 0.01016 | 0.01163 | 0.00777 |
| Q99JI1 | MSTN1_MOUSE | 0.00000 | 0.00000 | 0.00000 | 0.00000 | 0.00000 | 0.00000 | 0.00000 | 0.00060 | 0.00063 | 0.00126 | 0.00062 | 0.00041 |
| Q99JI4 | PSMD6_MOUSE | 0.00382 | 0.00399 | 0.00375 | 0.00303 | 0.00471 | 0.00497 | 0.01825 | 0.01373 | 0.02303 | 0.02031 | 0.02205 | 0.01967 |
| Q99JI6 | RAP1B_MOUSE | 0.01195 | 0.00916 | 0.00753 | 0.00568 | 0.00612 | 0.00475 | 0.04750 | 0.05265 | 0.05406 | 0.06659 | 0.05714 | 0.06972 |
| Q99JP6 | HOME3_MOUSE | 0.00000 | 0.00000 | 0.00000 | 0.00000 | 0.00000 | 0.00000 | 0.00150 | 0.00563 | 0.00808 | 0.00490 | 0.00958 | 0.00857 |
| Q99JR1 | SFXN1_MOUSE | 0.00000 | 0.00000 | 0.00000 | 0.00000 | 0.00000 | 0.00000 | 0.01154 | 0.01073 | 0.01148 | 0.00534 | 0.00773 | 0.00807 |
| Q99JR5 | TINAL_MOUSE | 0.00164 | 0.00151 | 0.00124 | 0.00133 | 0.00232 | 0.00161 | 0.04541 | 0.04413 | 0.04295 | 0.02827 | 0.04795 | 0.05177 |
| Q99JR8 | SMRD2_MOUSE | 0.00000 | 0.00000 | 0.00000 | 0.00000 | 0.00000 | 0.00000 | 0.00333 | 0.00130 | 0.00469 | 0.00123 | 0.00556 | 0.00256 |
| Q99JW2 | ACY1_MOUSE  | 0.00000 | 0.00000 | 0.00000 | 0.00000 | 0.00000 | 0.00000 | 0.00000 | 0.00171 | 0.00000 | 0.00000 | 0.00000 | 0.00104 |
| Q99JW4 | LIMS1_MOUSE | 0.00000 | 0.00000 | 0.00000 | 0.00000 | 0.00000 | 0.00000 | 0.01488 | 0.04597 | 0.01738 | 0.03107 | 0.01251 | 0.03104 |
| Q99JW5 | EPCAM_MOUSE | 0.00000 | 0.00000 | 0.00000 | 0.00000 | 0.00000 | 0.00000 | 0.01071 | 0.00786 | 0.00739 | 0.00735 | 0.01381 | 0.01230 |
| Q99JX3 | GORS2_MOUSE | 0.00000 | 0.00000 | 0.00000 | 0.00000 | 0.00000 | 0.00000 | 0.00875 | 0.01752 | 0.01039 | 0.01296 | 0.01019 | 0.01502 |
| Q99JX4 | EIF3M_MOUSE | 0.00000 | 0.00000 | 0.00000 | 0.00000 | 0.00000 | 0.00000 | 0.00698 | 0.00837 | 0.00992 | 0.00847 | 0.01215 | 0.00752 |
| Q99JX7 | NXF1_MOUSE  | 0.00000 | 0.00000 | 0.00000 | 0.00000 | 0.00000 | 0.00000 | 0.00000 | 0.00000 | 0.00210 | 0.00123 | 0.00000 | 0.00000 |
| Q99JY0 | ECHB_MOUSE  | 0.48759 | 0.35029 | 0.43028 | 0.37308 | 0.39294 | 0.41038 | 0.08924 | 0.04718 | 0.05549 | 0.05314 | 0.05241 | 0.04787 |

|        |             |         |         |         |         |         |         |         |         |         |         |         |         |
|--------|-------------|---------|---------|---------|---------|---------|---------|---------|---------|---------|---------|---------|---------|
| Q99JY3 | GIMA4_MOUSE | 0.00603 | 0.00913 | 0.01335 | 0.01547 | 0.02125 | 0.00823 | 0.08778 | 0.07972 | 0.11799 | 0.10463 | 0.12842 | 0.10399 |
| Q99JY9 | ARP3_MOUSE  | 0.00536 | 0.00551 | 0.00523 | 0.00741 | 0.00238 | 0.00144 | 0.06713 | 0.07627 | 0.07188 | 0.07867 | 0.06694 | 0.07115 |
| Q99K01 | PDXD1_MOUSE | 0.00000 | 0.00000 | 0.00000 | 0.00000 | 0.00000 | 0.00000 | 0.00120 | 0.00277 | 0.00644 | 0.00441 | 0.00614 | 0.00382 |
| Q99K23 | UFSP2_MOUSE | 0.00000 | 0.00000 | 0.00000 | 0.00000 | 0.00000 | 0.00000 | 0.00000 | 0.00084 | 0.00202 | 0.00090 | 0.00000 | 0.00000 |
| Q99K28 | ARFG2_MOUSE | 0.00000 | 0.00000 | 0.00000 | 0.00000 | 0.00000 | 0.00000 | 0.00301 | 0.00199 | 0.00423 | 0.00155 | 0.00374 | 0.00382 |
| Q99K30 | ES8L2_MOUSE | 0.00000 | 0.00000 | 0.00000 | 0.00000 | 0.00000 | 0.00000 | 0.01251 | 0.01148 | 0.01580 | 0.01193 | 0.01681 | 0.01633 |
| Q99K41 | EMIL1_MOUSE | 0.00029 | 0.00041 | 0.00037 | 0.00054 | 0.00017 | 0.00000 | 0.06343 | 0.04507 | 0.04709 | 0.02741 | 0.06878 | 0.06789 |
| Q99K48 | NONO_MOUSE  | 0.00000 | 0.00000 | 0.00000 | 0.00000 | 0.00000 | 0.00000 | 0.03182 | 0.04266 | 0.02797 | 0.04465 | 0.03525 | 0.04280 |
| Q99K51 | PLST_MOUSE  | 0.00332 | 0.00287 | 0.00288 | 0.00296 | 0.00301 | 0.00417 | 0.10053 | 0.11472 | 0.11264 | 0.10839 | 0.10033 | 0.11557 |
| Q99K67 | AASS_MOUSE  | 0.00000 | 0.00000 | 0.00000 | 0.00000 | 0.00000 | 0.00000 | 0.00005 | 0.00002 | 0.00021 | 0.00021 | 0.00016 | 0.00003 |
| Q99K70 | RRAGC_MOUSE | 0.00000 | 0.00000 | 0.00000 | 0.00000 | 0.00000 | 0.00000 | 0.00584 | 0.00937 | 0.00859 | 0.00842 | 0.00735 | 0.00917 |
| Q99KB8 | GLO2_MOUSE  | 0.00000 | 0.00000 | 0.00000 | 0.00000 | 0.00000 | 0.00000 | 0.00030 | 0.00274 | 0.00356 | 0.00250 | 0.00200 | 0.00152 |
| Q99KC7 | SMAGP_MOUSE | 0.00000 | 0.00000 | 0.00000 | 0.00000 | 0.00000 | 0.00000 | 0.00000 | 0.00000 | 0.00291 | 0.00000 | 0.00287 | 0.00000 |
| Q99KC8 | VMA5A_MOUSE | 0.00695 | 0.00595 | 0.00627 | 0.00419 | 0.00489 | 0.00460 | 0.01862 | 0.01981 | 0.02434 | 0.02245 | 0.01595 | 0.02155 |
| Q99KD5 | UN45A_MOUSE | 0.00000 | 0.00000 | 0.00000 | 0.00000 | 0.00000 | 0.00000 | 0.00441 | 0.00441 | 0.00441 | 0.00609 | 0.00454 | 0.00347 |
| Q99KF1 | TMED9_MOUSE | 0.00314 | 0.00377 | 0.00197 | 0.00427 | 0.00445 | 0.00454 | 0.00246 | 0.00924 | 0.01476 | 0.00942 | 0.00427 | 0.00821 |
| Q99KH8 | STK24_MOUSE | 0.00000 | 0.00000 | 0.00000 | 0.00000 | 0.00000 | 0.00000 | 0.01733 | 0.01631 | 0.01549 | 0.01491 | 0.01635 | 0.01661 |
| Q99KI0 | ACON_MOUSE  | 3.95162 | 3.72043 | 3.39566 | 3.75236 | 3.98764 | 2.97736 | 0.16959 | 0.09640 | 0.09272 | 0.10445 | 0.09484 | 0.09048 |
| Q99KI3 | EMC3_MOUSE  | 0.00000 | 0.00000 | 0.00000 | 0.00000 | 0.00000 | 0.00000 | 0.00365 | 0.00691 | 0.00375 | 0.00629 | 0.00226 | 0.00853 |
| Q99KJ8 | DCTN2_MOUSE | 0.02354 | 0.02092 | 0.01956 | 0.02159 | 0.01641 | 0.02148 | 0.05298 | 0.05071 | 0.05941 | 0.05389 | 0.05524 | 0.06725 |
| Q99KK7 | DPP3_MOUSE  | 0.00815 | 0.00490 | 0.00540 | 0.00684 | 0.00657 | 0.00443 | 0.01399 | 0.01181 | 0.01763 | 0.01593 | 0.01786 | 0.01779 |
| Q99KN9 | EPN4_MOUSE  | 0.00000 | 0.00000 | 0.00000 | 0.00000 | 0.00000 | 0.00000 | 0.00504 | 0.00858 | 0.01155 | 0.00986 | 0.00644 | 0.00841 |
| Q99KP3 | CRYL1_MOUSE | 0.00000 | 0.00000 | 0.00000 | 0.00000 | 0.00000 | 0.00000 | 0.01824 | 0.02770 | 0.02022 | 0.02054 | 0.03109 | 0.03142 |
| Q99KP6 | PRP19_MOUSE | 0.00000 | 0.00000 | 0.00000 | 0.00000 | 0.00000 | 0.00000 | 0.00781 | 0.00861 | 0.01427 | 0.01207 | 0.01545 | 0.01226 |
| Q99KQ4 | NAMPT_MOUSE | 0.02794 | 0.02232 | 0.02972 | 0.02027 | 0.03133 | 0.02685 | 0.01955 | 0.01708 | 0.02567 | 0.01598 | 0.03309 | 0.02309 |
| Q99KR3 | LACB2_MOUSE | 0.00000 | 0.00000 | 0.00000 | 0.00000 | 0.00000 | 0.00000 | 0.00000 | 0.00200 | 0.00461 | 0.00236 | 0.00220 | 0.00134 |
| Q99KR7 | PPIF_MOUSE  | 0.00000 | 0.00000 | 0.00000 | 0.00000 | 0.00000 | 0.00000 | 0.00000 | 0.00000 | 0.00000 | 0.00000 | 0.00000 | 0.00000 |
| Q99KS6 | ADPRM_MOUSE | 0.00000 | 0.00000 | 0.00000 | 0.00000 | 0.00000 | 0.00000 | 0.00000 | 0.00000 | 0.00118 | 0.00000 | 0.00000 | 0.00000 |
| Q99KV1 | DJB11_MOUSE | 0.00197 | 0.00133 | 0.00256 | 0.00195 | 0.00265 | 0.00226 | 0.02052 | 0.01498 | 0.02060 | 0.01540 | 0.01951 | 0.01556 |
| Q99KW9 | TIP_MOUSE   | 0.00000 | 0.00000 | 0.00000 | 0.00000 | 0.00000 | 0.00000 | 0.00042 | 0.00000 | 0.00205 | 0.00052 | 0.00000 | 0.00000 |
| Q99KY4 | GAK_MOUSE   | 0.00000 | 0.00000 | 0.00000 | 0.00000 | 0.00000 | 0.00000 | 0.00519 | 0.00477 | 0.00847 | 0.00201 | 0.00769 | 0.00710 |
| Q99L04 | DHRS1_MOUSE | 0.00399 | 0.00245 | 0.00241 | 0.00226 | 0.00360 | 0.00128 | 0.00000 | 0.00063 | 0.00586 | 0.00392 | 0.00229 | 0.00217 |
| Q99L13 | 3HIDH_MOUSE | 0.05613 | 0.03008 | 0.02638 | 0.03468 | 0.03308 | 0.03500 | 0.02128 | 0.01966 | 0.02237 | 0.01895 | 0.02062 | 0.02069 |
| Q99L20 | GSTT3_MOUSE | 0.00000 | 0.00000 | 0.00000 | 0.00000 | 0.00000 | 0.00000 | 0.02251 | 0.02920 | 0.03176 | 0.02690 | 0.03406 | 0.03140 |



|        |             |         |         |         |         |         |         |         |         |         |         |         |         |
|--------|-------------|---------|---------|---------|---------|---------|---------|---------|---------|---------|---------|---------|---------|
| Q99L43 | CDS2_MOUSE  | 0.00393 | 0.00533 | 0.00726 | 0.00776 | 0.00475 | 0.00709 | 0.04802 | 0.03935 | 0.03772 | 0.04218 | 0.03776 | 0.04466 |
| Q99L45 | IF2B_MOUSE  | 0.00000 | 0.00000 | 0.00000 | 0.00000 | 0.00000 | 0.00000 | 0.01510 | 0.01039 | 0.01043 | 0.00973 | 0.00936 | 0.00964 |
| Q99L47 | F10A1_MOUSE | 0.00000 | 0.00000 | 0.00000 | 0.00000 | 0.00000 | 0.00000 | 0.02463 | 0.03830 | 0.02013 | 0.02772 | 0.02150 | 0.02922 |
| Q99L60 | VATC2_MOUSE | 0.00000 | 0.00000 | 0.00000 | 0.00000 | 0.00000 | 0.00000 | 0.00000 | 0.00000 | 0.00000 | 0.00000 | 0.00000 | 0.00000 |
| Q99L88 | SNTB1_MOUSE | 0.00000 | 0.00000 | 0.00000 | 0.00000 | 0.00000 | 0.00000 | 0.00479 | 0.00723 | 0.00406 | 0.00342 | 0.00460 | 0.00478 |
| Q99LB2 | DHRS4_MOUSE | 0.00945 | 0.00981 | 0.00962 | 0.00542 | 0.01192 | 0.00706 | 0.01495 | 0.00648 | 0.00950 | 0.01003 | 0.00798 | 0.00971 |
| Q99LB6 | MAT2B_MOUSE | 0.00000 | 0.00000 | 0.00000 | 0.00000 | 0.00000 | 0.00000 | 0.00296 | 0.00078 | 0.00307 | 0.00256 | 0.00358 | 0.00275 |
| Q99LB7 | SARDH_MOUSE | 0.00000 | 0.00000 | 0.00000 | 0.00000 | 0.00000 | 0.00000 | 0.00039 | 0.00010 | 0.00019 | 0.00003 | 0.00005 | 0.00011 |
| Q99LC3 | NDUAA_MOUSE | 0.14226 | 0.12524 | 0.18662 | 0.16818 | 0.14912 | 0.20787 | 0.01916 | 0.01000 | 0.01422 | 0.01273 | 0.01142 | 0.01083 |
| Q99LC5 | ETFA_MOUSE  | 1.22079 | 0.64266 | 1.25194 | 0.81125 | 0.96389 | 0.80340 | 0.06712 | 0.04321 | 0.04740 | 0.04671 | 0.04374 | 0.04935 |
| Q99LD4 | CSN1_MOUSE  | 0.00000 | 0.00000 | 0.00000 | 0.00000 | 0.00000 | 0.00000 | 0.01675 | 0.01218 | 0.01600 | 0.01325 | 0.01643 | 0.01358 |
| Q99LD8 | DDAH2_MOUSE | 0.00000 | 0.00000 | 0.00000 | 0.00000 | 0.00000 | 0.00000 | 0.04191 | 0.02989 | 0.04216 | 0.04485 | 0.04426 | 0.04918 |
| Q99LD9 | EI2BB_MOUSE | 0.00000 | 0.00000 | 0.00000 | 0.00000 | 0.00000 | 0.00000 | 0.00185 | 0.00018 | 0.00422 | 0.00378 | 0.00421 | 0.00313 |
| Q99LF4 | RTCB_MOUSE  | 0.00272 | 0.00178 | 0.00370 | 0.00189 | 0.00282 | 0.00046 | 0.00509 | 0.01418 | 0.01175 | 0.00906 | 0.01321 | 0.01558 |
| Q99LG2 | TNPO2_MOUSE | 0.00000 | 0.00000 | 0.00000 | 0.00000 | 0.00000 | 0.00000 | 0.00000 | 0.00485 | 0.00074 | 0.00169 | 0.00170 | 0.00141 |
| Q99LI8 | HGS_MOUSE   | 0.00000 | 0.00000 | 0.00000 | 0.00000 | 0.00000 | 0.00000 | 0.00000 | 0.00508 | 0.00380 | 0.00385 | 0.00259 | 0.00748 |
| Q99LI0 | CT2NL_MOUSE | 0.00000 | 0.00000 | 0.00000 | 0.00000 | 0.00000 | 0.00000 | 0.00000 | 0.00029 | 0.00123 | 0.00000 | 0.00075 | 0.00049 |
| Q99LI1 | FUCO_MOUSE  | 0.00000 | 0.00000 | 0.00000 | 0.00000 | 0.00000 | 0.00000 | 0.00052 | 0.00048 | 0.00172 | 0.00026 | 0.00063 | 0.00024 |
| Q99LP6 | GRPE1_MOUSE | 0.00000 | 0.00000 | 0.00000 | 0.00000 | 0.00000 | 0.00000 | 0.00352 | 0.00185 | 0.00435 | 0.00339 | 0.00428 | 0.00331 |
| Q99LR1 | ABD12_MOUSE | 0.00000 | 0.00000 | 0.00000 | 0.00000 | 0.00000 | 0.00000 | 0.00321 | 0.00215 | 0.00566 | 0.00394 | 0.00667 | 0.00475 |
| Q99LX0 | PARK7_MOUSE | 0.03186 | 0.03395 | 0.02924 | 0.04739 | 0.03986 | 0.05993 | 0.04693 | 0.04022 | 0.04425 | 0.04087 | 0.05809 | 0.04193 |
| Q99LY9 | NDU5_MOUSE  | 0.03080 | 0.01756 | 0.03745 | 0.02743 | 0.02741 | 0.02373 | 0.00115 | 0.00979 | 0.00421 | 0.00904 | 0.00591 | 0.00452 |
| Q99M01 | SYFM_MOUSE  | 0.00000 | 0.00000 | 0.00000 | 0.00000 | 0.00000 | 0.00000 | 0.00000 | 0.00000 | 0.00000 | 0.00000 | 0.00000 | 0.00000 |
| Q99M08 | CD003_MOUSE | 0.00000 | 0.00000 | 0.00000 | 0.00000 | 0.00000 | 0.00000 | 0.00000 | 0.00344 | 0.00000 | 0.00138 | 0.00000 | 0.00087 |
| Q99M28 | RNPS1_MOUSE | 0.00000 | 0.00000 | 0.00000 | 0.00000 | 0.00000 | 0.00000 | 0.00073 | 0.00388 | 0.00873 | 0.01247 | 0.01149 | 0.01091 |
| Q99M51 | NCK1_MOUSE  | 0.00000 | 0.00000 | 0.00000 | 0.00000 | 0.00000 | 0.00000 | 0.00335 | 0.00578 | 0.00472 | 0.00328 | 0.00097 | 0.00387 |
| Q99M87 | DNJA3_MOUSE | 0.00635 | 0.01066 | 0.00482 | 0.00713 | 0.00760 | 0.00555 | 0.00526 | 0.00641 | 0.00048 | 0.00184 | 0.00171 | 0.00114 |
| Q99MK8 | ARBK1_MOUSE | 0.00000 | 0.00000 | 0.00000 | 0.00000 | 0.00000 | 0.00000 | 0.00120 | 0.00237 | 0.00415 | 0.00598 | 0.00379 | 0.00496 |
| Q99MN1 | SYK_MOUSE   | 0.00479 | 0.00616 | 0.00680 | 0.00537 | 0.00499 | 0.00487 | 0.00989 | 0.01065 | 0.01700 | 0.01206 | 0.01413 | 0.01015 |
| Q99MN9 | PCCB_MOUSE  | 0.06117 | 0.08099 | 0.07435 | 0.07723 | 0.07722 | 0.08154 | 0.01928 | 0.03055 | 0.01238 | 0.01481 | 0.01417 | 0.01956 |
| Q99MQ4 | ASPN_MOUSE  | 0.00000 | 0.00000 | 0.00000 | 0.00000 | 0.00000 | 0.00000 | 0.03343 | 0.00859 | 0.01246 | 0.00897 | 0.01234 | 0.00787 |
| Q99MR6 | SRRT_MOUSE  | 0.00000 | 0.00000 | 0.00000 | 0.00000 | 0.00000 | 0.00000 | 0.00490 | 0.00400 | 0.00636 | 0.00639 | 0.00723 | 0.00713 |
| Q99MR8 | MCCA_MOUSE  | 0.10680 | 0.11618 | 0.09852 | 0.10600 | 0.13088 | 0.09927 | 0.01715 | 0.01255 | 0.01293 | 0.01014 | 0.01311 | 0.01163 |
| Q99MV7 | RNF17_MOUSE | 0.00000 | 0.00000 | 0.00000 | 0.00000 | 0.00000 | 0.00000 | 0.00000 | 0.01698 | 0.00000 | 0.00000 | 0.01768 | 0.01739 |



|        |             |         |         |         |         |         |         |         |         |         |         |         |         |
|--------|-------------|---------|---------|---------|---------|---------|---------|---------|---------|---------|---------|---------|---------|
| Q99MZ6 | MYO7B_MOUSE | 0.00000 | 0.00000 | 0.00000 | 0.00000 | 0.00000 | 0.00000 | 0.00000 | 0.00000 | 0.00000 | 0.00000 | 0.00000 | 0.00000 |
| Q99MZ7 | PECR_MOUSE  | 0.00000 | 0.00000 | 0.00000 | 0.00000 | 0.00000 | 0.00000 | 0.00000 | 0.00000 | 0.00000 | 0.00000 | 0.00000 | 0.00004 |
| Q99N05 | M4A4D_MOUSE | 0.00000 | 0.00000 | 0.00000 | 0.00000 | 0.00000 | 0.00000 | 0.00000 | 0.00000 | 0.00000 | 0.00000 | 0.00000 | 0.00000 |
| Q99N93 | RM16_MOUSE  | 0.00000 | 0.00000 | 0.00000 | 0.00000 | 0.00000 | 0.00000 | 0.00000 | 0.00000 | 0.00000 | 0.00000 | 0.00000 | 0.00000 |
| Q99NB1 | ACS2L_MOUSE | 0.12419 | 0.13908 | 0.14731 | 0.11604 | 0.13554 | 0.15168 | 0.03001 | 0.02131 | 0.01504 | 0.01353 | 0.02248 | 0.02209 |
| Q99NB9 | SF3B1_MOUSE | 0.00000 | 0.00000 | 0.00000 | 0.00000 | 0.00000 | 0.00000 | 0.01199 | 0.00806 | 0.01241 | 0.01063 | 0.01332 | 0.01247 |
| Q99NH0 | ANR17_MOUSE | 0.00000 | 0.00000 | 0.00000 | 0.00000 | 0.00000 | 0.00000 | 0.00000 | 0.00051 | 0.00469 | 0.00136 | 0.00457 | 0.00088 |
| Q99P31 | HPBP1_MOUSE | 0.00000 | 0.00000 | 0.00000 | 0.00000 | 0.00000 | 0.00000 | 0.00174 | 0.00183 | 0.00498 | 0.00266 | 0.00293 | 0.00379 |
| Q99P58 | RB27B_MOUSE | 0.00000 | 0.00000 | 0.00000 | 0.00000 | 0.00000 | 0.00000 | 0.00000 | 0.00000 | 0.00368 | 0.00494 | 0.00000 | 0.00524 |
| Q99P72 | RTN4_MOUSE  | 0.00379 | 0.00381 | 0.00614 | 0.00472 | 0.00376 | 0.00187 | 0.06898 | 0.07049 | 0.10417 | 0.09035 | 0.08286 | 0.08266 |
| Q99P88 | NU155_MOUSE | 0.00000 | 0.00000 | 0.00000 | 0.00000 | 0.00000 | 0.00000 | 0.00473 | 0.00431 | 0.00786 | 0.00569 | 0.00826 | 0.00522 |
| Q99PG0 | AAAD_MOUSE  | 0.00000 | 0.00000 | 0.00000 | 0.00000 | 0.00000 | 0.00000 | 0.00000 | 0.00000 | 0.00000 | 0.00000 | 0.00000 | 0.00000 |
| Q99PG2 | OGFR_MOUSE  | 0.00000 | 0.00000 | 0.00000 | 0.00000 | 0.00000 | 0.00000 | 0.00000 | 0.00087 | 0.00791 | 0.01124 | 0.00390 | 0.00334 |
| Q99PL5 | RRBP1_MOUSE | 0.00179 | 0.00163 | 0.00159 | 0.00159 | 0.00148 | 0.00161 | 0.01397 | 0.01860 | 0.02624 | 0.01929 | 0.01590 | 0.01846 |
| Q99PL6 | UBXN6_MOUSE | 0.00000 | 0.00000 | 0.00000 | 0.00000 | 0.00000 | 0.00000 | 0.00326 | 0.00280 | 0.00212 | 0.00397 | 0.00440 | 0.00547 |
| Q99PP9 | TRI16_MOUSE | 0.00000 | 0.00000 | 0.00000 | 0.00000 | 0.00000 | 0.00000 | 0.00370 | 0.01465 | 0.01532 | 0.01751 | 0.00890 | 0.01249 |
| Q99PR8 | HSPB2_MOUSE | 0.00000 | 0.00000 | 0.00000 | 0.00000 | 0.00000 | 0.00000 | 0.00177 | 0.00000 | 0.00000 | 0.00000 | 0.00000 | 0.00000 |
| Q99PT1 | GDIR1_MOUSE | 0.05888 | 0.04831 | 0.05362 | 0.03437 | 0.05172 | 0.04672 | 0.24083 | 0.28876 | 0.31029 | 0.28077 | 0.28902 | 0.27792 |
| Q99PV0 | PRP8_MOUSE  | 0.00345 | 0.00133 | 0.00303 | 0.00438 | 0.00270 | 0.00033 | 0.00870 | 0.00761 | 0.00862 | 0.00742 | 0.00805 | 0.00611 |
| Q99PW4 | PRPK_MOUSE  | 0.00000 | 0.00000 | 0.00000 | 0.00000 | 0.00000 | 0.00000 | 0.00000 | 0.00417 | 0.00000 | 0.00000 | 0.00000 | 0.00000 |
| Q9CPP6 | NDUA5_MOUSE | 0.00000 | 0.00000 | 0.00000 | 0.00000 | 0.00000 | 0.00000 | 0.02050 | 0.00780 | 0.01328 | 0.01212 | 0.01230 | 0.01022 |
| Q9CPQ1 | COX6C_MOUSE | 0.00000 | 0.00000 | 0.00000 | 0.00000 | 0.00000 | 0.00000 | 0.01165 | 0.00514 | 0.01338 | 0.00806 | 0.01047 | 0.00546 |
| Q9CPQ3 | TOM22_MOUSE | 0.00000 | 0.00000 | 0.00000 | 0.00000 | 0.00000 | 0.00000 | 0.00401 | 0.00566 | 0.01339 | 0.00690 | 0.01273 | 0.00969 |
| Q9CPQ8 | ATP5L_MOUSE | 0.17967 | 0.13923 | 0.14406 | 0.11605 | 0.16054 | 0.13589 | 0.14690 | 0.09764 | 0.11686 | 0.09043 | 0.09149 | 0.11974 |
| Q9CPR4 | RL17_MOUSE  | 0.00577 | 0.00687 | 0.00421 | 0.00780 | 0.00525 | 0.00147 | 0.04359 | 0.03877 | 0.04156 | 0.04357 | 0.04124 | 0.03668 |
| Q9CPR5 | RM15_MOUSE  | 0.00000 | 0.00000 | 0.00000 | 0.00000 | 0.00000 | 0.00000 | 0.00000 | 0.00195 | 0.00277 | 0.00000 | 0.00189 | 0.00263 |
| Q9CPT3 | NANP_MOUSE  | 0.00000 | 0.00000 | 0.00000 | 0.00000 | 0.00000 | 0.00000 | 0.00000 | 0.00088 | 0.00075 | 0.00058 | 0.00194 | 0.00043 |
| Q9CPU0 | LGUL_MOUSE  | 0.00000 | 0.00000 | 0.00000 | 0.00000 | 0.00000 | 0.00000 | 0.01902 | 0.01641 | 0.01109 | 0.01767 | 0.01465 | 0.01364 |
| Q9CPU2 | NDUB2_MOUSE | 0.00000 | 0.00000 | 0.00000 | 0.00000 | 0.00000 | 0.00000 | 0.00000 | 0.00000 | 0.00000 | 0.00000 | 0.00000 | 0.00000 |
| Q9CPU4 | MGST3_MOUSE | 0.05588 | 0.06112 | 0.10665 | 0.08646 | 0.04866 | 0.08865 | 0.00857 | 0.02000 | 0.01693 | 0.01669 | 0.00657 | 0.01700 |
| Q9CPV4 | GLOD4_MOUSE | 0.00228 | 0.00144 | 0.00228 | 0.00286 | 0.00160 | 0.00331 | 0.02029 | 0.02287 | 0.03212 | 0.02318 | 0.03624 | 0.03140 |
| Q9CPW4 | ARPC5_MOUSE | 0.00000 | 0.00000 | 0.00000 | 0.00000 | 0.00000 | 0.00000 | 0.01330 | 0.02488 | 0.02610 | 0.02167 | 0.02953 | 0.02566 |
| Q9CPX6 | ATG3_MOUSE  | 0.00000 | 0.00000 | 0.00000 | 0.00000 | 0.00000 | 0.00000 | 0.01444 | 0.01581 | 0.01779 | 0.01192 | 0.00824 | 0.01575 |
| Q9CPX8 | QCR10_MOUSE | 0.00000 | 0.00000 | 0.00000 | 0.00000 | 0.00000 | 0.00000 | 0.00057 | 0.00000 | 0.00013 | 0.00016 | 0.00023 | 0.00000 |



|        |             |         |         |         |         |         |         |         |         |         |         |         |         |
|--------|-------------|---------|---------|---------|---------|---------|---------|---------|---------|---------|---------|---------|---------|
| Q9CQH3 | NDUB5_MOUSE | 0.00000 | 0.00000 | 0.00000 | 0.00000 | 0.00000 | 0.00000 | 0.01582 | 0.01183 | 0.00763 | 0.01033 | 0.00646 | 0.01100 |
| Q9CQH7 | BT3L4_MOUSE | 0.00000 | 0.00000 | 0.00000 | 0.00000 | 0.00000 | 0.00000 | 0.00219 | 0.00726 | 0.00875 | 0.00869 | 0.01031 | 0.00935 |
| Q9CQI3 | GMFB_MOUSE  | 0.00000 | 0.00000 | 0.00000 | 0.00000 | 0.00000 | 0.00000 | 0.01991 | 0.02716 | 0.01639 | 0.02040 | 0.01043 | 0.01884 |
| Q9CQI6 | COTL1_MOUSE | 0.00000 | 0.00000 | 0.00000 | 0.00000 | 0.00000 | 0.00000 | 0.01819 | 0.01872 | 0.01846 | 0.02278 | 0.01706 | 0.02498 |
| Q9CQI7 | RU2B_MOUSE  | 0.00000 | 0.00000 | 0.00000 | 0.00000 | 0.00000 | 0.00000 | 0.00000 | 0.00000 | 0.00000 | 0.00376 | 0.00477 | 0.00389 |
| Q9CQJ6 | DENR_MOUSE  | 0.01353 | 0.00906 | 0.00941 | 0.00600 | 0.00788 | 0.00312 | 0.00480 | 0.00580 | 0.00609 | 0.00639 | 0.00644 | 0.00544 |
| Q9CQJ8 | NDUB9_MOUSE | 0.17942 | 0.07592 | 0.19687 | 0.15037 | 0.09789 | 0.09606 | 0.01883 | 0.00653 | 0.00883 | 0.00801 | 0.00349 | 0.00382 |
| Q9CQM5 | TXD17_MOUSE | 0.00459 | 0.00467 | 0.00309 | 0.00495 | 0.00379 | 0.00295 | 0.00844 | 0.00704 | 0.00201 | 0.00493 | 0.00000 | 0.00151 |
| Q9CQM9 | GLRX3_MOUSE | 0.00937 | 0.00900 | 0.01338 | 0.00709 | 0.00858 | 0.00741 | 0.01171 | 0.00732 | 0.01197 | 0.00869 | 0.01311 | 0.00760 |
| Q9CQN1 | TRAP1_MOUSE | 0.04699 | 0.03578 | 0.03161 | 0.03263 | 0.03562 | 0.04514 | 0.01157 | 0.00774 | 0.01681 | 0.01071 | 0.01618 | 0.01128 |
| Q9CQN6 | TM14C_MOUSE | 0.00000 | 0.00000 | 0.00000 | 0.00000 | 0.00000 | 0.00000 | 0.00628 | 0.00804 | 0.00904 | 0.00759 | 0.00614 | 0.00790 |
| Q9CQP2 | TPPC2_MOUSE | 0.00000 | 0.00000 | 0.00000 | 0.00000 | 0.00000 | 0.00000 | 0.00000 | 0.00562 | 0.00393 | 0.00197 | 0.00515 | 0.00305 |
| Q9CQQ7 | AT5F1_MOUSE | 0.11157 | 0.03976 | 0.12872 | 0.10198 | 0.08511 | 0.04831 | 0.03404 | 0.03271 | 0.04224 | 0.03683 | 0.03769 | 0.02818 |
| Q9CQR2 | RS21_MOUSE  | 0.00000 | 0.00000 | 0.00000 | 0.00000 | 0.00000 | 0.00000 | 0.01448 | 0.01147 | 0.00819 | 0.01188 | 0.00588 | 0.01495 |
| Q9CQR4 | ACO13_MOUSE | 0.00324 | 0.00261 | 0.00317 | 0.00239 | 0.00223 | 0.00323 | 0.00245 | 0.00770 | 0.00261 | 0.00227 | 0.00468 | 0.00132 |
| Q9CQR6 | PPP6_MOUSE  | 0.00000 | 0.00000 | 0.00000 | 0.00000 | 0.00000 | 0.00000 | 0.01366 | 0.01479 | 0.01864 | 0.01464 | 0.01653 | 0.02002 |
| Q9CQS8 | SC61B_MOUSE | 0.00000 | 0.00000 | 0.00000 | 0.00000 | 0.00000 | 0.00000 | 0.00000 | 0.00949 | 0.02093 | 0.01436 | 0.00860 | 0.00775 |
| Q9CQU3 | RER1_MOUSE  | 0.00000 | 0.00000 | 0.00000 | 0.00000 | 0.00000 | 0.00000 | 0.01664 | 0.01456 | 0.01803 | 0.01609 | 0.01535 | 0.01514 |
| Q9CQV8 | 1433B_MOUSE | 0.00000 | 0.00000 | 0.00000 | 0.00000 | 0.00000 | 0.00000 | 0.08329 | 0.14996 | 0.17774 | 0.17218 | 0.09412 | 0.13492 |
| Q9CQW1 | YKT6_MOUSE  | 0.00000 | 0.00000 | 0.00000 | 0.00000 | 0.00000 | 0.00000 | 0.00659 | 0.00858 | 0.00813 | 0.00784 | 0.00750 | 0.00603 |
| Q9CQW9 | IFM3_MOUSE  | 0.00000 | 0.00000 | 0.00000 | 0.00000 | 0.00000 | 0.00000 | 0.01341 | 0.01349 | 0.02398 | 0.01434 | 0.02527 | 0.00952 |
| Q9CQX2 | CYB5B_MOUSE | 0.02500 | 0.01330 | 0.01417 | 0.01751 | 0.01004 | 0.01099 | 0.00266 | 0.01479 | 0.02023 | 0.01662 | 0.01617 | 0.02416 |
| Q9CQX8 | RT36_MOUSE  | 0.00290 | 0.00175 | 0.00436 | 0.00458 | 0.00382 | 0.00084 | 0.00000 | 0.00532 | 0.00000 | 0.00124 | 0.00000 | 0.00161 |
| Q9CQY5 | MAGT1_MOUSE | 0.00000 | 0.00000 | 0.00000 | 0.00000 | 0.00000 | 0.00000 | 0.00000 | 0.00661 | 0.00253 | 0.00763 | 0.00384 | 0.00733 |
| Q9CQY6 | UQCC2_MOUSE | 0.00000 | 0.00000 | 0.00000 | 0.00000 | 0.00000 | 0.00000 | 0.00000 | 0.00580 | 0.00000 | 0.00000 | 0.00000 | 0.00000 |
| Q9CQZ1 | HSBP1_MOUSE | 0.00000 | 0.00000 | 0.00000 | 0.00000 | 0.00000 | 0.00000 | 0.00041 | 0.01032 | 0.00043 | 0.00618 | 0.00557 | 0.00527 |
| Q9CQZ5 | NDUA6_MOUSE | 0.06017 | 0.02102 | 0.05045 | 0.05064 | 0.05505 | 0.02731 | 0.00000 | 0.00356 | 0.00483 | 0.00312 | 0.00159 | 0.00164 |
| Q9CQZ6 | NDUB3_MOUSE | 0.00000 | 0.00000 | 0.00000 | 0.00000 | 0.00000 | 0.00000 | 0.00000 | 0.00275 | 0.00265 | 0.00458 | 0.00206 | 0.00111 |
| Q9CR00 | PSMD9_MOUSE | 0.00000 | 0.00000 | 0.00000 | 0.00000 | 0.00000 | 0.00000 | 0.00045 | 0.00239 | 0.00311 | 0.00332 | 0.00000 | 0.00287 |
| Q9CR09 | UFC1_MOUSE  | 0.00000 | 0.00000 | 0.00000 | 0.00000 | 0.00000 | 0.00000 | 0.00000 | 0.00000 | 0.00272 | 0.00371 | 0.00000 | 0.00349 |
| Q9CR16 | PPID_MOUSE  | 0.00000 | 0.00000 | 0.00000 | 0.00000 | 0.00000 | 0.00000 | 0.02383 | 0.01629 | 0.01506 | 0.01390 | 0.01276 | 0.01916 |
| Q9CR20 | IR3IP_MOUSE | 0.00000 | 0.00000 | 0.00000 | 0.00000 | 0.00000 | 0.00000 | 0.01771 | 0.01253 | 0.01091 | 0.01280 | 0.00741 | 0.01439 |
| Q9CR21 | ACPM_MOUSE  | 0.13119 | 0.13550 | 0.20791 | 0.16282 | 0.17308 | 0.11530 | 0.00000 | 0.00628 | 0.00498 | 0.00412 | 0.00103 | 0.00145 |
| Q9CR26 | VTA1_MOUSE  | 0.00000 | 0.00000 | 0.00000 | 0.00000 | 0.00000 | 0.00000 | 0.01306 | 0.01087 | 0.02221 | 0.01264 | 0.01960 | 0.01450 |

|        |             |         |         |         |         |         |         |         |         |         |         |         |         |
|--------|-------------|---------|---------|---------|---------|---------|---------|---------|---------|---------|---------|---------|---------|
| Q9CR29 | CCD43_MOUSE | 0.00000 | 0.00000 | 0.00000 | 0.00000 | 0.00000 | 0.00000 | 0.00000 | 0.00000 | 0.00244 | 0.00000 | 0.00201 | 0.00327 |
| Q9CR39 | WIPI3_MOUSE | 0.00000 | 0.00000 | 0.00000 | 0.00000 | 0.00000 | 0.00000 | 0.00000 | 0.00000 | 0.00000 | 0.00000 | 0.00000 | 0.00000 |
| Q9CR41 | HYPK_MOUSE  | 0.00000 | 0.00000 | 0.00000 | 0.00000 | 0.00000 | 0.00000 | 0.00000 | 0.00649 | 0.00088 | 0.00193 | 0.00308 | 0.00368 |
| Q9CR51 | VATG1_MOUSE | 0.00000 | 0.00000 | 0.00000 | 0.00000 | 0.00000 | 0.00000 | 0.03282 | 0.02556 | 0.02119 | 0.02383 | 0.02182 | 0.02369 |
| Q9CR57 | RL14_MOUSE  | 0.00000 | 0.00000 | 0.00000 | 0.00000 | 0.00000 | 0.00000 | 0.01664 | 0.04537 | 0.02076 | 0.04117 | 0.02604 | 0.03789 |
| Q9CR61 | NDUB7_MOUSE | 0.02456 | 0.01781 | 0.01729 | 0.06027 | 0.01121 | 0.05897 | 0.00834 | 0.00569 | 0.00237 | 0.00596 | 0.00521 | 0.00654 |
| Q9CR62 | M2OM_MOUSE  | 0.06939 | 0.06039 | 0.08517 | 0.05650 | 0.07124 | 0.06103 | 0.03612 | 0.04323 | 0.04264 | 0.03648 | 0.03539 | 0.03941 |
| Q9CR67 | TMM33_MOUSE | 0.00000 | 0.00000 | 0.00000 | 0.00000 | 0.00000 | 0.00000 | 0.00041 | 0.00372 | 0.00187 | 0.00199 | 0.00130 | 0.00592 |
| Q9CR68 | UCRI_MOUSE  | 0.06897 | 0.11890 | 0.05427 | 0.11307 | 0.08393 | 0.14925 | 0.03908 | 0.03944 | 0.03259 | 0.03116 | 0.02408 | 0.02966 |
| Q9CR86 | CHSP1_MOUSE | 0.00000 | 0.00000 | 0.00000 | 0.00000 | 0.00000 | 0.00000 | 0.00250 | 0.00705 | 0.00635 | 0.01028 | 0.01486 | 0.00621 |
| Q9CR95 | NECP1_MOUSE | 0.00000 | 0.00000 | 0.00000 | 0.00000 | 0.00000 | 0.00000 | 0.01324 | 0.00524 | 0.00812 | 0.00784 | 0.00832 | 0.00369 |
| Q9CRA0 | NAR4_MOUSE  | 0.00000 | 0.00000 | 0.00000 | 0.00000 | 0.00000 | 0.00000 | 0.00000 | 0.00211 | 0.00369 | 0.00000 | 0.00094 | 0.00072 |
| Q9CRA7 | ATP5S_MOUSE | 0.00000 | 0.00000 | 0.00000 | 0.00000 | 0.00000 | 0.00000 | 0.00000 | 0.00000 | 0.00000 | 0.00000 | 0.00000 | 0.00000 |
| Q9CRB2 | NHP2_MOUSE  | 0.00000 | 0.00000 | 0.00000 | 0.00000 | 0.00000 | 0.00000 | 0.00000 | 0.00000 | 0.00000 | 0.00000 | 0.00000 | 0.00000 |
| Q9CRB6 | TPPP3_MOUSE | 0.00000 | 0.00000 | 0.00000 | 0.00000 | 0.00000 | 0.00000 | 0.16881 | 0.17261 | 0.13995 | 0.13314 | 0.13282 | 0.14410 |
| Q9CRB8 | MTFP1_MOUSE | 0.00064 | 0.00056 | 0.00075 | 0.00130 | 0.00061 | 0.00079 | 0.00260 | 0.00000 | 0.00000 | 0.00000 | 0.00000 | 0.00000 |
| Q9CRB9 | MIC19_MOUSE | 0.12889 | 0.10118 | 0.13418 | 0.10586 | 0.15580 | 0.14641 | 0.01583 | 0.02739 | 0.02424 | 0.02627 | 0.01628 | 0.02888 |
| Q9CRC9 | GNPI2_MOUSE | 0.00000 | 0.00000 | 0.00000 | 0.00000 | 0.00000 | 0.00000 | 0.00431 | 0.00652 | 0.00838 | 0.00897 | 0.01158 | 0.00549 |
| Q9CRD0 | OCAD1_MOUSE | 0.00396 | 0.00430 | 0.00229 | 0.00268 | 0.00316 | 0.00252 | 0.01850 | 0.01736 | 0.01308 | 0.01067 | 0.01359 | 0.01620 |
| Q9CRD2 | EMC2_MOUSE  | 0.00000 | 0.00000 | 0.00000 | 0.00000 | 0.00000 | 0.00000 | 0.00433 | 0.00732 | 0.00454 | 0.00453 | 0.00181 | 0.00212 |
| Q9CRY7 | GDPD1_MOUSE | 0.00000 | 0.00000 | 0.00000 | 0.00000 | 0.00000 | 0.00000 | 0.01704 | 0.00990 | 0.01175 | 0.01214 | 0.01179 | 0.01566 |
| Q9CS42 | PRPS2_MOUSE | 0.00000 | 0.00000 | 0.00000 | 0.00000 | 0.00000 | 0.00000 | 0.02013 | 0.02620 | 0.03155 | 0.02874 | 0.02522 | 0.02662 |
| Q9CSN1 | SNW1_MOUSE  | 0.00000 | 0.00000 | 0.00000 | 0.00000 | 0.00000 | 0.00000 | 0.00609 | 0.00758 | 0.00416 | 0.00519 | 0.00922 | 0.00570 |
| Q9CSU0 | RPR1B_MOUSE | 0.00000 | 0.00000 | 0.00000 | 0.00000 | 0.00000 | 0.00000 | 0.00563 | 0.00424 | 0.00914 | 0.00794 | 0.00930 | 0.01019 |
| Q9CT10 | RANB3_MOUSE | 0.00000 | 0.00000 | 0.00000 | 0.00000 | 0.00000 | 0.00000 | 0.00000 | 0.00184 | 0.00457 | 0.00461 | 0.01018 | 0.00636 |
| Q9CU62 | SMC1A_MOUSE | 0.00000 | 0.00000 | 0.00000 | 0.00000 | 0.00000 | 0.00000 | 0.01721 | 0.01013 | 0.01418 | 0.00871 | 0.01276 | 0.00876 |
| Q9CVB6 | ARPC2_MOUSE | 0.00000 | 0.00000 | 0.00000 | 0.00000 | 0.00000 | 0.00000 | 0.01007 | 0.02506 | 0.02942 | 0.02800 | 0.02497 | 0.02049 |
| Q9CVD2 | ATX3_MOUSE  | 0.00000 | 0.00000 | 0.00000 | 0.00000 | 0.00000 | 0.00000 | 0.00000 | 0.00128 | 0.00000 | 0.00000 | 0.00099 | 0.00083 |
| Q9CW03 | SMC3_MOUSE  | 0.00000 | 0.00000 | 0.00000 | 0.00000 | 0.00000 | 0.00000 | 0.00878 | 0.02101 | 0.01981 | 0.01394 | 0.01444 | 0.01840 |
| Q9CW46 | RAVR1_MOUSE | 0.00000 | 0.00000 | 0.00000 | 0.00000 | 0.00000 | 0.00000 | 0.00230 | 0.00129 | 0.00448 | 0.00262 | 0.00505 | 0.00520 |
| Q9CWD8 | NUBPL_MOUSE | 0.00092 | 0.00111 | 0.00174 | 0.00136 | 0.00200 | 0.00155 | 0.00122 | 0.00178 | 0.00064 | 0.00000 | 0.00000 | 0.00170 |
| Q9CWE0 | MFR1L_MOUSE | 0.00000 | 0.00000 | 0.00000 | 0.00000 | 0.00000 | 0.00000 | 0.01914 | 0.00344 | 0.00590 | 0.00447 | 0.00474 | 0.00370 |
| Q9CWJ9 | PUR9_MOUSE  | 0.01579 | 0.01695 | 0.01661 | 0.01110 | 0.01185 | 0.01252 | 0.03393 | 0.01825 | 0.03140 | 0.02640 | 0.03722 | 0.03034 |
| Q9CWK8 | SNX2_MOUSE  | 0.00000 | 0.00000 | 0.00000 | 0.00000 | 0.00000 | 0.00000 | 0.02349 | 0.02556 | 0.03398 | 0.03233 | 0.02146 | 0.03220 |

|        |             |         |         |         |         |         |         |         |         |         |         |         |         |
|--------|-------------|---------|---------|---------|---------|---------|---------|---------|---------|---------|---------|---------|---------|
| Q9CWL8 | CTBL1_MOUSE | 0.00000 | 0.00000 | 0.00000 | 0.00000 | 0.00000 | 0.00000 | 0.00761 | 0.00064 | 0.00279 | 0.00162 | 0.00086 | 0.00201 |
| Q9CWP6 | MSPD2_MOUSE | 0.00000 | 0.00000 | 0.00000 | 0.00000 | 0.00000 | 0.00000 | 0.00509 | 0.00721 | 0.00669 | 0.00874 | 0.00836 | 0.00833 |
| Q9CWS0 | DDAH1_MOUSE | 0.00000 | 0.00000 | 0.00000 | 0.00000 | 0.00000 | 0.00000 | 0.01540 | 0.01462 | 0.01946 | 0.01585 | 0.01250 | 0.01420 |
| Q9CWU6 | UQCC1_MOUSE | 0.00000 | 0.00000 | 0.00000 | 0.00000 | 0.00000 | 0.00000 | 0.00626 | 0.00331 | 0.00535 | 0.00436 | 0.00600 | 0.00436 |
| Q9CWW6 | PIN4_MOUSE  | 0.00000 | 0.00000 | 0.00000 | 0.00000 | 0.00000 | 0.00000 | 0.00457 | 0.00000 | 0.00663 | 0.00601 | 0.00376 | 0.00293 |
| Q9CWZ3 | RBM8A_MOUSE | 0.00000 | 0.00000 | 0.00000 | 0.00000 | 0.00000 | 0.00000 | 0.00159 | 0.00826 | 0.00635 | 0.00987 | 0.01068 | 0.00722 |
| Q9CWZ7 | SNAG_MOUSE  | 0.00000 | 0.00000 | 0.00000 | 0.00000 | 0.00000 | 0.00000 | 0.00837 | 0.00697 | 0.00735 | 0.00564 | 0.00778 | 0.00439 |
| Q9CX00 | IST1_MOUSE  | 0.00000 | 0.00000 | 0.00000 | 0.00000 | 0.00000 | 0.00000 | 0.00000 | 0.00360 | 0.00530 | 0.00415 | 0.00214 | 0.00202 |
| Q9CX13 | CNIH4_MOUSE | 0.00000 | 0.00000 | 0.00000 | 0.00000 | 0.00000 | 0.00000 | 0.00076 | 0.00677 | 0.00000 | 0.00152 | 0.00056 | 0.00267 |
| Q9CX34 | SGT1_MOUSE  | 0.00091 | 0.00136 | 0.00167 | 0.00124 | 0.00076 | 0.00104 | 0.00611 | 0.00823 | 0.01013 | 0.01072 | 0.00863 | 0.01110 |
| Q9CX56 | PSMD8_MOUSE | 0.00000 | 0.00000 | 0.00000 | 0.00000 | 0.00000 | 0.00000 | 0.00455 | 0.00666 | 0.01069 | 0.01002 | 0.00977 | 0.00763 |
| Q9CX60 | LBH_MOUSE   | 0.00000 | 0.00000 | 0.00000 | 0.00000 | 0.00000 | 0.00000 | 0.00291 | 0.00102 | 0.01170 | 0.00029 | 0.01230 | 0.01352 |
| Q9CX86 | ROA0_MOUSE  | 0.00000 | 0.00000 | 0.00000 | 0.00000 | 0.00000 | 0.00000 | 0.03348 | 0.03557 | 0.02583 | 0.03056 | 0.02754 | 0.03182 |
| Q9CX99 | GRAP_MOUSE  | 0.00000 | 0.00000 | 0.00000 | 0.00000 | 0.00000 | 0.00000 | 0.00000 | 0.00303 | 0.00413 | 0.00000 | 0.00446 | 0.00000 |
| Q9CXA2 | T3HPD_MOUSE | 0.00000 | 0.00000 | 0.00000 | 0.00000 | 0.00000 | 0.00000 | 0.00140 | 0.00330 | 0.00122 | 0.00290 | 0.00331 | 0.00186 |
| Q9CXD6 | MCUR1_MOUSE | 0.00000 | 0.00000 | 0.00000 | 0.00000 | 0.00000 | 0.00000 | 0.00000 | 0.00000 | 0.00000 | 0.00000 | 0.00000 | 0.00000 |
| Q9CXE7 | TMED5_MOUSE | 0.00000 | 0.00000 | 0.00000 | 0.00000 | 0.00000 | 0.00000 | 0.01100 | 0.01046 | 0.00996 | 0.00945 | 0.00582 | 0.01049 |
| Q9CXI0 | COQ5_MOUSE  | 0.01054 | 0.01650 | 0.02201 | 0.01294 | 0.01529 | 0.01268 | 0.00000 | 0.00146 | 0.00064 | 0.00000 | 0.00000 | 0.00000 |
| Q9CXJ4 | MITOS_MOUSE | 0.00000 | 0.00000 | 0.00000 | 0.00000 | 0.00000 | 0.00000 | 0.00000 | 0.00000 | 0.00000 | 0.00000 | 0.00000 | 0.00000 |
| Q9CXR1 | DHRS7_MOUSE | 0.00000 | 0.00000 | 0.00000 | 0.00000 | 0.00000 | 0.00000 | 0.01697 | 0.00681 | 0.00908 | 0.00579 | 0.01067 | 0.00907 |
| Q9CXS4 | CENPV_MOUSE | 0.00292 | 0.00524 | 0.00133 | 0.00350 | 0.00237 | 0.00278 | 0.01635 | 0.01512 | 0.01694 | 0.01457 | 0.01507 | 0.01547 |
| Q9CXT8 | MPPB_MOUSE  | 0.00000 | 0.00000 | 0.00000 | 0.00000 | 0.00000 | 0.00000 | 0.00560 | 0.00357 | 0.00000 | 0.00815 | 0.00000 | 0.00000 |
| Q9CXW3 | CYBP_MOUSE  | 0.00000 | 0.00000 | 0.00000 | 0.00000 | 0.00000 | 0.00000 | 0.00473 | 0.01334 | 0.01315 | 0.01077 | 0.00885 | 0.00997 |
| Q9CXW4 | RL11_MOUSE  | 0.00000 | 0.00000 | 0.00000 | 0.00000 | 0.00000 | 0.00000 | 0.03426 | 0.04395 | 0.03188 | 0.03649 | 0.02595 | 0.04016 |
| Q9CXY6 | ILF2_MOUSE  | 0.00000 | 0.00000 | 0.00000 | 0.00000 | 0.00000 | 0.00000 | 0.01492 | 0.02148 | 0.02756 | 0.02334 | 0.01586 | 0.02224 |
| Q9CXY9 | GPI8_MOUSE  | 0.00000 | 0.00000 | 0.00000 | 0.00000 | 0.00000 | 0.00000 | 0.00000 | 0.00378 | 0.00000 | 0.00000 | 0.00027 | 0.00000 |
| Q9CXZ1 | NDUS4_MOUSE | 0.00000 | 0.00000 | 0.00000 | 0.00000 | 0.00000 | 0.00000 | 0.00000 | 0.00678 | 0.00208 | 0.00277 | 0.00186 | 0.00595 |
| Q9CY27 | TECR_MOUSE  | 0.00000 | 0.00000 | 0.00000 | 0.00000 | 0.00000 | 0.00000 | 0.01793 | 0.01996 | 0.02636 | 0.02092 | 0.01772 | 0.01807 |
| Q9CY50 | SSRA_MOUSE  | 0.00000 | 0.00000 | 0.00000 | 0.00000 | 0.00000 | 0.00000 | 0.00308 | 0.00093 | 0.00697 | 0.00566 | 0.00628 | 0.00820 |
| Q9CY57 | CHTOP_MOUSE | 0.00000 | 0.00000 | 0.00000 | 0.00000 | 0.00000 | 0.00000 | 0.00000 | 0.00492 | 0.00384 | 0.00221 | 0.00194 | 0.00371 |
| Q9CY58 | PAIRB_MOUSE | 0.00596 | 0.01531 | 0.01032 | 0.01040 | 0.01019 | 0.01127 | 0.01420 | 0.01948 | 0.02505 | 0.01902 | 0.02097 | 0.02579 |
| Q9CY62 | RN181_MOUSE | 0.00000 | 0.00000 | 0.00000 | 0.00000 | 0.00000 | 0.00000 | 0.00000 | 0.00000 | 0.00108 | 0.00000 | 0.00000 | 0.00051 |
| Q9CY64 | BIEA_MOUSE  | 0.00000 | 0.00000 | 0.00000 | 0.00000 | 0.00000 | 0.00000 | 0.01423 | 0.01070 | 0.02058 | 0.01275 | 0.01845 | 0.01686 |
| Q9CY66 | GAR1_MOUSE  | 0.00000 | 0.00000 | 0.00000 | 0.00000 | 0.00000 | 0.00000 | 0.00000 | 0.00136 | 0.00229 | 0.00109 | 0.00100 | 0.00102 |



|        |             |         |         |         |         |         |         |         |         |         |         |         |         |
|--------|-------------|---------|---------|---------|---------|---------|---------|---------|---------|---------|---------|---------|---------|
| Q9CY73 | RM44_MOUSE  | 0.00142 | 0.00098 | 0.00191 | 0.00198 | 0.00167 | 0.00150 | 0.00113 | 0.00000 | 0.00000 | 0.00069 | 0.00000 | 0.00000 |
| Q9CYA6 | ZCHC8_MOUSE | 0.00000 | 0.00000 | 0.00000 | 0.00000 | 0.00000 | 0.00000 | 0.00000 | 0.00322 | 0.00268 | 0.00239 | 0.00448 | 0.00531 |
| Q9CYG7 | TOM34_MOUSE | 0.00000 | 0.00000 | 0.00000 | 0.00000 | 0.00000 | 0.00000 | 0.00952 | 0.00724 | 0.00793 | 0.00644 | 0.01099 | 0.01136 |
| Q9CYH2 | PXL2A_MOUSE | 0.00000 | 0.00000 | 0.00000 | 0.00000 | 0.00000 | 0.00000 | 0.01344 | 0.00912 | 0.01019 | 0.00772 | 0.00957 | 0.01182 |
| Q9CYI4 | LUC7L_MOUSE | 0.00000 | 0.00000 | 0.00000 | 0.00000 | 0.00000 | 0.00000 | 0.00000 | 0.00000 | 0.00151 | 0.00058 | 0.00000 | 0.00000 |
| Q9CYL5 | GAPR1_MOUSE | 0.00000 | 0.00000 | 0.00000 | 0.00000 | 0.00000 | 0.00000 | 0.00000 | 0.00283 | 0.00000 | 0.00383 | 0.00400 | 0.00000 |
| Q9CYN2 | SPCS2_MOUSE | 0.00000 | 0.00000 | 0.00000 | 0.00000 | 0.00000 | 0.00000 | 0.00829 | 0.01894 | 0.00586 | 0.00809 | 0.01134 | 0.00592 |
| Q9CYR0 | SSBP_MOUSE  | 0.00302 | 0.00119 | 0.00348 | 0.00338 | 0.00216 | 0.00110 | 0.00000 | 0.00468 | 0.00247 | 0.00322 | 0.00309 | 0.00232 |
| Q9CYR6 | AGM1_MOUSE  | 0.00279 | 0.00397 | 0.00212 | 0.00135 | 0.00187 | 0.00156 | 0.00133 | 0.00380 | 0.00574 | 0.00393 | 0.00203 | 0.00216 |
| Q9CYW4 | HDHD3_MOUSE | 0.00000 | 0.00000 | 0.00000 | 0.00000 | 0.00000 | 0.00000 | 0.00355 | 0.00284 | 0.00214 | 0.00154 | 0.00236 | 0.00176 |
| Q9CYZ2 | TPD54_MOUSE | 0.00179 | 0.00105 | 0.00107 | 0.00157 | 0.00263 | 0.00262 | 0.01893 | 0.01483 | 0.02842 | 0.02206 | 0.03384 | 0.02705 |
| Q9CZ04 | CSN7A_MOUSE | 0.00280 | 0.00113 | 0.00374 | 0.00236 | 0.00188 | 0.00150 | 0.00609 | 0.00642 | 0.00743 | 0.00628 | 0.00625 | 0.00664 |
| Q9CZ13 | QCR1_MOUSE  | 0.32972 | 0.32948 | 0.39775 | 0.46259 | 0.43037 | 0.51319 | 0.06995 | 0.05241 | 0.05353 | 0.05768 | 0.04993 | 0.04579 |
| Q9CZ28 | SNF8_MOUSE  | 0.00000 | 0.00000 | 0.00000 | 0.00000 | 0.00000 | 0.00000 | 0.00000 | 0.00000 | 0.00798 | 0.00502 | 0.00543 | 0.00816 |
| Q9CZ30 | OLA1_MOUSE  | 0.00668 | 0.00148 | 0.00317 | 0.00208 | 0.00491 | 0.00201 | 0.01677 | 0.01285 | 0.01589 | 0.01413 | 0.01666 | 0.01462 |
| Q9CZ42 | NNRD_MOUSE  | 0.00199 | 0.00182 | 0.00268 | 0.00144 | 0.00137 | 0.00178 | 0.02196 | 0.03062 | 0.01265 | 0.02265 | 0.02441 | 0.02331 |
| Q9CZ44 | NSF1C_MOUSE | 0.01225 | 0.00711 | 0.00603 | 0.00611 | 0.00709 | 0.00763 | 0.01788 | 0.02184 | 0.02686 | 0.02769 | 0.02596 | 0.02935 |
| Q9CZ69 | CKLF6_MOUSE | 0.00000 | 0.00000 | 0.00000 | 0.00000 | 0.00000 | 0.00000 | 0.00000 | 0.00000 | 0.00000 | 0.00000 | 0.00190 | 0.00144 |
| Q9CZB0 | C560_MOUSE  | 0.01143 | 0.00559 | 0.02786 | 0.01809 | 0.00716 | 0.00335 | 0.01699 | 0.01106 | 0.01016 | 0.01071 | 0.01144 | 0.00968 |
| Q9CZC8 | SCRN1_MOUSE | 0.00000 | 0.00000 | 0.00000 | 0.00000 | 0.00000 | 0.00000 | 0.00359 | 0.00627 | 0.01029 | 0.00802 | 0.00864 | 0.00898 |
| Q9CZD3 | GARS_MOUSE  | 0.00285 | 0.00376 | 0.00265 | 0.00170 | 0.00206 | 0.00306 | 0.00319 | 0.00650 | 0.01098 | 0.00232 | 0.01010 | 0.00866 |
| Q9CZE3 | RAB32_MOUSE | 0.00000 | 0.00000 | 0.00000 | 0.00000 | 0.00000 | 0.00000 | 0.00373 | 0.00673 | 0.00442 | 0.00616 | 0.00646 | 0.00586 |
| Q9CZH7 | MXRA7_MOUSE | 0.00000 | 0.00000 | 0.00000 | 0.00000 | 0.00000 | 0.00000 | 0.00000 | 0.01474 | 0.01543 | 0.01562 | 0.01196 | 0.00865 |
| Q9CZJ2 | HS12B_MOUSE | 0.00000 | 0.00000 | 0.00000 | 0.00000 | 0.00000 | 0.00000 | 0.01882 | 0.02289 | 0.02191 | 0.01840 | 0.02427 | 0.02378 |
| Q9CZM2 | RL15_MOUSE  | 0.00469 | 0.00806 | 0.00890 | 0.00333 | 0.00501 | 0.00435 | 0.01915 | 0.02687 | 0.01952 | 0.01793 | 0.02431 | 0.02120 |
| Q9CZN7 | GLYM_MOUSE  | 0.00851 | 0.00409 | 0.00548 | 0.00190 | 0.00486 | 0.00674 | 0.00585 | 0.00362 | 0.00414 | 0.00357 | 0.00517 | 0.00332 |
| Q9CZP5 | BCS1_MOUSE  | 0.00038 | 0.00109 | 0.00171 | 0.00075 | 0.00015 | 0.00015 | 0.00736 | 0.00113 | 0.00323 | 0.00348 | 0.00063 | 0.00358 |
| Q9CZR8 | EFTS_MOUSE  | 0.00000 | 0.00000 | 0.00000 | 0.00000 | 0.00000 | 0.00000 | 0.00000 | 0.00000 | 0.00000 | 0.00000 | 0.00000 | 0.00000 |
| Q9CZS1 | AL1B1_MOUSE | 0.00820 | 0.00904 | 0.00634 | 0.00929 | 0.01084 | 0.01217 | 0.00287 | 0.00512 | 0.00425 | 0.00665 | 0.00427 | 0.00382 |
| Q9CZU3 | MTREX_MOUSE | 0.00000 | 0.00000 | 0.00000 | 0.00000 | 0.00000 | 0.00000 | 0.00187 | 0.00313 | 0.00434 | 0.00291 | 0.00388 | 0.00546 |
| Q9CZU6 | CISY_MOUSE  | 0.31501 | 0.39078 | 0.21453 | 0.60274 | 0.23487 | 0.50947 | 0.11487 | 0.09158 | 0.06208 | 0.06926 | 0.05686 | 0.06075 |
| Q9CZW4 | ACSL3_MOUSE | 0.00000 | 0.00000 | 0.00000 | 0.00000 | 0.00000 | 0.00000 | 0.00623 | 0.00280 | 0.00660 | 0.00433 | 0.00408 | 0.00505 |
| Q9CZW5 | TOM70_MOUSE | 0.00320 | 0.00375 | 0.00424 | 0.00888 | 0.00554 | 0.00585 | 0.01031 | 0.01092 | 0.01378 | 0.01202 | 0.01448 | 0.01204 |
| Q9CZX8 | RS19_MOUSE  | 0.00000 | 0.00000 | 0.00000 | 0.00000 | 0.00000 | 0.00000 | 0.03867 | 0.05015 | 0.04069 | 0.04486 | 0.03686 | 0.05171 |





|        |             |         |         |         |         |         |         |         |         |         |         |         |         |
|--------|-------------|---------|---------|---------|---------|---------|---------|---------|---------|---------|---------|---------|---------|
| Q9D1J1 | NECP2_MOUSE | 0.00000 | 0.00000 | 0.00000 | 0.00000 | 0.00000 | 0.00000 | 0.01025 | 0.01204 | 0.01725 | 0.01351 | 0.01638 | 0.01565 |
| Q9D1J3 | SARNP_MOUSE | 0.00000 | 0.00000 | 0.00000 | 0.00000 | 0.00000 | 0.00000 | 0.01208 | 0.01703 | 0.02364 | 0.02260 | 0.02054 | 0.01629 |
| Q9D1K2 | VATF_MOUSE  | 0.00000 | 0.00000 | 0.00000 | 0.00000 | 0.00000 | 0.00000 | 0.00648 | 0.00368 | 0.00000 | 0.00243 | 0.00132 | 0.00183 |
| Q9D1L0 | CHCH2_MOUSE | 0.00808 | 0.00401 | 0.00889 | 0.00759 | 0.00552 | 0.00102 | 0.00000 | 0.00000 | 0.00108 | 0.00050 | 0.00181 | 0.00000 |
| Q9D1L9 | LTOR5_MOUSE | 0.00000 | 0.00000 | 0.00000 | 0.00000 | 0.00000 | 0.00000 | 0.00868 | 0.00851 | 0.00950 | 0.00835 | 0.01180 | 0.00760 |
| Q9D1M0 | SEC13_MOUSE | 0.00769 | 0.00536 | 0.00454 | 0.00541 | 0.00553 | 0.00456 | 0.00390 | 0.00690 | 0.01251 | 0.00953 | 0.01705 | 0.01160 |
| Q9D1N2 | HDBP1_MOUSE | 0.00000 | 0.00000 | 0.00000 | 0.00000 | 0.00000 | 0.00000 | 0.00000 | 0.00460 | 0.00244 | 0.00159 | 0.00352 | 0.00323 |
| Q9D1N9 | RM21_MOUSE  | 0.00000 | 0.00000 | 0.00000 | 0.00000 | 0.00000 | 0.00000 | 0.00000 | 0.00000 | 0.00000 | 0.00000 | 0.00000 | 0.00000 |
| Q9D1P0 | RM13_MOUSE  | 0.00000 | 0.00000 | 0.00000 | 0.00000 | 0.00000 | 0.00000 | 0.03248 | 0.00000 | 0.00000 | 0.00000 | 0.01073 | 0.00000 |
| Q9D1P4 | CHRD1_MOUSE | 0.00000 | 0.00000 | 0.00000 | 0.00000 | 0.00000 | 0.00000 | 0.00075 | 0.00214 | 0.00616 | 0.00304 | 0.00366 | 0.00204 |
| Q9D1Q6 | ERP44_MOUSE | 0.00526 | 0.00200 | 0.00324 | 0.00357 | 0.00336 | 0.00417 | 0.00667 | 0.01561 | 0.01316 | 0.01271 | 0.00731 | 0.00992 |
| Q9D1R9 | RL34_MOUSE  | 0.00000 | 0.00000 | 0.00000 | 0.00000 | 0.00000 | 0.00000 | 0.00000 | 0.00574 | 0.00597 | 0.00520 | 0.00400 | 0.00248 |
| Q9D1X0 | NOL3_MOUSE  | 0.01432 | 0.01331 | 0.01975 | 0.01880 | 0.01681 | 0.01803 | 0.03331 | 0.00744 | 0.03101 | 0.02012 | 0.02421 | 0.02382 |
| Q9D281 | NXP20_MOUSE | 0.00000 | 0.00000 | 0.00000 | 0.00000 | 0.00000 | 0.00000 | 0.00489 | 0.00847 | 0.01106 | 0.00474 | 0.00363 | 0.00694 |
| Q9D287 | SPF27_MOUSE | 0.00000 | 0.00000 | 0.00000 | 0.00000 | 0.00000 | 0.00000 | 0.00138 | 0.00205 | 0.00386 | 0.00325 | 0.00126 | 0.00140 |
| Q9D289 | TPC6B_MOUSE | 0.00000 | 0.00000 | 0.00000 | 0.00000 | 0.00000 | 0.00000 | 0.00034 | 0.00033 | 0.00117 | 0.00097 | 0.00101 | 0.00039 |
| Q9D2G2 | ODO2_MOUSE  | 0.00462 | 0.00590 | 0.00203 | 0.00926 | 0.00371 | 0.01658 | 0.10820 | 0.13324 | 0.09703 | 0.09966 | 0.12838 | 0.11619 |
| Q9D2N4 | DTNA_MOUSE  | 0.00530 | 0.00849 | 0.00846 | 0.00310 | 0.00394 | 0.00737 | 0.01894 | 0.00599 | 0.00768 | 0.00733 | 0.01187 | 0.01101 |
| Q9D2N9 | VP33A_MOUSE | 0.00000 | 0.00000 | 0.00000 | 0.00000 | 0.00000 | 0.00000 | 0.00699 | 0.00218 | 0.00828 | 0.00333 | 0.00953 | 0.01206 |
| Q9D2V7 | CORO7_MOUSE | 0.00000 | 0.00000 | 0.00000 | 0.00000 | 0.00000 | 0.00000 | 0.00499 | 0.00433 | 0.01377 | 0.00879 | 0.01578 | 0.01336 |
| Q9D2V8 | MFS10_MOUSE | 0.00000 | 0.00000 | 0.00000 | 0.00000 | 0.00000 | 0.00000 | 0.00304 | 0.00182 | 0.00716 | 0.00401 | 0.00273 | 0.00144 |
| Q9D358 | PPAC_MOUSE  | 0.00000 | 0.00000 | 0.00000 | 0.00000 | 0.00000 | 0.00000 | 0.01370 | 0.01122 | 0.01337 | 0.01791 | 0.01110 | 0.01332 |
| Q9D379 | HYEP_MOUSE  | 0.00000 | 0.00000 | 0.00000 | 0.00000 | 0.00000 | 0.00000 | 0.03361 | 0.03064 | 0.03554 | 0.03390 | 0.03837 | 0.03039 |
| Q9D394 | RUFY3_MOUSE | 0.00000 | 0.00000 | 0.00000 | 0.00000 | 0.00000 | 0.00000 | 0.00000 | 0.00000 | 0.00000 | 0.00000 | 0.00017 | 0.00000 |
| Q9D3D9 | ATPD_MOUSE  | 0.00000 | 0.00000 | 0.00000 | 0.00000 | 0.00000 | 0.00000 | 0.00535 | 0.02430 | 0.03453 | 0.02808 | 0.01564 | 0.01339 |
| Q9D3E6 | STAG1_MOUSE | 0.00000 | 0.00000 | 0.00000 | 0.00000 | 0.00000 | 0.00000 | 0.00000 | 0.00000 | 0.00000 | 0.00098 | 0.00105 | 0.00000 |
| Q9D3G5 | STX11_MOUSE | 0.00000 | 0.00000 | 0.00000 | 0.00000 | 0.00000 | 0.00000 | 0.00304 | 0.00735 | 0.00408 | 0.00553 | 0.00143 | 0.00671 |
| Q9D404 | OXSM_MOUSE  | 0.00684 | 0.00555 | 0.00569 | 0.00553 | 0.00677 | 0.00333 | 0.00000 | 0.00218 | 0.00266 | 0.00233 | 0.00179 | 0.00143 |
| Q9D4H1 | EXOC2_MOUSE | 0.00000 | 0.00000 | 0.00000 | 0.00000 | 0.00000 | 0.00000 | 0.00566 | 0.00492 | 0.00647 | 0.00540 | 0.00778 | 0.00671 |
| Q9D517 | PLCC_MOUSE  | 0.00000 | 0.00000 | 0.00000 | 0.00000 | 0.00000 | 0.00000 | 0.00544 | 0.00344 | 0.00758 | 0.00561 | 0.00612 | 0.00491 |
| Q9D554 | SF3A3_MOUSE | 0.00000 | 0.00000 | 0.00000 | 0.00000 | 0.00000 | 0.00000 | 0.00326 | 0.01017 | 0.00945 | 0.01023 | 0.00861 | 0.01155 |
| Q9D5T0 | ATAD1_MOUSE | 0.00000 | 0.00000 | 0.00000 | 0.00000 | 0.00000 | 0.00000 | 0.00194 | 0.00274 | 0.00506 | 0.00386 | 0.00257 | 0.00367 |
| Q9D5V5 | CUL5_MOUSE  | 0.00297 | 0.00244 | 0.00406 | 0.00308 | 0.00553 | 0.00186 | 0.00278 | 0.00175 | 0.00353 | 0.00226 | 0.00426 | 0.00372 |
| Q9D5V6 | SYAP1_MOUSE | 0.00152 | 0.00087 | 0.00052 | 0.00282 | 0.00158 | 0.00081 | 0.00000 | 0.00550 | 0.00577 | 0.00535 | 0.00186 | 0.00336 |

|        |             |         |         |         |         |         |         |         |         |         |         |         |         |
|--------|-------------|---------|---------|---------|---------|---------|---------|---------|---------|---------|---------|---------|---------|
| Q9D620 | RFIP1_MOUSE | 0.00000 | 0.00000 | 0.00000 | 0.00000 | 0.00000 | 0.00000 | 0.00319 | 0.00892 | 0.00613 | 0.00876 | 0.00806 | 0.01079 |
| Q9D662 | SC23B_MOUSE | 0.00000 | 0.00000 | 0.00000 | 0.00000 | 0.00000 | 0.00000 | 0.00554 | 0.00585 | 0.00963 | 0.00609 | 0.01074 | 0.00826 |
| Q9D666 | SUN1_MOUSE  | 0.00000 | 0.00000 | 0.00000 | 0.00000 | 0.00000 | 0.00000 | 0.00599 | 0.00525 | 0.00564 | 0.00360 | 0.00634 | 0.00413 |
| Q9D687 | S6A19_MOUSE | 0.00000 | 0.00000 | 0.00000 | 0.00000 | 0.00000 | 0.00000 | 0.00000 | 0.00009 | 0.00000 | 0.00000 | 0.00000 | 0.00000 |
| Q9D6F9 | TBB4A_MOUSE | 0.00087 | 0.00055 | 0.00041 | 0.00052 | 0.00042 | 0.00065 | 0.01090 | 0.02643 | 0.02361 | 0.03441 | 0.03534 | 0.03834 |
| Q9D6J5 | NDUB8_MOUSE | 0.08547 | 0.11697 | 0.12721 | 0.16703 | 0.10620 | 0.12106 | 0.01761 | 0.00853 | 0.01349 | 0.01063 | 0.00990 | 0.00972 |
| Q9D6J6 | NDUV2_MOUSE | 0.18466 | 0.13835 | 0.16094 | 0.12669 | 0.15723 | 0.10753 | 0.00671 | 0.00174 | 0.00399 | 0.00471 | 0.00605 | 0.00522 |
| Q9D6K5 | SYJ2B_MOUSE | 0.00000 | 0.00000 | 0.00000 | 0.00000 | 0.00000 | 0.00000 | 0.00330 | 0.00452 | 0.00692 | 0.00515 | 0.00607 | 0.00552 |
| Q9D6K8 | FUND2_MOUSE | 0.00000 | 0.00000 | 0.00000 | 0.00000 | 0.00000 | 0.00000 | 0.00905 | 0.00851 | 0.00000 | 0.00000 | 0.00000 | 0.00000 |
| Q9D6P8 | CALL3_MOUSE | 0.00000 | 0.00000 | 0.00000 | 0.00000 | 0.00000 | 0.00000 | 0.00274 | 0.00000 | 0.00000 | 0.00000 | 0.00000 | 0.00000 |
| Q9D6R2 | IDH3A_MOUSE | 0.03587 | 0.02224 | 0.04943 | 0.02495 | 0.02585 | 0.01990 | 0.08213 | 0.06817 | 0.07718 | 0.07393 | 0.09673 | 0.07077 |
| Q9D6S7 | RRFM_MOUSE  | 0.00462 | 0.00386 | 0.00664 | 0.00427 | 0.00466 | 0.00611 | 0.00162 | 0.00572 | 0.00172 | 0.00311 | 0.00555 | 0.00435 |
| Q9D6U8 | F162A_MOUSE | 0.00000 | 0.00000 | 0.00000 | 0.00000 | 0.00000 | 0.00000 | 0.01767 | 0.01835 | 0.01501 | 0.01898 | 0.01254 | 0.01679 |
| Q9D6Y7 | MSRA_MOUSE  | 0.00735 | 0.00380 | 0.00522 | 0.00888 | 0.00356 | 0.00363 | 0.00756 | 0.01201 | 0.01012 | 0.00846 | 0.01264 | 0.00945 |
| Q9D6Y9 | GLGB_MOUSE  | 0.00409 | 0.00539 | 0.00735 | 0.00638 | 0.00557 | 0.00314 | 0.00365 | 0.00525 | 0.00841 | 0.00419 | 0.00504 | 0.00365 |
| Q9D6Z1 | NOP56_MOUSE | 0.00000 | 0.00000 | 0.00000 | 0.00000 | 0.00000 | 0.00000 | 0.00677 | 0.00779 | 0.00745 | 0.00699 | 0.00731 | 0.00947 |
| Q9D706 | RPAP3_MOUSE | 0.00000 | 0.00000 | 0.00000 | 0.00000 | 0.00000 | 0.00000 | 0.00000 | 0.00000 | 0.00188 | 0.00139 | 0.00000 | 0.00000 |
| Q9D708 | S10AG_MOUSE | 0.00000 | 0.00000 | 0.00000 | 0.00000 | 0.00000 | 0.00000 | 0.04170 | 0.02626 | 0.05641 | 0.07478 | 0.08365 | 0.02704 |
| Q9D711 | PIR_MOUSE   | 0.00000 | 0.00000 | 0.00000 | 0.00000 | 0.00000 | 0.00000 | 0.00000 | 0.00798 | 0.00482 | 0.00801 | 0.01070 | 0.00368 |
| Q9D7A8 | ARMC1_MOUSE | 0.00204 | 0.00315 | 0.00424 | 0.00815 | 0.00732 | 0.00670 | 0.00131 | 0.00233 | 0.00162 | 0.00220 | 0.00190 | 0.00253 |
| Q9D7B1 | DUS2L_MOUSE | 0.00000 | 0.00000 | 0.00000 | 0.00000 | 0.00000 | 0.00000 | 0.01375 | 0.00000 | 0.01328 | 0.01112 | 0.00718 | 0.00342 |
| Q9D7B6 | ACAD8_MOUSE | 0.01834 | 0.02339 | 0.01108 | 0.01539 | 0.01359 | 0.03655 | 0.00335 | 0.00500 | 0.00223 | 0.00125 | 0.00067 | 0.00146 |
| Q9D7E4 | CS025_MOUSE | 0.00000 | 0.00000 | 0.00000 | 0.00000 | 0.00000 | 0.00000 | 0.00000 | 0.00045 | 0.00153 | 0.00060 | 0.00101 | 0.00094 |
| Q9D7G0 | PRPS1_MOUSE | 0.00000 | 0.00000 | 0.00000 | 0.00000 | 0.00000 | 0.00000 | 0.00474 | 0.00403 | 0.00582 | 0.00536 | 0.00540 | 0.00412 |
| Q9D7J9 | ECHD3_MOUSE | 0.00000 | 0.00000 | 0.00000 | 0.00000 | 0.00000 | 0.00000 | 0.00127 | 0.00228 | 0.00248 | 0.00064 | 0.00000 | 0.00049 |
| Q9D7L8 | TMIG1_MOUSE | 0.00000 | 0.00000 | 0.00000 | 0.00000 | 0.00000 | 0.00000 | 0.00000 | 0.01193 | 0.00000 | 0.00000 | 0.00000 | 0.00000 |
| Q9D7M1 | GID8_MOUSE  | 0.00000 | 0.00000 | 0.00000 | 0.00000 | 0.00000 | 0.00000 | 0.00280 | 0.00288 | 0.00251 | 0.00292 | 0.00377 | 0.00227 |
| Q9D7N3 | RT09_MOUSE  | 0.00213 | 0.00104 | 0.00336 | 0.00355 | 0.00166 | 0.00175 | 0.00093 | 0.00000 | 0.00000 | 0.00000 | 0.00090 | 0.00000 |
| Q9D7N9 | APMAP_MOUSE | 0.00000 | 0.00000 | 0.00000 | 0.00000 | 0.00000 | 0.00000 | 0.01292 | 0.01916 | 0.01703 | 0.01640 | 0.01718 | 0.01606 |
| Q9D7P7 | CLIC3_MOUSE | 0.00000 | 0.00000 | 0.00000 | 0.00000 | 0.00000 | 0.00000 | 0.03476 | 0.05415 | 0.06538 | 0.04764 | 0.04707 | 0.05225 |
| Q9D7P9 | SPB12_MOUSE | 0.00000 | 0.00000 | 0.00000 | 0.00000 | 0.00000 | 0.00000 | 0.02860 | 0.00009 | 0.00000 | 0.00034 | 0.00000 | 0.00000 |
| Q9D7S9 | CHMP5_MOUSE | 0.00000 | 0.00000 | 0.00000 | 0.00000 | 0.00000 | 0.00000 | 0.00771 | 0.01154 | 0.01032 | 0.01067 | 0.01532 | 0.02194 |
| Q9D7V9 | NAAA_MOUSE  | 0.00000 | 0.00000 | 0.00000 | 0.00000 | 0.00000 | 0.00000 | 0.00000 | 0.00089 | 0.00512 | 0.00281 | 0.00154 | 0.00144 |
| Q9D7X3 | DUS3_MOUSE  | 0.01779 | 0.00853 | 0.01414 | 0.00899 | 0.01025 | 0.01033 | 0.02552 | 0.02099 | 0.02402 | 0.02419 | 0.02184 | 0.02381 |

|        |             |         |         |         |         |         |         |         |         |         |         |         |         |
|--------|-------------|---------|---------|---------|---------|---------|---------|---------|---------|---------|---------|---------|---------|
| Q9D819 | IPYR_MOUSE  | 0.01447 | 0.00926 | 0.01308 | 0.00897 | 0.01301 | 0.01682 | 0.03442 | 0.01965 | 0.02059 | 0.02212 | 0.02381 | 0.01704 |
| Q9D824 | FIP1_MOUSE  | 0.00000 | 0.00000 | 0.00000 | 0.00000 | 0.00000 | 0.00000 | 0.00138 | 0.00000 | 0.00156 | 0.00381 | 0.00171 | 0.00182 |
| Q9D826 | SOX_MOUSE   | 0.00000 | 0.00000 | 0.00000 | 0.00000 | 0.00000 | 0.00000 | 0.00007 | 0.00016 | 0.00000 | 0.00000 | 0.00005 | 0.00004 |
| Q9D832 | DNJB4_MOUSE | 0.00560 | 0.00359 | 0.00453 | 0.00246 | 0.00554 | 0.00392 | 0.01349 | 0.00842 | 0.01251 | 0.01210 | 0.01939 | 0.01309 |
| Q9D855 | QCR7_MOUSE  | 0.00000 | 0.00000 | 0.00000 | 0.00000 | 0.00000 | 0.00000 | 0.04131 | 0.02221 | 0.02629 | 0.02488 | 0.02184 | 0.01988 |
| Q9D880 | TIM50_MOUSE | 0.00958 | 0.01582 | 0.01148 | 0.00997 | 0.01462 | 0.00713 | 0.01916 | 0.00599 | 0.01081 | 0.00720 | 0.01164 | 0.00432 |
| Q9D883 | U2AF1_MOUSE | 0.00000 | 0.00000 | 0.00000 | 0.00000 | 0.00000 | 0.00000 | 0.00109 | 0.00354 | 0.00502 | 0.00514 | 0.00284 | 0.00668 |
| Q9D892 | ITPA_MOUSE  | 0.00000 | 0.00000 | 0.00000 | 0.00000 | 0.00000 | 0.00000 | 0.01714 | 0.01811 | 0.01866 | 0.01630 | 0.01777 | 0.01927 |
| Q9D898 | ARP5L_MOUSE | 0.00000 | 0.00000 | 0.00000 | 0.00000 | 0.00000 | 0.00000 | 0.00659 | 0.00418 | 0.01090 | 0.00693 | 0.01054 | 0.00718 |
| Q9D8B3 | CHM4B_MOUSE | 0.00000 | 0.00000 | 0.00000 | 0.00000 | 0.00000 | 0.00000 | 0.00000 | 0.01458 | 0.02241 | 0.01683 | 0.00588 | 0.00759 |
| Q9D8B4 | NDUAB_MOUSE | 0.00000 | 0.00000 | 0.00000 | 0.00000 | 0.00000 | 0.00000 | 0.01507 | 0.01674 | 0.01607 | 0.01332 | 0.01356 | 0.01641 |
| Q9D8E6 | RL4_MOUSE   | 0.01454 | 0.02655 | 0.00656 | 0.01439 | 0.00857 | 0.01727 | 0.04132 | 0.04008 | 0.03265 | 0.03358 | 0.03051 | 0.04286 |
| Q9D8N0 | EF1G_MOUSE  | 0.02559 | 0.01324 | 0.03096 | 0.03323 | 0.01361 | 0.02244 | 0.03413 | 0.03363 | 0.03660 | 0.03507 | 0.02971 | 0.03382 |
| Q9D8N2 | DEN10_MOUSE | 0.00000 | 0.00000 | 0.00000 | 0.00000 | 0.00000 | 0.00000 | 0.00077 | 0.00082 | 0.00050 | 0.00000 | 0.00060 | 0.00149 |
| Q9D8S3 | ARFG3_MOUSE | 0.00000 | 0.00000 | 0.00000 | 0.00000 | 0.00000 | 0.00000 | 0.00740 | 0.00765 | 0.00737 | 0.00734 | 0.00633 | 0.00961 |
| Q9D8T2 | GSDMD_MOUSE | 0.00000 | 0.00000 | 0.00000 | 0.00000 | 0.00000 | 0.00000 | 0.00000 | 0.00629 | 0.00404 | 0.00384 | 0.00227 | 0.00319 |
| Q9D8T7 | SLIRP_MOUSE | 0.00000 | 0.00000 | 0.00000 | 0.00000 | 0.00000 | 0.00000 | 0.00000 | 0.00000 | 0.00000 | 0.00000 | 0.00000 | 0.00000 |
| Q9D8U8 | SNX5_MOUSE  | 0.00000 | 0.00000 | 0.00000 | 0.00000 | 0.00000 | 0.00000 | 0.02725 | 0.02734 | 0.01028 | 0.02097 | 0.00886 | 0.02287 |
| Q9D8V0 | HM13_MOUSE  | 0.00000 | 0.00000 | 0.00000 | 0.00000 | 0.00000 | 0.00000 | 0.01252 | 0.01264 | 0.01234 | 0.01297 | 0.01262 | 0.01576 |
| Q9D8W5 | PSD12_MOUSE | 0.00493 | 0.00662 | 0.00582 | 0.00480 | 0.00639 | 0.00472 | 0.02823 | 0.03547 | 0.02300 | 0.03087 | 0.02721 | 0.02738 |
| Q9D8X1 | CUTC_MOUSE  | 0.00000 | 0.00000 | 0.00000 | 0.00000 | 0.00000 | 0.00000 | 0.00000 | 0.00000 | 0.00115 | 0.00029 | 0.00000 | 0.00000 |
| Q9D8Y0 | EFHD2_MOUSE | 0.00000 | 0.00000 | 0.00000 | 0.00000 | 0.00000 | 0.00000 | 0.00397 | 0.01472 | 0.01135 | 0.02074 | 0.01281 | 0.01154 |
| Q9D8Y7 | TP8L2_MOUSE | 0.00000 | 0.00000 | 0.00000 | 0.00000 | 0.00000 | 0.00000 | 0.00024 | 0.00000 | 0.00191 | 0.00000 | 0.00364 | 0.00060 |
| Q9D906 | ATG7_MOUSE  | 0.00000 | 0.00000 | 0.00000 | 0.00000 | 0.00000 | 0.00000 | 0.00000 | 0.00454 | 0.00586 | 0.00473 | 0.00452 | 0.00212 |
| Q9D939 | ST1C2_MOUSE | 0.00000 | 0.00000 | 0.00000 | 0.00000 | 0.00000 | 0.00000 | 0.00000 | 0.00000 | 0.00051 | 0.00015 | 0.00032 | 0.00000 |
| Q9D952 | EVPL_MOUSE  | 0.00000 | 0.00000 | 0.00000 | 0.00000 | 0.00000 | 0.00000 | 0.01290 | 0.00871 | 0.00974 | 0.01153 | 0.02260 | 0.00394 |
| Q9D958 | SPCS1_MOUSE | 0.00000 | 0.00000 | 0.00000 | 0.00000 | 0.00000 | 0.00000 | 0.00636 | 0.00483 | 0.00604 | 0.00613 | 0.00242 | 0.00560 |
| Q9D964 | GATM_MOUSE  | 0.00000 | 0.00000 | 0.00000 | 0.00000 | 0.00000 | 0.00000 | 0.00010 | 0.00010 | 0.00006 | 0.00008 | 0.00003 | 0.00008 |
| Q9D967 | MGDP1_MOUSE | 0.00744 | 0.02270 | 0.00717 | 0.00490 | 0.00596 | 0.00603 | 0.00187 | 0.00345 | 0.00504 | 0.00355 | 0.00216 | 0.00289 |
| Q9D9V3 | ECHD1_MOUSE | 0.00177 | 0.00151 | 0.00179 | 0.00323 | 0.00133 | 0.00150 | 0.01124 | 0.00117 | 0.00876 | 0.00285 | 0.00098 | 0.00328 |
| Q9DAI2 | IFT22_MOUSE | 0.00000 | 0.00000 | 0.00000 | 0.00000 | 0.00000 | 0.00000 | 0.00047 | 0.00057 | 0.00205 | 0.00127 | 0.00287 | 0.00143 |
| Q9DAK9 | PHP14_MOUSE | 0.00000 | 0.00000 | 0.00000 | 0.00000 | 0.00000 | 0.00000 | 0.00000 | 0.00786 | 0.01058 | 0.01040 | 0.00334 | 0.00405 |
| Q9DAM5 | TPC_MOUSE   | 0.00000 | 0.00000 | 0.00000 | 0.00000 | 0.00000 | 0.00000 | 0.00000 | 0.00000 | 0.00000 | 0.00000 | 0.00000 | 0.00000 |
| Q9DAR7 | DCPS_MOUSE  | 0.00000 | 0.00000 | 0.00000 | 0.00000 | 0.00000 | 0.00000 | 0.01802 | 0.01134 | 0.02313 | 0.01836 | 0.02812 | 0.02272 |

|        |             |         |         |         |         |         |         |         |         |         |         |         |         |
|--------|-------------|---------|---------|---------|---------|---------|---------|---------|---------|---------|---------|---------|---------|
| Q9DAS9 | GBG12_MOUSE | 0.00418 | 0.00201 | 0.00267 | 0.00190 | 0.00297 | 0.00415 | 0.06133 | 0.03608 | 0.03553 | 0.03776 | 0.03190 | 0.05832 |
| Q9DAT5 | MTU1_MOUSE  | 0.00000 | 0.00000 | 0.00000 | 0.00000 | 0.00000 | 0.00000 | 0.00000 | 0.00000 | 0.00000 | 0.00000 | 0.00000 | 0.00000 |
| Q9DAU1 | CNPY3_MOUSE | 0.00000 | 0.00000 | 0.00000 | 0.00000 | 0.00000 | 0.00000 | 0.00000 | 0.00266 | 0.00511 | 0.00471 | 0.00200 | 0.00170 |
| Q9DAV9 | TM38B_MOUSE | 0.00000 | 0.00000 | 0.00000 | 0.00000 | 0.00000 | 0.00000 | 0.00435 | 0.00491 | 0.00081 | 0.00160 | 0.00000 | 0.00000 |
| Q9DAW9 | CNN3_MOUSE  | 0.00000 | 0.00000 | 0.00000 | 0.00000 | 0.00000 | 0.00000 | 0.02090 | 0.04061 | 0.02590 | 0.01885 | 0.03049 | 0.03207 |
| Q9DB05 | SNAА_MOUSE  | 0.00000 | 0.00000 | 0.00000 | 0.00000 | 0.00000 | 0.00000 | 0.00376 | 0.01485 | 0.01865 | 0.01380 | 0.01133 | 0.01189 |
| Q9DB15 | RM12_MOUSE  | 0.00000 | 0.00000 | 0.00000 | 0.00000 | 0.00000 | 0.00000 | 0.00000 | 0.00000 | 0.00000 | 0.00000 | 0.00000 | 0.00000 |
| Q9DB20 | ATPO_MOUSE  | 0.07947 | 0.11811 | 0.29598 | 0.19245 | 0.12623 | 0.10601 | 0.02060 | 0.02934 | 0.01749 | 0.02488 | 0.02776 | 0.03782 |
| Q9DB26 | PHYD1_MOUSE | 0.00261 | 0.00078 | 0.00271 | 0.00170 | 0.00266 | 0.00103 | 0.00000 | 0.00084 | 0.00314 | 0.00156 | 0.00191 | 0.00106 |
| Q9DB29 | IAH1_MOUSE  | 0.00360 | 0.00459 | 0.00287 | 0.00356 | 0.00314 | 0.00237 | 0.01858 | 0.01596 | 0.01150 | 0.01422 | 0.00439 | 0.01905 |
| Q9DB73 | NB5R1_MOUSE | 0.00000 | 0.00000 | 0.00000 | 0.00000 | 0.00000 | 0.00000 | 0.00000 | 0.00559 | 0.00352 | 0.00891 | 0.00329 | 0.00524 |
| Q9DB77 | QCR2_MOUSE  | 1.71037 | 1.40410 | 1.57563 | 1.23060 | 1.25827 | 1.15269 | 0.08464 | 0.06611 | 0.07770 | 0.07207 | 0.06892 | 0.06162 |
| Q9DBB8 | DHDH_MOUSE  | 0.00076 | 0.00077 | 0.00127 | 0.00044 | 0.00118 | 0.00094 | 0.00825 | 0.00798 | 0.01399 | 0.00808 | 0.00791 | 0.00969 |
| Q9DBB9 | CPN2_MOUSE  | 0.00000 | 0.00000 | 0.00000 | 0.00000 | 0.00000 | 0.00000 | 0.00511 | 0.00561 | 0.00599 | 0.00483 | 0.00477 | 0.00455 |
| Q9DBC3 | CMTR1_MOUSE | 0.00000 | 0.00000 | 0.00000 | 0.00000 | 0.00000 | 0.00000 | 0.00000 | 0.00000 | 0.00058 | 0.00024 | 0.00000 | 0.00000 |
| Q9DBC7 | KAP0_MOUSE  | 0.01776 | 0.01031 | 0.00655 | 0.01284 | 0.01174 | 0.01573 | 0.02983 | 0.03327 | 0.04432 | 0.03693 | 0.03262 | 0.03916 |
| Q9DBD0 | ICA_MOUSE   | 0.00000 | 0.00000 | 0.00000 | 0.00000 | 0.00000 | 0.00000 | 0.00445 | 0.00325 | 0.00612 | 0.00598 | 0.00864 | 0.00533 |
| Q9DBE0 | CSAD_MOUSE  | 0.00000 | 0.00000 | 0.00000 | 0.00000 | 0.00000 | 0.00000 | 0.00500 | 0.00669 | 0.00505 | 0.00329 | 0.00370 | 0.00386 |
| Q9DBE8 | ALG2_MOUSE  | 0.00000 | 0.00000 | 0.00000 | 0.00000 | 0.00000 | 0.00000 | 0.00437 | 0.00747 | 0.00627 | 0.00443 | 0.00663 | 0.00819 |
| Q9DBF1 | AL7A1_MOUSE | 0.04411 | 0.01414 | 0.01354 | 0.01097 | 0.01153 | 0.01049 | 0.02460 | 0.02989 | 0.03267 | 0.02827 | 0.04041 | 0.02569 |
| Q9DBG3 | AP2B1_MOUSE | 0.00053 | 0.00091 | 0.00030 | 0.00041 | 0.00036 | 0.00037 | 0.02794 | 0.03629 | 0.03240 | 0.03536 | 0.02711 | 0.03832 |
| Q9DBG5 | PLIN3_MOUSE | 0.01115 | 0.00861 | 0.00736 | 0.01011 | 0.00738 | 0.01445 | 0.01332 | 0.01159 | 0.01663 | 0.01549 | 0.01845 | 0.01786 |
| Q9DBG6 | RPN2_MOUSE  | 0.00492 | 0.00573 | 0.00391 | 0.00253 | 0.00351 | 0.00448 | 0.04327 | 0.03309 | 0.04374 | 0.03329 | 0.04089 | 0.03690 |
| Q9DBG9 | TX1B3_MOUSE | 0.00000 | 0.00000 | 0.00000 | 0.00000 | 0.00000 | 0.00000 | 0.00922 | 0.00719 | 0.00403 | 0.00804 | 0.00333 | 0.01036 |
| Q9DBH5 | LMAN2_MOUSE | 0.00000 | 0.00000 | 0.00000 | 0.00000 | 0.00000 | 0.00000 | 0.01834 | 0.01453 | 0.02144 | 0.01932 | 0.02104 | 0.01487 |
| Q9DBJ1 | PGAM1_MOUSE | 0.07872 | 0.06457 | 0.07242 | 0.07011 | 0.08430 | 0.07147 | 0.05798 | 0.04684 | 0.07759 | 0.06110 | 0.07083 | 0.05601 |
| Q9DBJ3 | BI2L1_MOUSE | 0.00000 | 0.00000 | 0.00000 | 0.00000 | 0.00000 | 0.00000 | 0.01204 | 0.00463 | 0.00554 | 0.00338 | 0.00509 | 0.00410 |
| Q9DBK0 | ACO12_MOUSE | 0.00000 | 0.00000 | 0.00000 | 0.00000 | 0.00000 | 0.00000 | 0.00000 | 0.00000 | 0.00000 | 0.00000 | 0.00000 | 0.00000 |
| Q9DBL1 | ACDSB_MOUSE | 0.02015 | 0.00744 | 0.02264 | 0.01110 | 0.01619 | 0.01366 | 0.00452 | 0.01289 | 0.00984 | 0.00649 | 0.01089 | 0.01376 |
| Q9DBL7 | COASY_MOUSE | 0.00000 | 0.00000 | 0.00000 | 0.00000 | 0.00000 | 0.00000 | 0.00018 | 0.00021 | 0.00193 | 0.00000 | 0.00009 | 0.00036 |
| Q9DBL9 | ABHD5_MOUSE | 0.00000 | 0.00000 | 0.00000 | 0.00000 | 0.00000 | 0.00000 | 0.00150 | 0.00000 | 0.00160 | 0.00000 | 0.00000 | 0.00000 |
| Q9DBM2 | ECHP_MOUSE  | 0.00000 | 0.00000 | 0.00000 | 0.00000 | 0.00000 | 0.00000 | 0.00072 | 0.00064 | 0.00081 | 0.00035 | 0.00078 | 0.00068 |
| Q9DBN5 | LONP2_MOUSE | 0.00000 | 0.00000 | 0.00000 | 0.00000 | 0.00000 | 0.00000 | 0.00000 | 0.00000 | 0.00000 | 0.00000 | 0.00000 | 0.00000 |
| Q9DBP0 | NPT2B_MOUSE | 0.00000 | 0.00000 | 0.00000 | 0.00000 | 0.00000 | 0.00000 | 0.00000 | 0.00270 | 0.00729 | 0.00608 | 0.00225 | 0.00422 |



|        |             |         |         |         |         |         |         |         |         |         |         |         |         |
|--------|-------------|---------|---------|---------|---------|---------|---------|---------|---------|---------|---------|---------|---------|
| Q9DBP5 | KCY_MOUSE   | 0.00000 | 0.00000 | 0.00000 | 0.00000 | 0.00000 | 0.00000 | 0.02362 | 0.02348 | 0.02305 | 0.02339 | 0.01671 | 0.02098 |
| Q9DBR1 | XRN2_MOUSE  | 0.00000 | 0.00000 | 0.00000 | 0.00000 | 0.00000 | 0.00000 | 0.00000 | 0.00187 | 0.00309 | 0.00248 | 0.00253 | 0.00114 |
| Q9DBR3 | ARMC8_MOUSE | 0.00000 | 0.00000 | 0.00000 | 0.00000 | 0.00000 | 0.00000 | 0.00000 | 0.00098 | 0.00329 | 0.00246 | 0.00360 | 0.00299 |
| Q9DBR4 | APBB2_MOUSE | 0.00000 | 0.00000 | 0.00000 | 0.00000 | 0.00000 | 0.00000 | 0.00000 | 0.00290 | 0.00000 | 0.00000 | 0.00000 | 0.00026 |
| Q9DBR7 | MYPT1_MOUSE | 0.00219 | 0.00186 | 0.00219 | 0.00286 | 0.00235 | 0.00226 | 0.00833 | 0.01627 | 0.01653 | 0.01816 | 0.01141 | 0.01582 |
| Q9DBS1 | TMM43_MOUSE | 0.00000 | 0.00000 | 0.00000 | 0.00000 | 0.00000 | 0.00000 | 0.02087 | 0.01761 | 0.02182 | 0.01926 | 0.02015 | 0.01819 |
| Q9DBS2 | TPRGL_MOUSE | 0.00000 | 0.00000 | 0.00000 | 0.00000 | 0.00000 | 0.00000 | 0.00769 | 0.00394 | 0.00651 | 0.00930 | 0.00749 | 0.00668 |
| Q9DBS5 | KLC4_MOUSE  | 0.00000 | 0.00000 | 0.00000 | 0.00000 | 0.00000 | 0.00000 | 0.00000 | 0.00000 | 0.00574 | 0.00347 | 0.00294 | 0.00206 |
| Q9DBS9 | OSBL3_MOUSE | 0.00000 | 0.00000 | 0.00000 | 0.00000 | 0.00000 | 0.00000 | 0.00000 | 0.00210 | 0.00120 | 0.00346 | 0.00124 | 0.00135 |
| Q9DBT9 | M2GD_MOUSE  | 0.00000 | 0.00000 | 0.00000 | 0.00000 | 0.00000 | 0.00000 | 0.00009 | 0.00005 | 0.00004 | 0.00015 | 0.00005 | 0.00000 |
| Q9DBV4 | MXRA8_MOUSE | 0.00000 | 0.00000 | 0.00000 | 0.00000 | 0.00000 | 0.00000 | 0.00000 | 0.00344 | 0.00490 | 0.00370 | 0.00278 | 0.00152 |
| Q9DBX1 | RGCC_MOUSE  | 0.00000 | 0.00000 | 0.00000 | 0.00000 | 0.00000 | 0.00000 | 0.01754 | 0.01565 | 0.01735 | 0.01393 | 0.02097 | 0.02241 |
| Q9DBX3 | SUSD2_MOUSE | 0.00000 | 0.00000 | 0.00000 | 0.00000 | 0.00000 | 0.00000 | 0.00000 | 0.00012 | 0.00138 | 0.00109 | 0.00020 | 0.00031 |
| Q9DBX6 | CP2S1_MOUSE | 0.00000 | 0.00000 | 0.00000 | 0.00000 | 0.00000 | 0.00000 | 0.00986 | 0.01014 | 0.01512 | 0.01229 | 0.01000 | 0.01016 |
| Q9DBZ5 | EIF3K_MOUSE | 0.00000 | 0.00000 | 0.00000 | 0.00000 | 0.00000 | 0.00000 | 0.00906 | 0.01259 | 0.00269 | 0.00623 | 0.00876 | 0.00577 |
| Q9DC07 | LNEBL_MOUSE | 0.01694 | 0.01018 | 0.00870 | 0.00354 | 0.01234 | 0.00863 | 0.07201 | 0.08743 | 0.07392 | 0.08426 | 0.05760 | 0.10827 |
| Q9DC11 | PXDC2_MOUSE | 0.00000 | 0.00000 | 0.00000 | 0.00000 | 0.00000 | 0.00000 | 0.00745 | 0.01499 | 0.01559 | 0.01851 | 0.01687 | 0.01717 |
| Q9DC16 | ERGI1_MOUSE | 0.00000 | 0.00000 | 0.00000 | 0.00000 | 0.00000 | 0.00000 | 0.00483 | 0.00351 | 0.00416 | 0.00397 | 0.00512 | 0.00561 |
| Q9DC23 | DJC10_MOUSE | 0.00000 | 0.00000 | 0.00000 | 0.00000 | 0.00000 | 0.00000 | 0.00559 | 0.00573 | 0.00000 | 0.00000 | 0.00000 | 0.00000 |
| Q9DC50 | OCTC_MOUSE  | 0.00000 | 0.00000 | 0.00000 | 0.00000 | 0.00000 | 0.00000 | 0.00000 | 0.00013 | 0.00014 | 0.00000 | 0.00007 | 0.00014 |
| Q9DC51 | GNAI3_MOUSE | 0.00880 | 0.00646 | 0.00631 | 0.00451 | 0.00678 | 0.00330 | 0.02150 | 0.02421 | 0.01269 | 0.01908 | 0.01088 | 0.01666 |
| Q9DC61 | MPPA_MOUSE  | 0.00466 | 0.00396 | 0.00367 | 0.00397 | 0.00400 | 0.00240 | 0.00000 | 0.00000 | 0.00091 | 0.00000 | 0.00000 | 0.00000 |
| Q9DC69 | NDUA9_MOUSE | 0.28109 | 0.40636 | 0.40682 | 0.39193 | 0.49617 | 0.40665 | 0.01329 | 0.00395 | 0.01003 | 0.00723 | 0.00923 | 0.00786 |
| Q9DC70 | NDUS7_MOUSE | 0.00000 | 0.00000 | 0.00000 | 0.00000 | 0.00000 | 0.00000 | 0.01845 | 0.01644 | 0.01076 | 0.01251 | 0.00652 | 0.01169 |
| Q9DCD0 | 6PGD_MOUSE  | 0.00876 | 0.00613 | 0.00545 | 0.00543 | 0.00565 | 0.00744 | 0.10057 | 0.06347 | 0.09163 | 0.07793 | 0.10237 | 0.07197 |
| Q9DCD6 | GBRAP_MOUSE | 0.00000 | 0.00000 | 0.00000 | 0.00000 | 0.00000 | 0.00000 | 0.00000 | 0.00154 | 0.00335 | 0.00268 | 0.00132 | 0.00098 |
| Q9DCF9 | SSRG_MOUSE  | 0.00000 | 0.00000 | 0.00000 | 0.00000 | 0.00000 | 0.00000 | 0.01798 | 0.01435 | 0.01000 | 0.01403 | 0.00753 | 0.01572 |
| Q9DCG6 | PBLD1_MOUSE | 0.00000 | 0.00000 | 0.00000 | 0.00000 | 0.00000 | 0.00000 | 0.00000 | 0.00000 | 0.00000 | 0.00000 | 0.00000 | 0.00000 |
| Q9DCG9 | TR112_MOUSE | 0.00000 | 0.00000 | 0.00000 | 0.00000 | 0.00000 | 0.00000 | 0.00252 | 0.00346 | 0.00119 | 0.00363 | 0.00000 | 0.00388 |
| Q9DCH4 | EIF3F_MOUSE | 0.00000 | 0.00000 | 0.00000 | 0.00000 | 0.00000 | 0.00000 | 0.00395 | 0.00764 | 0.00755 | 0.00651 | 0.00520 | 0.00749 |
| Q9DCJ5 | NDUA8_MOUSE | 0.02606 | 0.01448 | 0.03814 | 0.03089 | 0.02544 | 0.01446 | 0.03042 | 0.01445 | 0.01155 | 0.01552 | 0.01543 | 0.01277 |
| Q9DCJ9 | NPL_MOUSE   | 0.00000 | 0.00000 | 0.00000 | 0.00000 | 0.00000 | 0.00000 | 0.00000 | 0.00124 | 0.00000 | 0.00000 | 0.00000 | 0.00000 |
| Q9DCL8 | IPP2_MOUSE  | 0.00000 | 0.00000 | 0.00000 | 0.00000 | 0.00000 | 0.00000 | 0.00626 | 0.01385 | 0.00530 | 0.00781 | 0.00634 | 0.00644 |
| Q9DCL9 | PUR6_MOUSE  | 0.02241 | 0.01773 | 0.02621 | 0.02023 | 0.02300 | 0.02596 | 0.02787 | 0.03314 | 0.01731 | 0.03317 | 0.02232 | 0.02583 |



|        |             |         |         |         |         |         |         |         |         |         |         |         |         |
|--------|-------------|---------|---------|---------|---------|---------|---------|---------|---------|---------|---------|---------|---------|
| Q9DCM0 | ETHE1_MOUSE | 0.00729 | 0.00127 | 0.00422 | 0.00373 | 0.00415 | 0.00391 | 0.00143 | 0.00385 | 0.00546 | 0.00530 | 0.00444 | 0.00387 |
| Q9DCM2 | GSTK1_MOUSE | 0.06582 | 0.06002 | 0.05946 | 0.05112 | 0.05586 | 0.04211 | 0.04328 | 0.04173 | 0.02840 | 0.03056 | 0.04673 | 0.04094 |
| Q9DCN1 | NUD12_MOUSE | 0.00000 | 0.00000 | 0.00000 | 0.00000 | 0.00000 | 0.00000 | 0.00105 | 0.00029 | 0.00172 | 0.00069 | 0.00079 | 0.00125 |
| Q9DCN2 | NB5R3_MOUSE | 0.02086 | 0.00647 | 0.01051 | 0.01348 | 0.01566 | 0.01263 | 0.14302 | 0.11733 | 0.13773 | 0.13100 | 0.13841 | 0.13185 |
| Q9DCQ2 | ASPD_MOUSE  | 0.00000 | 0.00000 | 0.00000 | 0.00000 | 0.00000 | 0.00000 | 0.00000 | 0.00000 | 0.00000 | 0.00000 | 0.00000 | 0.00000 |
| Q9DCR2 | AP3S1_MOUSE | 0.00000 | 0.00000 | 0.00000 | 0.00000 | 0.00000 | 0.00000 | 0.00000 | 0.00316 | 0.00370 | 0.00462 | 0.00317 | 0.00358 |
| Q9DCS2 | MTL26_MOUSE | 0.00000 | 0.00000 | 0.00000 | 0.00000 | 0.00000 | 0.00000 | 0.00000 | 0.00169 | 0.00648 | 0.00381 | 0.00268 | 0.00000 |
| Q9DCS3 | MECR_MOUSE  | 0.00981 | 0.00834 | 0.00716 | 0.01083 | 0.00820 | 0.00762 | 0.00133 | 0.00043 | 0.00124 | 0.00237 | 0.00133 | 0.00106 |
| Q9DCS9 | NDUBA_MOUSE | 0.15917 | 0.12687 | 0.16865 | 0.15052 | 0.20901 | 0.20978 | 0.02599 | 0.01167 | 0.01545 | 0.01779 | 0.01091 | 0.01444 |
| Q9DCT1 | AKCL2_MOUSE | 0.00247 | 0.00375 | 0.00408 | 0.00425 | 0.00219 | 0.00366 | 0.00344 | 0.00269 | 0.00102 | 0.00126 | 0.00398 | 0.00413 |
| Q9DCT2 | NDUS3_MOUSE | 0.31617 | 0.31304 | 0.39226 | 0.20760 | 0.42836 | 0.36080 | 0.02295 | 0.01559 | 0.01913 | 0.01571 | 0.01472 | 0.01629 |
| Q9DCT5 | SDF2_MOUSE  | 0.00000 | 0.00000 | 0.00000 | 0.00000 | 0.00000 | 0.00000 | 0.00000 | 0.00000 | 0.00000 | 0.00000 | 0.00000 | 0.00000 |
| Q9DCT8 | CRIP2_MOUSE | 0.04729 | 0.01988 | 0.06862 | 0.04853 | 0.04858 | 0.02672 | 0.47558 | 0.54561 | 0.38838 | 0.43883 | 0.30327 | 0.51172 |
| Q9DCU2 | PLL_P_MOUSE | 0.00000 | 0.00000 | 0.00000 | 0.00000 | 0.00000 | 0.00000 | 0.00000 | 0.00355 | 0.00338 | 0.00395 | 0.00351 | 0.00264 |
| Q9DCU6 | RM04_MOUSE  | 0.00000 | 0.00000 | 0.00000 | 0.00000 | 0.00000 | 0.00000 | 0.00000 | 0.00000 | 0.00000 | 0.00000 | 0.00000 | 0.00000 |
| Q9DCU9 | HOGA1_MOUSE | 0.00000 | 0.00000 | 0.00000 | 0.00000 | 0.00000 | 0.00000 | 0.00000 | 0.00000 | 0.00000 | 0.00000 | 0.00273 | 0.00000 |
| Q9DCV4 | RMD1_MOUSE  | 0.02391 | 0.02956 | 0.01176 | 0.01555 | 0.02112 | 0.03154 | 0.01295 | 0.00799 | 0.00856 | 0.01001 | 0.01016 | 0.01025 |
| Q9DCW4 | ETFB_MOUSE  | 0.52728 | 0.85506 | 0.77440 | 0.88818 | 0.73537 | 0.72821 | 0.04638 | 0.04461 | 0.03046 | 0.03730 | 0.03276 | 0.03400 |
| Q9DCX2 | ATP5H_MOUSE | 0.74174 | 0.34923 | 0.71042 | 0.50435 | 0.55281 | 0.37263 | 0.02653 | 0.03560 | 0.04350 | 0.04113 | 0.03370 | 0.03852 |
| Q9DCX8 | IYD1_MOUSE  | 0.00000 | 0.00000 | 0.00000 | 0.00000 | 0.00000 | 0.00000 | 0.00000 | 0.00000 | 0.00000 | 0.00000 | 0.00000 | 0.00000 |
| Q9DCY0 | KEG1_MOUSE  | 0.00000 | 0.00000 | 0.00000 | 0.00000 | 0.00000 | 0.00000 | 0.00021 | 0.00039 | 0.00001 | 0.00028 | 0.00018 | 0.00013 |
| Q9DCZ4 | MIC26_MOUSE | 0.03129 | 0.03817 | 0.01769 | 0.03769 | 0.01753 | 0.04209 | 0.01189 | 0.01642 | 0.00577 | 0.01125 | 0.00876 | 0.01015 |
| Q9DD02 | HIKES_MOUSE | 0.00000 | 0.00000 | 0.00000 | 0.00000 | 0.00000 | 0.00000 | 0.00000 | 0.00200 | 0.00214 | 0.00190 | 0.00088 | 0.00092 |
| Q9DD06 | RARR2_MOUSE | 0.00000 | 0.00000 | 0.00000 | 0.00000 | 0.00000 | 0.00000 | 0.00082 | 0.00250 | 0.00236 | 0.00233 | 0.00369 | 0.00349 |
| Q9DD18 | DTD1_MOUSE  | 0.00000 | 0.00000 | 0.00000 | 0.00000 | 0.00000 | 0.00000 | 0.00000 | 0.00241 | 0.00420 | 0.00354 | 0.00187 | 0.00139 |
| Q9DD20 | MET7B_MOUSE | 0.00000 | 0.00000 | 0.00000 | 0.00000 | 0.00000 | 0.00000 | 0.00000 | 0.00000 | 0.00000 | 0.00000 | 0.00000 | 0.00000 |
| Q9EP69 | SAC1_MOUSE  | 0.00756 | 0.00263 | 0.00464 | 0.00641 | 0.00240 | 0.00283 | 0.01756 | 0.01286 | 0.01823 | 0.01543 | 0.01940 | 0.01597 |
| Q9EP71 | RAI14_MOUSE | 0.00000 | 0.00000 | 0.00000 | 0.00000 | 0.00000 | 0.00000 | 0.00889 | 0.00882 | 0.00887 | 0.00939 | 0.00641 | 0.00899 |
| Q9EP72 | EMC7_MOUSE  | 0.00000 | 0.00000 | 0.00000 | 0.00000 | 0.00000 | 0.00000 | 0.00000 | 0.00125 | 0.00264 | 0.00079 | 0.00116 | 0.00058 |
| Q9EP89 | LACTB_MOUSE | 0.00215 | 0.00289 | 0.00245 | 0.00274 | 0.00226 | 0.00116 | 0.00190 | 0.00267 | 0.00615 | 0.00478 | 0.00286 | 0.00032 |
| Q9EPB4 | ASC_MOUSE   | 0.00000 | 0.00000 | 0.00000 | 0.00000 | 0.00000 | 0.00000 | 0.00250 | 0.00000 | 0.00126 | 0.00106 | 0.00269 | 0.00150 |
| Q9EPB5 | SERHL_MOUSE | 0.00236 | 0.00164 | 0.00285 | 0.00336 | 0.00189 | 0.00152 | 0.00077 | 0.00049 | 0.00076 | 0.00031 | 0.00000 | 0.00026 |
| Q9EPC1 | PARVA_MOUSE | 0.00356 | 0.02483 | 0.00784 | 0.01016 | 0.00542 | 0.00899 | 0.04769 | 0.06268 | 0.05655 | 0.06249 | 0.06386 | 0.06113 |
| Q9EPJ9 | ARFG1_MOUSE | 0.00000 | 0.00000 | 0.00000 | 0.00000 | 0.00000 | 0.00000 | 0.00146 | 0.00319 | 0.00197 | 0.00423 | 0.00073 | 0.00485 |

|        |             |         |         |         |         |         |         |         |         |         |         |         |         |
|--------|-------------|---------|---------|---------|---------|---------|---------|---------|---------|---------|---------|---------|---------|
| Q9EPK2 | XRP2_MOUSE  | 0.00000 | 0.00000 | 0.00000 | 0.00000 | 0.00000 | 0.00000 | 0.00468 | 0.00565 | 0.00627 | 0.00510 | 0.00511 | 0.00639 |
| Q9EPK8 | TRPV4_MOUSE | 0.00000 | 0.00000 | 0.00000 | 0.00000 | 0.00000 | 0.00000 | 0.00000 | 0.00000 | 0.00000 | 0.00000 | 0.00000 | 0.00000 |
| Q9EPL8 | IPO7_MOUSE  | 0.00000 | 0.00000 | 0.00000 | 0.00000 | 0.00000 | 0.00000 | 0.00832 | 0.01244 | 0.00735 | 0.00891 | 0.01088 | 0.01065 |
| Q9EPL9 | ACOX3_MOUSE | 0.00000 | 0.00000 | 0.00000 | 0.00000 | 0.00000 | 0.00000 | 0.00196 | 0.00214 | 0.00647 | 0.00617 | 0.00490 | 0.00698 |
| Q9EPQ2 | RPGR1_MOUSE | 0.00000 | 0.00000 | 0.00000 | 0.00000 | 0.00000 | 0.00000 | 0.00217 | 0.02591 | 0.00305 | 0.00573 | 0.00000 | 0.00959 |
| Q9EPQ7 | STAR5_MOUSE | 0.00000 | 0.00000 | 0.00000 | 0.00000 | 0.00000 | 0.00000 | 0.00084 | 0.00051 | 0.00049 | 0.00053 | 0.00034 | 0.00038 |
| Q9EPT5 | SO2A1_MOUSE | 0.00000 | 0.00000 | 0.00000 | 0.00000 | 0.00000 | 0.00000 | 0.02187 | 0.05107 | 0.04452 | 0.03366 | 0.04690 | 0.05052 |
| Q9EPU0 | RENT1_MOUSE | 0.00310 | 0.00315 | 0.00267 | 0.00221 | 0.00252 | 0.00230 | 0.01107 | 0.00866 | 0.01050 | 0.01038 | 0.01204 | 0.01075 |
| Q9EPU4 | CPSF1_MOUSE | 0.00000 | 0.00000 | 0.00000 | 0.00000 | 0.00000 | 0.00000 | 0.00000 | 0.00000 | 0.00102 | 0.00112 | 0.00000 | 0.00104 |
| Q9EQ06 | DHB11_MOUSE | 0.00145 | 0.00161 | 0.00226 | 0.00204 | 0.00169 | 0.00084 | 0.01231 | 0.03186 | 0.01622 | 0.02234 | 0.02642 | 0.02566 |
| Q9EQ20 | MMSA_MOUSE  | 0.31744 | 0.25839 | 0.28782 | 0.22326 | 0.32025 | 0.27328 | 0.08128 | 0.08712 | 0.06810 | 0.05709 | 0.06869 | 0.07534 |
| Q9EQ32 | BCAP_MOUSE  | 0.00000 | 0.00000 | 0.00000 | 0.00000 | 0.00000 | 0.00000 | 0.00000 | 0.00000 | 0.00147 | 0.00056 | 0.00052 | 0.00096 |
| Q9EQ80 | NIF3L_MOUSE | 0.00000 | 0.00000 | 0.00000 | 0.00000 | 0.00000 | 0.00000 | 0.00245 | 0.00367 | 0.00238 | 0.00274 | 0.00424 | 0.00335 |
| Q9EQF6 | DPYL5_MOUSE | 0.00000 | 0.00000 | 0.00000 | 0.00000 | 0.00000 | 0.00000 | 0.00359 | 0.00576 | 0.00490 | 0.00491 | 0.00628 | 0.00451 |
| Q9EQG3 | SCEL_MOUSE  | 0.00000 | 0.00000 | 0.00000 | 0.00000 | 0.00000 | 0.00000 | 0.00313 | 0.00307 | 0.00514 | 0.00454 | 0.00686 | 0.00310 |
| Q9EQG7 | ENPP5_MOUSE | 0.00000 | 0.00000 | 0.00000 | 0.00000 | 0.00000 | 0.00000 | 0.00000 | 0.00000 | 0.00117 | 0.00235 | 0.00000 | 0.00000 |
| Q9EQG9 | CERT_MOUSE  | 0.00000 | 0.00000 | 0.00000 | 0.00000 | 0.00000 | 0.00000 | 0.00298 | 0.00347 | 0.00158 | 0.00359 | 0.00118 | 0.00232 |
| Q9EQH2 | ERAP1_MOUSE | 0.00000 | 0.00000 | 0.00000 | 0.00000 | 0.00000 | 0.00000 | 0.00318 | 0.00563 | 0.00915 | 0.00695 | 0.00845 | 0.00798 |
| Q9EQH3 | VPS35_MOUSE | 0.01531 | 0.02108 | 0.02805 | 0.01633 | 0.01172 | 0.02249 | 0.01915 | 0.02846 | 0.02731 | 0.02554 | 0.02914 | 0.02412 |
| Q9EQJ9 | MAGI3_MOUSE | 0.00000 | 0.00000 | 0.00000 | 0.00000 | 0.00000 | 0.00000 | 0.00169 | 0.00642 | 0.01035 | 0.00480 | 0.01183 | 0.00613 |
| Q9EQK5 | MVP_MOUSE   | 0.00868 | 0.01102 | 0.01162 | 0.00931 | 0.01145 | 0.01053 | 0.04001 | 0.03776 | 0.04655 | 0.04520 | 0.04409 | 0.04679 |
| Q9EQP2 | EHD4_MOUSE  | 0.02957 | 0.02715 | 0.02479 | 0.02437 | 0.02519 | 0.02852 | 0.21938 | 0.27428 | 0.16490 | 0.17333 | 0.14883 | 0.21817 |
| Q9EQS3 | MYCBP_MOUSE | 0.00000 | 0.00000 | 0.00000 | 0.00000 | 0.00000 | 0.00000 | 0.00672 | 0.00469 | 0.00937 | 0.00767 | 0.01056 | 0.00575 |
| Q9EQU5 | SET_MOUSE   | 0.00000 | 0.00000 | 0.00000 | 0.00000 | 0.00000 | 0.00000 | 0.06514 | 0.05640 | 0.06073 | 0.06577 | 0.04079 | 0.07581 |
| Q9EQW7 | KI13A_MOUSE | 0.00000 | 0.00000 | 0.00000 | 0.00000 | 0.00000 | 0.00000 | 0.00000 | 0.00000 | 0.00144 | 0.00052 | 0.00000 | 0.00000 |
| Q9EQX4 | AIF1L_MOUSE | 0.00000 | 0.00000 | 0.00000 | 0.00000 | 0.00000 | 0.00000 | 0.01145 | 0.00000 | 0.01193 | 0.00990 | 0.01278 | 0.00614 |
| Q9ER00 | STX12_MOUSE | 0.04428 | 0.00210 | 0.00272 | 0.00187 | 0.00227 | 0.00266 | 0.01141 | 0.00760 | 0.01480 | 0.01235 | 0.01649 | 0.01391 |
| Q9ER38 | TOR3A_MOUSE | 0.00000 | 0.00000 | 0.00000 | 0.00000 | 0.00000 | 0.00000 | 0.00333 | 0.00198 | 0.00389 | 0.00348 | 0.00547 | 0.00394 |
| Q9ER39 | TOR1A_MOUSE | 0.00000 | 0.00000 | 0.00000 | 0.00000 | 0.00000 | 0.00000 | 0.00095 | 0.00487 | 0.00282 | 0.00153 | 0.00000 | 0.00070 |
| Q9ER41 | TOR1B_MOUSE | 0.00000 | 0.00000 | 0.00000 | 0.00000 | 0.00000 | 0.00000 | 0.00000 | 0.00478 | 0.00173 | 0.00240 | 0.00096 | 0.00155 |
| Q9ER72 | SYCC_MOUSE  | 0.00000 | 0.00000 | 0.00000 | 0.00000 | 0.00000 | 0.00000 | 0.00000 | 0.00041 | 0.00000 | 0.00000 | 0.00171 | 0.00091 |
| Q9ER88 | RT29_MOUSE  | 0.00000 | 0.00000 | 0.00000 | 0.00000 | 0.00000 | 0.00000 | 0.00034 | 0.00000 | 0.00000 | 0.00030 | 0.00000 | 0.00000 |
| Q9ERB0 | SNP29_MOUSE | 0.00000 | 0.00000 | 0.00000 | 0.00000 | 0.00000 | 0.00000 | 0.00233 | 0.00188 | 0.00277 | 0.00326 | 0.00386 | 0.00157 |
| Q9ERD7 | TBB3_MOUSE  | 0.00156 | 0.00211 | 0.00554 | 0.00241 | 0.00124 | 0.00244 | 0.00000 | 0.00000 | 0.00098 | 0.00000 | 0.00000 | 0.00000 |

|        |             |         |         |         |         |         |         |         |         |         |         |         |         |
|--------|-------------|---------|---------|---------|---------|---------|---------|---------|---------|---------|---------|---------|---------|
| Q9ERE7 | MESD_MOUSE  | 0.00000 | 0.00000 | 0.00000 | 0.00000 | 0.00000 | 0.00000 | 0.00285 | 0.00354 | 0.00672 | 0.00502 | 0.00584 | 0.00482 |
| Q9ERF3 | WDR61_MOUSE | 0.00000 | 0.00000 | 0.00000 | 0.00000 | 0.00000 | 0.00000 | 0.01840 | 0.00653 | 0.02192 | 0.01003 | 0.02369 | 0.03052 |
| Q9ERG0 | LIMA1_MOUSE | 0.00000 | 0.00000 | 0.00000 | 0.00000 | 0.00000 | 0.00000 | 0.02066 | 0.03323 | 0.02428 | 0.02626 | 0.01984 | 0.02515 |
| Q9ERG2 | STRN3_MOUSE | 0.00080 | 0.00107 | 0.00128 | 0.00087 | 0.00054 | 0.00113 | 0.00403 | 0.00389 | 0.01014 | 0.00594 | 0.00885 | 0.00702 |
| Q9ERI2 | RB27A_MOUSE | 0.00000 | 0.00000 | 0.00000 | 0.00000 | 0.00000 | 0.00000 | 0.00273 | 0.00161 | 0.00437 | 0.00449 | 0.00256 | 0.00254 |
| Q9ERI6 | RDH14_MOUSE | 0.00187 | 0.00056 | 0.00135 | 0.00073 | 0.00064 | 0.00047 | 0.00086 | 0.00152 | 0.00055 | 0.00149 | 0.00073 | 0.00151 |
| Q9ERK4 | XPO2_MOUSE  | 0.00468 | 0.08522 | 0.00284 | 0.03001 | 0.00289 | 0.03557 | 0.00945 | 0.01228 | 0.01309 | 0.01428 | 0.01102 | 0.01565 |
| Q9ERL7 | GMFG_MOUSE  | 0.00000 | 0.00000 | 0.00000 | 0.00000 | 0.00000 | 0.00000 | 0.00000 | 0.00667 | 0.00165 | 0.00110 | 0.00559 | 0.00603 |
| Q9ERL9 | GCYA1_MOUSE | 0.00000 | 0.00000 | 0.00000 | 0.00000 | 0.00000 | 0.00000 | 0.00659 | 0.01195 | 0.01159 | 0.01173 | 0.01097 | 0.01586 |
| Q9ERNO | SCAM2_MOUSE | 0.00000 | 0.00000 | 0.00000 | 0.00000 | 0.00000 | 0.00000 | 0.01610 | 0.01214 | 0.01658 | 0.01635 | 0.01771 | 0.01751 |
| Q9ERR7 | SEP15_MOUSE | 0.00000 | 0.00000 | 0.00000 | 0.00000 | 0.00000 | 0.00000 | 0.01125 | 0.00597 | 0.01228 | 0.01225 | 0.01222 | 0.01269 |
| Q9ERS2 | NDUAD_MOUSE | 0.20454 | 0.17854 | 0.20547 | 0.18202 | 0.21932 | 0.21236 | 0.01162 | 0.01753 | 0.00824 | 0.01002 | 0.00433 | 0.01601 |
| Q9ERS5 | PKHA2_MOUSE | 0.00000 | 0.00000 | 0.00000 | 0.00000 | 0.00000 | 0.00000 | 0.00281 | 0.00172 | 0.00177 | 0.00122 | 0.00458 | 0.00508 |
| Q9ERT9 | PPR1A_MOUSE | 0.00000 | 0.00000 | 0.00000 | 0.00000 | 0.00000 | 0.00000 | 0.00000 | 0.00000 | 0.00000 | 0.00000 | 0.00000 | 0.00072 |
| Q9ERU3 | ZNF22_MOUSE | 0.00000 | 0.00000 | 0.00000 | 0.00000 | 0.00000 | 0.00000 | 0.00606 | 0.00224 | 0.00319 | 0.00293 | 0.00127 | 0.00303 |
| Q9ERU9 | RBP2_MOUSE  | 0.00000 | 0.00000 | 0.00000 | 0.00000 | 0.00000 | 0.00000 | 0.00656 | 0.00542 | 0.01269 | 0.00802 | 0.01032 | 0.00780 |
| Q9ES28 | ARHG7_MOUSE | 0.00000 | 0.00000 | 0.00000 | 0.00000 | 0.00000 | 0.00000 | 0.00381 | 0.00296 | 0.00765 | 0.00535 | 0.01015 | 0.00627 |
| Q9ES46 | PARVB_MOUSE | 0.01380 | 0.01902 | 0.01898 | 0.02285 | 0.01338 | 0.02598 | 0.02060 | 0.01097 | 0.01575 | 0.01349 | 0.01522 | 0.01438 |
| Q9ES52 | SHIP1_MOUSE | 0.00000 | 0.00000 | 0.00000 | 0.00000 | 0.00000 | 0.00000 | 0.00000 | 0.00029 | 0.00257 | 0.00074 | 0.00137 | 0.00378 |
| Q9ES56 | TPPC4_MOUSE | 0.00000 | 0.00000 | 0.00000 | 0.00000 | 0.00000 | 0.00000 | 0.01196 | 0.00947 | 0.00962 | 0.00999 | 0.00903 | 0.01140 |
| Q9ES64 | USH1C_MOUSE | 0.00000 | 0.00000 | 0.00000 | 0.00000 | 0.00000 | 0.00000 | 0.00000 | 0.00000 | 0.00000 | 0.00000 | 0.00000 | 0.00000 |
| Q9ES74 | NEK7_MOUSE  | 0.00000 | 0.00000 | 0.00000 | 0.00000 | 0.00000 | 0.00000 | 0.00345 | 0.00000 | 0.00283 | 0.00000 | 0.00276 | 0.00299 |
| Q9ES97 | RTN3_MOUSE  | 0.00877 | 0.01010 | 0.00056 | 0.00051 | 0.00534 | 0.00215 | 0.00984 | 0.02670 | 0.03188 | 0.02254 | 0.02017 | 0.01715 |
| Q9ESB3 | HRG_MOUSE   | 0.00000 | 0.00000 | 0.00000 | 0.00000 | 0.00000 | 0.00000 | 0.00730 | 0.00441 | 0.00731 | 0.00908 | 0.00655 | 0.01103 |
| Q9ESE1 | LRBA_MOUSE  | 0.00000 | 0.00000 | 0.00000 | 0.00000 | 0.00000 | 0.00000 | 0.02445 | 0.06807 | 0.05892 | 0.07948 | 0.02084 | 0.06820 |
| Q9ESG4 | CLTRN_MOUSE | 0.00000 | 0.00000 | 0.00000 | 0.00000 | 0.00000 | 0.00000 | 0.00000 | 0.00000 | 0.00686 | 0.00325 | 0.00311 | 0.00000 |
| Q9ESL4 | M3K20_MOUSE | 0.00357 | 0.00154 | 0.00358 | 0.00172 | 0.00248 | 0.00150 | 0.00260 | 0.00842 | 0.00665 | 0.00440 | 0.00760 | 0.00500 |
| Q9EST1 | GSDMA_MOUSE | 0.00000 | 0.00000 | 0.00000 | 0.00000 | 0.00000 | 0.00000 | 0.00000 | 0.00000 | 0.00000 | 0.00000 | 0.00000 | 0.00000 |
| Q9EST5 | AN32B_MOUSE | 0.00000 | 0.00000 | 0.00000 | 0.00000 | 0.00000 | 0.00000 | 0.02868 | 0.01736 | 0.03059 | 0.02295 | 0.03819 | 0.03191 |
| Q9ESW4 | AGK_MOUSE   | 0.01152 | 0.00789 | 0.00928 | 0.01072 | 0.00676 | 0.00732 | 0.00424 | 0.00204 | 0.00427 | 0.00156 | 0.00510 | 0.00347 |
| Q9ESW8 | PGPI_MOUSE  | 0.00000 | 0.00000 | 0.00000 | 0.00000 | 0.00000 | 0.00000 | 0.00000 | 0.00000 | 0.00000 | 0.00000 | 0.00000 | 0.00000 |
| Q9ESX5 | DKC1_MOUSE  | 0.00000 | 0.00000 | 0.00000 | 0.00000 | 0.00000 | 0.00000 | 0.00464 | 0.00192 | 0.00570 | 0.00373 | 0.00641 | 0.00582 |
| Q9ESZ8 | GTF2I_MOUSE | 0.00000 | 0.00000 | 0.00000 | 0.00000 | 0.00000 | 0.00000 | 0.00061 | 0.00455 | 0.00125 | 0.00665 | 0.00201 | 0.00301 |
| Q9ET01 | PYGL_MOUSE  | 0.00006 | 0.00018 | 0.00009 | 0.00037 | 0.00013 | 0.00008 | 0.01105 | 0.01006 | 0.01259 | 0.00617 | 0.00891 | 0.00747 |

|        |             |         |         |         |         |         |         |         |         |         |         |         |         |
|--------|-------------|---------|---------|---------|---------|---------|---------|---------|---------|---------|---------|---------|---------|
| Q9ET22 | DPP2_MOUSE  | 0.00000 | 0.00000 | 0.00000 | 0.00000 | 0.00000 | 0.00000 | 0.00592 | 0.00721 | 0.00621 | 0.00703 | 0.00364 | 0.01137 |
| Q9ET30 | TM9S3_MOUSE | 0.00000 | 0.00000 | 0.00000 | 0.00000 | 0.00000 | 0.00000 | 0.00414 | 0.00401 | 0.00918 | 0.00516 | 0.00687 | 0.00537 |
| Q9ET54 | PALLD_MOUSE | 0.00000 | 0.00000 | 0.00000 | 0.00000 | 0.00000 | 0.00000 | 0.01431 | 0.01360 | 0.01120 | 0.01230 | 0.00984 | 0.01303 |
| Q9ET78 | JPH2_MOUSE  | 0.01854 | 0.03445 | 0.01476 | 0.02673 | 0.02047 | 0.02073 | 0.00226 | 0.00111 | 0.00196 | 0.00107 | 0.00083 | 0.00087 |
| Q9JHH9 | COPZ2_MOUSE | 0.00000 | 0.00000 | 0.00000 | 0.00000 | 0.00000 | 0.00000 | 0.00408 | 0.00310 | 0.00649 | 0.00373 | 0.00715 | 0.00591 |
| Q9JHI5 | IVD_MOUSE   | 0.05062 | 0.03170 | 0.04118 | 0.02984 | 0.04705 | 0.05572 | 0.04552 | 0.13288 | 0.10229 | 0.08399 | 0.10030 | 0.07979 |
| Q9JHJ0 | TMOD3_MOUSE | 0.00000 | 0.00000 | 0.00000 | 0.00000 | 0.00000 | 0.00000 | 0.02601 | 0.03174 | 0.04183 | 0.03819 | 0.03473 | 0.04699 |
| Q9JHK5 | PLEK_MOUSE  | 0.00000 | 0.00000 | 0.00000 | 0.00000 | 0.00000 | 0.00000 | 0.00456 | 0.00398 | 0.00353 | 0.00673 | 0.00663 | 0.00419 |
| Q9JHL1 | NHRF2_MOUSE | 0.00000 | 0.00000 | 0.00000 | 0.00000 | 0.00000 | 0.00000 | 0.03357 | 0.03698 | 0.04916 | 0.04002 | 0.04499 | 0.03761 |
| Q9JHQ0 | ANXA9_MOUSE | 0.00000 | 0.00000 | 0.00000 | 0.00000 | 0.00000 | 0.00000 | 0.00765 | 0.00754 | 0.01163 | 0.00510 | 0.00838 | 0.00928 |
| Q9JHQ5 | LZTL1_MOUSE | 0.00000 | 0.00000 | 0.00000 | 0.00000 | 0.00000 | 0.00000 | 0.00036 | 0.00000 | 0.00222 | 0.00074 | 0.00241 | 0.00073 |
| Q9JHR7 | IDE_MOUSE   | 0.00210 | 0.00520 | 0.00311 | 0.00208 | 0.00247 | 0.00182 | 0.01260 | 0.00812 | 0.00734 | 0.00746 | 0.00851 | 0.01079 |
| Q9JHS4 | CLPX_MOUSE  | 0.00000 | 0.00000 | 0.00000 | 0.00000 | 0.00000 | 0.00000 | 0.00000 | 0.00000 | 0.00000 | 0.00000 | 0.00000 | 0.00000 |
| Q9JHU2 | PALMD_MOUSE | 0.00266 | 0.00145 | 0.00259 | 0.00204 | 0.00168 | 0.00212 | 0.00000 | 0.00000 | 0.00000 | 0.00000 | 0.00000 | 0.00000 |
| Q9JHU4 | DYHC1_MOUSE | 0.05583 | 0.06860 | 0.04703 | 0.05512 | 0.04812 | 0.05701 | 0.06868 | 0.06555 | 0.06518 | 0.06419 | 0.06812 | 0.06862 |
| Q9JHU9 | INO1_MOUSE  | 0.00000 | 0.00000 | 0.00000 | 0.00000 | 0.00000 | 0.00000 | 0.00374 | 0.00403 | 0.00467 | 0.00292 | 0.00426 | 0.00447 |
| Q9JHW2 | NIT2_MOUSE  | 0.02153 | 0.03445 | 0.01571 | 0.01908 | 0.01333 | 0.01752 | 0.03799 | 0.03991 | 0.03640 | 0.03405 | 0.01741 | 0.04647 |
| Q9JI10 | STK3_MOUSE  | 0.00000 | 0.00000 | 0.00000 | 0.00000 | 0.00000 | 0.00000 | 0.00668 | 0.01136 | 0.01309 | 0.00751 | 0.00699 | 0.01437 |
| Q9JI33 | NET4_MOUSE  | 0.00000 | 0.00000 | 0.00000 | 0.00000 | 0.00000 | 0.00000 | 0.00000 | 0.00163 | 0.00289 | 0.00221 | 0.00099 | 0.00109 |
| Q9JI46 | NUDT3_MOUSE | 0.00000 | 0.00000 | 0.00000 | 0.00000 | 0.00000 | 0.00000 | 0.00000 | 0.00577 | 0.00165 | 0.00192 | 0.00239 | 0.00316 |
| Q9JI48 | PLAC8_MOUSE | 0.00000 | 0.00000 | 0.00000 | 0.00000 | 0.00000 | 0.00000 | 0.01039 | 0.00896 | 0.01307 | 0.01263 | 0.00554 | 0.02352 |
| Q9JI75 | NQO2_MOUSE  | 0.01150 | 0.00724 | 0.00821 | 0.00427 | 0.00580 | 0.00720 | 0.02599 | 0.01609 | 0.01505 | 0.01587 | 0.02180 | 0.01611 |
| Q9JI91 | ACTN2_MOUSE | 2.17497 | 2.19004 | 1.63950 | 1.58789 | 2.00750 | 1.87618 | 0.11060 | 0.03776 | 0.03483 | 0.04074 | 0.03331 | 0.02498 |
| Q9JIF0 | ANM1_MOUSE  | 0.00856 | 0.00734 | 0.00478 | 0.00245 | 0.00259 | 0.00390 | 0.01272 | 0.01951 | 0.02188 | 0.01798 | 0.01609 | 0.01936 |
| Q9JIF7 | COPB_MOUSE  | 0.00524 | 0.00553 | 0.00431 | 0.00174 | 0.00448 | 0.00447 | 0.01352 | 0.01301 | 0.01814 | 0.01484 | 0.01675 | 0.01627 |
| Q9JIF9 | MYOTI_MOUSE | 0.00000 | 0.00000 | 0.00000 | 0.00000 | 0.00000 | 0.00000 | 0.00245 | 0.00099 | 0.00145 | 0.00150 | 0.00211 | 0.00148 |
| Q9JIG7 | CCD22_MOUSE | 0.00000 | 0.00000 | 0.00000 | 0.00000 | 0.00000 | 0.00000 | 0.00000 | 0.00702 | 0.00859 | 0.00707 | 0.00728 | 0.00617 |
| Q9JII5 | DAZP1_MOUSE | 0.00000 | 0.00000 | 0.00000 | 0.00000 | 0.00000 | 0.00000 | 0.01492 | 0.03102 | 0.02698 | 0.01778 | 0.02569 | 0.02670 |
| Q9JII6 | AK1A1_MOUSE | 0.00000 | 0.00000 | 0.00000 | 0.00000 | 0.00000 | 0.00000 | 0.04098 | 0.03487 | 0.06557 | 0.05221 | 0.07015 | 0.04858 |
| Q9JIK5 | DDX21_MOUSE | 0.00000 | 0.00000 | 0.00000 | 0.00000 | 0.00000 | 0.00000 | 0.00743 | 0.00638 | 0.00593 | 0.00786 | 0.00582 | 0.00735 |
| Q9JIL4 | NHRF3_MOUSE | 0.00000 | 0.00000 | 0.00000 | 0.00000 | 0.00000 | 0.00000 | 0.00015 | 0.00173 | 0.00017 | 0.00156 | 0.00086 | 0.00008 |
| Q9JIQ3 | DBLOH_MOUSE | 0.00132 | 0.00207 | 0.00179 | 0.00096 | 0.00202 | 0.00181 | 0.00098 | 0.01010 | 0.01119 | 0.00883 | 0.00943 | 0.00861 |
| Q9JIS8 | S12A4_MOUSE | 0.00000 | 0.00000 | 0.00000 | 0.00000 | 0.00000 | 0.00000 | 0.00103 | 0.00146 | 0.00450 | 0.00377 | 0.00203 | 0.00167 |
| Q9JIW9 | RALB_MOUSE  | 0.00000 | 0.00000 | 0.00000 | 0.00000 | 0.00000 | 0.00000 | 0.02761 | 0.04093 | 0.04743 | 0.04493 | 0.04777 | 0.05166 |

|        |             |         |         |         |         |         |         |         |         |         |         |         |         |
|--------|-------------|---------|---------|---------|---------|---------|---------|---------|---------|---------|---------|---------|---------|
| Q9JIX8 | ACINU_MOUSE | 0.00000 | 0.00000 | 0.00000 | 0.00000 | 0.00000 | 0.00000 | 0.00601 | 0.00974 | 0.01268 | 0.00861 | 0.01348 | 0.01275 |
| Q9JIY7 | NAT8_MOUSE  | 0.00000 | 0.00000 | 0.00000 | 0.00000 | 0.00000 | 0.00000 | 0.00000 | 0.00000 | 0.00000 | 0.00000 | 0.00000 | 0.00000 |
| Q9JIZ9 | PLS3_MOUSE  | 0.00000 | 0.00000 | 0.00000 | 0.00000 | 0.00000 | 0.00000 | 0.00000 | 0.00257 | 0.00056 | 0.00138 | 0.00109 | 0.00098 |
| Q9JJ28 | FLII_MOUSE  | 0.02111 | 0.00047 | 0.00112 | 0.02578 | 0.00183 | 0.01732 | 0.01419 | 0.01192 | 0.01820 | 0.01354 | 0.01452 | 0.01754 |
| Q9JJ59 | ABCB9_MOUSE | 0.00000 | 0.00000 | 0.00000 | 0.00000 | 0.00000 | 0.00000 | 0.02993 | 0.00000 | 0.00000 | 0.00000 | 0.00000 | 0.00000 |
| Q9JJC6 | RIPL1_MOUSE | 0.00000 | 0.00000 | 0.00000 | 0.00000 | 0.00000 | 0.00000 | 0.00372 | 0.00391 | 0.00386 | 0.00186 | 0.00358 | 0.00390 |
| Q9JJH1 | RNAS4_MOUSE | 0.00000 | 0.00000 | 0.00000 | 0.00000 | 0.00000 | 0.00000 | 0.00446 | 0.00877 | 0.00432 | 0.00484 | 0.00644 | 0.00645 |
| Q9JJI8 | RL38_MOUSE  | 0.00000 | 0.00000 | 0.00000 | 0.00000 | 0.00000 | 0.00000 | 0.01497 | 0.02283 | 0.01665 | 0.02459 | 0.02627 | 0.02376 |
| Q9JJK2 | LANC2_MOUSE | 0.00000 | 0.00000 | 0.00000 | 0.00000 | 0.00000 | 0.00000 | 0.00000 | 0.00338 | 0.00232 | 0.00652 | 0.01522 | 0.00879 |
| Q9JJR8 | TMM9B_MOUSE | 0.00000 | 0.00000 | 0.00000 | 0.00000 | 0.00000 | 0.00000 | 0.00000 | 0.00000 | 0.00000 | 0.00000 | 0.00000 | 0.00000 |
| Q9JJU8 | SH3L1_MOUSE | 0.00000 | 0.00000 | 0.00000 | 0.00000 | 0.00000 | 0.00000 | 0.01074 | 0.02021 | 0.02794 | 0.03017 | 0.03516 | 0.03309 |
| Q9JJW0 | PXMP4_MOUSE | 0.00000 | 0.00000 | 0.00000 | 0.00000 | 0.00000 | 0.00000 | 0.00000 | 0.00000 | 0.00026 | 0.00000 | 0.00000 | 0.00000 |
| Q9JJW5 | MYOZ2_MOUSE | 0.17835 | 0.19651 | 0.19560 | 0.18741 | 0.24198 | 0.23663 | 0.00471 | 0.00628 | 0.00277 | 0.00446 | 0.00606 | 0.00332 |
| Q9JJX6 | P2RX4_MOUSE | 0.00000 | 0.00000 | 0.00000 | 0.00000 | 0.00000 | 0.00000 | 0.00087 | 0.00522 | 0.00115 | 0.00273 | 0.00229 | 0.00248 |
| Q9JJZ2 | TBA8_MOUSE  | 0.02707 | 0.02476 | 0.01879 | 0.02180 | 0.02019 | 0.01929 | 0.00377 | 0.00144 | 0.00206 | 0.00195 | 0.00000 | 0.00000 |
| Q9JK37 | MYOZ1_MOUSE | 0.00000 | 0.00000 | 0.00000 | 0.00000 | 0.00000 | 0.00000 | 0.06800 | 0.00000 | 0.00008 | 0.00006 | 0.00006 | 0.00002 |
| Q9JK42 | PDK2_MOUSE  | 0.05535 | 0.06621 | 0.07562 | 0.05051 | 0.05520 | 0.05170 | 0.00846 | 0.00264 | 0.00000 | 0.00346 | 0.00000 | 0.00203 |
| Q9JK48 | SHLB1_MOUSE | 0.00112 | 0.00078 | 0.00239 | 0.00096 | 0.00152 | 0.00274 | 0.00487 | 0.00515 | 0.00480 | 0.00580 | 0.00468 | 0.00523 |
| Q9JK53 | PRELP_MOUSE | 0.00273 | 0.00438 | 0.00290 | 0.00445 | 0.00293 | 0.00448 | 0.05969 | 0.06673 | 0.07588 | 0.05432 | 0.06581 | 0.05879 |
| Q9JK81 | MYG1_MOUSE  | 0.00000 | 0.00000 | 0.00000 | 0.00000 | 0.00000 | 0.00000 | 0.00634 | 0.00521 | 0.00874 | 0.00759 | 0.00992 | 0.00921 |
| Q9JK83 | PAR6B_MOUSE | 0.00000 | 0.00000 | 0.00000 | 0.00000 | 0.00000 | 0.00000 | 0.00626 | 0.00775 | 0.00999 | 0.00783 | 0.01053 | 0.00680 |
| Q9JK91 | MLH1_MOUSE  | 0.00000 | 0.00000 | 0.00000 | 0.00000 | 0.00000 | 0.00000 | 0.12359 | 0.01039 | 0.09719 | 0.00419 | 0.11897 | 0.00000 |
| Q9JKB1 | UCHL3_MOUSE | 0.00616 | 0.01852 | 0.06602 | 0.01136 | 0.01226 | 0.02133 | 0.00779 | 0.00983 | 0.01008 | 0.01286 | 0.01055 | 0.01129 |
| Q9JKB3 | YBOX3_MOUSE | 0.00039 | 0.00072 | 0.00038 | 0.00035 | 0.00041 | 0.00023 | 0.00138 | 0.00014 | 0.00184 | 0.00000 | 0.00089 | 0.00075 |
| Q9JKC8 | AP3M1_MOUSE | 0.00000 | 0.00000 | 0.00000 | 0.00000 | 0.00000 | 0.00000 | 0.00624 | 0.00000 | 0.00000 | 0.00000 | 0.00054 | 0.00000 |
| Q9JKF1 | IQGA1_MOUSE | 0.00541 | 0.01096 | 0.00374 | 0.00491 | 0.00457 | 0.00574 | 0.12083 | 0.11794 | 0.11988 | 0.11812 | 0.12362 | 0.13110 |
| Q9JKF7 | RM39_MOUSE  | 0.00000 | 0.00000 | 0.00000 | 0.00000 | 0.00000 | 0.00000 | 0.00000 | 0.00000 | 0.00000 | 0.00000 | 0.00000 | 0.00000 |
| Q9JJK7 | TMOD2_MOUSE | 0.00000 | 0.00000 | 0.00000 | 0.00000 | 0.00000 | 0.00000 | 0.00000 | 0.00465 | 0.00209 | 0.00510 | 0.00000 | 0.00217 |
| Q9JKL4 | NDUF3_MOUSE | 0.00000 | 0.00000 | 0.00000 | 0.00000 | 0.00000 | 0.00000 | 0.00000 | 0.00000 | 0.00552 | 0.00183 | 0.00057 | 0.00000 |
| Q9JKR6 | HYOU1_MOUSE | 0.00119 | 0.00079 | 0.00144 | 0.00093 | 0.00136 | 0.00198 | 0.06045 | 0.06019 | 0.06675 | 0.05795 | 0.06740 | 0.06376 |
| Q9JKS4 | LDB3_MOUSE  | 0.27434 | 0.22493 | 0.19926 | 0.24394 | 0.28001 | 0.31224 | 0.01245 | 0.00601 | 0.00542 | 0.00625 | 0.00279 | 0.00358 |
| Q9JKS5 | HABP4_MOUSE | 0.00000 | 0.00000 | 0.00000 | 0.00000 | 0.00000 | 0.00000 | 0.00000 | 0.00000 | 0.00180 | 0.00000 | 0.00073 | 0.00057 |
| Q9JKV1 | ADRM1_MOUSE | 0.00000 | 0.00000 | 0.00000 | 0.00000 | 0.00000 | 0.00000 | 0.00273 | 0.00189 | 0.00554 | 0.00409 | 0.00219 | 0.00637 |
| Q9JKX6 | NUDT5_MOUSE | 0.00000 | 0.00000 | 0.00000 | 0.00000 | 0.00000 | 0.00000 | 0.00184 | 0.00353 | 0.01194 | 0.00533 | 0.00725 | 0.00592 |



|        |             |         |         |         |         |         |         |         |         |         |         |         |         |
|--------|-------------|---------|---------|---------|---------|---------|---------|---------|---------|---------|---------|---------|---------|
| Q9JKY5 | HIP1R_MOUSE | 0.00000 | 0.00000 | 0.00000 | 0.00000 | 0.00000 | 0.00000 | 0.00317 | 0.00382 | 0.00532 | 0.00317 | 0.00199 | 0.00443 |
| Q9JL16 | ISG20_MOUSE | 0.00000 | 0.00000 | 0.00000 | 0.00000 | 0.00000 | 0.00000 | 0.00270 | 0.00105 | 0.00164 | 0.00236 | 0.00134 | 0.00205 |
| Q9JL26 | FMNL1_MOUSE | 0.00000 | 0.00000 | 0.00000 | 0.00000 | 0.00000 | 0.00000 | 0.00239 | 0.00238 | 0.00343 | 0.00340 | 0.00428 | 0.00483 |
| Q9JL35 | HMGNS_MOUSE | 0.00000 | 0.00000 | 0.00000 | 0.00000 | 0.00000 | 0.00000 | 0.00201 | 0.00869 | 0.01567 | 0.01109 | 0.01338 | 0.00964 |
| Q9JL62 | GLTP_MOUSE  | 0.00000 | 0.00000 | 0.00000 | 0.00000 | 0.00000 | 0.00000 | 0.02617 | 0.02586 | 0.04963 | 0.02549 | 0.03043 | 0.04305 |
| Q9JLB0 | MPP6_MOUSE  | 0.00000 | 0.00000 | 0.00000 | 0.00000 | 0.00000 | 0.00000 | 0.00000 | 0.00000 | 0.00065 | 0.00065 | 0.00000 | 0.00164 |
| Q9JLB2 | MPP5_MOUSE  | 0.00000 | 0.00000 | 0.00000 | 0.00000 | 0.00000 | 0.00000 | 0.00566 | 0.01079 | 0.01278 | 0.00820 | 0.01426 | 0.01117 |
| Q9JLB4 | CUBN_MOUSE  | 0.00000 | 0.00000 | 0.00000 | 0.00000 | 0.00000 | 0.00000 | 0.00874 | 0.00971 | 0.00825 | 0.01022 | 0.00691 | 0.01043 |
| Q9JLF6 | TGM1_MOUSE  | 0.00000 | 0.00000 | 0.00000 | 0.00000 | 0.00000 | 0.00000 | 0.00396 | 0.00000 | 0.00136 | 0.00000 | 0.00432 | 0.00115 |
| Q9JLI6 | SCLY_MOUSE  | 0.00000 | 0.00000 | 0.00000 | 0.00000 | 0.00000 | 0.00000 | 0.00112 | 0.00145 | 0.00000 | 0.00069 | 0.00000 | 0.00149 |
| Q9JLI8 | SART3_MOUSE | 0.00000 | 0.00000 | 0.00000 | 0.00000 | 0.00000 | 0.00000 | 0.00000 | 0.00000 | 0.00141 | 0.00618 | 0.00000 | 0.00000 |
| Q9JLJ2 | AL9A1_MOUSE | 0.00590 | 0.00648 | 0.00606 | 0.00607 | 0.00846 | 0.00679 | 0.03598 | 0.08741 | 0.04540 | 0.07386 | 0.03768 | 0.05991 |
| Q9JLJ5 | ELOV1_MOUSE | 0.00000 | 0.00000 | 0.00000 | 0.00000 | 0.00000 | 0.00000 | 0.01989 | 0.04500 | 0.01697 | 0.02934 | 0.02101 | 0.01964 |
| Q9JLN9 | MTOR_MOUSE  | 0.00000 | 0.00000 | 0.00000 | 0.00000 | 0.00000 | 0.00000 | 0.09830 | 0.04871 | 0.06829 | 0.04785 | 0.06395 | 0.06840 |
| Q9JLQ0 | CD2AP_MOUSE | 0.00000 | 0.00000 | 0.00000 | 0.00000 | 0.00000 | 0.00000 | 0.00311 | 0.00405 | 0.01499 | 0.00769 | 0.02044 | 0.01125 |
| Q9JLQ2 | GIT2_MOUSE  | 0.00000 | 0.00000 | 0.00000 | 0.00000 | 0.00000 | 0.00000 | 0.00401 | 0.00283 | 0.00692 | 0.00313 | 0.00177 | 0.00575 |
| Q9JLR9 | HIG1A_MOUSE | 0.00000 | 0.00000 | 0.00000 | 0.00000 | 0.00000 | 0.00000 | 0.00616 | 0.00857 | 0.00145 | 0.00358 | 0.00185 | 0.00172 |
| Q9JLT2 | TREA_MOUSE  | 0.00000 | 0.00000 | 0.00000 | 0.00000 | 0.00000 | 0.00000 | 0.00000 | 0.00005 | 0.00000 | 0.00000 | 0.00000 | 0.00013 |
| Q9JLT4 | TRXR2_MOUSE | 0.00794 | 0.00822 | 0.01453 | 0.00909 | 0.01339 | 0.00991 | 0.02118 | 0.03239 | 0.02375 | 0.01892 | 0.00730 | 0.00000 |
| Q9JLV1 | BAG3_MOUSE  | 0.01013 | 0.00564 | 0.00335 | 0.00795 | 0.00522 | 0.00930 | 0.01256 | 0.00979 | 0.00843 | 0.00849 | 0.00683 | 0.00990 |
| Q9JLV5 | CUL3_MOUSE  | 0.00000 | 0.00000 | 0.00000 | 0.00000 | 0.00000 | 0.00000 | 0.00132 | 0.01376 | 0.01184 | 0.00986 | 0.00654 | 0.01456 |
| Q9JLV6 | PNKP_MOUSE  | 0.00000 | 0.00000 | 0.00000 | 0.00000 | 0.00000 | 0.00000 | 0.00501 | 0.00365 | 0.00633 | 0.00491 | 0.00372 | 0.00710 |
| Q9JLZ3 | AUHM_MOUSE  | 0.00000 | 0.00000 | 0.00000 | 0.00000 | 0.00000 | 0.00000 | 0.00195 | 0.00390 | 0.00387 | 0.00266 | 0.00346 | 0.00123 |
| Q9JLZ8 | SIGIR_MOUSE | 0.00000 | 0.00000 | 0.00000 | 0.00000 | 0.00000 | 0.00000 | 0.00000 | 0.00000 | 0.00000 | 0.00000 | 0.00000 | 0.00000 |
| Q9JM13 | RABX5_MOUSE | 0.00000 | 0.00000 | 0.00000 | 0.00000 | 0.00000 | 0.00000 | 0.00167 | 0.00081 | 0.00155 | 0.00159 | 0.00085 | 0.00228 |
| Q9JM14 | NT5C_MOUSE  | 0.00000 | 0.00000 | 0.00000 | 0.00000 | 0.00000 | 0.00000 | 0.01015 | 0.01009 | 0.01118 | 0.01200 | 0.01082 | 0.01088 |
| Q9JM62 | REEP6_MOUSE | 0.00000 | 0.00000 | 0.00000 | 0.00000 | 0.00000 | 0.00000 | 0.00465 | 0.00879 | 0.00000 | 0.00000 | 0.00241 | 0.00700 |
| Q9JM63 | KCJ10_MOUSE | 0.00000 | 0.00000 | 0.00000 | 0.00000 | 0.00000 | 0.00000 | 0.00000 | 0.00013 | 0.00000 | 0.00000 | 0.00000 | 0.00000 |
| Q9JM76 | ARPC3_MOUSE | 0.00000 | 0.00000 | 0.00000 | 0.00000 | 0.00000 | 0.00000 | 0.00062 | 0.01057 | 0.01791 | 0.01397 | 0.00697 | 0.01160 |
| Q9JM83 | CALM4_MOUSE | 0.00000 | 0.00000 | 0.00000 | 0.00000 | 0.00000 | 0.00000 | 0.01157 | 0.00000 | 0.00102 | 0.00000 | 0.00000 | 0.00134 |
| Q9JM96 | BORG4_MOUSE | 0.00000 | 0.00000 | 0.00000 | 0.00000 | 0.00000 | 0.00000 | 0.00663 | 0.01064 | 0.01170 | 0.01185 | 0.01160 | 0.01124 |
| Q9JMA1 | UBP14_MOUSE | 0.00742 | 0.00650 | 0.00787 | 0.02240 | 0.00585 | 0.00801 | 0.00539 | 0.01129 | 0.01370 | 0.01102 | 0.00725 | 0.01052 |
| Q9JMA9 | S6A14_MOUSE | 0.00000 | 0.00000 | 0.00000 | 0.00000 | 0.00000 | 0.00000 | 0.00676 | 0.00846 | 0.01000 | 0.00891 | 0.00765 | 0.00921 |
| Q9JMC3 | DNJA4_MOUSE | 0.00000 | 0.00000 | 0.00000 | 0.00000 | 0.00000 | 0.00000 | 0.00468 | 0.00764 | 0.00301 | 0.00491 | 0.00809 | 0.00742 |



|        |             |         |         |         |         |         |         |         |         |         |         |         |         |
|--------|-------------|---------|---------|---------|---------|---------|---------|---------|---------|---------|---------|---------|---------|
| Q9JMD0 | ZN207_MOUSE | 0.00000 | 0.00000 | 0.00000 | 0.00000 | 0.00000 | 0.00000 | 0.00000 | 0.00000 | 0.00000 | 0.00000 | 0.00000 | 0.00000 |
| Q9JMD3 | STA10_MOUSE | 0.00000 | 0.00000 | 0.00000 | 0.00000 | 0.00000 | 0.00000 | 0.00123 | 0.00585 | 0.00529 | 0.00568 | 0.00350 | 0.00527 |
| Q9JME5 | AP3B2_MOUSE | 0.00000 | 0.00000 | 0.00000 | 0.00000 | 0.00000 | 0.00000 | 0.00000 | 0.00066 | 0.00199 | 0.00108 | 0.00212 | 0.00152 |
| Q9JME7 | TPC2L_MOUSE | 0.00000 | 0.00000 | 0.00000 | 0.00000 | 0.00000 | 0.00000 | 0.00000 | 0.00000 | 0.00000 | 0.00000 | 0.00106 | 0.00151 |
| Q9JMG1 | EDF1_MOUSE  | 0.00000 | 0.00000 | 0.00000 | 0.00000 | 0.00000 | 0.00000 | 0.00000 | 0.00915 | 0.00199 | 0.00126 | 0.00000 | 0.00000 |
| Q9JMG4 | NKAI4_MOUSE | 0.00000 | 0.00000 | 0.00000 | 0.00000 | 0.00000 | 0.00000 | 0.00000 | 0.00253 | 0.00557 | 0.00202 | 0.00262 | 0.00344 |
| Q9JMG7 | HDGR3_MOUSE | 0.00000 | 0.00000 | 0.00000 | 0.00000 | 0.00000 | 0.00000 | 0.00550 | 0.00647 | 0.01013 | 0.00688 | 0.00555 | 0.00895 |
| Q9JMH6 | TRXR1_MOUSE | 0.00166 | 0.00196 | 0.00204 | 0.00109 | 0.00292 | 0.00149 | 0.00623 | 0.00798 | 0.01335 | 0.01214 | 0.01365 | 0.00965 |
| Q9JMH9 | MY18A_MOUSE | 0.01273 | 0.01415 | 0.01091 | 0.00782 | 0.01070 | 0.00922 | 0.00742 | 0.00597 | 0.00868 | 0.00657 | 0.00876 | 0.00725 |
| Q9NYQ2 | HAOX2_MOUSE | 0.00000 | 0.00000 | 0.00000 | 0.00000 | 0.00000 | 0.00000 | 0.00165 | 0.00000 | 0.00038 | 0.00033 | 0.00000 | 0.00000 |
| Q9QUH0 | GLRX1_MOUSE | 0.00000 | 0.00000 | 0.00000 | 0.00000 | 0.00000 | 0.00000 | 0.00612 | 0.00278 | 0.00418 | 0.00276 | 0.00213 | 0.00204 |
| Q9QUI0 | RHOA_MOUSE  | 0.03241 | 0.02312 | 0.02346 | 0.01619 | 0.02144 | 0.01652 | 0.00000 | 0.02594 | 0.03039 | 0.01589 | 0.00676 | 0.00887 |
| Q9QUJ7 | ACSL4_MOUSE | 0.00000 | 0.00000 | 0.00000 | 0.00000 | 0.00000 | 0.00000 | 0.02723 | 0.02189 | 0.02869 | 0.02506 | 0.02217 | 0.02451 |
| Q9QUM0 | ITA2B_MOUSE | 0.00000 | 0.00000 | 0.00000 | 0.00000 | 0.00000 | 0.00000 | 0.00298 | 0.00000 | 0.00855 | 0.00902 | 0.00551 | 0.00274 |
| Q9QUM9 | PSA6_MOUSE  | 0.00000 | 0.00000 | 0.00000 | 0.00000 | 0.00000 | 0.00000 | 0.01514 | 0.01697 | 0.02038 | 0.01791 | 0.01733 | 0.01821 |
| Q9QUP5 | HPLN1_MOUSE | 0.00000 | 0.00000 | 0.00000 | 0.00000 | 0.00000 | 0.00000 | 0.02007 | 0.00072 | 0.00000 | 0.00030 | 0.01068 | 0.00000 |
| Q9QUR6 | PPCE_MOUSE  | 0.01929 | 0.02238 | 0.03504 | 0.02089 | 0.01915 | 0.01700 | 0.05342 | 0.06507 | 0.05095 | 0.06013 | 0.05248 | 0.06903 |
| Q9QUR7 | PIN1_MOUSE  | 0.00000 | 0.00000 | 0.00000 | 0.00000 | 0.00000 | 0.00000 | 0.00000 | 0.00519 | 0.00444 | 0.01130 | 0.00424 | 0.00104 |
| Q9QVP4 | MLRA_MOUSE  | 0.18220 | 0.10302 | 0.07211 | 0.17229 | 0.22760 | 0.13460 | 0.09115 | 0.08253 | 0.08278 | 0.12557 | 0.08526 | 0.07186 |
| Q9QVP9 | FAK2_MOUSE  | 0.00000 | 0.00000 | 0.00000 | 0.00000 | 0.00000 | 0.00000 | 0.00000 | 0.00124 | 0.00529 | 0.00495 | 0.00716 | 0.00705 |
| Q9QWR8 | NAGAB_MOUSE | 0.00000 | 0.00000 | 0.00000 | 0.00000 | 0.00000 | 0.00000 | 0.01637 | 0.01902 | 0.01743 | 0.01298 | 0.01387 | 0.01430 |
| Q9QWV4 | MLF1_MOUSE  | 0.00000 | 0.00000 | 0.00000 | 0.00000 | 0.00000 | 0.00000 | 0.00378 | 0.00524 | 0.00998 | 0.00563 | 0.00920 | 0.00766 |
| Q9QX60 | DGUOK_MOUSE | 0.00693 | 0.00365 | 0.00372 | 0.00223 | 0.00522 | 0.00387 | 0.00928 | 0.01296 | 0.01169 | 0.00944 | 0.01418 | 0.01130 |
| Q9QXA5 | LSM4_MOUSE  | 0.00000 | 0.00000 | 0.00000 | 0.00000 | 0.00000 | 0.00000 | 0.09208 | 0.02011 | 0.08340 | 0.06539 | 0.02929 | 0.08584 |
| Q9QXC1 | FETUB_MOUSE | 0.00000 | 0.00000 | 0.00000 | 0.00000 | 0.00000 | 0.00000 | 0.00000 | 0.00220 | 0.00451 | 0.00221 | 0.00092 | 0.00000 |
| Q9QXD1 | ACOX2_MOUSE | 0.00000 | 0.00000 | 0.00000 | 0.00000 | 0.00000 | 0.00000 | 0.01370 | 0.00962 | 0.01459 | 0.01145 | 0.01309 | 0.01153 |
| Q9QXD6 | F16P1_MOUSE | 0.00000 | 0.00000 | 0.00000 | 0.00000 | 0.00000 | 0.00000 | 0.00000 | 0.00000 | 0.00001 | 0.00000 | 0.00000 | 0.00002 |
| Q9QXD8 | LIMD1_MOUSE | 0.00000 | 0.00000 | 0.00000 | 0.00000 | 0.00000 | 0.00000 | 0.00218 | 0.00150 | 0.00473 | 0.00466 | 0.00394 | 0.00000 |
| Q9QXE0 | HACL1_MOUSE | 0.00000 | 0.00000 | 0.00000 | 0.00000 | 0.00000 | 0.00000 | 0.00000 | 0.00000 | 0.00000 | 0.00000 | 0.00000 | 0.00250 |
| Q9QXE7 | TBL1X_MOUSE | 0.00000 | 0.00000 | 0.00000 | 0.00000 | 0.00000 | 0.00000 | 0.00000 | 0.00209 | 0.00396 | 0.00299 | 0.00568 | 0.00179 |
| Q9QXG4 | ACSA_MOUSE  | 0.00000 | 0.00000 | 0.00000 | 0.00000 | 0.00000 | 0.00000 | 0.01255 | 0.00696 | 0.00548 | 0.00280 | 0.00294 | 0.00638 |
| Q9QXK3 | COPG2_MOUSE | 0.00000 | 0.00000 | 0.00000 | 0.00000 | 0.00000 | 0.00000 | 0.00561 | 0.01499 | 0.00989 | 0.00867 | 0.00000 | 0.01030 |
| Q9QXN0 | SHRM3_MOUSE | 0.00000 | 0.00000 | 0.00000 | 0.00000 | 0.00000 | 0.00000 | 0.00000 | 0.00000 | 0.00258 | 0.00127 | 0.00134 | 0.00000 |
| Q9QXN5 | MIOX_MOUSE  | 0.00000 | 0.00000 | 0.00000 | 0.00000 | 0.00000 | 0.00000 | 0.00000 | 0.00000 | 0.00067 | 0.00000 | 0.00000 | 0.00000 |

|        |             |         |         |         |         |         |         |         |         |         |         |         |         |
|--------|-------------|---------|---------|---------|---------|---------|---------|---------|---------|---------|---------|---------|---------|
| Q9QXS1 | PLEC_MOUSE  | 0.21986 | 0.27727 | 0.20913 | 0.22790 | 0.21017 | 0.21278 | 0.11315 | 0.10168 | 0.11346 | 0.10867 | 0.10957 | 0.11136 |
| Q9QXS6 | DREB_MOUSE  | 0.00000 | 0.00000 | 0.00000 | 0.00000 | 0.00000 | 0.00000 | 0.00000 | 0.00000 | 0.00000 | 0.00000 | 0.00000 | 0.00000 |
| Q9QXT0 | CNPY2_MOUSE | 0.00000 | 0.00000 | 0.00000 | 0.00000 | 0.00000 | 0.00000 | 0.02212 | 0.02114 | 0.02127 | 0.02704 | 0.02063 | 0.02463 |
| Q9QXX4 | CMC2_MOUSE  | 0.05194 | 0.03843 | 0.05801 | 0.04874 | 0.05523 | 0.05698 | 0.00583 | 0.00924 | 0.00992 | 0.00814 | 0.00430 | 0.01038 |
| Q9QXY6 | EHD3_MOUSE  | 0.00000 | 0.00000 | 0.00000 | 0.00000 | 0.00000 | 0.00000 | 0.00287 | 0.00736 | 0.00725 | 0.00573 | 0.00540 | 0.00734 |
| Q9QXZ0 | MACF1_MOUSE | 0.00474 | 0.00022 | 0.00315 | 0.00020 | 0.00015 | 0.00307 | 0.03314 | 0.02783 | 0.03623 | 0.03601 | 0.03872 | 0.03856 |
| Q9QXZ6 | SO1A1_MOUSE | 0.00000 | 0.00000 | 0.00000 | 0.00000 | 0.00000 | 0.00000 | 0.00000 | 0.00000 | 0.00000 | 0.00795 | 0.00367 | 0.00404 |
| Q9QY30 | ABCBB_MOUSE | 0.00000 | 0.00000 | 0.00000 | 0.00000 | 0.00000 | 0.00000 | 0.00772 | 0.00745 | 0.00864 | 0.00883 | 0.00915 | 0.01036 |
| Q9QY76 | VAPB_MOUSE  | 0.00000 | 0.00000 | 0.00000 | 0.00000 | 0.00000 | 0.00000 | 0.01477 | 0.01281 | 0.02605 | 0.02203 | 0.01718 | 0.01756 |
| Q9QYA2 | TOM40_MOUSE | 0.01690 | 0.02222 | 0.01567 | 0.01030 | 0.01371 | 0.01229 | 0.00881 | 0.00804 | 0.00504 | 0.00379 | 0.00191 | 0.00363 |
| Q9QYB1 | CLIC4_MOUSE | 0.03754 | 0.04531 | 0.02782 | 0.02875 | 0.03775 | 0.03039 | 0.11042 | 0.12757 | 0.13513 | 0.11767 | 0.12331 | 0.14686 |
| Q9QYB5 | ADDG_MOUSE  | 0.00000 | 0.00000 | 0.00000 | 0.00000 | 0.00000 | 0.00000 | 0.04221 | 0.02722 | 0.03621 | 0.03808 | 0.04415 | 0.04324 |
| Q9QYB8 | ADDB_MOUSE  | 0.00000 | 0.00000 | 0.00000 | 0.00000 | 0.00000 | 0.00000 | 0.00000 | 0.00000 | 0.00000 | 0.00000 | 0.00000 | 0.00000 |
| Q9QYC0 | ADDA_MOUSE  | 0.00732 | 0.00494 | 0.00483 | 0.00583 | 0.00461 | 0.00586 | 0.02313 | 0.02099 | 0.02325 | 0.02299 | 0.02204 | 0.02658 |
| Q9QYG0 | NDRG2_MOUSE | 0.11514 | 0.14587 | 0.18642 | 0.17759 | 0.13830 | 0.17575 | 0.03232 | 0.01120 | 0.01834 | 0.01407 | 0.01809 | 0.00980 |
| Q9QYI3 | DNJC7_MOUSE | 0.00000 | 0.00000 | 0.00000 | 0.00000 | 0.00000 | 0.00000 | 0.00604 | 0.00563 | 0.00398 | 0.00450 | 0.00441 | 0.00583 |
| Q9QYI5 | DNJB2_MOUSE | 0.00000 | 0.00000 | 0.00000 | 0.00000 | 0.00000 | 0.00000 | 0.00407 | 0.00852 | 0.00358 | 0.00754 | 0.00264 | 0.00680 |
| Q9QYJ0 | DNJA2_MOUSE | 0.01960 | 0.01793 | 0.02209 | 0.01610 | 0.02112 | 0.02309 | 0.02212 | 0.01625 | 0.01399 | 0.01835 | 0.01115 | 0.02187 |
| Q9QYJ3 | DNJB1_MOUSE | 0.00000 | 0.00000 | 0.00000 | 0.00000 | 0.00000 | 0.00000 | 0.00837 | 0.00501 | 0.00702 | 0.00581 | 0.00815 | 0.00819 |
| Q9QYR9 | ACOT2_MOUSE | 0.00000 | 0.00000 | 0.00000 | 0.00000 | 0.00000 | 0.00000 | 0.03910 | 0.04575 | 0.04993 | 0.03740 | 0.03977 | 0.04780 |
| Q9QYS9 | QKI_MOUSE   | 0.00000 | 0.00000 | 0.00000 | 0.00000 | 0.00000 | 0.00000 | 0.00577 | 0.00773 | 0.00425 | 0.00463 | 0.00246 | 0.00425 |
| Q9QYY0 | GAB1_MOUSE  | 0.00000 | 0.00000 | 0.00000 | 0.00000 | 0.00000 | 0.00000 | 0.00091 | 0.00251 | 0.00059 | 0.00000 | 0.00000 | 0.00000 |
| Q9QZ06 | TOLIP_MOUSE | 0.00302 | 0.00445 | 0.00330 | 0.00286 | 0.00284 | 0.00381 | 0.02360 | 0.02268 | 0.02380 | 0.01917 | 0.02227 | 0.02140 |
| Q9QZ08 | NAGK_MOUSE  | 0.00000 | 0.00000 | 0.00000 | 0.00000 | 0.00000 | 0.00000 | 0.00588 | 0.00559 | 0.00268 | 0.00513 | 0.00200 | 0.00606 |
| Q9QZ23 | NFU1_MOUSE  | 0.00000 | 0.00000 | 0.00000 | 0.00000 | 0.00000 | 0.00000 | 0.00707 | 0.00282 | 0.00627 | 0.00649 | 0.00670 | 0.00665 |
| Q9QZ47 | TNNT3_MOUSE | 0.00000 | 0.00000 | 0.00000 | 0.00000 | 0.00000 | 0.00000 | 0.08458 | 0.00005 | 0.00007 | 0.00012 | 0.00002 | 0.00000 |
| Q9QZ73 | DCNL1_MOUSE | 0.00114 | 0.00103 | 0.00085 | 0.00066 | 0.00122 | 0.00108 | 0.00527 | 0.00365 | 0.00518 | 0.00523 | 0.00619 | 0.00586 |
| Q9QZ85 | IIGP1_MOUSE | 0.00000 | 0.00000 | 0.00000 | 0.00000 | 0.00000 | 0.00000 | 0.00042 | 0.00084 | 0.00099 | 0.00149 | 0.00000 | 0.00000 |
| Q9QZ88 | VPS29_MOUSE | 0.00000 | 0.00000 | 0.00000 | 0.00000 | 0.00000 | 0.00000 | 0.01272 | 0.02000 | 0.01401 | 0.01989 | 0.00829 | 0.01788 |
| Q9QZB7 | ARP10_MOUSE | 0.00000 | 0.00000 | 0.00000 | 0.00000 | 0.00000 | 0.00000 | 0.01110 | 0.01280 | 0.01250 | 0.00956 | 0.01236 | 0.01384 |
| Q9QZB9 | DCTN5_MOUSE | 0.00000 | 0.00000 | 0.00000 | 0.00000 | 0.00000 | 0.00000 | 0.00336 | 0.00422 | 0.00142 | 0.00298 | 0.00236 | 0.00395 |
| Q9QZD8 | DIC_MOUSE   | 0.00000 | 0.00000 | 0.00000 | 0.00000 | 0.00000 | 0.00000 | 0.00000 | 0.00624 | 0.00670 | 0.00180 | 0.00143 | 0.00310 |
| Q9QZD9 | EIF3I_MOUSE | 0.00000 | 0.00000 | 0.00000 | 0.00000 | 0.00000 | 0.00000 | 0.02426 | 0.01315 | 0.01688 | 0.01676 | 0.01320 | 0.01415 |
| Q9QZE5 | COPG1_MOUSE | 0.00027 | 0.00000 | 0.00026 | 0.00007 | 0.00124 | 0.00127 | 0.02528 | 0.02033 | 0.03201 | 0.02813 | 0.03113 | 0.02723 |

|        |             |         |         |         |         |         |         |         |         |         |         |         |         |
|--------|-------------|---------|---------|---------|---------|---------|---------|---------|---------|---------|---------|---------|---------|
| Q9QZE7 | TSNAX_MOUSE | 0.00000 | 0.00000 | 0.00000 | 0.00000 | 0.00000 | 0.00000 | 0.00059 | 0.00871 | 0.00685 | 0.00397 | 0.00938 | 0.00610 |
| Q9QZM0 | UBQL2_MOUSE | 0.00000 | 0.00000 | 0.00000 | 0.00000 | 0.00000 | 0.00000 | 0.00076 | 0.00464 | 0.00485 | 0.00425 | 0.00374 | 0.00511 |
| Q9QZN3 | FBX8_MOUSE  | 0.00000 | 0.00000 | 0.00000 | 0.00000 | 0.00000 | 0.00000 | 0.04411 | 0.00000 | 0.04544 | 0.02471 | 0.05463 | 0.02351 |
| Q9QZN4 | FBX6_MOUSE  | 0.00000 | 0.00000 | 0.00000 | 0.00000 | 0.00000 | 0.00000 | 0.00044 | 0.00068 | 0.00533 | 0.00366 | 0.00136 | 0.00053 |
| Q9QZQ1 | AFAD_MOUSE  | 0.00000 | 0.00000 | 0.00000 | 0.00000 | 0.00000 | 0.00000 | 0.01462 | 0.02160 | 0.02445 | 0.01990 | 0.01903 | 0.02413 |
| Q9QZQ8 | H2AY_MOUSE  | 0.00049 | 0.00087 | 0.00088 | 0.00088 | 0.00651 | 0.00054 | 0.10362 | 0.09070 | 0.07093 | 0.07456 | 0.09036 | 0.09235 |
| Q9QZR9 | CO4A4_MOUSE | 0.00000 | 0.00000 | 0.00000 | 0.00000 | 0.00000 | 0.00000 | 0.18822 | 0.09571 | 0.08083 | 0.10080 | 0.15276 | 0.11025 |
| Q9QZS0 | CO4A3_MOUSE | 0.00000 | 0.00000 | 0.00000 | 0.00000 | 0.00000 | 0.00000 | 0.04776 | 0.04817 | 0.02610 | 0.01670 | 0.04205 | 0.04368 |
| Q9QZS3 | NUMB_MOUSE  | 0.00000 | 0.00000 | 0.00000 | 0.00000 | 0.00000 | 0.00000 | 0.00054 | 0.00555 | 0.00953 | 0.00696 | 0.00442 | 0.00513 |
| Q9QZW0 | AT11C_MOUSE | 0.00000 | 0.00000 | 0.00000 | 0.00000 | 0.00000 | 0.00000 | 0.00000 | 0.00000 | 0.00183 | 0.00000 | 0.00198 | 0.00158 |
| Q9R020 | ZRAB2_MOUSE | 0.00000 | 0.00000 | 0.00000 | 0.00000 | 0.00000 | 0.00000 | 0.00000 | 0.00054 | 0.00267 | 0.00106 | 0.00141 | 0.00108 |
| Q9R022 | DJC12_MOUSE | 0.00000 | 0.00000 | 0.00000 | 0.00000 | 0.00000 | 0.00000 | 0.00000 | 0.00052 | 0.00000 | 0.00000 | 0.00000 | 0.00000 |
| Q9R059 | FHL3_MOUSE  | 0.00000 | 0.00000 | 0.00000 | 0.00000 | 0.00000 | 0.00000 | 0.00016 | 0.00000 | 0.00000 | 0.00000 | 0.00000 | 0.00000 |
| Q9R062 | GLYG_MOUSE  | 0.02511 | 0.01839 | 0.03260 | 0.02070 | 0.02601 | 0.02926 | 0.05511 | 0.06493 | 0.07306 | 0.07912 | 0.06499 | 0.07774 |
| Q9R069 | BCAM_MOUSE  | 0.00616 | 0.01025 | 0.00477 | 0.00357 | 0.00737 | 0.00724 | 0.09967 | 0.14835 | 0.13523 | 0.12473 | 0.10718 | 0.12495 |
| Q9R078 | AAKB1_MOUSE | 0.00000 | 0.00000 | 0.00000 | 0.00000 | 0.00000 | 0.00000 | 0.00000 | 0.00000 | 0.00159 | 0.00025 | 0.00052 | 0.00000 |
| Q9R099 | TBL2_MOUSE  | 0.00000 | 0.00000 | 0.00000 | 0.00000 | 0.00000 | 0.00000 | 0.00000 | 0.00094 | 0.00251 | 0.00169 | 0.00102 | 0.00098 |
| Q9R0A0 | PEX14_MOUSE | 0.00000 | 0.00000 | 0.00000 | 0.00000 | 0.00000 | 0.00000 | 0.00209 | 0.00276 | 0.00371 | 0.00364 | 0.00000 | 0.00275 |
| Q9R0E2 | PLOD1_MOUSE | 0.00000 | 0.00000 | 0.00000 | 0.00000 | 0.00000 | 0.00000 | 0.00146 | 0.00277 | 0.00288 | 0.00137 | 0.00392 | 0.00170 |
| Q9R0G6 | COMP_MOUSE  | 0.00000 | 0.00000 | 0.00000 | 0.00000 | 0.00000 | 0.00000 | 0.02364 | 0.00319 | 0.00336 | 0.00400 | 0.00571 | 0.00167 |
| Q9R0H0 | ACOX1_MOUSE | 0.01556 | 0.01618 | 0.01489 | 0.01221 | 0.02744 | 0.01686 | 0.00491 | 0.00355 | 0.00525 | 0.00482 | 0.00552 | 0.00351 |
| Q9R0M4 | PODXL_MOUSE | 0.00000 | 0.00000 | 0.00000 | 0.00000 | 0.00000 | 0.00000 | 0.02887 | 0.02691 | 0.03349 | 0.02746 | 0.04214 | 0.03687 |
| Q9R0M5 | TPK1_MOUSE  | 0.00000 | 0.00000 | 0.00000 | 0.00000 | 0.00000 | 0.00000 | 0.00000 | 0.00000 | 0.00156 | 0.00015 | 0.00102 | 0.00000 |
| Q9R0M6 | RAB9A_MOUSE | 0.00000 | 0.00000 | 0.00000 | 0.00000 | 0.00000 | 0.00000 | 0.00502 | 0.00566 | 0.00860 | 0.00693 | 0.00840 | 0.00484 |
| Q9R0N0 | GALK1_MOUSE | 0.00000 | 0.00000 | 0.00000 | 0.00000 | 0.00000 | 0.00000 | 0.00644 | 0.01193 | 0.00775 | 0.00914 | 0.00494 | 0.01183 |
| Q9R0P3 | ESTD_MOUSE  | 0.02808 | 0.01744 | 0.03693 | 0.01584 | 0.02542 | 0.02723 | 0.01913 | 0.02434 | 0.02545 | 0.02396 | 0.03169 | 0.02055 |
| Q9R0P4 | SMAP_MOUSE  | 0.00000 | 0.00000 | 0.00000 | 0.00000 | 0.00000 | 0.00000 | 0.00582 | 0.00400 | 0.01468 | 0.01236 | 0.01206 | 0.01064 |
| Q9R0P5 | DEST_MOUSE  | 0.00000 | 0.00000 | 0.00000 | 0.00000 | 0.00000 | 0.00000 | 0.11442 | 0.16401 | 0.13695 | 0.13296 | 0.09222 | 0.14599 |
| Q9R0P6 | SC11A_MOUSE | 0.00000 | 0.00000 | 0.00000 | 0.00000 | 0.00000 | 0.00000 | 0.01023 | 0.00994 | 0.00910 | 0.00769 | 0.00755 | 0.00860 |
| Q9R0P9 | UCHL1_MOUSE | 0.00000 | 0.00000 | 0.00000 | 0.00000 | 0.00000 | 0.00000 | 0.00746 | 0.00134 | 0.00829 | 0.00493 | 0.00361 | 0.00314 |
| Q9R0Q3 | TMED2_MOUSE | 0.00000 | 0.00000 | 0.00000 | 0.00000 | 0.00000 | 0.00000 | 0.00000 | 0.00943 | 0.01600 | 0.00820 | 0.00371 | 0.00458 |
| Q9R0Q6 | ARC1A_MOUSE | 0.00128 | 0.00162 | 0.00487 | 0.00271 | 0.00473 | 0.00170 | 0.00532 | 0.00442 | 0.00456 | 0.00445 | 0.00656 | 0.00585 |
| Q9R0Q7 | TEBP_MOUSE  | 0.00422 | 0.00235 | 0.00465 | 0.00207 | 0.00470 | 0.00373 | 0.02412 | 0.01492 | 0.02661 | 0.02135 | 0.02798 | 0.02085 |
| Q9R0U0 | SRS10_MOUSE | 0.00000 | 0.00000 | 0.00000 | 0.00000 | 0.00000 | 0.00000 | 0.00613 | 0.00659 | 0.00789 | 0.00622 | 0.00629 | 0.00739 |

|        |             |         |         |         |         |         |         |         |         |         |         |         |         |
|--------|-------------|---------|---------|---------|---------|---------|---------|---------|---------|---------|---------|---------|---------|
| Q9R0X4 | ACOT9_MOUSE | 0.00070 | 0.00282 | 0.00458 | 0.00665 | 0.00188 | 0.00251 | 0.01452 | 0.01104 | 0.01372 | 0.01186 | 0.01405 | 0.01025 |
| Q9R0Y5 | KAD1_MOUSE  | 0.10958 | 0.12080 | 0.19925 | 0.27790 | 0.10686 | 0.22485 | 0.05328 | 0.00921 | 0.02120 | 0.01512 | 0.01875 | 0.01308 |
| Q9R111 | GUAD_MOUSE  | 0.00060 | 0.00139 | 0.00059 | 0.00357 | 0.00162 | 0.00077 | 0.01783 | 0.01644 | 0.01759 | 0.01487 | 0.01642 | 0.00989 |
| Q9R112 | SQOR_MOUSE  | 0.01124 | 0.00678 | 0.01038 | 0.00715 | 0.00871 | 0.00890 | 0.01801 | 0.02400 | 0.01605 | 0.01707 | 0.01333 | 0.01972 |
| Q9R190 | MTA2_MOUSE  | 0.00000 | 0.00000 | 0.00000 | 0.00000 | 0.00000 | 0.00000 | 0.00596 | 0.00997 | 0.00356 | 0.00629 | 0.00121 | 0.00537 |
| Q9R1C7 | PR40A_MOUSE | 0.00000 | 0.00000 | 0.00000 | 0.00000 | 0.00000 | 0.00000 | 0.02060 | 0.00811 | 0.00600 | 0.00708 | 0.00664 | 0.00772 |
| Q9R1J0 | NSDHL_MOUSE | 0.00000 | 0.00000 | 0.00000 | 0.00000 | 0.00000 | 0.00000 | 0.00090 | 0.00160 | 0.00323 | 0.00279 | 0.00348 | 0.00296 |
| Q9R1K9 | CETN2_MOUSE | 0.00000 | 0.00000 | 0.00000 | 0.00000 | 0.00000 | 0.00000 | 0.00812 | 0.00974 | 0.00578 | 0.00770 | 0.00810 | 0.00754 |
| Q9R1P0 | PSA4_MOUSE  | 0.00000 | 0.00000 | 0.00000 | 0.00000 | 0.00000 | 0.00000 | 0.06979 | 0.05781 | 0.03731 | 0.05085 | 0.04132 | 0.04931 |
| Q9R1P1 | PSB3_MOUSE  | 0.01451 | 0.00980 | 0.03093 | 0.01205 | 0.00965 | 0.00931 | 0.04354 | 0.03799 | 0.04679 | 0.04690 | 0.06543 | 0.04521 |
| Q9R1P3 | PSB2_MOUSE  | 0.00000 | 0.00000 | 0.00000 | 0.00000 | 0.00000 | 0.00000 | 0.03449 | 0.01216 | 0.01987 | 0.01449 | 0.02706 | 0.01570 |
| Q9R1P4 | PSA1_MOUSE  | 0.00704 | 0.00569 | 0.00833 | 0.00663 | 0.00506 | 0.00556 | 0.01263 | 0.01755 | 0.02116 | 0.02901 | 0.01879 | 0.02400 |
| Q9R1Q7 | PLP2_MOUSE  | 0.00000 | 0.00000 | 0.00000 | 0.00000 | 0.00000 | 0.00000 | 0.02455 | 0.03429 | 0.02565 | 0.02943 | 0.00812 | 0.06533 |
| Q9R1Q8 | TAGL3_MOUSE | 0.00000 | 0.00000 | 0.00000 | 0.00000 | 0.00000 | 0.00000 | 0.00093 | 0.00126 | 0.00359 | 0.00220 | 0.00157 | 0.00279 |
| Q9R1T2 | SAE1_MOUSE  | 0.00000 | 0.00000 | 0.00000 | 0.00000 | 0.00000 | 0.00000 | 0.00361 | 0.00621 | 0.01004 | 0.00702 | 0.00892 | 0.00613 |
| Q9R1T4 | SEPT6_MOUSE | 0.00000 | 0.00000 | 0.00000 | 0.00000 | 0.00000 | 0.00000 | 0.00092 | 0.00319 | 0.00786 | 0.00577 | 0.00699 | 0.00317 |
| Q9R1W5 | CALRL_MOUSE | 0.00000 | 0.00000 | 0.00000 | 0.00000 | 0.00000 | 0.00000 | 0.00551 | 0.03600 | 0.02667 | 0.02770 | 0.01357 | 0.02354 |
| Q9R1Z8 | VINEX_MOUSE | 0.00000 | 0.00000 | 0.00000 | 0.00000 | 0.00000 | 0.00000 | 0.03057 | 0.05324 | 0.06265 | 0.04134 | 0.04280 | 0.05717 |
| Q9R233 | TPSN_MOUSE  | 0.00000 | 0.00000 | 0.00000 | 0.00000 | 0.00000 | 0.00000 | 0.01166 | 0.00743 | 0.01659 | 0.01319 | 0.01092 | 0.01904 |
| Q9R257 | HEBP1_MOUSE | 0.00000 | 0.00000 | 0.00000 | 0.00000 | 0.00000 | 0.00000 | 0.00000 | 0.00000 | 0.00067 | 0.00000 | 0.00000 | 0.00000 |
| Q9R269 | PEPL_MOUSE  | 0.00000 | 0.00000 | 0.00000 | 0.00000 | 0.00000 | 0.00000 | 0.02693 | 0.02079 | 0.03069 | 0.02303 | 0.01678 | 0.01888 |
| Q9WTI7 | MYO1C_MOUSE | 0.01766 | 0.04224 | 0.01512 | 0.02093 | 0.02069 | 0.02770 | 0.10185 | 0.11847 | 0.10553 | 0.10154 | 0.10382 | 0.12687 |
| Q9WTK5 | NFKB2_MOUSE | 0.00000 | 0.00000 | 0.00000 | 0.00000 | 0.00000 | 0.00000 | 0.00000 | 0.00000 | 0.00000 | 0.00000 | 0.00000 | 0.00000 |
| Q9WTL2 | RAB25_MOUSE | 0.00000 | 0.00000 | 0.00000 | 0.00000 | 0.00000 | 0.00000 | 0.00000 | 0.00000 | 0.00112 | 0.00000 | 0.00000 | 0.00000 |
| Q9WTL7 | LYPA2_MOUSE | 0.00000 | 0.00000 | 0.00000 | 0.00000 | 0.00000 | 0.00000 | 0.00266 | 0.00322 | 0.00385 | 0.00268 | 0.00577 | 0.00320 |
| Q9WTM5 | RUVB2_MOUSE | 0.00000 | 0.00000 | 0.00000 | 0.00000 | 0.00000 | 0.00000 | 0.00723 | 0.00723 | 0.01000 | 0.01014 | 0.00827 | 0.00989 |
| Q9WTP6 | KAD2_MOUSE  | 0.01603 | 0.00900 | 0.01321 | 0.00723 | 0.01087 | 0.00869 | 0.00808 | 0.00839 | 0.00545 | 0.00650 | 0.00537 | 0.00613 |
| Q9WTP7 | KAD3_MOUSE  | 0.03911 | 0.02382 | 0.02191 | 0.02040 | 0.01727 | 0.03129 | 0.04294 | 0.03997 | 0.03360 | 0.03148 | 0.03090 | 0.03851 |
| Q9WTQ5 | AKA12_MOUSE | 0.00000 | 0.00000 | 0.00000 | 0.00000 | 0.00000 | 0.00000 | 0.04140 | 0.04643 | 0.07592 | 0.08080 | 0.08012 | 0.09017 |
| Q9WTQ8 | TIM23_MOUSE | 0.00000 | 0.00000 | 0.00000 | 0.00000 | 0.00000 | 0.00000 | 0.00856 | 0.00738 | 0.00367 | 0.00635 | 0.00515 | 0.00693 |
| Q9WTR5 | CAD13_MOUSE | 0.03225 | 0.04477 | 0.01777 | 0.02595 | 0.02821 | 0.05880 | 0.01165 | 0.01147 | 0.02608 | 0.01404 | 0.01142 | 0.01576 |
| Q9WTU6 | MK09_MOUSE  | 0.00000 | 0.00000 | 0.00000 | 0.00000 | 0.00000 | 0.00000 | 0.01193 | 0.01554 | 0.02138 | 0.01839 | 0.00496 | 0.01927 |
| Q9WTX5 | SKP1_MOUSE  | 0.00618 | 0.00653 | 0.00946 | 0.01174 | 0.00603 | 0.00727 | 0.03417 | 0.02737 | 0.02686 | 0.03267 | 0.03059 | 0.03012 |
| Q9WTX6 | CUL1_MOUSE  | 0.00000 | 0.00000 | 0.00000 | 0.00000 | 0.00000 | 0.00000 | 0.00767 | 0.00423 | 0.00437 | 0.00415 | 0.00184 | 0.00383 |

|        |             |         |         |         |         |         |         |         |         |         |         |         |         |
|--------|-------------|---------|---------|---------|---------|---------|---------|---------|---------|---------|---------|---------|---------|
| Q9WTY4 | AQP5_MOUSE  | 0.00000 | 0.00000 | 0.00000 | 0.00000 | 0.00000 | 0.00000 | 0.00877 | 0.04703 | 0.03965 | 0.05115 | 0.03010 | 0.04661 |
| Q9WU40 | MAN1_MOUSE  | 0.00000 | 0.00000 | 0.00000 | 0.00000 | 0.00000 | 0.00000 | 0.00291 | 0.00140 | 0.00456 | 0.00152 | 0.00575 | 0.00293 |
| Q9WU78 | PDC6I_MOUSE | 0.05167 | 0.05625 | 0.03923 | 0.03067 | 0.04141 | 0.01954 | 0.03749 | 0.03129 | 0.03809 | 0.03335 | 0.03209 | 0.03163 |
| Q9WU79 | PROD_MOUSE  | 0.00157 | 0.00028 | 0.00041 | 0.00010 | 0.00028 | 0.00048 | 0.00064 | 0.00011 | 0.00000 | 0.00000 | 0.00018 | 0.00010 |
| Q9WUA2 | SYFB_MOUSE  | 0.00000 | 0.00000 | 0.00000 | 0.00000 | 0.00000 | 0.00000 | 0.01103 | 0.00888 | 0.00870 | 0.00761 | 0.01008 | 0.00886 |
| Q9WUA3 | PFKAP_MOUSE | 0.00842 | 0.00818 | 0.00631 | 0.00407 | 0.00457 | 0.00845 | 0.02719 | 0.02545 | 0.03033 | 0.02761 | 0.03333 | 0.02740 |
| Q9WUB3 | PYGM_MOUSE  | 0.52417 | 0.47258 | 1.08050 | 0.73538 | 0.75926 | 0.46605 | 0.10584 | 0.01645 | 0.01939 | 0.02176 | 0.01881 | 0.01803 |
| Q9WUB7 | CLCKA_MOUSE | 0.00000 | 0.00000 | 0.00000 | 0.00000 | 0.00000 | 0.00000 | 0.00225 | 0.00531 | 0.00186 | 0.00434 | 0.00000 | 0.00421 |
| Q9WUD1 | CHIP_MOUSE  | 0.00000 | 0.00000 | 0.00000 | 0.00000 | 0.00000 | 0.00000 | 0.00000 | 0.00250 | 0.00295 | 0.00204 | 0.00095 | 0.00102 |
| Q9WUK2 | IF4H_MOUSE  | 0.00000 | 0.00000 | 0.00000 | 0.00000 | 0.00000 | 0.00000 | 0.01773 | 0.03195 | 0.01460 | 0.01432 | 0.00665 | 0.01588 |
| Q9WUL7 | ARL3_MOUSE  | 0.00000 | 0.00000 | 0.00000 | 0.00000 | 0.00000 | 0.00000 | 0.00931 | 0.01006 | 0.00622 | 0.00745 | 0.00726 | 0.00783 |
| Q9WUM3 | COR1B_MOUSE | 0.00000 | 0.00000 | 0.00000 | 0.00000 | 0.00000 | 0.00000 | 0.02065 | 0.04370 | 0.03967 | 0.03867 | 0.03492 | 0.03134 |
| Q9WUM4 | COR1C_MOUSE | 0.00091 | 0.00181 | 0.00058 | 0.00151 | 0.00142 | 0.00257 | 0.02381 | 0.02165 | 0.02460 | 0.01959 | 0.02706 | 0.02463 |
| Q9WUM5 | SUCA_MOUSE  | 0.12148 | 0.29033 | 0.21907 | 0.31285 | 0.21956 | 0.16340 | 0.01674 | 0.01790 | 0.01964 | 0.01887 | 0.02029 | 0.01802 |
| Q9WUN2 | TBK1_MOUSE  | 0.00000 | 0.00000 | 0.00000 | 0.00000 | 0.00000 | 0.00000 | 0.00280 | 0.00242 | 0.00210 | 0.00233 | 0.00136 | 0.00000 |
| Q9WUP7 | UCHL5_MOUSE | 0.00000 | 0.00000 | 0.00000 | 0.00000 | 0.00000 | 0.00000 | 0.00419 | 0.00737 | 0.00000 | 0.00377 | 0.00000 | 0.00489 |
| Q9WUQ2 | PREB_MOUSE  | 0.00000 | 0.00000 | 0.00000 | 0.00000 | 0.00000 | 0.00000 | 0.00339 | 0.00203 | 0.00654 | 0.00522 | 0.00383 | 0.00676 |
| Q9WUR2 | ECI2_MOUSE  | 0.05797 | 0.06300 | 0.04974 | 0.07936 | 0.08343 | 0.07388 | 0.01103 | 0.00760 | 0.01411 | 0.00895 | 0.01162 | 0.01137 |
| Q9WUR9 | KAD4_MOUSE  | 0.00000 | 0.00000 | 0.00000 | 0.00000 | 0.00000 | 0.00000 | 0.00000 | 0.00000 | 0.00000 | 0.00000 | 0.00000 | 0.00000 |
| Q9WUZ9 | ENTP5_MOUSE | 0.00000 | 0.00000 | 0.00000 | 0.00000 | 0.00000 | 0.00000 | 0.00000 | 0.00000 | 0.00007 | 0.00000 | 0.00007 | 0.00000 |
| Q9WV32 | ARC1B_MOUSE | 0.00000 | 0.00000 | 0.00000 | 0.00000 | 0.00000 | 0.00000 | 0.00604 | 0.01555 | 0.02197 | 0.01733 | 0.01643 | 0.00973 |
| Q9WV34 | MPP2_MOUSE  | 0.00000 | 0.00000 | 0.00000 | 0.00000 | 0.00000 | 0.00000 | 0.00036 | 0.00050 | 0.00172 | 0.00151 | 0.00192 | 0.00286 |
| Q9WV35 | ABEC2_MOUSE | 0.02642 | 0.02226 | 0.03193 | 0.01675 | 0.03200 | 0.04449 | 0.04083 | 0.00571 | 0.00385 | 0.00330 | 0.00301 | 0.00000 |
| Q9WV54 | ASAH1_MOUSE | 0.00000 | 0.00000 | 0.00000 | 0.00000 | 0.00000 | 0.00000 | 0.03721 | 0.05456 | 0.04209 | 0.03930 | 0.05004 | 0.03933 |
| Q9WV55 | VAPA_MOUSE  | 0.00341 | 0.00378 | 0.00296 | 0.00236 | 0.00273 | 0.00328 | 0.03667 | 0.03657 | 0.03553 | 0.03816 | 0.04485 | 0.04087 |
| Q9WV60 | GSK3B_MOUSE | 0.00006 | 0.00034 | 0.00011 | 0.00022 | 0.00010 | 0.00000 | 0.00609 | 0.00398 | 0.00659 | 0.00609 | 0.00666 | 0.00524 |
| Q9WV69 | DEMA_MOUSE  | 0.00000 | 0.00000 | 0.00000 | 0.00000 | 0.00000 | 0.00000 | 0.00036 | 0.00046 | 0.00047 | 0.00067 | 0.00064 | 0.00000 |
| Q9WV80 | SNX1_MOUSE  | 0.00204 | 0.06808 | 0.00227 | 0.00224 | 0.00196 | 0.00167 | 0.00972 | 0.01250 | 0.01871 | 0.01209 | 0.01315 | 0.01508 |
| Q9WV85 | NDK3_MOUSE  | 0.00000 | 0.00000 | 0.00000 | 0.00000 | 0.00000 | 0.00000 | 0.00000 | 0.00341 | 0.00373 | 0.00264 | 0.00085 | 0.00173 |
| Q9WV91 | FPRP_MOUSE  | 0.00000 | 0.00000 | 0.00000 | 0.00000 | 0.00000 | 0.00000 | 0.00673 | 0.01651 | 0.02415 | 0.01649 | 0.02769 | 0.01331 |
| Q9WV92 | E41L3_MOUSE | 0.00000 | 0.00000 | 0.00000 | 0.00000 | 0.00000 | 0.00000 | 0.00417 | 0.00509 | 0.00408 | 0.00345 | 0.00323 | 0.00351 |
| Q9WVA3 | BUB3_MOUSE  | 0.00000 | 0.00000 | 0.00000 | 0.00000 | 0.00000 | 0.00000 | 0.00206 | 0.01261 | 0.00781 | 0.00967 | 0.00646 | 0.00939 |
| Q9WVA4 | TAGL2_MOUSE | 0.01019 | 0.00491 | 0.00690 | 0.00531 | 0.00873 | 0.01058 | 0.30631 | 0.37398 | 0.33790 | 0.36066 | 0.26813 | 0.42226 |
| Q9WVB0 | RBPM5_MOUSE | 0.00093 | 0.00082 | 0.00089 | 0.00166 | 0.00062 | 0.00018 | 0.00877 | 0.00474 | 0.00858 | 0.00701 | 0.00909 | 0.00786 |



|        |             |         |         |         |         |         |         |         |         |         |         |         |         |
|--------|-------------|---------|---------|---------|---------|---------|---------|---------|---------|---------|---------|---------|---------|
| Q9WVC3 | CAV2_MOUSE  | 0.00000 | 0.00000 | 0.00000 | 0.00000 | 0.00000 | 0.00000 | 0.02637 | 0.05537 | 0.06541 | 0.05646 | 0.06219 | 0.05916 |
| Q9WVD5 | ORNT1_MOUSE | 0.00000 | 0.00000 | 0.00000 | 0.00000 | 0.00000 | 0.00000 | 0.00147 | 0.00123 | 0.00019 | 0.00020 | 0.00000 | 0.00112 |
| Q9WVE8 | PACN2_MOUSE | 0.00880 | 0.00915 | 0.00558 | 0.00581 | 0.00591 | 0.00909 | 0.02406 | 0.03392 | 0.03704 | 0.03337 | 0.03423 | 0.03075 |
| Q9WVH9 | FBLN5_MOUSE | 0.00133 | 0.00052 | 0.00075 | 0.00018 | 0.00083 | 0.00243 | 0.02319 | 0.06883 | 0.03651 | 0.02583 | 0.03986 | 0.05495 |
| Q9WVJ2 | PSD13_MOUSE | 0.01449 | 0.01693 | 0.01375 | 0.01704 | 0.01543 | 0.01489 | 0.01638 | 0.01365 | 0.02112 | 0.01815 | 0.02211 | 0.01600 |
| Q9WVJ3 | CBPQ_MOUSE  | 0.00091 | 0.00025 | 0.00051 | 0.00081 | 0.00077 | 0.00081 | 0.00321 | 0.00090 | 0.00868 | 0.00696 | 0.00729 | 0.00513 |
| Q9WVJ9 | FBLN4_MOUSE | 0.00000 | 0.00000 | 0.00000 | 0.00000 | 0.00000 | 0.00000 | 0.00000 | 0.00529 | 0.00000 | 0.00000 | 0.00000 | 0.00000 |
| Q9WVK0 | ATRAP_MOUSE | 0.00000 | 0.00000 | 0.00000 | 0.00000 | 0.00000 | 0.00000 | 0.00000 | 0.00265 | 0.00000 | 0.00151 | 0.00000 | 0.00213 |
| Q9WVK4 | EHD1_MOUSE  | 0.02717 | 0.01772 | 0.02502 | 0.01963 | 0.02976 | 0.02510 | 0.15354 | 0.13723 | 0.15537 | 0.13814 | 0.15384 | 0.15284 |
| Q9WVL0 | MAAI_MOUSE  | 0.02074 | 0.01541 | 0.01377 | 0.01000 | 0.01111 | 0.01195 | 0.01948 | 0.01408 | 0.01588 | 0.01301 | 0.01279 | 0.01028 |
| Q9WVL3 | S12A7_MOUSE | 0.01188 | 0.01175 | 0.01142 | 0.01114 | 0.00773 | 0.01273 | 0.00000 | 0.00000 | 0.00000 | 0.00000 | 0.00467 | 0.00000 |
| Q9WVM8 | AADAT_MOUSE | 0.00000 | 0.00000 | 0.00000 | 0.00000 | 0.00000 | 0.00000 | 0.00000 | 0.00000 | 0.00000 | 0.00000 | 0.00000 | 0.00000 |
| Q9WVQ5 | MTNB_MOUSE  | 0.00471 | 0.00282 | 0.00295 | 0.00372 | 0.00386 | 0.00363 | 0.00486 | 0.00976 | 0.00847 | 0.00800 | 0.00332 | 0.01115 |
| Q9WVR4 | FXR2_MOUSE  | 0.00000 | 0.00000 | 0.00000 | 0.00000 | 0.00000 | 0.00000 | 0.00000 | 0.00374 | 0.00000 | 0.00124 | 0.00000 | 0.00127 |
| Q9WVT6 | CAH14_MOUSE | 0.00000 | 0.00000 | 0.00000 | 0.00000 | 0.00000 | 0.00000 | 0.00546 | 0.00934 | 0.01326 | 0.00799 | 0.01626 | 0.01326 |
| Q9Z0E6 | GBP2_MOUSE  | 0.00000 | 0.00000 | 0.00000 | 0.00000 | 0.00000 | 0.00000 | 0.02263 | 0.01935 | 0.02913 | 0.02361 | 0.02439 | 0.02261 |
| Q9Z0F7 | SYUG_MOUSE  | 0.00000 | 0.00000 | 0.00000 | 0.00000 | 0.00000 | 0.00000 | 0.00271 | 0.00083 | 0.00455 | 0.00263 | 0.00134 | 0.00112 |
| Q9Z0F8 | ADA17_MOUSE | 0.00000 | 0.00000 | 0.00000 | 0.00000 | 0.00000 | 0.00000 | 0.00000 | 0.00079 | 0.00253 | 0.00248 | 0.00410 | 0.00255 |
| Q9Z0G9 | CLD3_MOUSE  | 0.00000 | 0.00000 | 0.00000 | 0.00000 | 0.00000 | 0.00000 | 0.00000 | 0.00000 | 0.00275 | 0.00208 | 0.00157 | 0.00146 |
| Q9Z0H4 | CELF2_MOUSE | 0.00000 | 0.00000 | 0.00000 | 0.00000 | 0.00000 | 0.00000 | 0.00658 | 0.00116 | 0.01104 | 0.00630 | 0.01128 | 0.01058 |
| Q9Z0K8 | VNN1_MOUSE  | 0.00000 | 0.00000 | 0.00000 | 0.00000 | 0.00000 | 0.00000 | 0.00000 | 0.00000 | 0.00000 | 0.00078 | 0.00000 | 0.00000 |
| Q9Z0M5 | LICH_MOUSE  | 0.00000 | 0.00000 | 0.00000 | 0.00000 | 0.00000 | 0.00000 | 0.00191 | 0.00479 | 0.00188 | 0.00103 | 0.00103 | 0.00459 |
| Q9Z0M6 | AGRE5_MOUSE | 0.00000 | 0.00000 | 0.00000 | 0.00000 | 0.00000 | 0.00000 | 0.00862 | 0.01032 | 0.01148 | 0.01004 | 0.01029 | 0.01266 |
| Q9Z0N1 | IF2G_MOUSE  | 0.00010 | 0.00000 | 0.00052 | 0.00030 | 0.00007 | 0.00000 | 0.00857 | 0.00765 | 0.01073 | 0.00872 | 0.01065 | 0.00857 |
| Q9Z0N2 | IF2H_MOUSE  | 0.00008 | 0.00000 | 0.00003 | 0.00000 | 0.00037 | 0.00025 | 0.00068 | 0.00169 | 0.00551 | 0.00176 | 0.00000 | 0.00343 |
| Q9Z0P4 | PALM_MOUSE  | 0.00000 | 0.00000 | 0.00000 | 0.00000 | 0.00000 | 0.00000 | 0.00374 | 0.01427 | 0.01756 | 0.01189 | 0.01051 | 0.01369 |
| Q9Z0P5 | TWF2_MOUSE  | 0.00599 | 0.00802 | 0.00543 | 0.00825 | 0.06488 | 0.00556 | 0.01760 | 0.01336 | 0.02374 | 0.01678 | 0.02115 | 0.01789 |
| Q9Z0S1 | BPNT1_MOUSE | 0.00361 | 0.00197 | 0.00318 | 0.00180 | 0.00249 | 0.00085 | 0.01336 | 0.01749 | 0.02448 | 0.01894 | 0.02042 | 0.01959 |
| Q9Z0S2 | LHX2_MOUSE  | 0.00000 | 0.00000 | 0.00000 | 0.00000 | 0.00000 | 0.00000 | 0.10399 | 0.07224 | 0.07796 | 0.14859 | 0.21804 | 0.03390 |
| Q9Z0T9 | ITB6_MOUSE  | 0.00000 | 0.00000 | 0.00000 | 0.00000 | 0.00000 | 0.00000 | 0.02909 | 0.07831 | 0.02419 | 0.03144 | 0.03019 | 0.05285 |
| Q9Z0U1 | ZO2_MOUSE   | 0.00000 | 0.00000 | 0.00000 | 0.00000 | 0.00000 | 0.00000 | 0.01076 | 0.02878 | 0.02932 | 0.03000 | 0.03364 | 0.02395 |
| Q9Z0W3 | NU160_MOUSE | 0.00000 | 0.00000 | 0.00000 | 0.00000 | 0.00000 | 0.00000 | 0.00031 | 0.00000 | 0.00116 | 0.00063 | 0.00104 | 0.00066 |
| Q9Z0X1 | AIFM1_MOUSE | 0.06131 | 0.05085 | 0.09590 | 0.05768 | 0.10223 | 0.04744 | 0.02145 | 0.01887 | 0.01281 | 0.01498 | 0.01503 | 0.01196 |
| Q9Z0X4 | PDE3A_MOUSE | 0.00000 | 0.00000 | 0.00000 | 0.00000 | 0.00000 | 0.00000 | 0.00481 | 0.01252 | 0.00878 | 0.01101 | 0.00882 | 0.01179 |

|        |             |         |         |         |         |         |         |         |         |         |         |         |         |
|--------|-------------|---------|---------|---------|---------|---------|---------|---------|---------|---------|---------|---------|---------|
| Q9Z126 | PLF4_MOUSE  | 0.00000 | 0.00000 | 0.00000 | 0.00000 | 0.00000 | 0.00000 | 0.00000 | 0.00113 | 0.00603 | 0.00445 | 0.00164 | 0.00223 |
| Q9Z130 | HNRDL_MOUSE | 0.00000 | 0.00000 | 0.00000 | 0.00000 | 0.00000 | 0.00000 | 0.00875 | 0.01281 | 0.01968 | 0.01648 | 0.01558 | 0.01928 |
| Q9Z1B3 | PLCB1_MOUSE | 0.00000 | 0.00000 | 0.00000 | 0.00000 | 0.00000 | 0.00000 | 0.00069 | 0.00151 | 0.00272 | 0.00077 | 0.00236 | 0.00148 |
| Q9Z1D1 | EIF3G_MOUSE | 0.00000 | 0.00000 | 0.00000 | 0.00000 | 0.00000 | 0.00000 | 0.01121 | 0.00982 | 0.01270 | 0.00942 | 0.01049 | 0.01029 |
| Q9Z1E4 | GYS1_MOUSE  | 0.01957 | 0.01607 | 0.03693 | 0.02851 | 0.02116 | 0.02472 | 0.04031 | 0.01466 | 0.01492 | 0.01578 | 0.00554 | 0.00636 |
| Q9Z1F9 | SAE2_MOUSE  | 0.00000 | 0.00000 | 0.00000 | 0.00000 | 0.00000 | 0.00000 | 0.02365 | 0.02971 | 0.03439 | 0.03453 | 0.04768 | 0.03984 |
| Q9Z1G3 | VATC1_MOUSE | 0.00000 | 0.00000 | 0.00000 | 0.00000 | 0.00000 | 0.00000 | 0.00000 | 0.00000 | 0.00067 | 0.00048 | 0.00000 | 0.00000 |
| Q9Z1G4 | VPP1_MOUSE  | 0.00000 | 0.00000 | 0.00000 | 0.00000 | 0.00000 | 0.00000 | 0.00164 | 0.00480 | 0.00093 | 0.00269 | 0.00000 | 0.00098 |
| Q9Z1J3 | NFS1_MOUSE  | 0.00747 | 0.00650 | 0.00597 | 0.00654 | 0.00742 | 0.00459 | 0.00072 | 0.00391 | 0.00220 | 0.00180 | 0.00192 | 0.00116 |
| Q9Z1K5 | ARI1_MOUSE  | 0.00000 | 0.00000 | 0.00000 | 0.00000 | 0.00000 | 0.00000 | 0.00000 | 0.00367 | 0.00427 | 0.00313 | 0.00142 | 0.00149 |
| Q9Z1M8 | RED_MOUSE   | 0.00000 | 0.00000 | 0.00000 | 0.00000 | 0.00000 | 0.00000 | 0.00000 | 0.00384 | 0.00308 | 0.00255 | 0.00415 | 0.00345 |
| Q9Z1N5 | DX39B_MOUSE | 0.00209 | 0.00116 | 0.00241 | 0.00158 | 0.00295 | 0.00239 | 0.03255 | 0.02831 | 0.04451 | 0.03628 | 0.03922 | 0.03810 |
| Q9Z1P6 | NDUA7_MOUSE | 0.00000 | 0.00000 | 0.00000 | 0.00000 | 0.00000 | 0.00000 | 0.00000 | 0.00000 | 0.00000 | 0.00000 | 0.00000 | 0.00000 |
| Q9Z1P7 | KANK3_MOUSE | 0.00000 | 0.00000 | 0.00000 | 0.00000 | 0.00000 | 0.00000 | 0.00230 | 0.00873 | 0.00911 | 0.00996 | 0.00464 | 0.01036 |
| Q9Z1Q2 | ABHGA_MOUSE | 0.00000 | 0.00000 | 0.00000 | 0.00000 | 0.00000 | 0.00000 | 0.00000 | 0.00000 | 0.00081 | 0.00000 | 0.00137 | 0.00033 |
| Q9Z1Q5 | CLIC1_MOUSE | 0.03921 | 0.02243 | 0.03259 | 0.01120 | 0.03569 | 0.01399 | 0.10642 | 0.09510 | 0.11502 | 0.11775 | 0.10376 | 0.13292 |
| Q9Z1Q9 | SYVC_MOUSE  | 0.00221 | 0.00351 | 0.00260 | 0.00398 | 0.00276 | 0.00083 | 0.03480 | 0.03085 | 0.04818 | 0.03672 | 0.03646 | 0.03746 |
| Q9Z1R2 | BAG6_MOUSE  | 0.00000 | 0.00000 | 0.00000 | 0.00000 | 0.00000 | 0.00000 | 0.00909 | 0.00416 | 0.00755 | 0.00338 | 0.00375 | 0.00486 |
| Q9Z1T1 | AP3B1_MOUSE | 0.00000 | 0.00000 | 0.00000 | 0.00000 | 0.00000 | 0.00000 | 0.01046 | 0.00978 | 0.01126 | 0.01019 | 0.00848 | 0.01304 |
| Q9Z1X4 | ILF3_MOUSE  | 0.00000 | 0.00000 | 0.00000 | 0.00000 | 0.00000 | 0.00000 | 0.01207 | 0.00920 | 0.01185 | 0.01249 | 0.00683 | 0.01472 |
| Q9Z1Y4 | TRIP6_MOUSE | 0.00000 | 0.00000 | 0.00000 | 0.00000 | 0.00000 | 0.00000 | 0.00000 | 0.00079 | 0.00232 | 0.00172 | 0.00000 | 0.00094 |
| Q9Z1Z0 | USO1_MOUSE  | 0.00643 | 0.00987 | 0.00636 | 0.00363 | 0.01099 | 0.00543 | 0.00876 | 0.00993 | 0.01401 | 0.01106 | 0.01137 | 0.01037 |
| Q9Z1Z2 | STRAP_MOUSE | 0.00694 | 0.00917 | 0.00416 | 0.00527 | 0.01001 | 0.00603 | 0.01823 | 0.01355 | 0.02160 | 0.02006 | 0.02115 | 0.01855 |
| Q9Z204 | HNRPC_MOUSE | 0.00000 | 0.00000 | 0.00000 | 0.00000 | 0.00000 | 0.00000 | 0.03404 | 0.03030 | 0.02450 | 0.03071 | 0.02755 | 0.03568 |
| Q9Z239 | PLM_MOUSE   | 0.00000 | 0.00000 | 0.00000 | 0.00000 | 0.00000 | 0.00000 | 0.00000 | 0.00660 | 0.00993 | 0.00891 | 0.00465 | 0.00380 |
| Q9Z247 | FKBP9_MOUSE | 0.00000 | 0.00000 | 0.00000 | 0.00000 | 0.00000 | 0.00000 | 0.00000 | 0.00140 | 0.00512 | 0.00517 | 0.00266 | 0.00710 |
| Q9Z261 | CLD7_MOUSE  | 0.00000 | 0.00000 | 0.00000 | 0.00000 | 0.00000 | 0.00000 | 0.00000 | 0.00000 | 0.00305 | 0.00100 | 0.00032 | 0.00551 |
| Q9Z266 | SNAPN_MOUSE | 0.00000 | 0.00000 | 0.00000 | 0.00000 | 0.00000 | 0.00000 | 0.00075 | 0.00201 | 0.00210 | 0.00323 | 0.00208 | 0.00448 |
| Q9Z277 | BAZ1B_MOUSE | 0.00000 | 0.00000 | 0.00000 | 0.00000 | 0.00000 | 0.00000 | 0.00298 | 0.00230 | 0.00317 | 0.00308 | 0.00437 | 0.00408 |
| Q9Z280 | PLD1_MOUSE  | 0.00000 | 0.00000 | 0.00000 | 0.00000 | 0.00000 | 0.00000 | 0.00000 | 0.00000 | 0.00067 | 0.00000 | 0.00080 | 0.00000 |
| Q9Z2A5 | ATE1_MOUSE  | 0.00000 | 0.00000 | 0.00000 | 0.00000 | 0.00000 | 0.00000 | 0.00271 | 0.00235 | 0.00513 | 0.00295 | 0.00603 | 0.00383 |
| Q9Z2C5 | MTM1_MOUSE  | 0.00000 | 0.00000 | 0.00000 | 0.00000 | 0.00000 | 0.00000 | 0.00064 | 0.00206 | 0.00145 | 0.00000 | 0.00000 | 0.00000 |
| Q9Z2C6 | UPK1B_MOUSE | 0.00000 | 0.00000 | 0.00000 | 0.00000 | 0.00000 | 0.00000 | 0.00035 | 0.00000 | 0.00100 | 0.00033 | 0.00084 | 0.00049 |
| Q9Z2D1 | MTMR2_MOUSE | 0.00000 | 0.00000 | 0.00000 | 0.00000 | 0.00000 | 0.00000 | 0.00000 | 0.00108 | 0.00000 | 0.00030 | 0.00111 | 0.00040 |

|        |             |         |         |         |         |         |         |         |         |         |         |         |         |
|--------|-------------|---------|---------|---------|---------|---------|---------|---------|---------|---------|---------|---------|---------|
| Q9Z2D6 | MECP2_MOUSE | 0.00147 | 0.00675 | 0.00198 | 0.00250 | 0.00274 | 0.00274 | 0.03366 | 0.04773 | 0.05484 | 0.04933 | 0.04635 | 0.04286 |
| Q9Z2G6 | SE1L1_MOUSE | 0.00000 | 0.00000 | 0.00000 | 0.00000 | 0.00000 | 0.00000 | 0.00000 | 0.00061 | 0.00089 | 0.00076 | 0.00000 | 0.00000 |
| Q9Z2H5 | E41L1_MOUSE | 0.00000 | 0.00000 | 0.00000 | 0.00000 | 0.00000 | 0.00000 | 0.00000 | 0.00171 | 0.00000 | 0.00119 | 0.01679 | 0.00904 |
| Q9Z2H7 | GIPC2_MOUSE | 0.00000 | 0.00000 | 0.00000 | 0.00000 | 0.00000 | 0.00000 | 0.01399 | 0.00703 | 0.00381 | 0.00830 | 0.00632 | 0.00448 |
| Q9Z2I0 | LETM1_MOUSE | 0.05513 | 0.04126 | 0.05912 | 0.03313 | 0.03847 | 0.04156 | 0.01656 | 0.01513 | 0.00991 | 0.01002 | 0.00936 | 0.01193 |
| Q9Z2I8 | SUCB2_MOUSE | 0.05851 | 0.03298 | 0.05682 | 0.03642 | 0.05160 | 0.04502 | 0.02644 | 0.02339 | 0.02217 | 0.02135 | 0.02292 | 0.02543 |
| Q9Z2I9 | SUCB1_MOUSE | 0.43121 | 0.29574 | 0.30563 | 0.29150 | 0.39264 | 0.36628 | 0.03511 | 0.03354 | 0.02806 | 0.02341 | 0.02635 | 0.02713 |
| Q9Z2J0 | S23A1_MOUSE | 0.00000 | 0.00000 | 0.00000 | 0.00000 | 0.00000 | 0.00000 | 0.00000 | 0.00000 | 0.00000 | 0.00000 | 0.00000 | 0.00000 |
| Q9Z2L7 | CRLF3_MOUSE | 0.00000 | 0.00000 | 0.00000 | 0.00000 | 0.00000 | 0.00000 | 0.00000 | 0.00235 | 0.00330 | 0.00300 | 0.00321 | 0.00166 |
| Q9Z2M7 | PMM2_MOUSE  | 0.00000 | 0.00000 | 0.00000 | 0.00000 | 0.00000 | 0.00000 | 0.00402 | 0.01139 | 0.02655 | 0.02397 | 0.01334 | 0.03388 |
| Q9Z2N8 | ACL6A_MOUSE | 0.00000 | 0.00000 | 0.00000 | 0.00000 | 0.00000 | 0.00000 | 0.01317 | 0.01057 | 0.01461 | 0.01512 | 0.01924 | 0.01796 |
| Q9Z2P8 | VAMP5_MOUSE | 0.00000 | 0.00000 | 0.00000 | 0.00000 | 0.00000 | 0.00000 | 0.00000 | 0.00513 | 0.00113 | 0.00082 | 0.00000 | 0.00460 |
| Q9Z2U0 | PSA7_MOUSE  | 0.01927 | 0.01984 | 0.02154 | 0.02001 | 0.01842 | 0.02665 | 0.03671 | 0.03335 | 0.02269 | 0.03406 | 0.02089 | 0.03675 |
| Q9Z2U1 | PSA5_MOUSE  | 0.00000 | 0.00000 | 0.00000 | 0.00000 | 0.00000 | 0.00000 | 0.04225 | 0.03916 | 0.05379 | 0.04698 | 0.06485 | 0.04661 |
| Q9Z2V4 | PCKGC_MOUSE | 0.00000 | 0.00000 | 0.00000 | 0.00000 | 0.00000 | 0.00000 | 0.00003 | 0.00017 | 0.00023 | 0.00020 | 0.00012 | 0.00019 |
| Q9Z2V5 | HDAC6_MOUSE | 0.00000 | 0.00000 | 0.00000 | 0.00000 | 0.00000 | 0.00000 | 0.00000 | 0.00000 | 0.00019 | 0.00020 | 0.00018 | 0.00036 |
| Q9Z2W0 | DNPEP_MOUSE | 0.00879 | 0.00884 | 0.01250 | 0.01154 | 0.00796 | 0.00845 | 0.00793 | 0.01254 | 0.01947 | 0.01262 | 0.01358 | 0.01627 |
| Q9Z2W1 | STK25_MOUSE | 0.00000 | 0.00000 | 0.00000 | 0.00000 | 0.00000 | 0.00000 | 0.00239 | 0.00427 | 0.00429 | 0.00202 | 0.00424 | 0.00391 |
| Q9Z2X1 | HNRPF_MOUSE | 0.00481 | 0.00326 | 0.00484 | 0.00311 | 0.00403 | 0.00263 | 0.05755 | 0.04388 | 0.07198 | 0.06171 | 0.08761 | 0.07926 |
| Q9Z2Y8 | PLPHP_MOUSE | 0.01009 | 0.00673 | 0.00834 | 0.00804 | 0.00957 | 0.00703 | 0.00920 | 0.01369 | 0.01407 | 0.01165 | 0.01418 | 0.01503 |
| Q9Z2Z6 | MCAT_MOUSE  | 0.00200 | 0.00627 | 0.00673 | 0.00594 | 0.00678 | 0.00737 | 0.01283 | 0.01912 | 0.00866 | 0.00760 | 0.00134 | 0.01268 |
| Q9Z306 | S22A4_MOUSE | 0.00000 | 0.00000 | 0.00000 | 0.00000 | 0.00000 | 0.00000 | 0.00000 | 0.00000 | 0.00000 | 0.00000 | 0.00000 | 0.00000 |
| Q9Z315 | SNUT1_MOUSE | 0.00000 | 0.00000 | 0.00000 | 0.00000 | 0.00000 | 0.00000 | 0.00254 | 0.00420 | 0.00535 | 0.00291 | 0.00520 | 0.00373 |
| O55111 | DSG2_MOUSE  | 0.03359 | 0.03626 | 0.02043 | 0.03848 | 0.03767 | 0.02539 | 0.00000 | 0.00000 | 0.00000 | 0.00000 | 0.00000 | 0.00000 |
| Q9ESD7 | DYSF_MOUSE  | 0.01874 | 0.01953 | 0.01190 | 0.02300 | 0.01680 | 0.01611 | 0.00000 | 0.00000 | 0.00000 | 0.00000 | 0.00000 | 0.00000 |
| Q62407 | SPEG_MOUSE  | 0.00795 | 0.00867 | 0.00419 | 0.00938 | 0.00712 | 0.00852 | 0.00000 | 0.00000 | 0.00000 | 0.00000 | 0.00000 | 0.00000 |
| Q0II04 | NEBL_MOUSE  | 0.03890 | 0.02381 | 0.05232 | 0.05075 | 0.03466 | 0.02401 | 0.00000 | 0.00000 | 0.00000 | 0.00000 | 0.00000 | 0.00000 |
| Q8C8R3 | ANK2_MOUSE  | 0.00906 | 0.00950 | 0.00941 | 0.01084 | 0.00871 | 0.00484 | 0.00000 | 0.00000 | 0.00000 | 0.00000 | 0.00000 | 0.00000 |
| Q80XB4 | NRAP_MOUSE  | 0.02369 | 0.04040 | 0.03125 | 0.03241 | 0.03649 | 0.03535 | 0.00000 | 0.00000 | 0.00000 | 0.00000 | 0.00000 | 0.00000 |
| Q6ZQ73 | CAND2_MOUSE | 0.01471 | 0.01620 | 0.01643 | 0.01521 | 0.01442 | 0.01263 | 0.00000 | 0.00000 | 0.00000 | 0.00000 | 0.00000 | 0.00000 |
| Q9CWF2 | TBB2B_MOUSE | 0.00585 | 0.00655 | 0.00309 | 0.00901 | 0.00682 | 0.00532 | 0.00000 | 0.00000 | 0.00000 | 0.00000 | 0.00000 | 0.00000 |
| O70373 | XIRP1_MOUSE | 0.01213 | 0.01118 | 0.01010 | 0.00805 | 0.00639 | 0.00769 | 0.00000 | 0.00000 | 0.00000 | 0.00000 | 0.00000 | 0.00000 |
| P15116 | CADH2_MOUSE | 0.04340 | 0.03676 | 0.03303 | 0.02571 | 0.03028 | 0.03715 | 0.00000 | 0.00000 | 0.00000 | 0.00000 | 0.00000 | 0.00000 |
| Q99MR9 | PPR3A_MOUSE | 0.00876 | 0.00607 | 0.00661 | 0.01135 | 0.00640 | 0.00894 | 0.00000 | 0.00000 | 0.00000 | 0.00000 | 0.00000 | 0.00000 |

|        |             |         |         |         |         |         |         |         |         |         |         |         |         |
|--------|-------------|---------|---------|---------|---------|---------|---------|---------|---------|---------|---------|---------|---------|
| Q3UIZ8 | MYLK3_MOUSE | 0.00923 | 0.01359 | 0.00779 | 0.01028 | 0.00702 | 0.00847 | 0.00000 | 0.00000 | 0.00000 | 0.00000 | 0.00000 | 0.00000 |
| P05214 | TBA3_MOUSE  | 0.00075 | 0.00153 | 0.00108 | 0.00240 | 0.00088 | 0.00143 | 0.00000 | 0.00000 | 0.00000 | 0.00000 | 0.00000 | 0.00000 |
| Q61738 | ITA7_MOUSE  | 0.01437 | 0.01967 | 0.00955 | 0.00818 | 0.01541 | 0.01248 | 0.00000 | 0.00000 | 0.00000 | 0.00000 | 0.00000 | 0.00000 |
| Q65CL1 | CTNA3_MOUSE | 0.01184 | 0.01481 | 0.00818 | 0.00850 | 0.01127 | 0.00661 | 0.00000 | 0.00000 | 0.00000 | 0.00000 | 0.00000 | 0.00000 |
| E9Q4Z2 | ACACB_MOUSE | 0.00639 | 0.01150 | 0.00781 | 0.01398 | 0.00684 | 0.01170 | 0.00000 | 0.00000 | 0.00000 | 0.00000 | 0.00000 | 0.00000 |
| P07758 | A1AT1_MOUSE | 0.01097 | 0.00886 | 0.00764 | 0.01624 | 0.01718 | 0.00392 | 0.00000 | 0.00000 | 0.00000 | 0.00000 | 0.00000 | 0.00000 |
| Q91ZU6 | DYST_MOUSE  | 0.00590 | 0.00560 | 0.00464 | 0.00535 | 0.00644 | 0.00580 | 0.00000 | 0.00000 | 0.00000 | 0.00000 | 0.00000 | 0.00000 |
| P62715 | PP2AB_MOUSE | 0.00446 | 0.00111 | 0.00422 | 0.00278 | 0.00215 | 0.00274 | 0.00000 | 0.00000 | 0.00000 | 0.00000 | 0.00000 | 0.00000 |
| F2Z472 | SVS3A_MOUSE | 0.01253 | 0.00702 | 0.01755 | 0.34739 | 0.00604 | 0.01356 | 0.00000 | 0.00000 | 0.00000 | 0.00000 | 0.00000 | 0.00000 |
| Q8K009 | AL1L2_MOUSE | 0.00513 | 0.01358 | 0.00255 | 0.00540 | 0.00314 | 0.00293 | 0.00000 | 0.00000 | 0.00000 | 0.00000 | 0.00000 | 0.00000 |
| Q811U4 | MFN1_MOUSE  | 0.02196 | 0.02036 | 0.02643 | 0.03259 | 0.02283 | 0.01711 | 0.00000 | 0.00000 | 0.00000 | 0.00000 | 0.00000 | 0.00000 |
| Q9QZF2 | GPC1_MOUSE  | 0.00587 | 0.00500 | 0.00717 | 0.00689 | 0.00531 | 0.00374 | 0.00000 | 0.00000 | 0.00000 | 0.00000 | 0.00000 | 0.00000 |
| Q8BWB1 | SYP2L_MOUSE | 0.00476 | 0.00593 | 0.00480 | 0.00330 | 0.00737 | 0.00374 | 0.00000 | 0.00000 | 0.00000 | 0.00000 | 0.00000 | 0.00000 |
| Q8BRK8 | AAPK2_MOUSE | 0.00806 | 0.00389 | 0.00653 | 0.00580 | 0.00488 | 0.00308 | 0.00000 | 0.00000 | 0.00000 | 0.00000 | 0.00000 | 0.00000 |
| Q8CGY6 | UN45B_MOUSE | 0.00344 | 0.00623 | 0.00579 | 0.00482 | 0.00523 | 0.00518 | 0.00000 | 0.00000 | 0.00000 | 0.00000 | 0.00000 | 0.00000 |
| P30933 | SVS5_MOUSE  | 0.00057 | 0.00151 | 0.00452 | 0.13018 | 0.00086 | 0.00103 | 0.00000 | 0.00000 | 0.00000 | 0.00000 | 0.00000 | 0.00000 |
| P62962 | PROF1_MOUSE | 0.02842 | 0.02172 | 0.01375 | 0.02371 | 0.02776 | 0.06677 | 0.00000 | 0.00000 | 0.00000 | 0.00000 | 0.00000 | 0.00000 |
| O89020 | AFAM_MOUSE  | 0.00098 | 0.00078 | 0.00111 | 0.00249 | 0.00195 | 0.00238 | 0.00000 | 0.00000 | 0.00000 | 0.00000 | 0.00000 | 0.00000 |
| Q9JI39 | ABCBA_MOUSE | 0.00235 | 0.00464 | 0.00831 | 0.00721 | 0.01406 | 0.00830 | 0.00000 | 0.00000 | 0.00000 | 0.00000 | 0.00000 | 0.00000 |
| O70433 | FHL2_MOUSE  | 0.00737 | 0.00458 | 0.00910 | 0.01200 | 0.01252 | 0.00588 | 0.00000 | 0.00000 | 0.00000 | 0.00000 | 0.00000 | 0.00000 |
| Q76LL6 | FHOD3_MOUSE | 0.00041 | 0.00086 | 0.00095 | 0.00088 | 0.00118 | 0.00075 | 0.00000 | 0.00000 | 0.00000 | 0.00000 | 0.00000 | 0.00000 |
| Q8R1S0 | COQ6_MOUSE  | 0.01269 | 0.01014 | 0.02072 | 0.01325 | 0.01597 | 0.01508 | 0.00000 | 0.00000 | 0.00000 | 0.00000 | 0.00000 | 0.00000 |
| P55292 | DSC2_MOUSE  | 0.01872 | 0.02078 | 0.01494 | 0.01617 | 0.01567 | 0.01995 | 0.00000 | 0.00000 | 0.00000 | 0.00000 | 0.00000 | 0.00000 |
| Q8BGK2 | ARHL1_MOUSE | 0.04974 | 0.04614 | 0.03785 | 0.03329 | 0.03350 | 0.04023 | 0.00000 | 0.00000 | 0.00000 | 0.00000 | 0.00000 | 0.00000 |
| Q3UHZ5 | LMOD2_MOUSE | 0.00929 | 0.00536 | 0.00780 | 0.00868 | 0.00813 | 0.00371 | 0.00000 | 0.00000 | 0.00000 | 0.00000 | 0.00000 | 0.00000 |
| Q8VD26 | TM143_MOUSE | 0.00759 | 0.00628 | 0.01016 | 0.00874 | 0.00711 | 0.00901 | 0.00000 | 0.00000 | 0.00000 | 0.00000 | 0.00000 | 0.00000 |
| Q8C7H1 | MMAA_MOUSE  | 0.00415 | 0.00264 | 0.00436 | 0.00387 | 0.00374 | 0.00263 | 0.00000 | 0.00000 | 0.00000 | 0.00000 | 0.00000 | 0.00000 |
| Q8BVZ1 | PLIN5_MOUSE | 0.00413 | 0.00213 | 0.00199 | 0.00197 | 0.00259 | 0.00279 | 0.00000 | 0.00000 | 0.00000 | 0.00000 | 0.00000 | 0.00000 |
| Q4U4S6 | XIRP2_MOUSE | 0.00086 | 0.00106 | 0.00107 | 0.00730 | 0.00087 | 0.01009 | 0.00000 | 0.00000 | 0.00000 | 0.00000 | 0.00000 | 0.00000 |
| Q62059 | CSPG2_MOUSE | 0.01772 | 0.04531 | 0.02625 | 0.03222 | 0.03106 | 0.04834 | 0.00000 | 0.00000 | 0.00000 | 0.00000 | 0.00000 | 0.00000 |
| P19639 | GSTM3_MOUSE | 0.00060 | 0.00107 | 0.00139 | 0.00038 | 0.00020 | 0.00011 | 0.00000 | 0.00000 | 0.00000 | 0.00000 | 0.00000 | 0.00000 |
| Q3UFY7 | 5NT3B_MOUSE | 0.00525 | 0.00191 | 0.00694 | 0.00207 | 0.00243 | 0.00221 | 0.00000 | 0.00000 | 0.00000 | 0.00000 | 0.00000 | 0.00000 |
| Q9ER35 | FN3K_MOUSE  | 0.01215 | 0.00199 | 0.00248 | 0.00221 | 0.00184 | 0.00135 | 0.00000 | 0.00000 | 0.00000 | 0.00000 | 0.00000 | 0.00000 |
| Q9D0L4 | ADCK1_MOUSE | 0.01753 | 0.01323 | 0.00795 | 0.00650 | 0.00725 | 0.00698 | 0.00000 | 0.00000 | 0.00000 | 0.00000 | 0.00000 | 0.00000 |

|        |             |         |         |         |         |         |         |         |         |         |         |         |         |
|--------|-------------|---------|---------|---------|---------|---------|---------|---------|---------|---------|---------|---------|---------|
| P0DP26 | CALM1_MOUSE | 0.04293 | 0.06117 | 0.03337 | 0.04652 | 0.03732 | 0.06627 | 0.00000 | 0.00000 | 0.00000 | 0.00000 | 0.00000 | 0.00000 |
| Q8CHS7 | DRS7C_MOUSE | 0.00511 | 0.00604 | 0.00540 | 0.00617 | 0.00576 | 0.00773 | 0.00000 | 0.00000 | 0.00000 | 0.00000 | 0.00000 | 0.00000 |
| P98156 | VLDLR_MOUSE | 0.00169 | 0.00239 | 0.00151 | 0.00145 | 0.00221 | 0.00248 | 0.00000 | 0.00000 | 0.00000 | 0.00000 | 0.00000 | 0.00000 |
| Q6PAM0 | AAKB2_MOUSE | 0.00172 | 0.00245 | 0.00211 | 0.00355 | 0.00103 | 0.00264 | 0.00000 | 0.00000 | 0.00000 | 0.00000 | 0.00000 | 0.00000 |
| P35385 | HSPB7_MOUSE | 0.00511 | 0.00510 | 0.00328 | 0.01084 | 0.00358 | 0.00178 | 0.00000 | 0.00000 | 0.00000 | 0.00000 | 0.00000 | 0.00000 |
| P62880 | GBB2_MOUSE  | 0.02197 | 0.01640 | 0.01460 | 0.01067 | 0.02649 | 0.02444 | 0.00000 | 0.00000 | 0.00000 | 0.00000 | 0.00000 | 0.00000 |
| Q80X76 | SPA3F_MOUSE | 0.00033 | 0.00152 | 0.00033 | 0.00032 | 0.00027 | 0.00045 | 0.00000 | 0.00000 | 0.00000 | 0.00000 | 0.00000 | 0.00000 |
| Q99JR6 | NMNA3_MOUSE | 0.00298 | 0.00306 | 0.00488 | 0.00381 | 0.00296 | 0.00208 | 0.00000 | 0.00000 | 0.00000 | 0.00000 | 0.00000 | 0.00000 |
| Q91WC3 | ACSL6_MOUSE | 0.00712 | 0.00284 | 0.00256 | 0.00300 | 0.00362 | 0.00212 | 0.00000 | 0.00000 | 0.00000 | 0.00000 | 0.00000 | 0.00000 |
| Q99MS7 | EH1L1_MOUSE | 0.00252 | 0.00313 | 0.00233 | 0.00225 | 0.00243 | 0.00254 | 0.00000 | 0.00000 | 0.00000 | 0.00000 | 0.00000 | 0.00000 |
| O70548 | TELT_MOUSE  | 0.01481 | 0.01504 | 0.01489 | 0.01566 | 0.02080 | 0.00749 | 0.00000 | 0.00000 | 0.00000 | 0.00000 | 0.00000 | 0.00000 |
| P07934 | PHKG1_MOUSE | 0.00194 | 0.00386 | 0.00087 | 0.00304 | 0.00150 | 0.00143 | 0.00000 | 0.00000 | 0.00000 | 0.00000 | 0.00000 | 0.00000 |
| P16627 | HS71L_MOUSE | 0.00034 | 0.00053 | 0.00033 | 0.00036 | 0.00034 | 0.00037 | 0.00000 | 0.00000 | 0.00000 | 0.00000 | 0.00000 | 0.00000 |
| Q9CWX2 | CIA30_MOUSE | 0.00261 | 0.00262 | 0.00394 | 0.00416 | 0.00240 | 0.00210 | 0.00000 | 0.00000 | 0.00000 | 0.00000 | 0.00000 | 0.00000 |
| Q9CR24 | NUDT8_MOUSE | 0.00650 | 0.00787 | 0.00533 | 0.00623 | 0.00677 | 0.00323 | 0.00000 | 0.00000 | 0.00000 | 0.00000 | 0.00000 | 0.00000 |
| P56501 | UCP3_MOUSE  | 0.01200 | 0.02201 | 0.02396 | 0.02800 | 0.01470 | 0.00653 | 0.00000 | 0.00000 | 0.00000 | 0.00000 | 0.00000 | 0.00000 |
| Q6PD31 | TRAK1_MOUSE | 0.00269 | 0.00157 | 0.00102 | 0.00158 | 0.00105 | 0.00166 | 0.00000 | 0.00000 | 0.00000 | 0.00000 | 0.00000 | 0.00000 |
| Q8CEK3 | SPIKL_MOUSE | 0.00008 | 0.00022 | 0.00035 | 0.03220 | 0.00007 | 0.00000 | 0.00000 | 0.00000 | 0.00000 | 0.00000 | 0.00000 | 0.00000 |
| P56391 | CX6B1_MOUSE | 0.38151 | 0.18198 | 0.29293 | 0.15187 | 0.26038 | 0.16611 | 0.00000 | 0.00000 | 0.00000 | 0.00000 | 0.00000 | 0.00000 |
| A6H611 | MIPEP_MOUSE | 0.00986 | 0.00711 | 0.00540 | 0.00508 | 0.00150 | 0.00165 | 0.00000 | 0.00000 | 0.00000 | 0.00000 | 0.00000 | 0.00000 |
| Q8R3Q6 | CCD58_MOUSE | 0.00809 | 0.02243 | 0.04191 | 0.12814 | 0.19365 | 0.01024 | 0.00000 | 0.00000 | 0.00000 | 0.00000 | 0.00000 | 0.00000 |
| Q3TVI8 | PBIP1_MOUSE | 0.00000 | 0.00027 | 0.00015 | 0.00006 | 0.00098 | 0.00013 | 0.00000 | 0.00000 | 0.00000 | 0.00000 | 0.00000 | 0.00000 |
| Q8R2G4 | NAR3_MOUSE  | 0.01524 | 0.04061 | 0.01140 | 0.02159 | 0.02717 | 0.02694 | 0.00000 | 0.00000 | 0.00000 | 0.00000 | 0.00000 | 0.00000 |
| Q3U0B3 | DHR11_MOUSE | 0.00243 | 0.01855 | 0.00577 | 0.02881 | 0.00502 | 0.03058 | 0.00000 | 0.00000 | 0.00000 | 0.00000 | 0.00000 | 0.00000 |
| A2A884 | ZEP3_MOUSE  | 0.00157 | 0.00265 | 0.00148 | 0.00187 | 0.00174 | 0.00869 | 0.00000 | 0.00000 | 0.00000 | 0.00000 | 0.00000 | 0.00000 |
| Q9CPS6 | HINT3_MOUSE | 0.00029 | 0.00000 | 0.00031 | 0.00032 | 0.00054 | 0.00058 | 0.00000 | 0.00000 | 0.00000 | 0.00000 | 0.00000 | 0.00000 |
| P82350 | SGCA_MOUSE  | 0.01169 | 0.01608 | 0.00911 | 0.01028 | 0.00443 | 0.00873 | 0.00000 | 0.00000 | 0.00000 | 0.00000 | 0.00000 | 0.00000 |
| Q8BFZ1 | TECRL_MOUSE | 0.03434 | 0.00659 | 0.00676 | 0.00674 | 0.00730 | 0.00697 | 0.00000 | 0.00000 | 0.00000 | 0.00000 | 0.00000 | 0.00000 |
| Q9WU27 | SH3BG_MOUSE | 0.00030 | 0.00000 | 0.00009 | 0.00036 | 0.00028 | 0.00035 | 0.00000 | 0.00000 | 0.00000 | 0.00000 | 0.00000 | 0.00000 |
| Q61207 | SAP_MOUSE   | 0.02945 | 0.03181 | 0.03458 | 0.03723 | 0.04069 | 0.03345 | 0.00000 | 0.00000 | 0.00000 | 0.00000 | 0.00000 | 0.00000 |
| P70170 | ABCC9_MOUSE | 0.00185 | 0.00460 | 0.00374 | 0.00257 | 0.00104 | 0.00137 | 0.00000 | 0.00000 | 0.00000 | 0.00000 | 0.00000 | 0.00000 |
| P42230 | STA5A_MOUSE | 0.00715 | 0.00113 | 0.00122 | 0.00948 | 0.00414 | 0.00313 | 0.00000 | 0.00000 | 0.00000 | 0.00000 | 0.00000 | 0.00000 |
| Q99MI1 | RB6I2_MOUSE | 0.00150 | 0.00164 | 0.00133 | 0.00117 | 0.00187 | 0.00179 | 0.00000 | 0.00000 | 0.00000 | 0.00000 | 0.00000 | 0.00000 |
| Q91VW5 | GOGA4_MOUSE | 0.00016 | 0.00317 | 0.00031 | 0.00050 | 0.00046 | 0.00021 | 0.00000 | 0.00000 | 0.00000 | 0.00000 | 0.00000 | 0.00000 |



|        |             |         |         |         |         |         |         |         |         |         |         |         |         |
|--------|-------------|---------|---------|---------|---------|---------|---------|---------|---------|---------|---------|---------|---------|
| Q91YM4 | FAKD4_MOUSE | 0.00090 | 0.00136 | 0.00170 | 0.00284 | 0.00144 | 0.00160 | 0.00000 | 0.00000 | 0.00000 | 0.00000 | 0.00000 | 0.00000 |
| Q3UTJ2 | SRBS2_MOUSE | 0.00494 | 0.00489 | 0.00618 | 0.00810 | 0.00538 | 0.00827 | 0.00000 | 0.00000 | 0.00000 | 0.00000 | 0.00000 | 0.00000 |
| Q6IR34 | GPSM1_MOUSE | 0.00149 | 0.00156 | 0.00152 | 0.00098 | 0.00046 | 0.00105 | 0.00000 | 0.00000 | 0.00000 | 0.00000 | 0.00000 | 0.00000 |
| Q9CQT1 | MTNA_MOUSE  | 0.00000 | 0.00029 | 0.00059 | 0.00064 | 0.00050 | 0.00031 | 0.00000 | 0.00000 | 0.00000 | 0.00000 | 0.00000 | 0.00000 |
| Q6NVE9 | PPTC7_MOUSE | 0.00366 | 0.00130 | 0.00256 | 0.00320 | 0.00217 | 0.00331 | 0.00000 | 0.00000 | 0.00000 | 0.00000 | 0.00000 | 0.00000 |
| Q9DCZ1 | GMPR1_MOUSE | 0.00315 | 0.00009 | 0.00275 | 0.00332 | 0.00448 | 0.00114 | 0.00000 | 0.00000 | 0.00000 | 0.00000 | 0.00000 | 0.00000 |
| Q9R013 | CATF_MOUSE  | 0.00088 | 0.00063 | 0.00047 | 0.00028 | 0.00095 | 0.00114 | 0.00000 | 0.00000 | 0.00000 | 0.00000 | 0.00000 | 0.00000 |
| Q9CXU9 | EIF1B_MOUSE | 0.00376 | 0.00167 | 0.00271 | 0.00082 | 0.00230 | 0.00159 | 0.00000 | 0.00000 | 0.00000 | 0.00000 | 0.00000 | 0.00000 |
| E9Q9K5 | TRDN_MOUSE  | 0.00373 | 0.00550 | 0.00302 | 0.00495 | 0.00536 | 0.00262 | 0.00000 | 0.00000 | 0.00000 | 0.00000 | 0.00000 | 0.00000 |
| Q9CYT6 | CAP2_MOUSE  | 0.00742 | 0.00548 | 0.00298 | 0.00538 | 0.00459 | 0.00665 | 0.00000 | 0.00000 | 0.00000 | 0.00000 | 0.00000 | 0.00000 |
| Q9D8H7 | OMA1_MOUSE  | 0.00034 | 0.00128 | 0.00268 | 0.00113 | 0.00083 | 0.00087 | 0.00000 | 0.00000 | 0.00000 | 0.00000 | 0.00000 | 0.00000 |
| P21126 | UBL4A_MOUSE | 0.00430 | 0.01037 | 0.00457 | 0.00754 | 0.01071 | 0.00307 | 0.00000 | 0.00000 | 0.00000 | 0.00000 | 0.00000 | 0.00000 |
| A2AGL3 | RYR3_MOUSE  | 0.00108 | 0.00140 | 0.00106 | 0.00121 | 0.00164 | 0.00156 | 0.00000 | 0.00000 | 0.00000 | 0.00000 | 0.00000 | 0.00000 |
| Q9JIK9 | RT34_MOUSE  | 0.00035 | 0.00149 | 0.00135 | 0.00125 | 0.00127 | 0.00106 | 0.00000 | 0.00000 | 0.00000 | 0.00000 | 0.00000 | 0.00000 |
| Q6ZQB6 | VIP2_MOUSE  | 0.00188 | 0.00238 | 0.00218 | 0.00199 | 0.00203 | 0.00241 | 0.00000 | 0.00000 | 0.00000 | 0.00000 | 0.00000 | 0.00000 |
| Q8BTX9 | HSDL1_MOUSE | 0.00056 | 0.00000 | 0.00046 | 0.00112 | 0.00010 | 0.00021 | 0.00000 | 0.00000 | 0.00000 | 0.00000 | 0.00000 | 0.00000 |
| Q9WV96 | T10B_MOUSE  | 0.00052 | 0.00038 | 0.00042 | 0.00015 | 0.00057 | 0.00010 | 0.00000 | 0.00000 | 0.00000 | 0.00000 | 0.00000 | 0.00000 |
| Q5ND29 | RILP_MOUSE  | 0.02159 | 0.00014 | 0.00032 | 0.00255 | 0.01613 | 0.00823 | 0.00000 | 0.00000 | 0.00000 | 0.00000 | 0.00000 | 0.00000 |
| Q9D7J4 | COX20_MOUSE | 0.01549 | 0.01144 | 0.01451 | 0.00711 | 0.01096 | 0.00741 | 0.00000 | 0.00000 | 0.00000 | 0.00000 | 0.00000 | 0.00000 |
| Q8BKE9 | IFT74_MOUSE | 0.00128 | 0.00214 | 0.00131 | 0.00102 | 0.00232 | 0.00186 | 0.00000 | 0.00000 | 0.00000 | 0.00000 | 0.00000 | 0.00000 |
| Q5H8C4 | VP13A_MOUSE | 0.16984 | 0.09104 | 0.09023 | 0.05183 | 0.07122 | 0.07673 | 0.00000 | 0.00000 | 0.00000 | 0.00000 | 0.00000 | 0.00000 |
| Q6QD59 | SEC20_MOUSE | 0.00173 | 0.00169 | 0.00134 | 0.00168 | 0.00133 | 0.00178 | 0.00000 | 0.00000 | 0.00000 | 0.00000 | 0.00000 | 0.00000 |
| Q8BH55 | THNS1_MOUSE | 0.00367 | 0.00169 | 0.00175 | 0.00335 | 0.00084 | 0.00070 | 0.00000 | 0.00000 | 0.00000 | 0.00000 | 0.00000 | 0.00000 |
| Q8BYM8 | SYCM_MOUSE  | 0.00369 | 0.00259 | 0.00327 | 0.00206 | 0.00322 | 0.00333 | 0.00000 | 0.00000 | 0.00000 | 0.00000 | 0.00000 | 0.00000 |
| Q8C0M9 | ASGL1_MOUSE | 0.00433 | 0.00322 | 0.00179 | 0.00217 | 0.00341 | 0.00372 | 0.00000 | 0.00000 | 0.00000 | 0.00000 | 0.00000 | 0.00000 |
| P48725 | PCNT_MOUSE  | 0.01195 | 0.00701 | 0.01303 | 0.00758 | 0.00783 | 0.01626 | 0.00000 | 0.00000 | 0.00000 | 0.00000 | 0.00000 | 0.00000 |
| Q8C0L9 | GPCP1_MOUSE | 0.00286 | 0.00150 | 0.00411 | 0.00129 | 0.00212 | 0.00146 | 0.00000 | 0.00000 | 0.00000 | 0.00000 | 0.00000 | 0.00000 |
| A2ARZ3 | FSIP2_MOUSE | 0.00990 | 0.00954 | 0.00854 | 0.01229 | 0.00901 | 0.00583 | 0.00000 | 0.00000 | 0.00000 | 0.00000 | 0.00000 | 0.00000 |
| Q8R104 | SIR3_MOUSE  | 0.00387 | 0.00280 | 0.00358 | 0.00240 | 0.00360 | 0.00360 | 0.00000 | 0.00000 | 0.00000 | 0.00000 | 0.00000 | 0.00000 |
| Q920M5 | CORO6_MOUSE | 0.00043 | 0.00166 | 0.00163 | 0.00080 | 0.00062 | 0.00213 | 0.00000 | 0.00000 | 0.00000 | 0.00000 | 0.00000 | 0.00000 |
| Q61400 | CEAMA_MOUSE | 0.00301 | 0.00083 | 0.00316 | 0.00357 | 0.00095 | 0.00289 | 0.00000 | 0.00000 | 0.00000 | 0.00000 | 0.00000 | 0.00000 |
| P49945 | FRIL2_MOUSE | 0.00305 | 0.00392 | 0.00616 | 0.00448 | 0.00369 | 0.00232 | 0.00000 | 0.00000 | 0.00000 | 0.00000 | 0.00000 | 0.00000 |
| Q5SSK3 | TEFM_MOUSE  | 0.00928 | 0.00375 | 0.00356 | 0.00254 | 0.00435 | 0.00352 | 0.00000 | 0.00000 | 0.00000 | 0.00000 | 0.00000 | 0.00000 |
| Q9D7H3 | RTCA_MOUSE  | 0.00125 | 0.00248 | 0.00147 | 0.00206 | 0.00151 | 0.00126 | 0.00000 | 0.00000 | 0.00000 | 0.00000 | 0.00000 | 0.00000 |

|        |             |         |         |         |         |         |         |         |         |         |         |         |         |
|--------|-------------|---------|---------|---------|---------|---------|---------|---------|---------|---------|---------|---------|---------|
| P62983 | RS27A_MOUSE | 0.21281 | 0.20518 | 0.17202 | 0.16028 | 0.13094 | 0.14994 | 0.00000 | 0.00000 | 0.00000 | 0.00000 | 0.00000 | 0.00000 |
| Q8BZ52 | FSD2_MOUSE  | 0.00064 | 0.00027 | 0.00052 | 0.00049 | 0.00081 | 0.00011 | 0.00000 | 0.00000 | 0.00000 | 0.00000 | 0.00000 | 0.00000 |
| Q3ULF4 | SPG7_MOUSE  | 0.00190 | 0.00151 | 0.00084 | 0.00142 | 0.00100 | 0.00075 | 0.00000 | 0.00000 | 0.00000 | 0.00000 | 0.00000 | 0.00000 |
| O35660 | GSTM6_MOUSE | 0.00254 | 0.00526 | 0.00365 | 0.00324 | 0.00337 | 0.00329 | 0.00000 | 0.00000 | 0.00000 | 0.00000 | 0.00000 | 0.00000 |
| Q69ZN6 | GNPTA_MOUSE | 0.00510 | 0.00821 | 0.00432 | 0.00353 | 0.00303 | 0.00594 | 0.00000 | 0.00000 | 0.00000 | 0.00000 | 0.00000 | 0.00000 |
| Q8BJZ4 | RT35_MOUSE  | 0.00144 | 0.00381 | 0.00156 | 0.00190 | 0.00163 | 0.00210 | 0.00000 | 0.00000 | 0.00000 | 0.00000 | 0.00000 | 0.00000 |
| Q8CHC4 | SYNJ1_MOUSE | 0.00690 | 0.00732 | 0.00637 | 0.00669 | 0.00632 | 0.00525 | 0.00000 | 0.00000 | 0.00000 | 0.00000 | 0.00000 | 0.00000 |
| Q9D273 | MMAB_MOUSE  | 0.01204 | 0.00624 | 0.00584 | 0.00272 | 0.00856 | 0.00671 | 0.00000 | 0.00000 | 0.00000 | 0.00000 | 0.00000 | 0.00000 |
| O70571 | PDK4_MOUSE  | 0.00094 | 0.00101 | 0.00086 | 0.00054 | 0.00164 | 0.00000 | 0.00000 | 0.00000 | 0.00000 | 0.00000 | 0.00000 | 0.00000 |
| Q9WUF3 | C8AP2_MOUSE | 0.00804 | 0.00804 | 0.00722 | 0.00519 | 0.00584 | 0.00753 | 0.00000 | 0.00000 | 0.00000 | 0.00000 | 0.00000 | 0.00000 |
| Q8BKY8 | MTEF2_MOUSE | 0.01366 | 0.00910 | 0.00944 | 0.00893 | 0.00880 | 0.00787 | 0.00000 | 0.00000 | 0.00000 | 0.00000 | 0.00000 | 0.00000 |
| Q6P549 | SHIP2_MOUSE | 0.00302 | 0.00356 | 0.00168 | 0.00153 | 0.00264 | 0.00234 | 0.00000 | 0.00000 | 0.00000 | 0.00000 | 0.00000 | 0.00000 |
| Q99N96 | RM01_MOUSE  | 0.00457 | 0.00294 | 0.00240 | 0.00326 | 0.00262 | 0.00282 | 0.00000 | 0.00000 | 0.00000 | 0.00000 | 0.00000 | 0.00000 |
| P14427 | HA14_MOUSE  | 0.00228 | 0.00185 | 0.00489 | 0.00098 | 0.00136 | 0.00552 | 0.00000 | 0.00000 | 0.00000 | 0.00000 | 0.00000 | 0.00000 |
| Q3UHB1 | NT5D3_MOUSE | 0.00075 | 0.00058 | 0.00105 | 0.00050 | 0.00059 | 0.00092 | 0.00000 | 0.00000 | 0.00000 | 0.00000 | 0.00000 | 0.00000 |
| Q9ERP3 | TRI54_MOUSE | 0.00500 | 0.00484 | 0.00372 | 0.00167 | 0.00555 | 0.00350 | 0.00000 | 0.00000 | 0.00000 | 0.00000 | 0.00000 | 0.00000 |
| Q8VBT1 | TXLNB_MOUSE | 0.00213 | 0.00477 | 0.00164 | 0.00104 | 0.00181 | 0.00248 | 0.00000 | 0.00000 | 0.00000 | 0.00000 | 0.00000 | 0.00000 |
